# Supplementary material for: Mesoionic N-heterocyclic olefin catalysed reductive functionalization of CO2 for consecutive N-methylation of amines
Source: Royal Society of Chemistry journal article supplement (doi:10.1039/d1sc02819g), 2021-01-01
Supplement: d1sc02819g1.pdf [file d1sc02819g1.pdf]

## Supporting Information

### **Mesoionic N-heterocyclic Olefin Catalysed Reductive Functionalization of CO<sub>2</sub> for Consecutive N-Methylation of Amines**

Subir Maji, Arpan Das and Swadhin K. Mandal\*

Department of Chemical Sciences, Indian Institute of Science Education and Research  
Kolkata, Mohanpur 741246, India

\*Correspondence to: [swadhin.mandal@iiserkol.ac.in](mailto:swadhin.mandal@iiserkol.ac.in)

| <b>Table of Contents:</b>                                                  | <b>Page</b>      |
|----------------------------------------------------------------------------|------------------|
| <b>I) General consideration</b>                                            | <b>S1-S2</b>     |
| <b>II) Experimental Details</b>                                            | <b>S2-S33</b>    |
| <b>III) Characterization of N-methyl and N,N- dimethyl amine compounds</b> | <b>S34-S45</b>   |
| <b>IV) X-ray crystallographic details</b>                                  | <b>S45-S47</b>   |
| <b>V) <sup>1</sup>H and <sup>13</sup>C NMR spectra</b>                     | <b>S48-S81</b>   |
| <b>VI) Computational Study</b>                                             | <b>S82-S141</b>  |
| <b>VII) References</b>                                                     | <b>S141-S142</b> |

#### **I) General Information**

##### **General reagent information**

All air- and moisture-sensitive manipulations were carried out using a standard high vacuum line, Schlenk or cannula techniques, or in an MBraun drybox containing an atmosphere of purified argon. All glassware were oven-dried overnight at 130 °C before use. Solvents such as benzene, toluene, diethyl ether, hexane, and tetrahydrofuran were dried by distillation using a Na/benzophenone mixture. Carbon dioxide was purchased from Praxair in a 5.5 purity gas cylinder with 99.995% purity. All solid reagents were purchased (Sigma-Aldrich, Merck, and TCI Chemicals) and used as received. Unless otherwise noted, liquid chemicals were purchased from commercial suppliers (Sigma-Aldrich, Merck, and TCI Chemicals) and dried over molecular sieves (4 Å) prior to use. The molecular sieves (4 Å, Merck) were dried under vacuum at 250 °C for 24 h prior to use. During catalysis, we performed a freeze-pump-thaw cycle to remove dissolved gas from the J. Young pressure tube, and next, we waited

until the temperature reaches to room temperature. The  $^1\text{H}$  and  $^{13}\text{C}\{^1\text{H}\}$  NMR spectroscopic measurements were carried out using a JEOL ECS 400 MHz spectrometer or on a Bruker Avance 500 MHz spectrometer with residual undeuterated solvent as an internal standard.  $^{11}\text{B}$  NMR spectroscopy was performed using a Bruker Avance 500 MHz NMR spectrometer. Chemical shifts for  $^{11}\text{B}\{^1\text{H}\}$  NMR spectra were referenced using  $\text{Et}_2\text{O}\cdot\text{BF}_3$  as an external standard. Chemical shifts ( $\delta$ ) are given in ppm, and J values are given in Hz.

Mesoionic N-heterocyclic olefin, secondary amines (**2b-2h**), **6'** and **6** were synthesized according to the literature procedure.<sup>S1, S2, S3, S4</sup>

## II) Experimental Details

### Optimization study for N-methylation of secondary amines catalysed by mesoionic N-heterocyclic olefin

An oven-dried 25 mL Schlenk tube was charged with 0.2 mmol diphenylamine substrate and a magnetic stirring bar. It was kept under high vacuum for 2 h and was transferred into an argon-filled glove box. Inside the glove box, the required amount of mesoionic N-heterocyclic olefin (mNHO) catalyst, 0.8 mmol of different borane source and 0.5 mL anhydrous solvent were added to the reaction tube. Then the tube was sealed tightly with a screw cap equipped with a J. Young valve and removed from the glovebox. Subsequently, the reaction tube was connected through the Schlenk line and the mixture was degassed by two successive freeze-pump-thaw cycles and finally exposed to carbon dioxide (1 atm.). The flask was sealed and the final reaction mixture was allowed to stir for required time at a temperature mentioned in the optimization table below. After completion of the reaction, solvent was removed under reduced pressure and crude product was purified by column chromatography on silica gel (100-200 mesh) using hexane/ethyl acetate mixture (99:1 v/v) to yield the desired products. The product N-methyl diphenylamine (**3a**) was identified by  $^1\text{H}$  and  $^{13}\text{C}\{^1\text{H}\}$  NMR spectroscopy in  $\text{CDCl}_3$ . From this optimization study, it was established that 9-BBN is the best hydride source delivering the highest isolated yield of 95 % using 5 mol % of mNHO (**1**) under atmospheric pressure of  $\text{CO}_2$  at 40 °C in THF.

**Table S1. Mesoionic N-heterocyclic olefin catalysed N- methylation of amines using CO<sub>2</sub>**

<sup>a</sup>

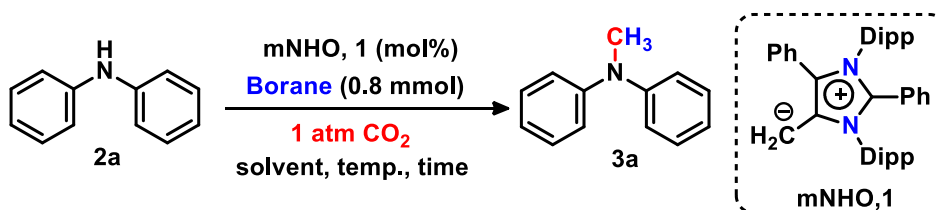

| Entry     | mNHO (mol%) | Borane                            | Solvent | Temp. (°C) | Time (h)  | Isolated Yield (%) |
|-----------|-------------|-----------------------------------|---------|------------|-----------|--------------------|
| 1.        | -           | 9-BBN                             | THF     | 40         | 24        | -                  |
| 2.        | 5           | -                                 | THF     | 40         | 24        | -                  |
| 3.        | 5           | 9-BBN                             | THF     | RT         | 24        | 78                 |
| <b>4.</b> | <b>5</b>    | <b>9-BBN</b>                      | THF     | <b>40</b>  | <b>24</b> | <b>95</b>          |
| 5.        | 5           | Me <sub>2</sub> S.BH <sub>3</sub> | THF     | 40         | 24        | 64                 |
| 6.        | 5           | HBPIn                             | THF     | 40         | 24        | -                  |
| 7.        | 5           | 9-BBN                             | Toluene | 40         | 24        | 82                 |
| 8.        | 5           | 9-BBN                             | THF     | 40         | 12        | 72                 |
| 9.        | 2.5         | 9-BBN                             | THF     | 40         | 24        | 65                 |
| 10.       | 3           | 9-BBN                             | THF     | 40         | 24        | 81                 |
| 11.       | 1           | 9-BBN                             | THF     | 40         | 24        | 34                 |

<sup>a</sup> Reaction conditions: amine (0.2 mmol), 1 atm CO<sub>2</sub>, borane (0.8 mmol), dry solvent (0.5 mL),.

**Experimental procedures for mesoionic N-heterocyclic olefin catalysed N-methylation of secondary amines**

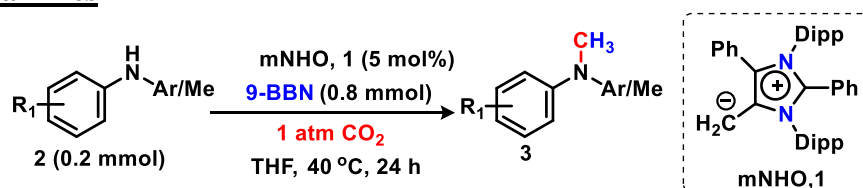

**Scheme S1.** General procedure for the N-methylation of secondary amines catalysed by mNHO (1).

Under an argon atmosphere, a 25 mL Schlenk tube equipped with a stir bar and a J. Young valve was charged with secondary amines (0.2 mmol), mNHO (5 mol%), 9-borabicyclo (3,3,1)nonane (9-BBN) (0.8 mmol) and THF (0.5 mL). The mixture was degassed by two successive freeze-pump-thaw cycles and exposed to carbon dioxide (1 atm.). The tube was sealed and stirred for 24 h at 40 °C. Next, the reaction mixture was dried using high vacuum pump and purified by column chromatography on silica gel (Merck, 100-200 mesh). The N-methyl diphenylamine was collected in analytically pure form using hexane-ethyl acetate mixture (99:1 v/v) as the eluent. The corresponding N-methyl diphenylamine was identified by  $^1\text{H}$  and  $^{13}\text{C}\{^1\text{H}\}$  NMR spectroscopy in  $\text{CDCl}_3$ .

### **Experimental procedures for mesoionic N-heterocyclic olefin catalysed double N-methylation of primary amines**

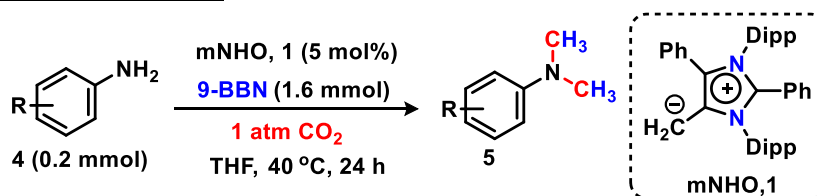

**Scheme S2.** General procedure for the N, N-dimethylation of primary amines catalysed by mNHO (1).

Under an argon atmosphere, a 25 mL Schlenk tube equipped with a stir bar and a J. Young valve was charged with primary amines (0.2 mmol), mNHO (5 mol%), 9-borabicyclo [3.3.1]nonane (9-BBN) (1.6 mmol) and THF (1 mL). The mixture was degassed by two successive freeze-pump-thaw cycles and exposed to carbon dioxide (1 atm.). The tube was sealed and stirred for 24 h at 40 °C. Then the reaction mixture was dried using high vacuum pump and purified by column chromatography on silica gel (Merck, 100-200 mesh). The N, N-dimethylaniline was then collected in analytically pure form using hexane-ethyl acetate mixture (99:1 v/v) as the eluent. The corresponding N, N-dimethylaniline was identified by  $^1\text{H}$  and  $^{13}\text{C}\{^1\text{H}\}$  NMR spectroscopy recorded in  $\text{CDCl}_3$ .

### **Preparation and characterization of reaction intermediate mNHO-9-BBN (10) adduct**

An oven-dried 25 mL Schlenk flask equipped with a stirring bar was charged with mesoionic N-heterocyclic olefin, **1** (277 mg, 0.50 mmol, 1 equiv), 9-BBN (0.50 mmol, 1 equiv) and toluene (10 mL) in an argon filled glovebox. Next, the reaction mixture was allowed to stir during 12 h at room temperature. After completion of the reaction, the solvent was dried

under reduced pressure and the final off white solid product was washed with hexane for three times to afford the mNHO-9BBN adduct **10** (62% yield). The colourless crystals were successfully grown from toluene under an argon atmosphere at -25 °C within one day. The compound **10** was characterized through SCXRD, as well as  $^1\text{H}$ ,  $^{13}\text{C}\{^1\text{H}\}$ , and  $^{11}\text{B}\{^1\text{H}\}$  NMR spectroscopies.

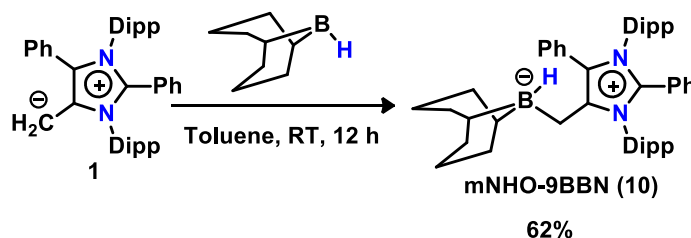

**Scheme S3.** Stoichiometric reaction between mNHO (**1**) and 9-BBN resulting in the formation of the adduct **10**.

$^1\text{H}$  NMR (500 MHz,  $\text{C}_6\text{D}_6$ : $\text{CD}_2\text{Cl}_2$ , 25 °C):  $\delta$  (ppm) = 7.82 (d, 2H, 8 Hz, Ar-H), 7.25 (t, 1H, 8Hz, Ar-H), 7.13-7.06 (m, 3H, Ar-H), 7.04-6.99 (m, 2H, Ar-H), 6.96-6.89 (m, 3H, Ar-H), 6.81 (d, 2H, 8Hz, Ar-H), 6.54 (t, 1H, 8 Hz, Ar-H), 6.46 (d, 2H, 8 Hz, Ar-H), 2.95-2.87 (m, 2H,  $\text{CH}(\text{CH}_3)_2$ ), 2.73-2.67 (m, 4H,  $\text{CH}(\text{CH}_3)_2$  and  $\text{CH}(9\text{-BBN})$ ), 2.60-2.50 (m, 5H,  $\text{CH}_2(9\text{-BBN})$ ), 2.32-2.21 (m, 2H,  $\text{CH}_2(9\text{-BBN})$ ), 2.11(s, 2H,  $\text{CH}_2\text{-B}$ ), 2.01-1.96 (m, 2H,  $\text{CH}_2(9\text{-BBN})$ ), 1.61 (d, 6H, 5 Hz,  $\text{CH}(\text{CH}_3)_2$ ), 0.91-.081 (m, 4H,  $\text{CH}_2(9\text{-BBN})$ ), 0.72 (d, 6H, 5Hz,  $\text{CH}(\text{CH}_3)_2$ ), 0.68-0.64 (dd, 12H, 8 Hz,  $\text{CH}(\text{CH}_3)_2$ );  $^{13}\text{C}\{^1\text{H}\}$  NMR (125 MHz,  $\text{C}_6\text{D}_6$ : $\text{THF-d}_8$ , 25 °C):  $\delta$  (ppm) = 151.4 (imidazole-C), 144.5 (Ar-C), 144.4 (Ar-C), 138.2 (imidazole-C), 130.9 (Ar-CH), 130.7 (Ar-CH), 130.3 (Ar-C), 130.1 (Ar-C), 129.9 (Ar-C), 129.7 (Ar-CH), 129.5 (Ar-CH), 129.1 (Ar-CH), 128.8 (Ar-CH), 128.1 (Ar-CH), 127.4 (Ar-CH), 126.0 (Ar-CH), 124.9 (Ar-CH), 125.6 (Ar-C), 122.5 (imidazole-C), 36.1  $\text{CH}(9\text{-BBN})$ , 32.6  $\text{CH}_2(9\text{-BBN})$ , 31.2 ( $\text{CH}(\text{CH}_3)_2$ ), 28.5 ( $\text{CH}(\text{CH}_3)_2$ ), 27.9 ( $\text{CH}(\text{CH}_3)_2$ ), 26.4 ( $\text{CH}_2(9\text{-BBN})$ ), 25.4 ( $\text{CH}_2(9\text{-BBN})$ ), 23.1 ( $\text{CH}(\text{CH}_3)_2$ ), 22.8 ( $\text{CH}(\text{CH}_3)_2$ ), 22.5 ( $\text{CH}(\text{CH}_3)_2$ ), 22.1 ( $\text{CH}_2\text{-B}$ );  $^{11}\text{B}\{^1\text{H}\}$  NMR (160 MHz,  $\text{C}_6\text{D}_6$ :  $\text{CD}_2\text{Cl}_2$ , 25 °C):  $\delta$  (ppm) = -11.3.

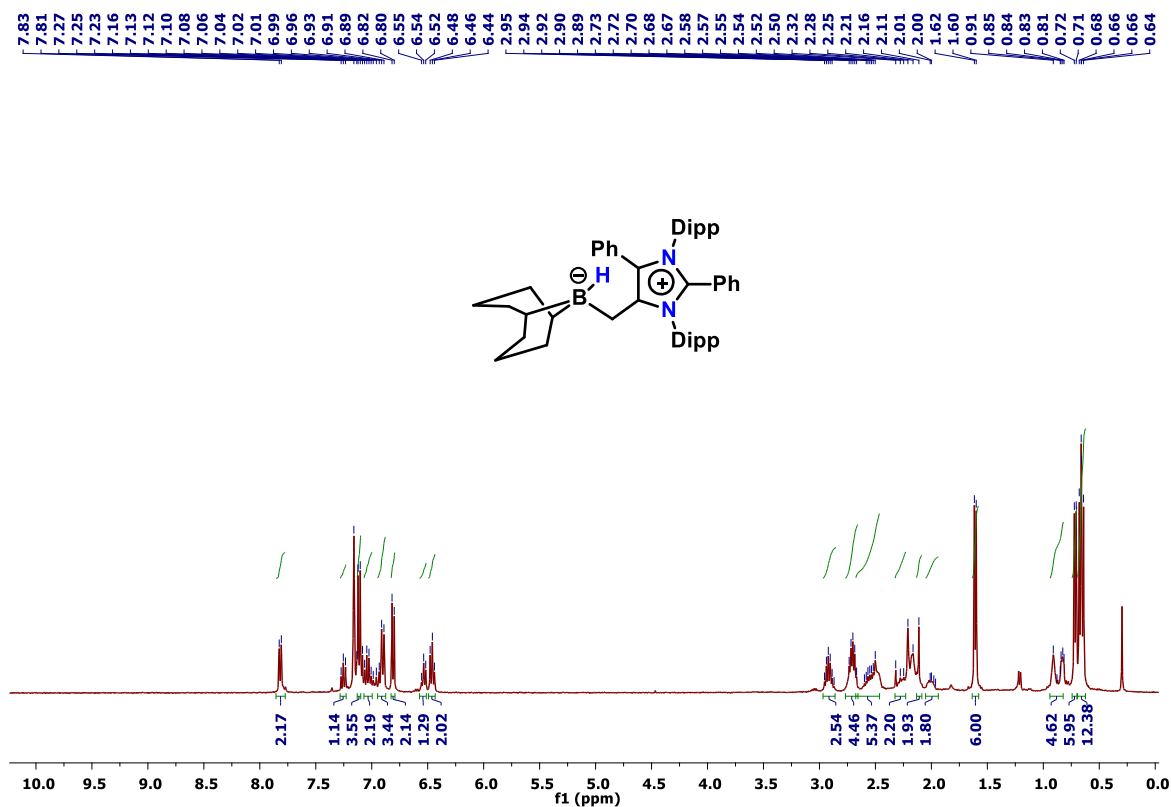

**Figure S1.** <sup>1</sup>H NMR spectrum of compound mNHO-9BBN adduct **10** in C<sub>6</sub>D<sub>6</sub>:CD<sub>2</sub>Cl<sub>2</sub> mixture.

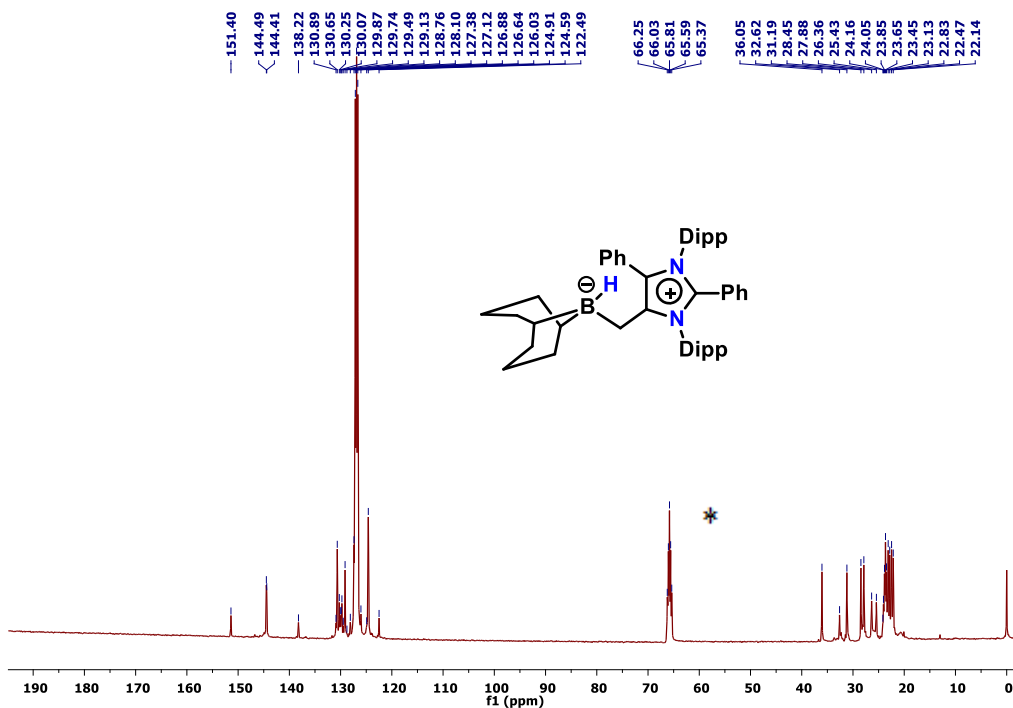

**Figure S2.** <sup>13</sup>C{<sup>1</sup>H} NMR spectrum of compound mNHO-9BBN adduct **10** in C<sub>6</sub>D<sub>6</sub>:THF-d<sub>8</sub> mixture. \* The signal at 65.3 to 66.2 ppm indicates the <sup>13</sup>C (2, 5) of THF-d<sub>8</sub>.

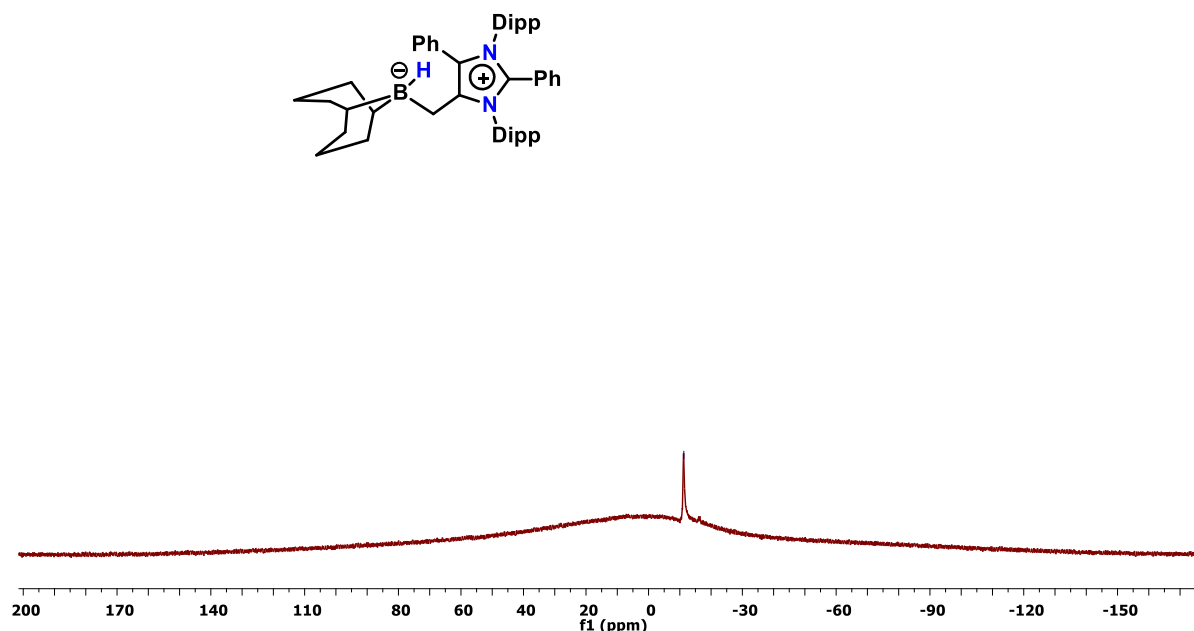

**Figure S3.**  $^{11}\text{B}\{^1\text{H}\}$  NMR spectrum of compound mNHO-9BBN adduct **10** in  $\text{C}_6\text{D}_6:\text{CD}_2\text{Cl}_2$  mixture.

### Characterization of reaction intermediate boron formate intermediate **11**

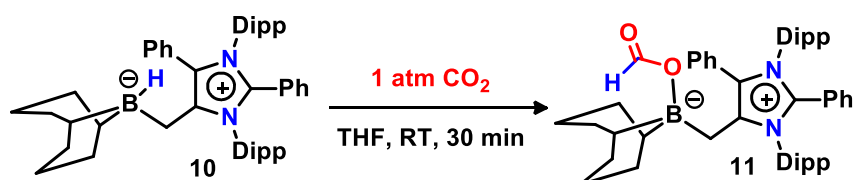

**Scheme S4.** Reaction between mNHO and 9-BBN under  $\text{CO}_2$  atmosphere.

An oven-dried 25 mL Schlenk flask equipped with a stirring bar was charged with the mesoionic N-heterocyclic olefin, **1** (55.5 mg, 0.10 mmol, 1 equiv), 9-BBN (0.10 mmol, 1 equiv) and THF (2 mL) in an argon filled glovebox. Next, the mixture was degassed by successive two freeze-pump-thaw cycles and exposed to carbon dioxide (1 atm.). The flask was sealed and allowed to stir during 30 min at room temperature. After completion of the reaction, the solvent was dried under reduced pressure and the white solid product was washed with hexane for three times to afford the boron formate (**11**). The compound **11** was characterized through  $^1\text{H}$ ,  $^{13}\text{C}\{^1\text{H}\}$ , and  $^{11}\text{B}\{^1\text{H}\}$  NMR spectroscopies.

**<sup>1</sup>H NMR** (500 MHz, C<sub>6</sub>D<sub>6</sub>:CD<sub>2</sub>Cl<sub>2</sub>, 25 °C): δ (ppm) = 8.67 (s, 1H, OCHO), 7.47 (d, 2H, 5 Hz, Ar-H), 7.23 (t, 1H, 8Hz, Ar-H), 7.22 (t, 1H, 8Hz, Ar-H), 7.09-7.07 (m, 3H, Ar-H), 7.02 (t, 2H, 8Hz, Ar-H), 6.97 (d, 1H, 5 Hz, Ar-H), 6.92 (d, 2H, 8Hz, Ar-H), 6.89 (d, 2H, 5Hz, Ar-H), 6.74-6.69 (m, 1H, Ar-H), 6.64 (t, 2H, 8 Hz, Ar-H), 2.98-2.90 (m, 2H, CH(CH<sub>3</sub>)<sub>2</sub>), 2.80-2.72 (m, 2H, CH(CH<sub>3</sub>)<sub>2</sub>), 2.19 (s, 2H, CH<sub>2</sub>-B), 2.09-1.96 (m, 3H, CH<sub>2</sub>-9BBN), 1.72-1.65 (m, 8H, CH<sub>2</sub>-9BBN), 1.45-1.44 (d, 6H, 5 Hz, CH(CH<sub>3</sub>)<sub>2</sub>), 1.28-1.21 (m, 3H, CH<sub>2</sub>-9BBN), 0.86 (d, 6H, 8 Hz, CH(CH<sub>3</sub>)<sub>2</sub>), 0.75 (dd, 12H, 5Hz, CH(CH<sub>3</sub>)<sub>2</sub>); **<sup>13</sup>C{<sup>1</sup>H} NMR** (125 MHz, C<sub>6</sub>D<sub>6</sub>:CD<sub>2</sub>Cl<sub>2</sub>, 25 °C): δ (ppm) = 166.3 (OCHO), 147.0 (imidazole-C), 146.8 (Ar-C), 146.0 (Ar-C), 142.4 (imidazole-C), 131.7 (Ar-CH), 131.6 (Ar-CH), 131.2 (Ar-C), 130.9 (Ar-C), 130.6 (Ar-C), 129.6 (Ar-CH), 129.2 (Ar-CH), 129.1 (Ar-CH), 128.9 (Ar-CH), 128.4 (Ar-CH), 128.4 (Ar-CH), 128.4 (Ar-CH), 125.9 (Ar-CH), 125.6 (Ar-C), 123.4 (imidazole-C), 33.3 (CH<sub>2</sub>-9BBN), 32.0 (CH<sub>2</sub>-9BBN), 31.7 (CH(CH<sub>3</sub>)<sub>2</sub>), 29.1 (CH(CH<sub>3</sub>)<sub>2</sub>), 28.8 (CH(CH<sub>3</sub>)<sub>2</sub>), 25.3 (CH(CH<sub>3</sub>)<sub>2</sub>), 24.2 (CH(CH<sub>3</sub>)<sub>2</sub>), 24.1 (CH(CH<sub>3</sub>)<sub>2</sub>), 23.1 (CH-9BBN), 14.3 (CH<sub>2</sub>-B); **<sup>11</sup>B{<sup>1</sup>H} NMR** (160 MHz, C<sub>6</sub>D<sub>6</sub>:CD<sub>2</sub>Cl<sub>2</sub>, 25 °C): δ (ppm) = 8.1.

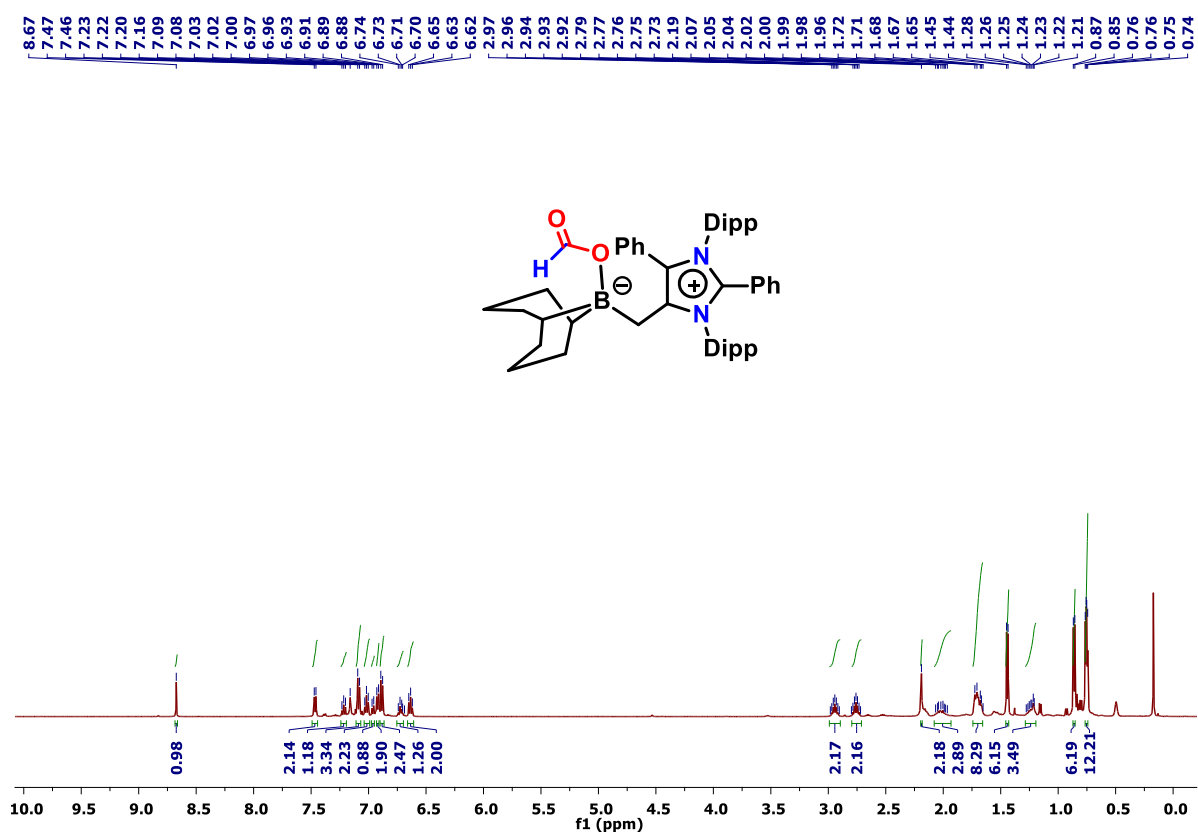

**Figure S4.** <sup>1</sup>H NMR spectrum of compound boron formate **11** in C<sub>6</sub>D<sub>6</sub>:CD<sub>2</sub>Cl<sub>2</sub> mixture.



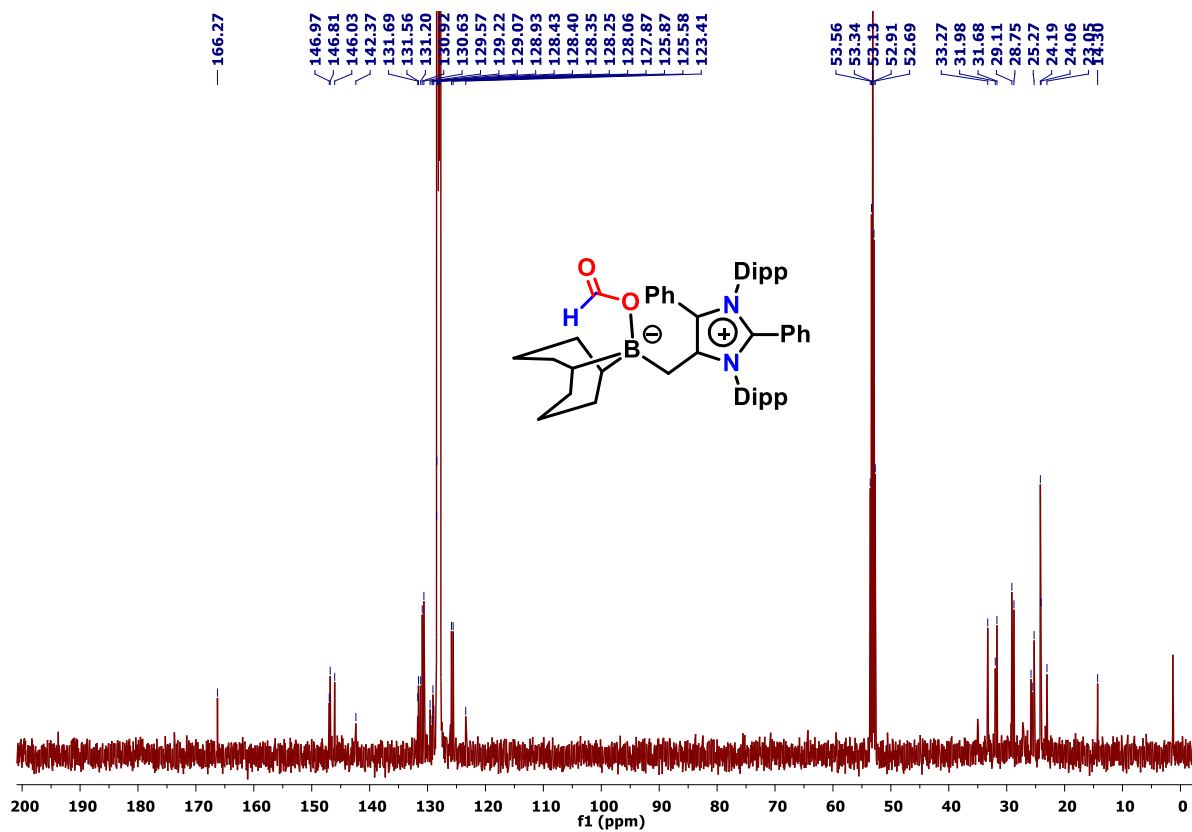

**Figure S5.**  $^{13}\text{C}\{^1\text{H}\}$  NMR spectrum of compound boron formate **11** in  $\text{C}_6\text{D}_6:\text{CD}_2\text{Cl}_2$  mixture.

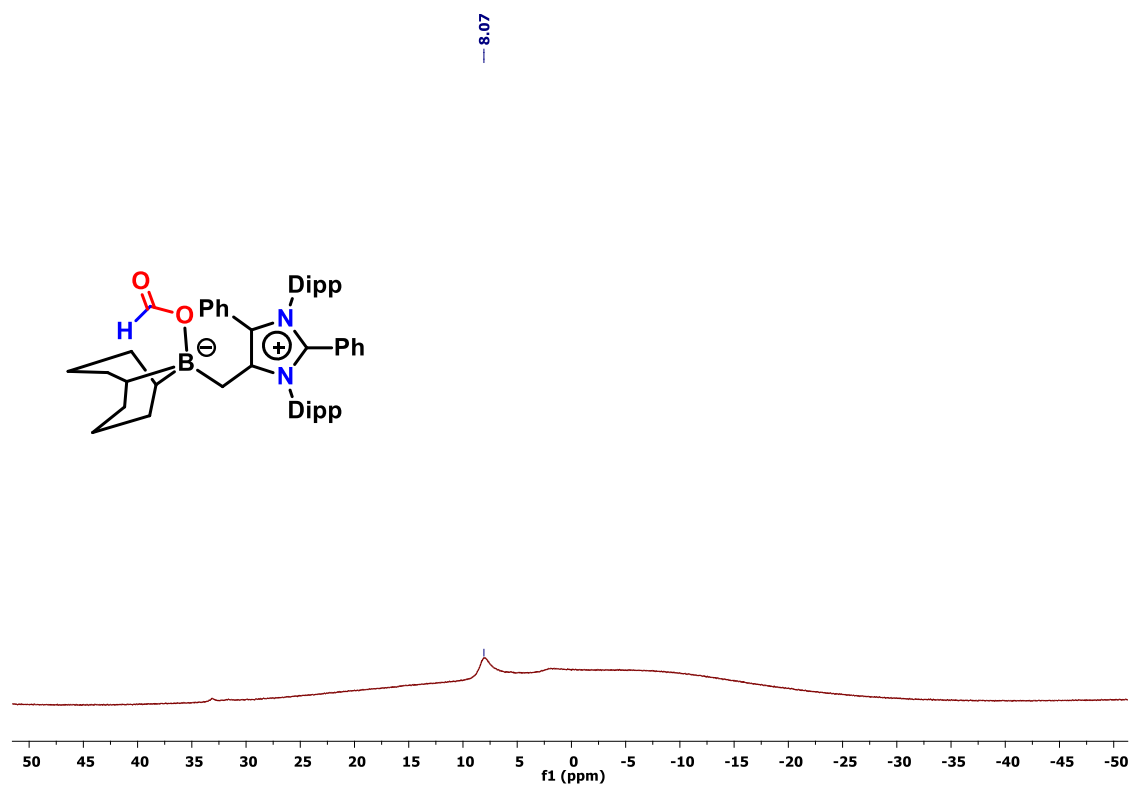

**Figure S6.**  $^{11}\text{B}\{^1\text{H}\}$  NMR spectrum of compound boron formate **11** in  $\text{C}_6\text{D}_6:\text{CD}_2\text{Cl}_2$  mixture.

## H<sub>2</sub> evolution experiment

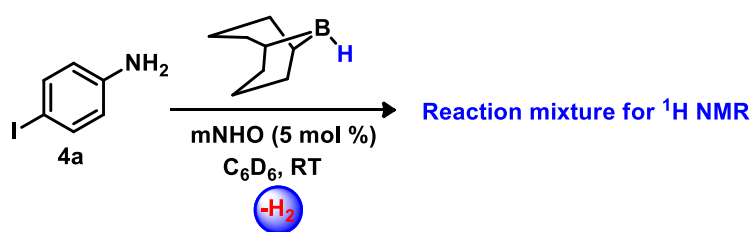

**Scheme S5.** Reaction of amine, 9-BBN and mNHO in benzene-d<sub>6</sub> at room temperature during 10 min.

Under an argon atmosphere, a 2.5 mL screw cap NMR tube was charged with 4-iodo aniline (5.48 mg, 0.025 mmol, 1 equiv.), mNHO (5 mol%), 9-BBN (1 equiv.) and benzene-d<sub>6</sub> (0.6 mL). During the addition of 9-BBN at room temperature, we observed an immediate evolution of a gas which was characterized through <sup>1</sup>H NMR ( $\delta = 4.47$  ppm) spectroscopy and GC analysis.

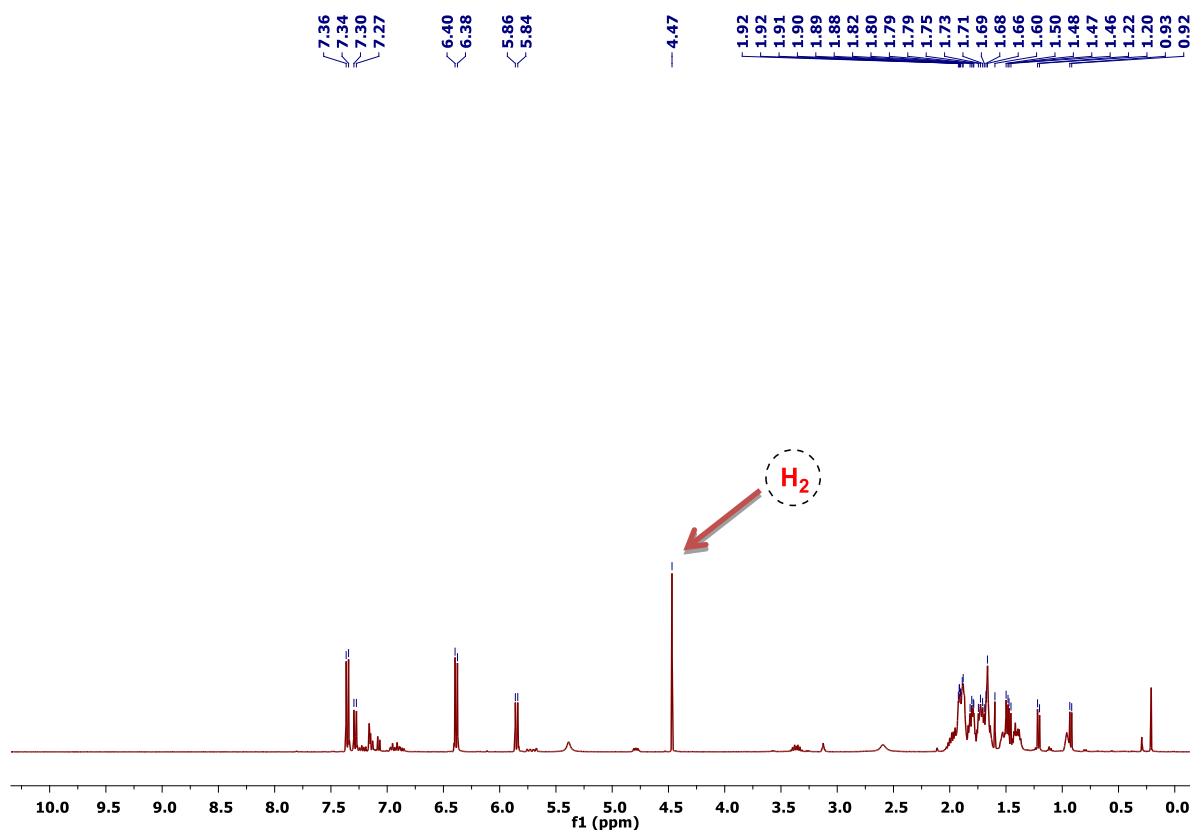

**Figure S7.** <sup>1</sup>H NMR spectrum of the reaction mixture (4-iodo aniline, 9-BBN, and mNHO in benzene-d<sub>6</sub> at room temperature) using a screw cap NMR tube.<sup>S5</sup>

Software Version : 6.3.4.0700  
Sample Name :  
Instrument Name : Clarus 590  
Rack/Vial : 0/0  
Sample Amount : 1.000000  
Cycle : 1

Date : 10-02-2021 19:03:57  
Data Acquisition Time : 10-02-2021 14:51:09  
Channel : B  
Operator : IISER  
Dilution Factor : 1.000000

Result File : C:\TurboMass\TcWS\Ver6.3.4\Examples\Installation\Sample D2 check.rst  
Sequence File : C:\TurboMass\TcWS\Ver6.3.4\Examples\Sample D2 check.seq

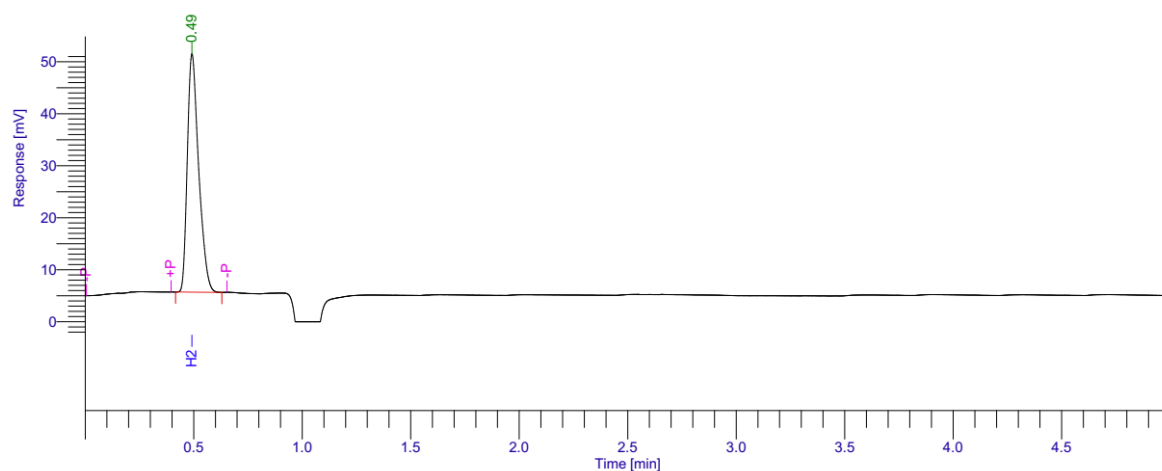

## GC REPORT

| Peak # | Component Name | Time [min] | Area [uV*sec] | Height [uV] |
|--------|----------------|------------|---------------|-------------|
| 1      | H2             | 0.492      | 166641.25     | 45871.26    |
|        |                |            | 166641.25     | 45871.26    |

**Figure S8.** Retention time graph of the reaction mixture (4-iodo aniline, 9-BBN, and mNHO in benzene-d<sub>6</sub> in room temperature) in gas chromatography confirming H<sub>2</sub> evolution.

### Characterization of reaction intermediate borylamine using 4-iodo aniline substrate

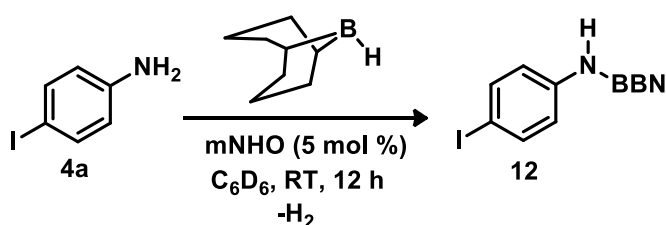

**Scheme S6.** Reaction of 4-iodo aniline, 9-BBN and mNHO in benzene-d<sub>6</sub> at room temperature during 12 h.

An oven-dried 25 mL Schlenk tube equipped with a stirring bar and was charged with 4-iodo aniline (21.9 mg, 0.10 mmol, 1 equiv.), mNHO (5 mol %), 9-BBN (1 equiv.) and benzene-d<sub>6</sub> (0.6 mL) in an argon filled glovebox. Next, the reaction mixture was allowed to stir during 12 h at room temperature. After completion of the reaction, the formation of borylamine **12** was characterized by <sup>1</sup>H and <sup>13</sup>C{<sup>1</sup>H} NMR spectroscopies.

<sup>1</sup>H NMR (400 MHz, C<sub>6</sub>D<sub>6</sub>, 25 °C): δ (ppm) = 7.35 (d, 2H, 8Hz, Ar-H), 6.41 (d, 1H, 12Hz, Ar-H), 5.45 (b, 1H, NH) 1.88-1.76 (m, 8H, CH<sub>2</sub>-BBN), 1.75-1.68 (m, 3H, CH<sub>2</sub>-BBN), 1.44-1.36 (m, 3H, CH<sub>2</sub> and CH-BBN); <sup>13</sup>C{<sup>1</sup>H} NMR (100 MHz, C<sub>6</sub>D<sub>6</sub>, 25 °C): δ (ppm) = 143.4 (Ar-C), 138.1 (Ar-CH), 124.9 (Ar-CH), 86.5 (Ar-C), 34.0 (CH, BBN), 33.2 (CH<sub>2</sub>, BBN), 23.8 (CH<sub>2</sub>, BBN).

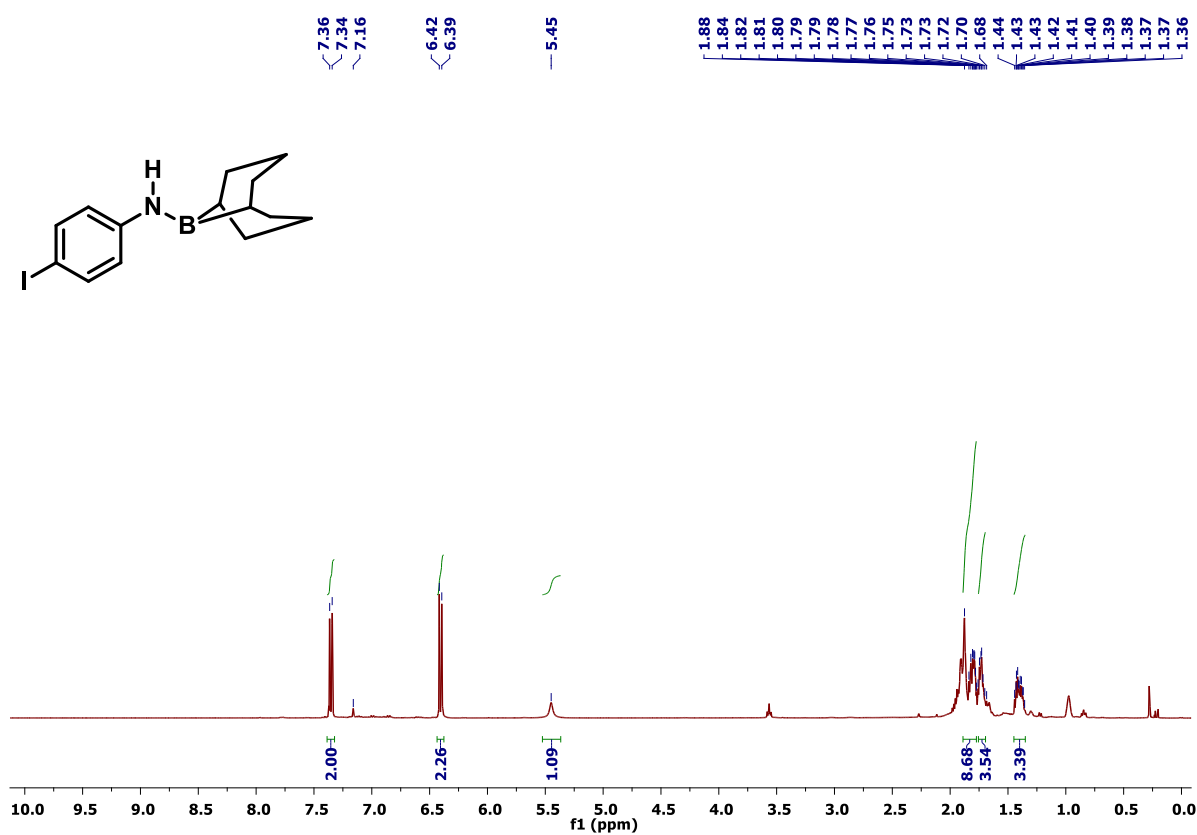

**Figure S9.** <sup>1</sup>H NMR spectrum of the reaction mixture after 12 h (4-iodo aniline, 9-BBN, and mNHO in benzene-d<sub>6</sub> at room temperature).<sup>S6</sup>

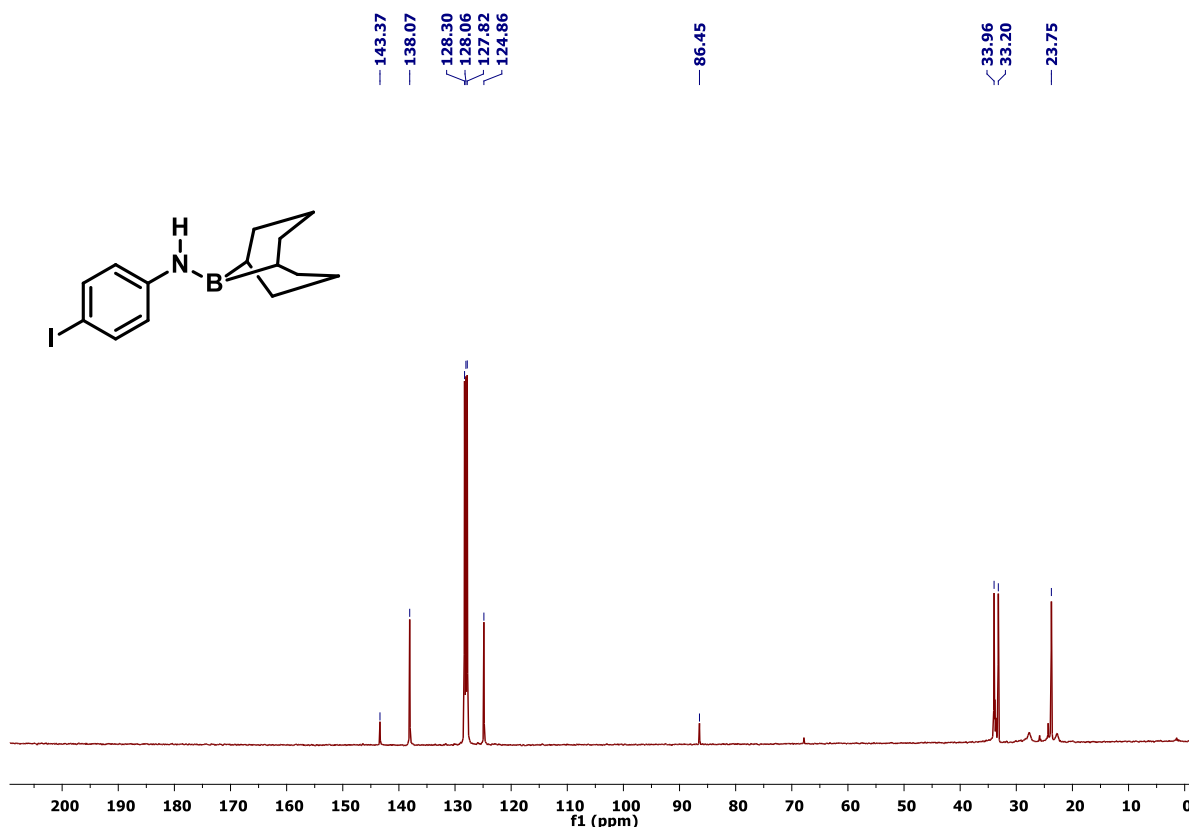

**Figure S10.**  $^{13}\text{C}\{^1\text{H}\}$  NMR spectrum of the reaction mixture (4-iodo aniline, 9-BBN and mNHO in benzene- $\text{d}_6$  at room temperature)<sup>S6</sup>.

### Characterization of reaction intermediate N-borylatedamine

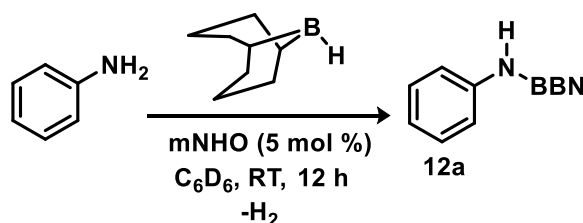

**Scheme 7.** Reaction of aniline, 9-BBN and mNHO in benzene- $\text{d}_6$  at room temperature during 12 h.

An oven-dried 25 mL Schlenk tube equipped with a stirring bar was charged with 0.5 mmol aniline (21.9 mg, 1 equiv.), mNHO (5 mol %), 9-BBN (1 equiv.) and benzene- $\text{d}_6$  (0.8 mL) in an argon filled glovebox. Next, the reaction mixture was allowed to stir during 12 h at room temperature. After completion of the reaction, the formation of borylamine **12a** was characterized by  $^1\text{H}$ ,  $^{13}\text{C}\{^1\text{H}\}$  and  $^{11}\text{B}\{^1\text{H}\}$  NMR spectroscopies.

$^1\text{H}$  NMR (400 MHz,  $\text{C}_6\text{D}_6$ , 25 °C):  $\delta$  (ppm) = 7.13-7.04 (m, 2H, Ar-H), 6.93-6.87 (m, 2H, Ar-H), 6.35 (d, 1H, 8Hz, Ar-H), 5.67 (b, 1H, NH) 2.00-1.76 (m, 11H,  $\text{CH}_2$ ), 1.48-1.41 (m, 2H, CH), 1.02-1.01 (m, 1H,  $\text{CH}_2$ );  $^{13}\text{C}\{^1\text{H}\}$  NMR (100 MHz,  $\text{C}_6\text{D}_6$ , 25 °C):  $\delta$  (ppm) = 143.5 (Ar-C), 129.1 (Ar-CH) 128.8 (Ar-CH), 123.0 (Ar-CH), 122.5 (Ar-CH), 33.7 (CH), 32.9 ( $\text{CH}_2$ ), 23.5 ( $\text{CH}_2$ ).  $^{11}\text{B}\{^1\text{H}\}$  NMR (160 MHz,  $\text{C}_6\text{D}_6$ , 25 °C):  $\delta$  (ppm) = 50.3.

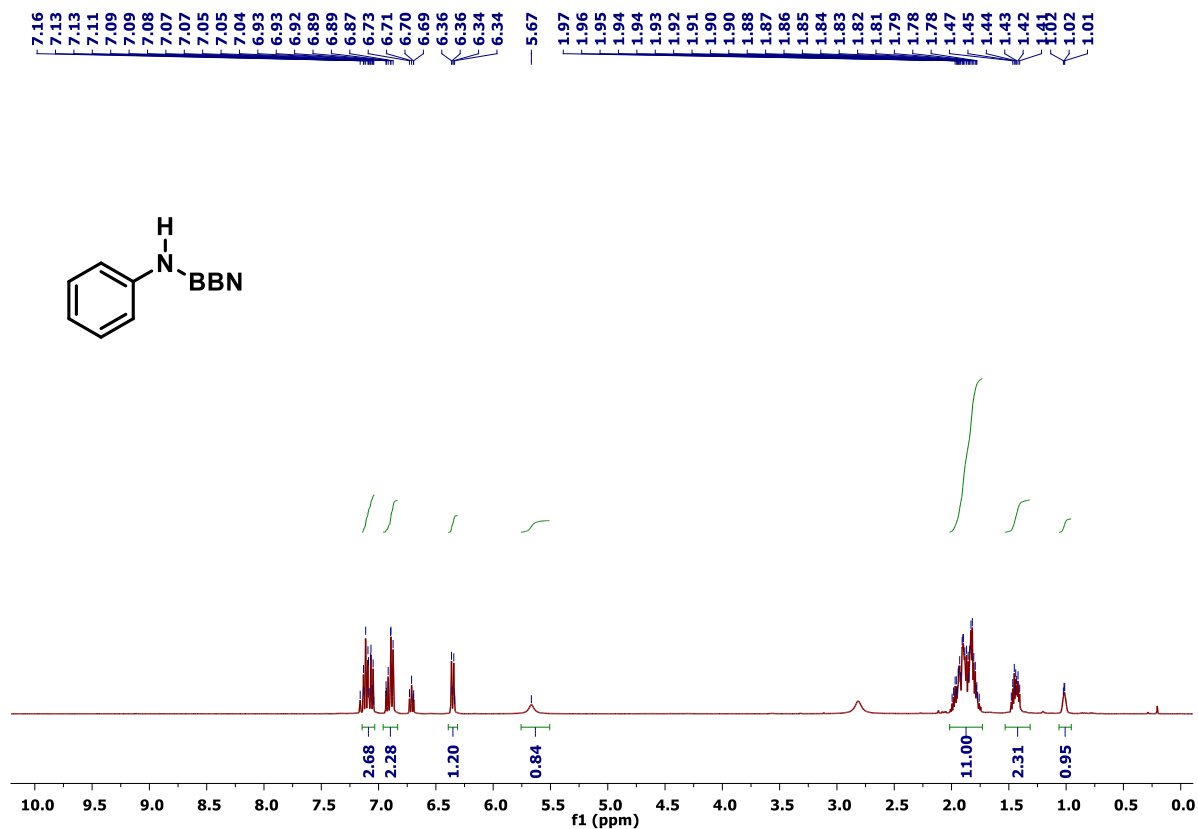

**Figure S11.**  $^1\text{H}$  NMR spectrum of the reaction mixture (aniline, 9-BBN, and mNHO in benzene- $\text{d}_6$  at room temperature).<sup>S6</sup>

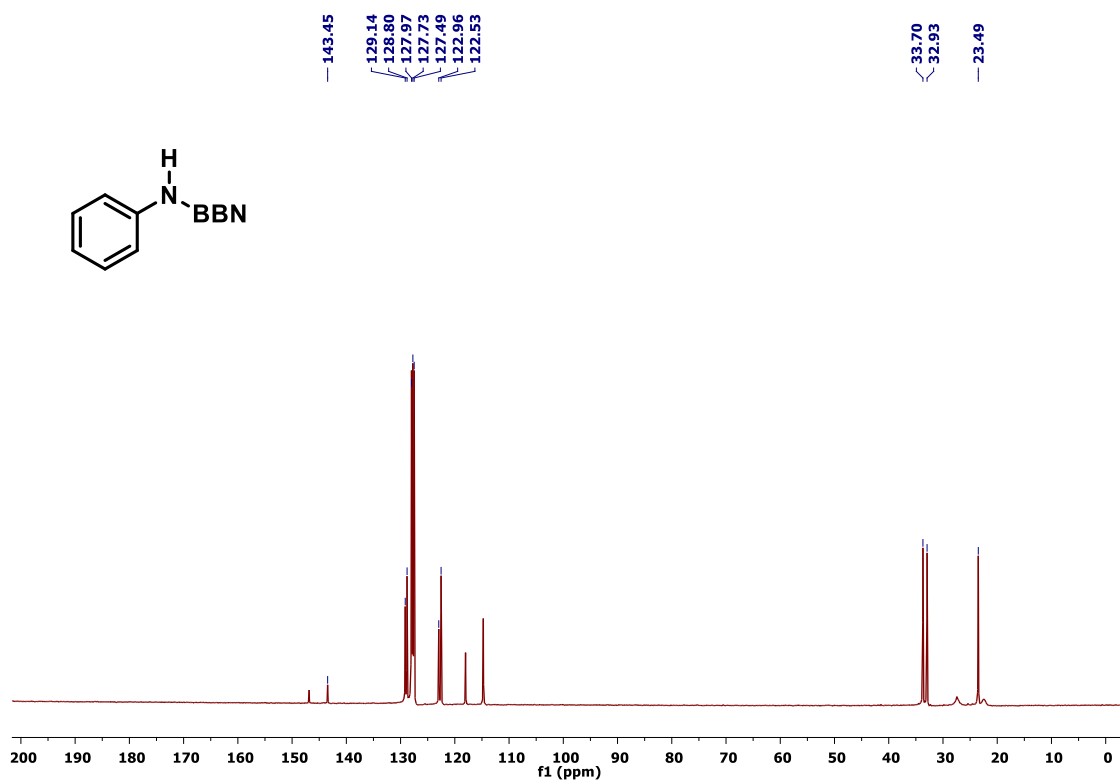

**Figure S12.**  $^{13}\text{C}\{^1\text{H}\}$  NMR spectrum of the reaction mixture (aniline, 9-BBN and mNHO in benzene- $\text{d}_6$  at room temperature) <sup>S6</sup>.

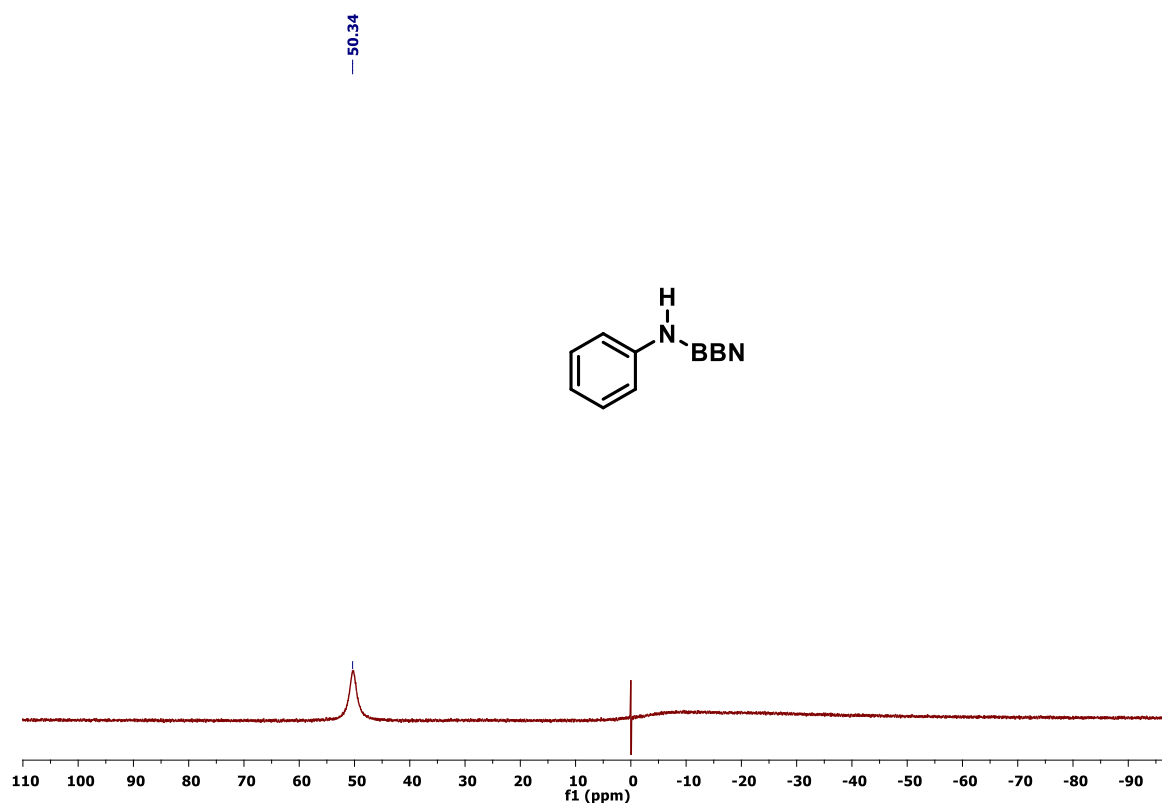

**Figure S13.**  $^{11}\text{B}\{^1\text{H}\}$  NMR spectrum of the reaction mixture (aniline, 9-BBN and mNHO in benzene- $\text{d}_6$  at room temperature) <sup>S6</sup>.

### Control reactions:

- a) mNHO-9BBN adduct (10) catalysed N, N-dimethylation of 4-iodo aniline using CO<sub>2</sub> and 9BBN: As a proof to establish the adduct 10 is catalytically active species

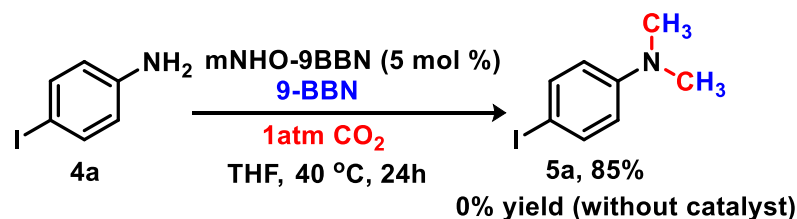

**Scheme S8.** N, N-dimethylation of 4-iodo aniline catalysed by mNHO-9BBN adduct **10**.

An oven-dried 25 mL Schlenk tube was charged with 0.2 mmol 4-iodo aniline substrate and a magnetic stirring bar. It was kept under high vacuum for 2 h and was transferred into an argon-filled glovebox. Inside the glovebox, mNHO-9BBN adduct (5 mol %), 9-BBN (1.6 mmol) and anhydrous THF (1 mL) were added to the reaction tube. Next, the tube was sealed tightly with a screw cap equipped with a J. Young valve and removed from the glovebox. After that, the reaction tube was connected through the Schlenk line and the mixture was degassed by successive two freeze-pump-thaw cycles and exposed to carbon dioxide (1 atm.). Subsequently, the flask was sealed and stirred for 24 h at 40 °C. After completion of the reaction, the solvent was removed by vacuum and the compound was purified by column chromatography on silica gel with hexane and ethyl acetate mixture (99: 1 v/v) as eluent. The corresponding product was identified by <sup>1</sup>H and <sup>13</sup>C{<sup>1</sup>H} NMR spectroscopy in CDCl<sub>3</sub>.

Yellow liquid (85%)<sup>S7</sup>; <sup>1</sup>H NMR (400 MHz, CDCl<sub>3</sub>, 25 °C): δ (ppm) = 7.47 (d, 2H, 8 Hz, Ar-H), 6.49 (d, 2H, 8 Hz, Ar-H), 2.92 (s, 6H, N(CH<sub>3</sub>)<sub>2</sub>); <sup>13</sup>C{<sup>1</sup>H} NMR (100 MHz, CDCl<sub>3</sub>, 25 °C): δ (ppm) = 150.0 (Ar-C), 137.5 (Ar-CH), 114.7 (Ar-CH), 77.4 (Ar-C), 40.4 N(CH<sub>3</sub>)<sub>2</sub>.

- b) mNHO catalysed N, N-dimethylation of 4-iodo borylamine (12) using CO<sub>2</sub> and 9BBN: As a proof to establish the 4-iodo N-borylatedamine 12 is an active intermediate species

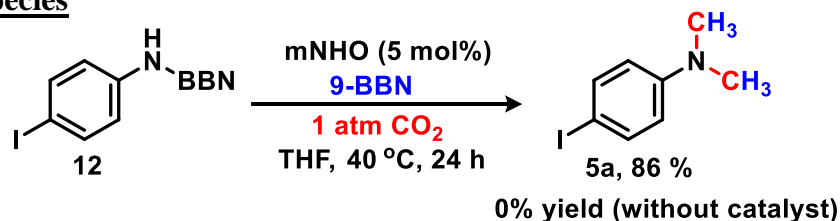

**Scheme S9.** N, N-dimethylation of 4-iodo borylamine catalysed by mNHO.



An oven-dried 25 mL Schlenk tube equipped with a stirring bar was charged with 4-iodoaniline (43.8 mg, 0.2 mmol, 1 equiv.), mNHO (5 mol %), 9-BBN (1 equiv.) and THF (1 mL) in argon filled glove box. Next, the reaction mixture was allowed to stir during 12 h at room temperature. After completion of the reaction, the solvent was removed by vacuum and the semi-liquid borylamine (**12**) was transferred to the glove box. After that, 9-BBN (1.6 mmol) and anhydrous THF (1 mL) were added to the reaction tube. Subsequently the tube was sealed tightly with a screw cap equipped with a J. Young valve and removed from the glove box. Next, the reaction tube was connected through the Schlenk line and the mixture was degassed by successive two freeze-pump-thaw cycles and exposed to carbon dioxide (1 atm.) and was stirred for 24 h at 40 °C. After completion of the reaction, the solvent was removed by vacuum and the compound was purified by column chromatography on silica gel with hexane and ethyl acetate mixture (99: 1 v/v) as eluent. The corresponding product was identified by <sup>1</sup>H and <sup>13</sup>C{<sup>1</sup>H} NMR spectroscopy in CDCl<sub>3</sub>. Yellow liquid (86%)<sup>S7</sup>; <sup>1</sup>H NMR (400 MHz, CDCl<sub>3</sub>, 25 °C): δ (ppm) = 7.47 (d, 2H, 8 Hz, Ar-H), 6.49 (d, 2H, 8 Hz, Ar-H), 2.92 (s, 6H, N(CH<sub>3</sub>)<sub>2</sub>); <sup>13</sup>C{<sup>1</sup>H} NMR (100 MHz, CDCl<sub>3</sub>, 25 °C): δ (ppm) = 150.0 (Ar-C), 137.5 (Ar-CH), 114.7 (Ar-CH), 77.4 (Ar-C), 40.4 (N(CH<sub>3</sub>)<sub>2</sub>).

c) **mNHO catalysed reduction of formanilide (**13**) to N-methyl amine using 9-BBN: As a proof of N-formyl intermediate during the reaction**

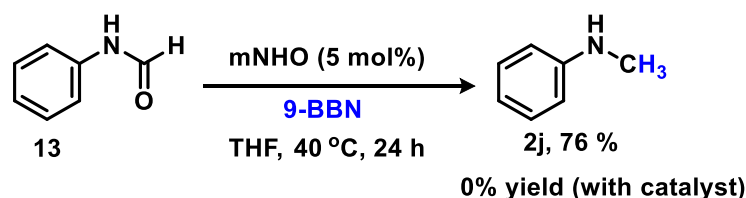

**Scheme S10.** Reduction of formanilide catalysed by mNHO.

An oven-dried 25 mL Schlenk tube equipped with a stirring bar and was charged with formanilide (43.8 mg, 0.2 mmol, 1 equiv.), mNHO (5 mol %), 9-BBN (2.5 equiv.) and THF (0.5 mL) in an argon filled glovebox. Then the reaction mixture was allowed to stir at 40 °C during 24 h. After completion of the reaction, the solvent was removed by vacuum and the compound was purified by column chromatography on silica gel with hexane and ethyl acetate mixture (99: 1 v/v) as eluent. The desired product was identified by <sup>1</sup>H and <sup>13</sup>C{<sup>1</sup>H} NMR spectroscopy in CDCl<sub>3</sub>.

Yellow liquid (76%);<sup>S8</sup> <sup>1</sup>H NMR (400 MHz, CDCl<sub>3</sub>, 25 °C): δ (ppm) = 7.33 (t, 2H, 8 Hz, Ar-H), 6.85 (t, 1H, 8 Hz, Ar-H), 6.72 (d, 2H, 8 Hz, Ar-H), 3.66 (b, 1H, NH), 2.90 (s, 3H,

NHCH<sub>3</sub>); <sup>13</sup>C{<sup>1</sup>H} NMR (100 MHz, CDCl<sub>3</sub>, 25 °C): δ (ppm) = 149.2 (Ar-C), 129.0 (Ar-CH), 117.0 (Ar-CH), 112.2 (Ar-CH), 30.5 (NHCH<sub>3</sub>).

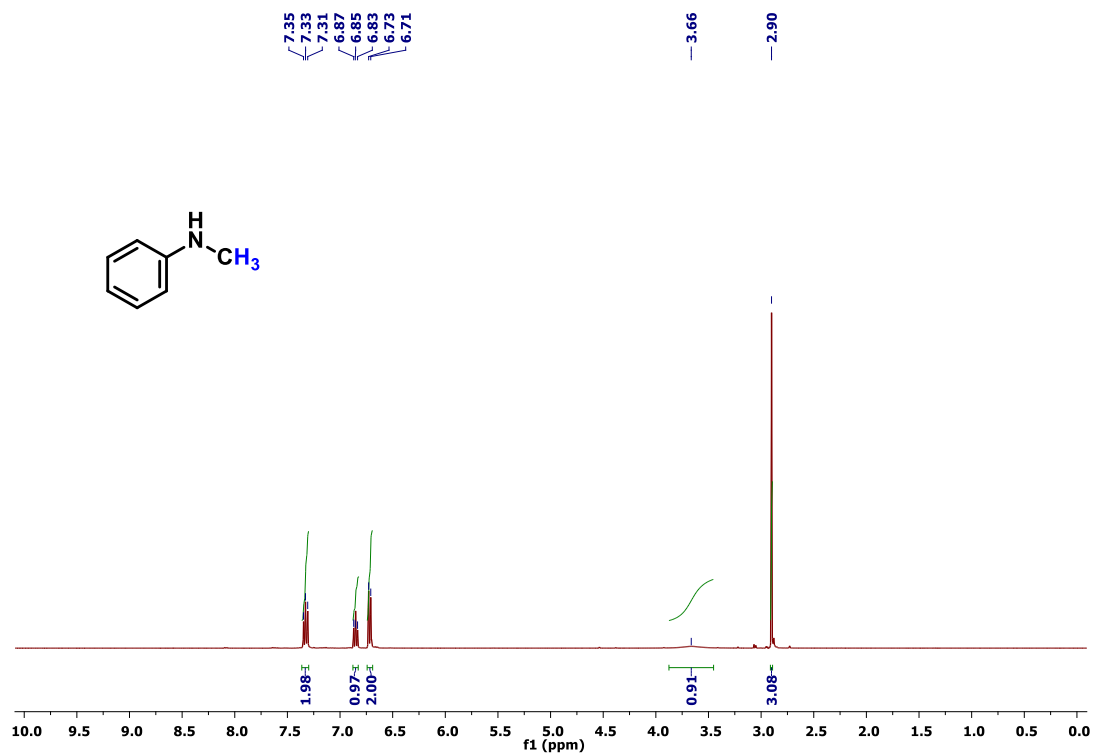

Figure S14. <sup>1</sup>H NMR spectrum of N-methyl aniline in CDCl<sub>3</sub>.<sup>S8</sup>

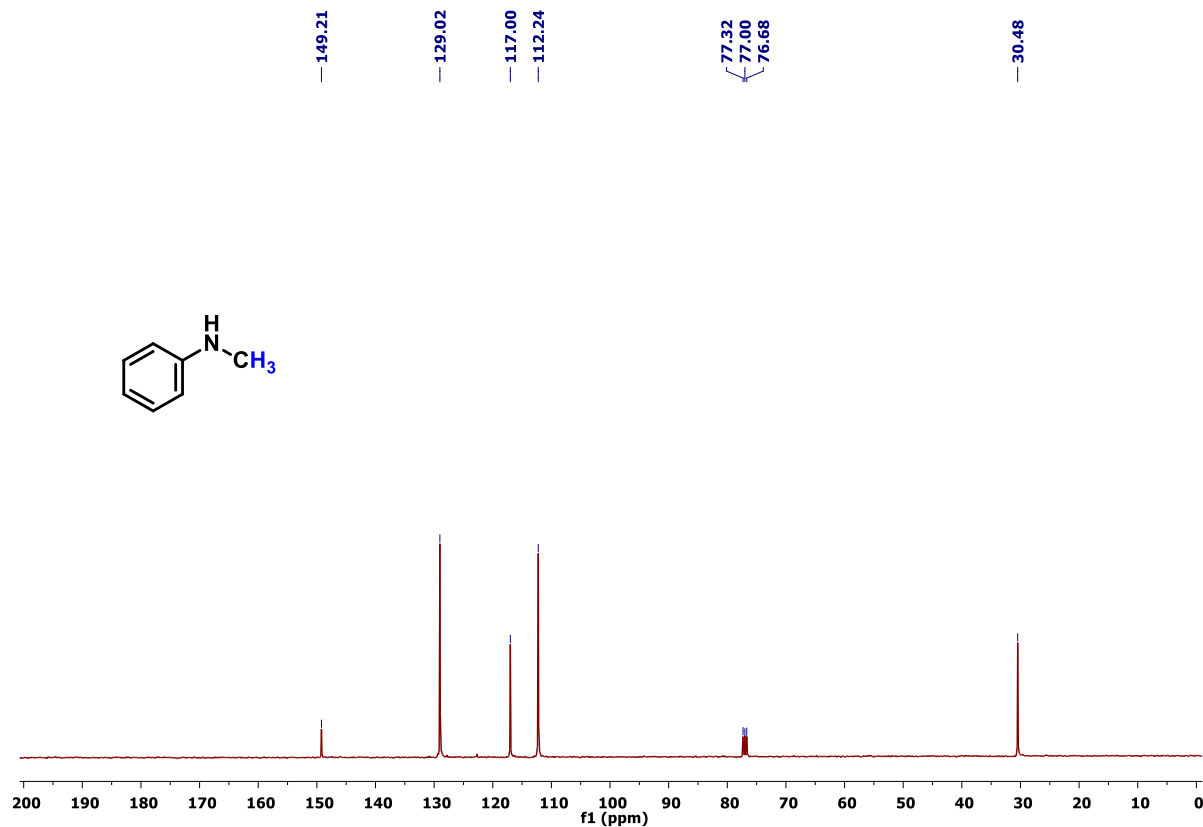

Figure S15. <sup>13</sup>C{<sup>1</sup>H} NMR spectrum of the N-methyl aniline in CDCl<sub>3</sub>.<sup>S8</sup>

d) Reaction of 9-BBN with CO<sub>2</sub> in absence of catalyst mNHO

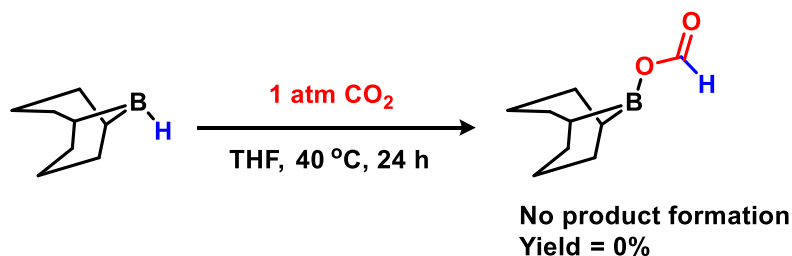

*Scheme S11.* Reaction between 9-BBN and CO<sub>2</sub> in THF at 40 °C.

An oven-dried 25 mL Schlenk tube equipped with a stirring bar was charged with 0.2 mmol 9-BBN (24.5 mg) and THF (0.5 mL) in an argon filled glovebox. The mixture was degassed by two successive freeze-pump-thaw cycles and exposed to carbon dioxide (1 atm.). Then the reaction mixture was allowed to stir at 40 °C for 24h. After completion of the reaction, the solvent was removed by vacuum. The resulting reaction mixture was dissolved in C<sub>6</sub>D<sub>6</sub> and formation of boron-formate was not observed in proton NMR spectrum. This experiment supports the fact that uncatalyzed reaction is not feasible for this step.

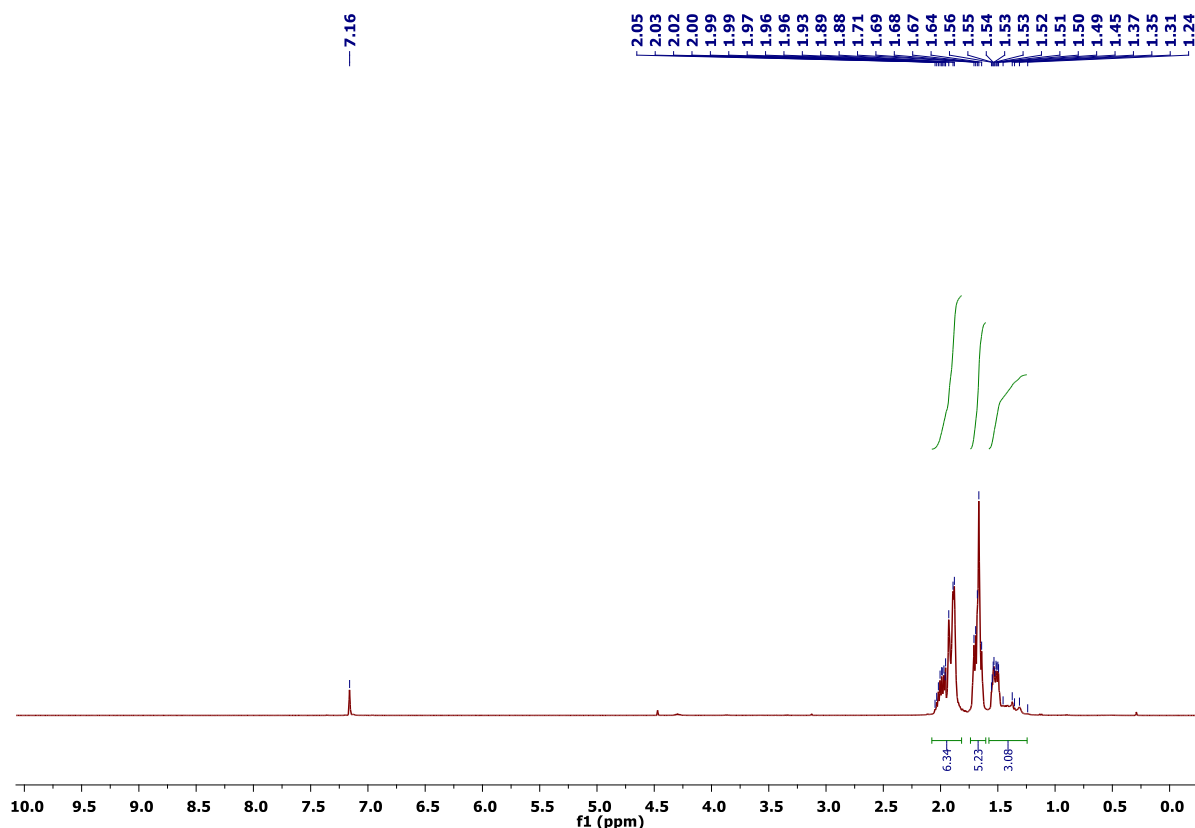

*Figure S16.* <sup>1</sup>H NMR spectrum of the reaction mixture at 40 °C (9-BBN and CO<sub>2</sub> in benzene-d<sub>6</sub>).

e) Reaction of 4-iodoaniline-BBN and 9-BBN with CO<sub>2</sub> in absence of catalyst mNHO

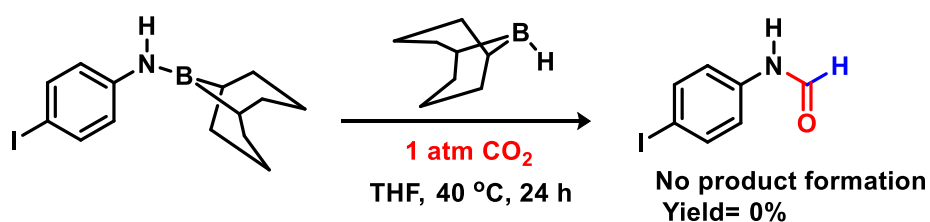

*Scheme S12.* Reaction between 4-Iodoaniline-BBN and 9-BBN with CO<sub>2</sub> in THF at 40 °C.

An oven-dried 25 mL Schlenk tube equipped with a stirring bar was charged with 0.2 mmol 4-iodoaniline-BBN (67.8 mg), 9-BBN (24.5 mg, 1 equiv.) and THF (0.5 mL) in an argon filled glovebox. The mixture was degassed by two successive freeze-pump-thaw cycles and exposed to carbon dioxide (1 atm.). Next, the reaction mixture was allowed to stir at 40 °C for 24h. After completion of the reaction, the solvent was removed by vacuum. The resulting reaction mixture was dissolved in C<sub>6</sub>D<sub>6</sub> and formation of N-formyl 4-iodoaniline was not observed in proton NMR spectrum. This experiment further supports involvement of catalyst during this step.

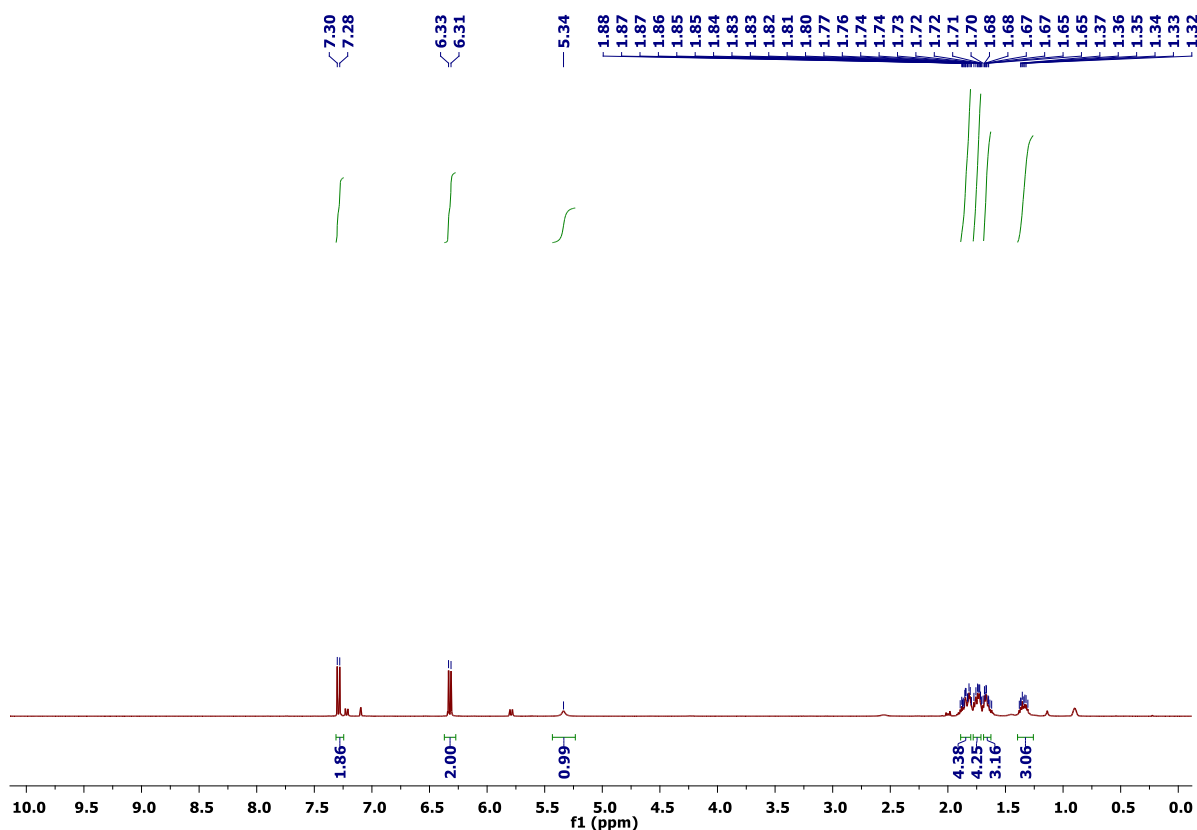

*Figure S17.* <sup>1</sup>H NMR spectrum of the reaction mixture after 24h at 40 °C (4-iodo-BBN, 9-BBN and CO<sub>2</sub> in benzene-d<sub>6</sub>).

f) **Reaction of 4-iodoaniline-BBN (12) and mNHO-BBN formate (11): Formyl Transfer**

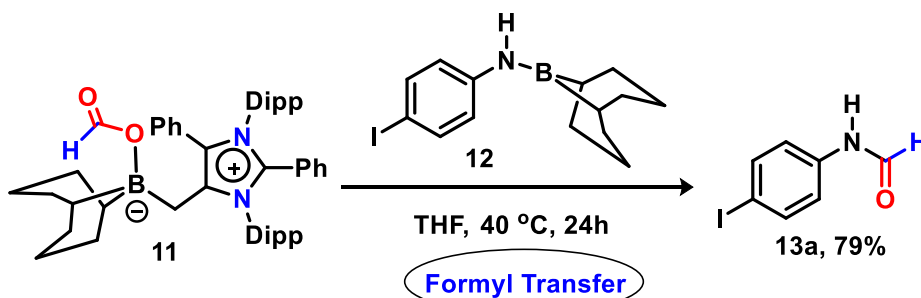

*Scheme S13.* Reaction between 4-Iodoaniline-BBN and mNHO-BBN formate in THF at 40 °C.

An oven-dried 25 mL Schlenk tube equipped with a stirring bar was charged with 0.05 mmol 4-iodoaniline-BBN **12** (17 mg), mNHO-BBN formate **11** (36 mg, 1 equiv.) and THF (0.5 mL) in an argon filled glovebox. Next, the reaction mixture was allowed to stir at 40 °C for 24h. After completion of the reaction, the solvent was removed by vacuum. The reaction mixture was dried using high vacuum pump and pass through by column chromatography on silica gel (Merck, 100-200 mesh) using hexane-ethyl acetate mixture (70:30 v/v) as an eluent. The corresponding N-formylated product was identified by  $^1\text{H}$  and  $^{13}\text{C}\{^1\text{H}\}$  NMR spectroscopies in  $\text{CDCl}_3$ .

Brown Solid (79%);  $^1\text{H}$  NMR (400 MHz,  $\text{CDCl}_3$ , 25 °C):  $\delta$  (ppm) = 8.65 (d, 8 Hz, 0.51H), 8.35 (d, 0.62H), 7.65-7.60 (m, 2H), 7.31 (d, 2H, 8 Hz, Ar-H), 6.83 (d, 1H, 8 Hz);  $^{13}\text{C}\{^1\text{H}\}$  NMR (100 MHz,  $\text{CDCl}_3$ , 25 °C):  $\delta$  (ppm) = 162.3, 159.0, 138.7, 138.0, 136.5, 121.7, 120.4, 88.7, 88.1.

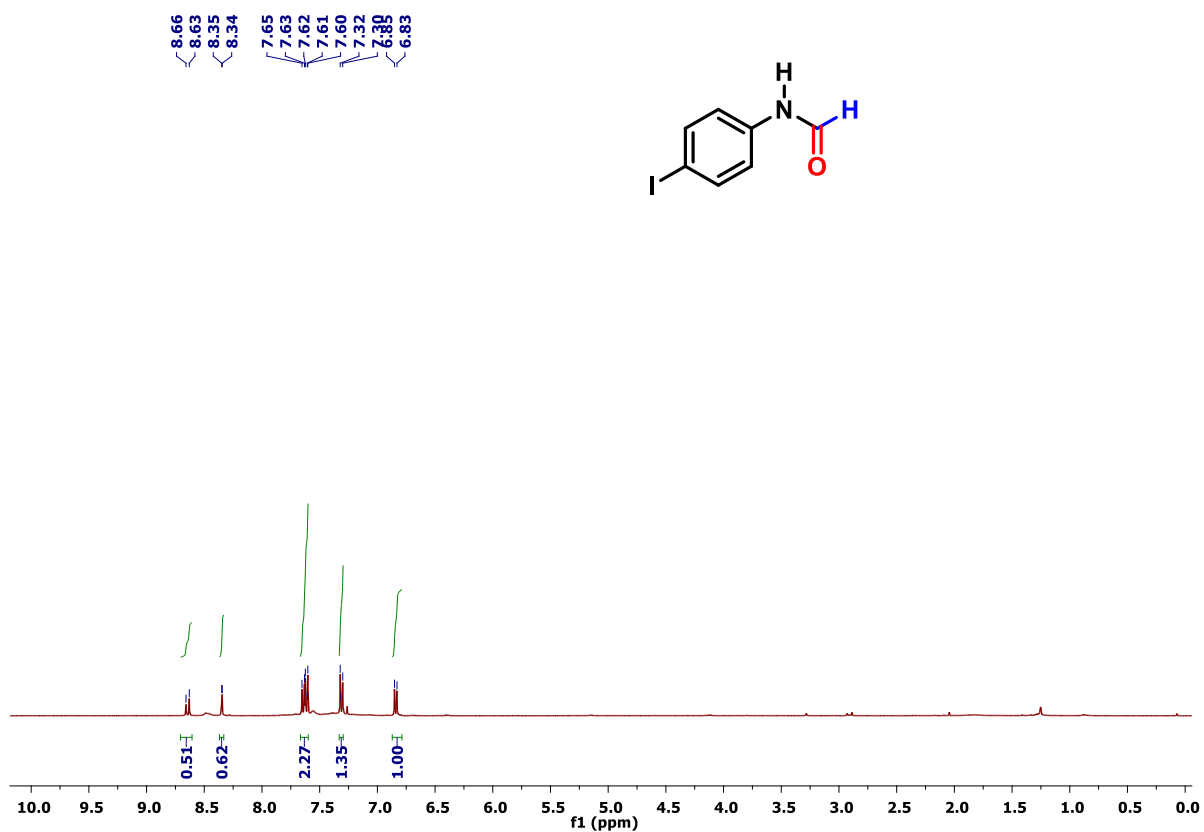

**Figure S18.**  $^1\text{H}$  NMR spectrum of the reaction mixture after 24h at 40 °C (4-iodo-BBN, mNHO-BBN-formate in  $\text{CDCl}_3$ ).

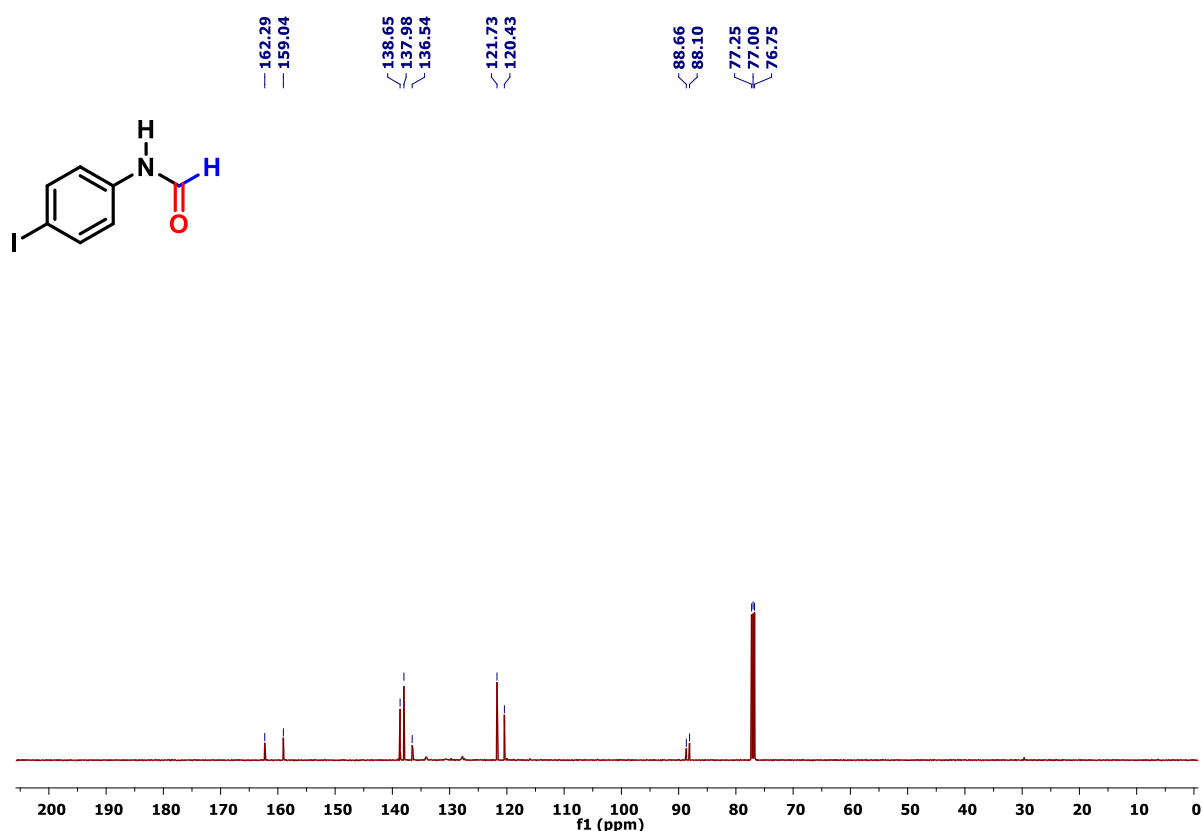

**Figure S19.** <sup>13</sup>C NMR spectrum of the reaction mixture after 24h at 40 °C (4-iodo-BBN, mNHO-BBN-formate in CDCl<sub>3</sub>).

g) **A control reaction between formanilide 13 and 9-BBN in absence of mNHO**

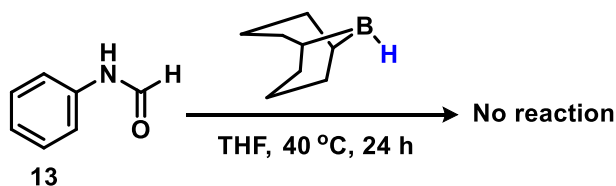

**Scheme S14.** Reaction of formanilide and 9-BBN.

An oven-dried 25 mL Schlenk tube equipped with a stirring bar was charged with formanilide (43.8 mg, 0.2 mmol, and 1 equiv.), 9-BBN (2.5 equiv.) and THF (0.5 mL) in an argon filled glovebox. Next, the reaction mixture was allowed to stir at 40 °C during 24h. After completion of the reaction, the solvent was removed by vacuum. Next, the resulting reaction mixture was dissolved in CDCl<sub>3</sub> and formation of N-methyl amine product was not observed in proton NMR spectrum.

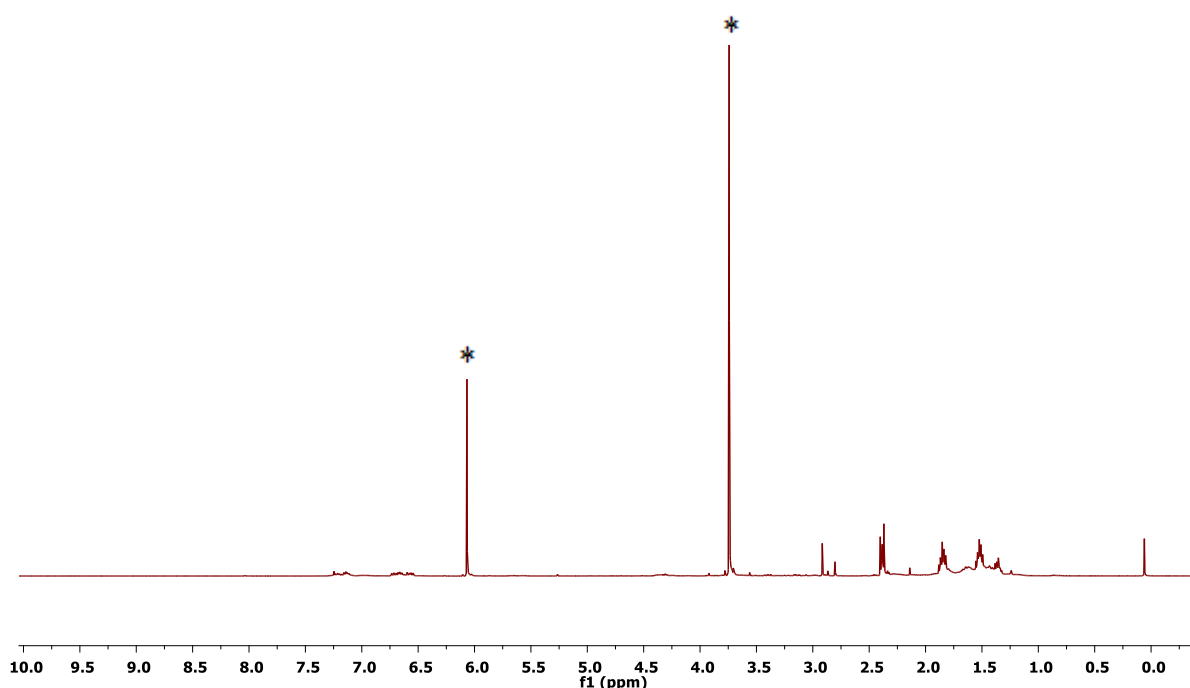

**Figure S20.**  $^1\text{H}$  NMR spectrum of the reaction between formanilide and 9-BBN in  $\text{CDCl}_3$ . \* indicates peaks arising from 1, 3, 5-trimethoxybenzene.

**h) A control reaction between mNHO and  $\text{CO}_2$**

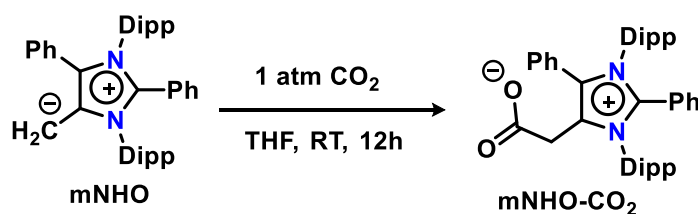

**Scheme S15.** Reaction between mNHO and  $\text{CO}_2$  in THF at RT.

An oven-dried 25 mL Schlenk flask equipped with a stirring bar was charged with the mesoionic N-heterocyclic olefin, mNHO (111 mg, 0.2 mmol, 1 equiv) and THF (2 mL) in an argon filled glovebox. Next, the solution of mNHO was degassed by successive two freeze-pump-thaw cycles and exposed to carbon dioxide (1 atm.). The flask was sealed and allowed to stir during 12h at room temperature. After completion of the reaction, the solvent was dried under reduced pressure and the blue solid was washed with hexane for three times and dried. The compound mNHO- $\text{CO}_2$  was characterized through  $^1\text{H}$  and  $^{13}\text{C}\{^1\text{H}\}$  NMR spectroscopies.



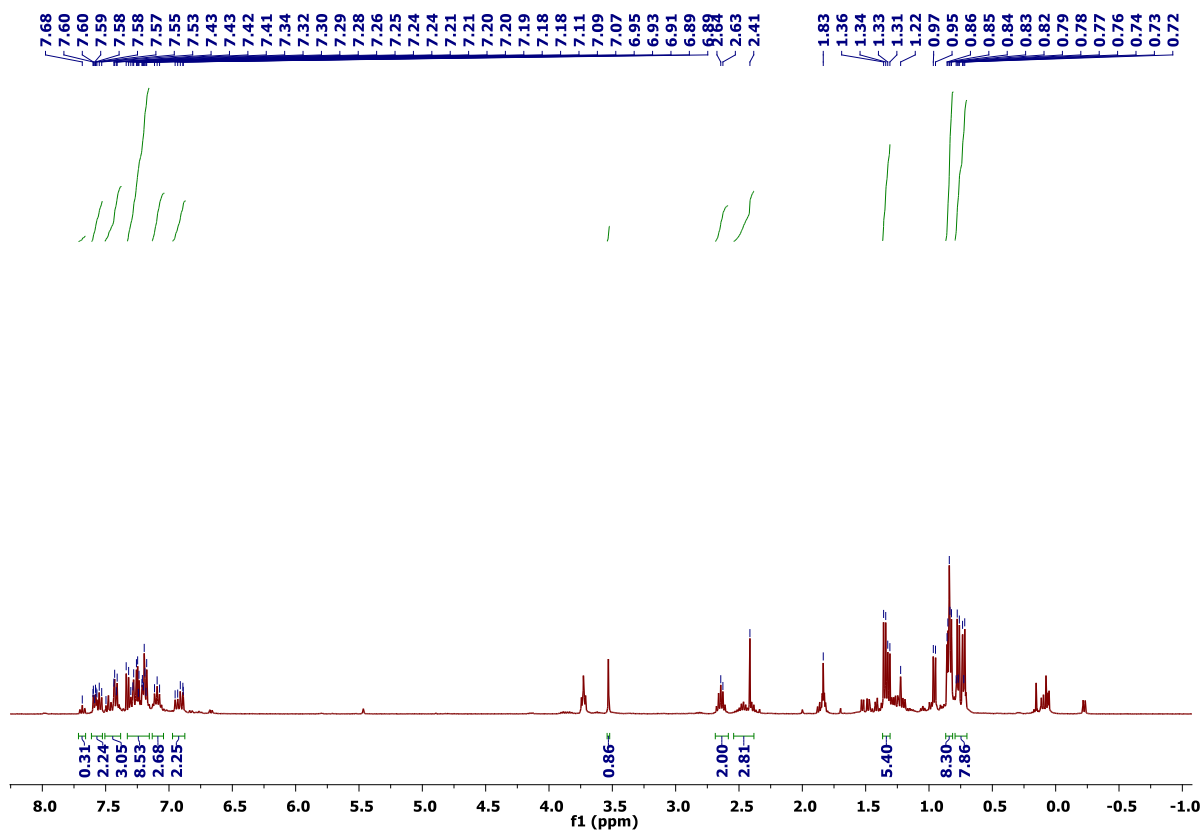

**Figure S21.**  $^1\text{H}$  NMR spectrum of the reaction between mNHO and  $\text{CO}_2$  in  $\text{CDCl}_3$ .

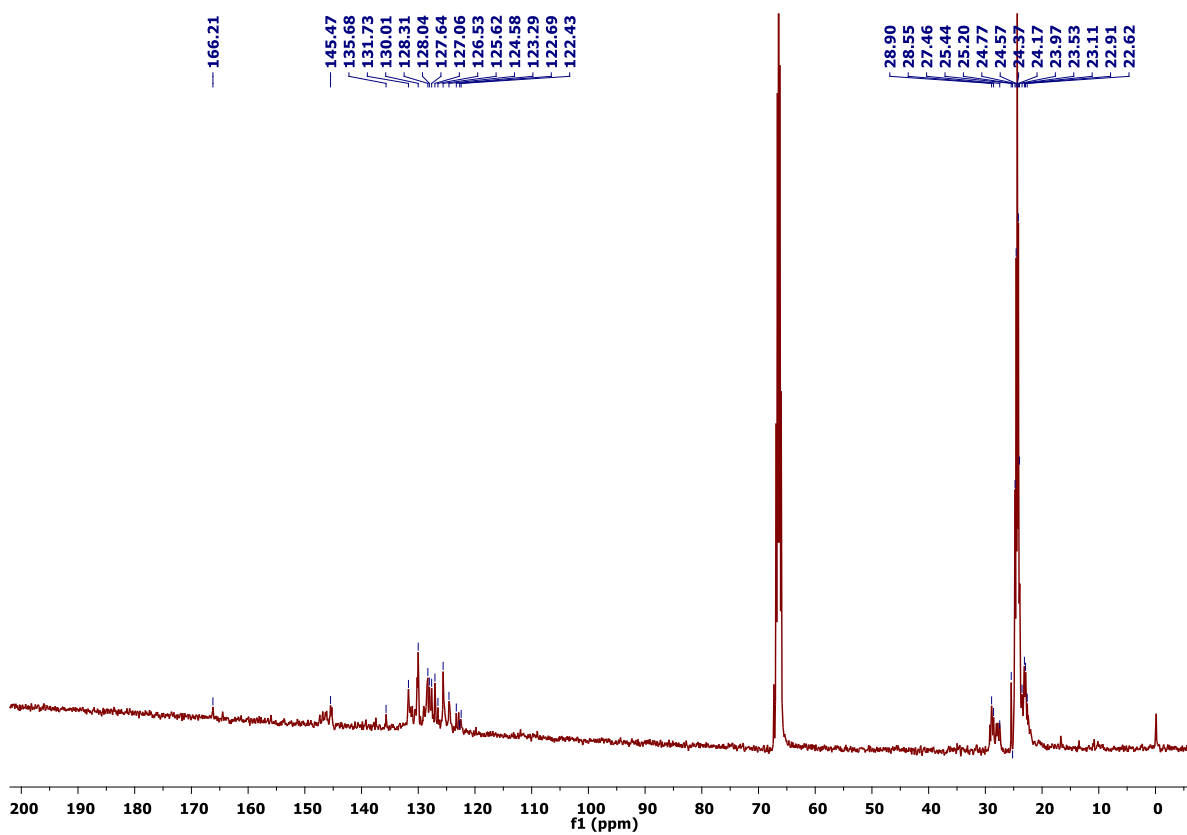

**Figure S22.**  $^{13}\text{C}\{^1\text{H}\}$  NMR spectrum of the reaction between mNHO and  $\text{CO}_2$  in  $\text{THF-d}_8$ .

i) Characterization of N-formyl intermediate during the N-methylation reaction catalysed by mNHO

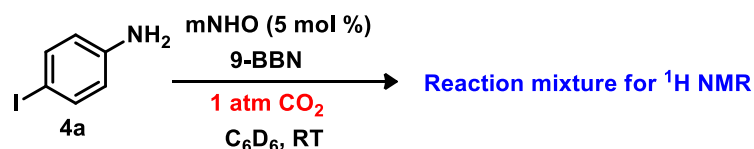

**Scheme S16.** Reaction of 4-iodo aniline, 9-BBN and mNHO in benzene-d<sub>6</sub> at room temperature under 1 atm CO<sub>2</sub> atmosphere during 10 min.

Under an argon atmosphere, a 2.5 mL screw cap NMR tube equipped with a J. Young valve was charged with 4-iodo aniline (11 mg, 0.05 mmol, 1 equiv.), mNHO (5 mol%), 9-BBN (8 equiv.) and benzene-d<sub>6</sub> (0.6 mL). The mixture was degassed by a freeze-pump-thaw cycle and placed under 1 atm of CO<sub>2</sub> at room temperature. After 10 min, the <sup>1</sup>H NMR spectrum of the reaction mixture was recorded confirming the presence of formyl group. This confirms that N-formyl compound acts as an intermediate during the N-methylation process.

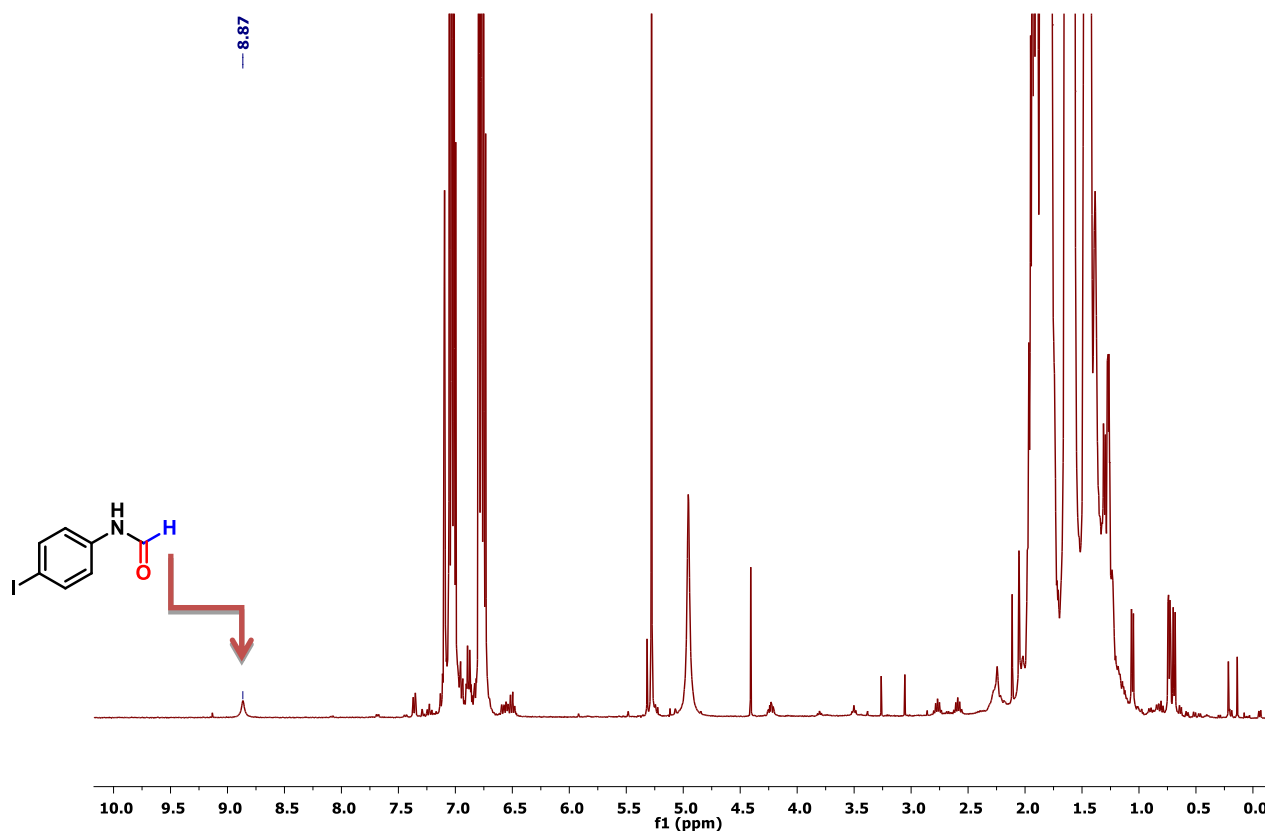

**Figure S23.** <sup>1</sup>H NMR spectrum of the reaction mixture (4-iodo aniline, 9-BBN, and mNHO in benzene-d<sub>6</sub> in room temperature under 1 atm CO<sub>2</sub> atmosphere) using a screw cap NMR tube.

### **Procedure for testing sustainability of catalyst during six successive catalytic cycles**

Six oven dried 25 mL Schlenk tubes equipped with magnetic bar were taken and labelled them appropriately; in each of them 0.2 mmol of diphenylamine, mesoionic N-heterocyclic olefin (mNHO) catalyst (5 mol %), 9-BBN (0.8 mmol) and anhydrous THF (0.5 mL) were taken inside a argon filled glovebox. Following this, six tubes were sealed tightly with the screw cap equipped with a J. Young valve and removed from the glove box. Then the six reaction tubes were connected through the Schlenk line and the mixture was degassed by successive two freeze-pump-thaw cycles and exposed to carbon dioxide (1 atm.). The reaction mixtures were stirred for 24 h at 40 °C. After the first reaction time span (24h), the first reaction tube was uncapped. The rest 5 tubes were transferred to the glovebox and fresh 0.2 mmol of diphenylamine, 9-BBN (0.8 mmol) were added to all remaining five reaction tubes. Then the five reaction tubes were connected through the Schlenk line and the mixture was degassed by a freeze-pump-thaw cycle and exposed to carbon dioxide (1 atm.). After that, the reaction mixtures were stirred for 24 h at 40 °C for the second cycle. It may be noted that no further addition of mNHO catalyst was made in any of these reaction tubes. From the 1st reaction tube, the solvent was removed by high vacuum then the product was purified by column chromatography over silica gel (100-200 mesh) using hexane-ethyl acetate mixture (99:1 v/v) and isolated yield (in percentage) was determined. After second reaction time span of 24 h, the 2nd reaction tube was discontinued and worked up as described previously to record the isolated yield. Subtracting the amount of product formed in tube 1 (first cycle), the exclusive amount of product in second cycle was obtained. The remaining 4 tubes were transferred to the glovebox and fresh 0.2 mmol of diphenylamine, 9-BBN (0.8 mmol) were added to the reaction tubes. Then the 4 reaction tubes were connected through the Schlenk line and the mixture was degassed by a freeze-pump-thaw cycle and exposed to carbon dioxide (1 atm.). Following this, the reaction mixtures were stirred for 24 h at 40 °C for the third cycle. In a similar way, the product was extracted and isolated from tube 3 and amount of product formed had been recorded. Such procedure continued till 6th reaction tube and the yield of product in each cycle was calculated similarly. After calculating yield of product in each cycle, we plot a graph with 'number of cycles' in X-axis and 'yield of product' in Y-axis using the yield recorded for each cycle. It may be noted that the similar procedure was repeated and the average yield is noted in the graph.

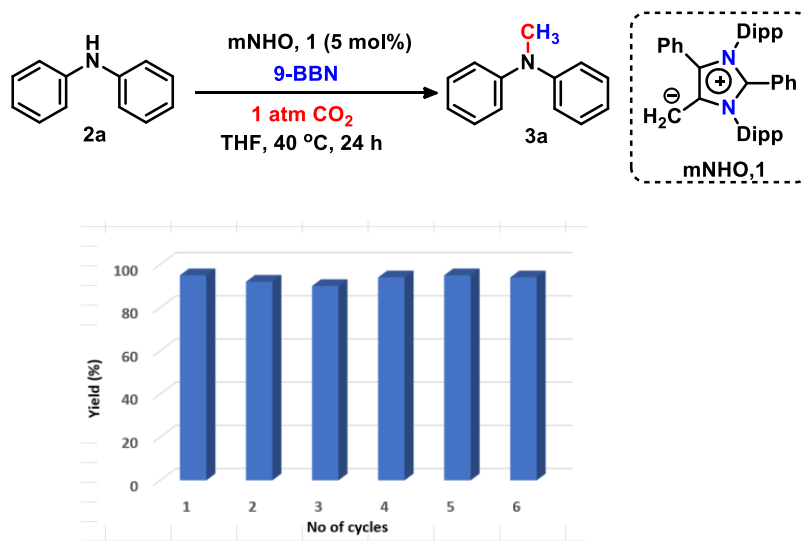

**Scheme S17.** Checking sustainability of the catalyst mNHO in consecutive six cycles.

### **Characterization of (9-BBN)<sub>2</sub>O dimer as a by-product:**

An oven-dried 25 mL Schlenk tube was charged with 0.2 mmol diphenylamine and a magnetic stirring bar. It was kept under high vacuum for 2 h and was transferred into a argon-filled glove box. Inside the glovebox, mesoionic N-heterocyclic olefin (mNHO) catalyst (5 mol %), 9-BBN (0.8 mmol) and anhydrous THF (0.5mL) were added to the reaction tube. Next, the tube was sealed tightly with a screw cap equipped with a J. Young valve and removed from the glovebox. Following this, the reaction tube was connected through the Schlenk line and the mixture was degassed by successive two freeze-pump-thaw cycles and exposed to carbon dioxide (1 atm.) and was stirred for 24 h at 40 °C. After completion of the reaction, the solvent was removed by vacuum and the <sup>1</sup>H and <sup>11</sup>B NMR spectra of the crude mixture were recorded in C<sub>6</sub>D<sub>6</sub>.

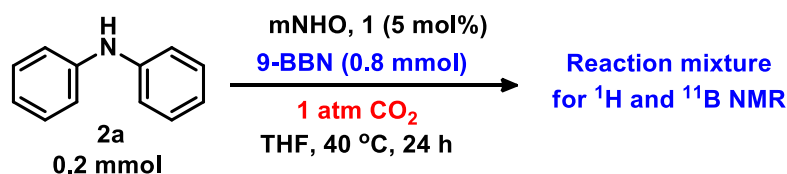

**Scheme S18.** Reaction of diphenylamine, 9-BBN and mNHO in THF at 40 °C under 1 atm CO<sub>2</sub>.

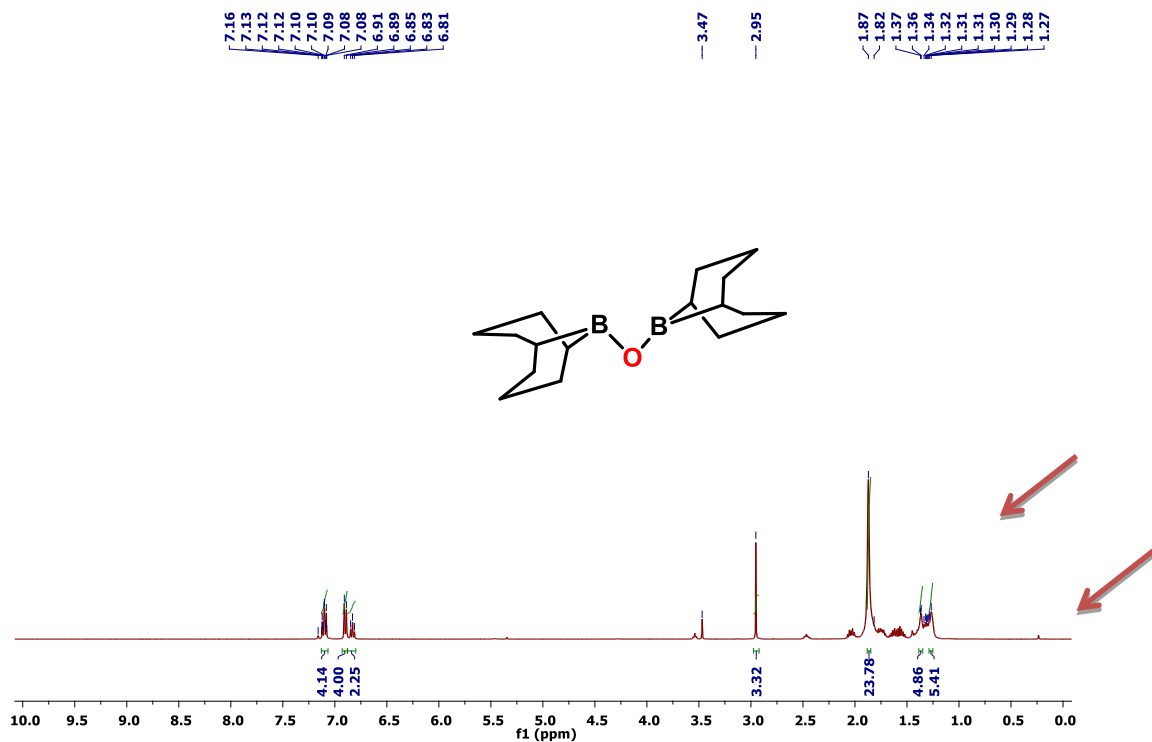

**Figure S24.**  $^1\text{H}$  NMR spectrum of the catalytic reaction mixture in  $\text{C}_6\text{D}_6$  where the peak at (1.87-1.82) ppm and (1.27-1.37) ppm supports the formation of  $(9\text{-BBN})_2\text{O}$  dimer.<sup>S9</sup>

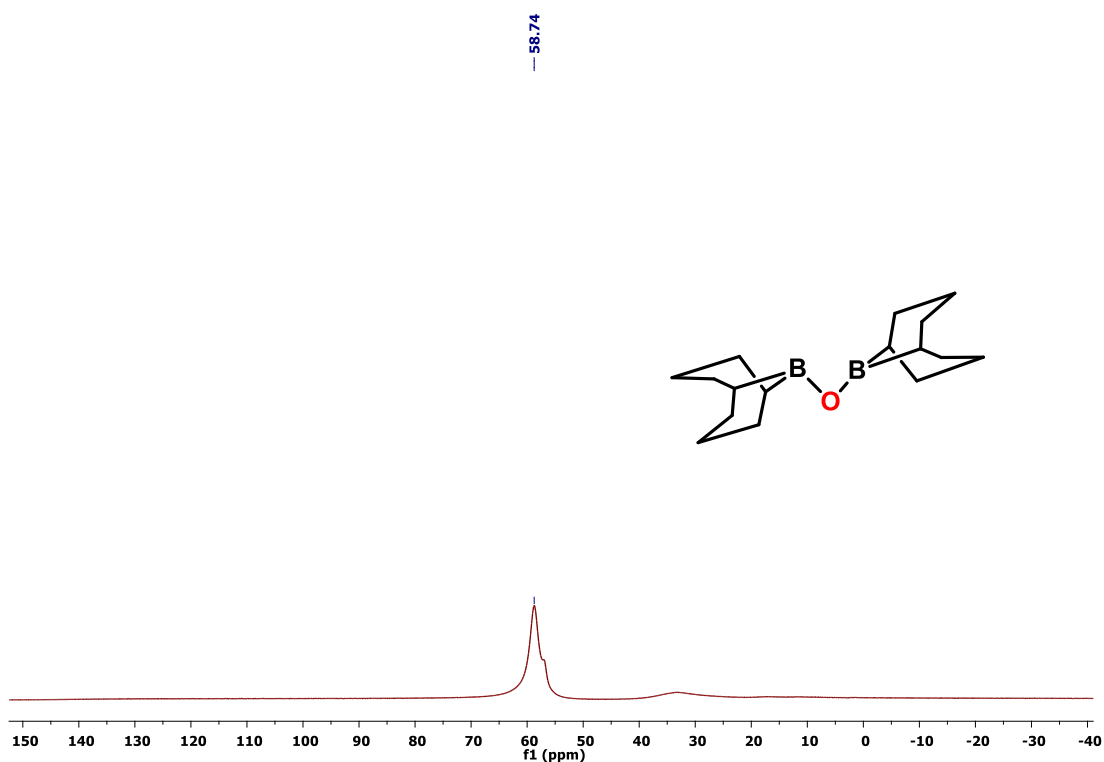

**Figure S25.**  $^{11}\text{B}$  NMR spectrum of the catalytic reaction mixture in  $\text{C}_6\text{D}_6$  where the peak at 58.7 ppm is attributed to  $^{11}\text{B}$  nuclei of boron dimer by comparing the previous reported value.<sup>S9</sup>

**Attempts made for selective mono methylation of 4-iodo aniline:**

Under an argon atmosphere, a 25 mL Schlenk tube equipped with a stir bar and a J. Young valve was charged with 4-iodo aniline (0.2 mmol), mNHO (5 mol%), required amount of 9-borabicyclo (3,3,1)nonane (9-BBN) and THF (0.5 mL). The mixture was degassed by two successive freeze-pump-thaw cycles and exposed to carbon dioxide (1 atm.). The tube was sealed and stirred for 24h at varied temperature. Next, the reaction mixture was dried using high vacuum pump and purified by column chromatography on silica gel (Merck, 100-200 mesh). The corresponding product was identified by <sup>1</sup>H NMR spectroscopy in CDCl<sub>3</sub>.

We have tried selective N-monomethylation of primary amines by lowering the amount of 9-BBN and altering the reaction condition, however these attempts were not successful.

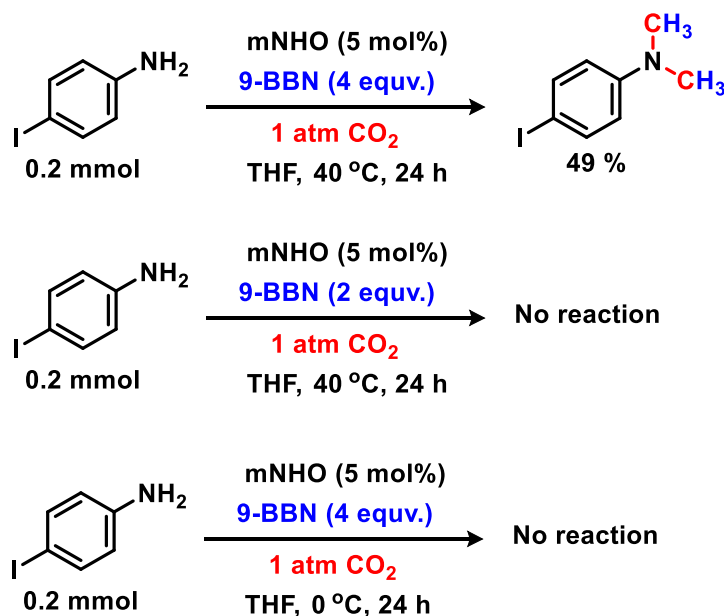

*Scheme S19.* Attempts made for selective mono methylation of 4-iodo aniline.

## Synthesis of drug molecules:

### a) Angustureine antimalarial drug synthesis:

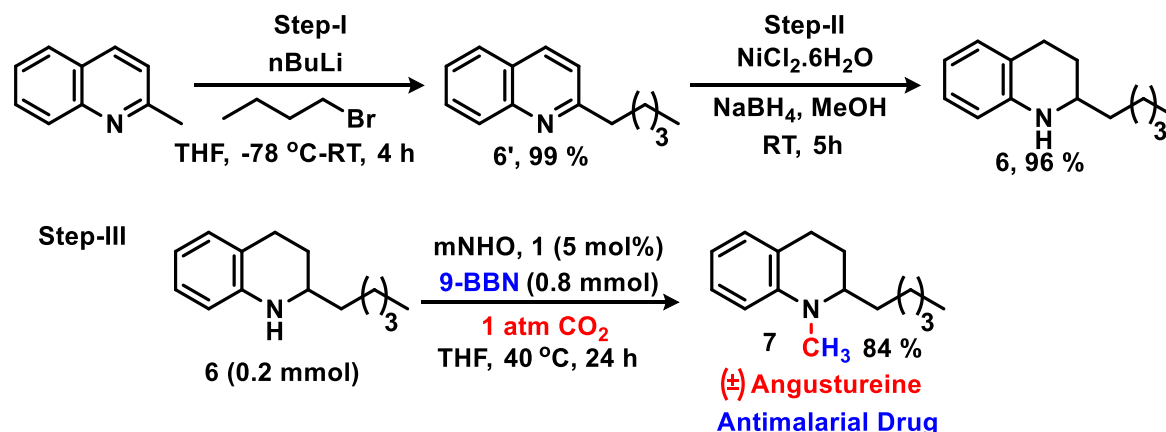

Step-I <sup>S3</sup>: To a solution of 1-methylquinoline (1 mmol) in dry THF (5 ml) at  $0\text{ }^\circ\text{C}$ , *n*-butyllithium (1equiv.) was added in THF solution (2.5M) dropwise. The mixture was stirred at room temperature for 1.5 h and was cooled to  $0\text{ }^\circ\text{C}$ . Following this, 1 mmol butyl bromide was added dropwise to the solution. The mixture was stirred overnight. Water was added carefully to quench the reaction and the mixture was extracted by 50 mL ethyl acetate. The extract was dried over sodium sulphate, evaporated and purified by column chromatography to yield the desired product as yellow oil (99% yield). The compound **6'** was identified by  $^1\text{H}$  and  $^{13}\text{C}\{^1\text{H}\}$  NMR spectroscopy in  $\text{CDCl}_3$ .

$^1\text{H}$  NMR (400 MHz,  $\text{CDCl}_3$ ,  $25\text{ }^\circ\text{C}$ ):  $\delta$  (ppm) = 8.04 (d, 1H, 8Hz, Ar-H), 7.98 (dd, 1H, 8Hz, Ar-H), 7.71-7.69 (m, 1H, Ar-H), 7.65-7.61 (m, 1H, Ar-H), 7.43-7.41 (m, 1H, Ar-H), 7.24-7.21 (m, 1H, Ar-H), 2.96-2.92 (m, 2H,  $\text{CH}_2$ ), 1.82-1.75 (m, 2H,  $\text{CH}_2$ ), 1.39-1.32 (m, 4H,  $\text{CH}_2$ ), 0.89-0.86 (m, 3H,  $\text{CH}_3$ );  $^{13}\text{C}\{^1\text{H}\}$  NMR (100 MHz,  $\text{CDCl}_3$ ,  $25\text{ }^\circ\text{C}$ ):  $\delta$  (ppm) = 162.9 (Ar-C), 147.3 (Ar-C), 135.9 (Ar-CH), 129.7 (Ar-CH), 128.7 (Ar-CH), 127.3 (Ar-CH), 126.5 (Ar-C), 125.4 (Ar-CH), 121.2 (Ar-CH), 39.2 ( $\text{CH}_2$ ), 31.6 ( $\text{CH}_2$ ), 29.6 ( $\text{CH}_2$ ), 22.4 ( $\text{CH}_2$ ), 13.9 ( $\text{CH}_3$ ).

S4

Step-II <sup>S4</sup>: The Compound **7** (0.5 mmol) and  $\text{NiCl}_2 \cdot 6\text{H}_2\text{O}$  (5 mol %) were taken in a 100 mL RB flask and dissolved in 10 mL of methanol. Next,  $\text{NaBH}_4$  (2.0 mmol) was added in portion at  $0\text{ }^\circ\text{C}$  and stirred for 30 min at RT. After completion of the reaction, methanol was evaporated and black ppt. was dissolved in 10% HCl, the acidic solution was treated with

conc. ammonium hydroxide solution and **6** was extracted with ether. The extract was dried over sodium sulphate, evaporated and purified by column chromatography to yield the desired product as yellow oil (96% yield). The compound **6** was identified by  $^1\text{H}$  and  $^{13}\text{C}$  NMR spectroscopy in  $\text{CDCl}_3$ .

$^1\text{H}$  NMR (400 MHz,  $\text{CDCl}_3$ , 25 °C):  $\delta$  (ppm) = 7.05 (t, 2H, 8Hz, Ar-H), 6.69 (t, 1H, 8Hz, Ar-H), 6.54 (d, 1H, 8Hz, Ar-H), 3.8 (b, 1H, NH), 3.33-3.30 (m, 1H, CH), 2.90-2.79 (m, 2H,  $\text{CH}_2$ ), 2.07-2.02 (m, 1H,  $\text{CH}_2$ ), 1.72-1.67 (m, 1H,  $\text{CH}_2$ ), 1.58-1.51 (m, 2H,  $\text{CH}_2$ ), 1.49-1.42 (m, 6H,  $\text{CH}_2$ ), 1.02 (t, 3H, 8 Hz,  $\text{CH}_3$ );  $^{13}\text{C}\{^1\text{H}\}$  NMR (100 MHz,  $\text{CDCl}_3$ , 25 °C):  $\delta$  (ppm) = 144.7 (Ar-C), 129.1 (Ar-CH), 126.6 (Ar-CH), 121.2 (Ar-C), 116.8 (Ar-CH), 114.0 (Ar-CH), 51.5 (CH), 36.6 ( $\text{CH}_2$ ), 31.9 ( $\text{CH}_2$ ), 28.0 ( $\text{CH}_2$ ), 26.4 ( $\text{CH}_2$ ), 25.3 ( $\text{CH}_2$ ), 22.6 ( $\text{CH}_2$ ), 14.0 ( $\text{CH}_3$ ).<sup>S4</sup>

Step-III: Under an argon atmosphere, a 25 mL Schlenk tube equipped with a stir bar and a J. Young valve was charged with 0.2 mmol **6**, 5 mol% mNHO and 0.8 mmol 9-borabicyclo [3. 3. 1] nonane (9-BBN) in 0.5 mL THF. The mixture was degassed by successive two freeze-pump-thaw cycles and exposed to carbon dioxide (1 atm.). The flask was sealed and stirred for 24 h at 40 °C. Then the reaction mixture was dried using high vacuum pump and purified by column chromatography on silica gel (Merck, 100-200 mesh). The compound **7** (84%) was then collected in analytically pure form using hexane-ethyl acetate mixture (99:1 v/v) as the eluent. The compound **7** was identified by  $^1\text{H}$  and  $^{13}\text{C}\{^1\text{H}\}$  NMR spectroscopy in  $\text{CDCl}_3$ <sup>S4</sup>.

$^1\text{H}$  NMR (400 MHz,  $\text{CDCl}_3$ , 25 °C) :  $\delta$  (ppm) = 7.09 (t, 1H, 8Hz, Ar-H), 6.98 (d, 1H, 8Hz, Ar-H), 6.59 (t, 1H, 8Hz, Ar-H), 6.53 (d, 1H, 8Hz, Ar-H), 3.27-3.21(m, 1H, CH), 2.94 (s, 3H,  $\text{NCH}_3$ ), 2.86-2.77 (m, 1H,  $\text{CH}_2$ ), 2.69-2.63 (m, 1H,  $\text{CH}_2$ ), 1.93-1.84 (m, 1H,  $\text{CH}_2$ ), 1.64-1.56 (m, 1H,  $\text{CH}_2$ ), 1.40-1.27 (m, 7H,  $\text{CH}_2$ ), 0.91 (t, 3H, 8 Hz,  $\text{CH}_3$ );  $^{13}\text{C}\{^1\text{H}\}$  NMR (100 MHz,  $\text{CDCl}_3$ , 25 °C):  $\delta$  (ppm) = 145.3 (Ar-C), 128.5 (Ar-CH), 127.8 (Ar-CH), 121.82 (Ar-C) 115.1 (Ar-CH), 110.3 (Ar-CH), 58.9 (CH), 37.9 ( $\text{NCH}_3$ ), 32.0 ( $\text{CH}_2$ ), 31.1 ( $\text{CH}_2$ ), 25.7 ( $\text{CH}_2$ ), 24.3 ( $\text{CH}_2$ ), 23.5 ( $\text{CH}_2$ ), 22.6 ( $\text{CH}_2$ ), 14.0 ( $\text{CH}_3$ ).



## b) Pempidine drug synthesis:

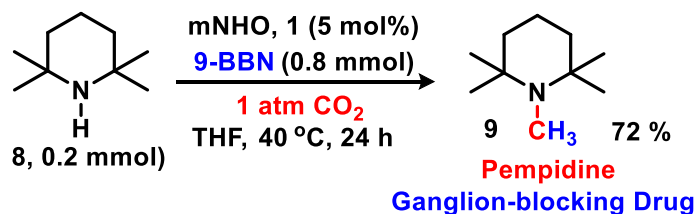

Under an argon atmosphere, a 25 mL Schlenk tube equipped with a stir bar and a J. Young valve was charged with 0.2 mmol 2, 2, 6, 6-tetramethylpiperidine **8**, 5 mol% mNHO and 0.8 mmol 9-borabicyclo (3,3,1)nonane (9-BBN) in 0.5 mL THF . The mixture was degassed by successive two freeze-pump-thaw cycles and exposed to carbon dioxide (1 atm.) and was stirred for 24 h at 40 °C. Next, the reaction mixture was dried using high vacuum pump and purified by column chromatography on silica gel (Merck, 100-200 mesh). The 1, 2, 2, 6, 6-pentamethylpiperidine **9** (72%) was collected in analytically pure form using hexane-ethyl acetate mixture (99:1 v/v) as the eluent. The compound **9** was identified by  $^1\text{H}$  and  $^{13}\text{C}\{^1\text{H}\}$  NMR spectroscopy in  $\text{CDCl}_3$ .<sup>S6</sup>

$^1\text{H}$  NMR (400 MHz,  $\text{CDCl}_3$ , 25 °C):  $\delta$  (ppm) = 2.20 (s, 3H,  $\text{NCH}_3$ ), 1.52-1.46 (m, 2H,  $\text{CH}_2$ ), 1.43-1.40 (m, 4H,  $\text{CH}_2$ ), 1.01(s, 12H,  $(\text{CH}_3)_4$ );  $^{13}\text{C}\{^1\text{H}\}$  NMR (100 MHz,  $\text{CDCl}_3$ , 25 °C):  $\delta$  (ppm) = 53.7,  $\text{C}(\text{CH}_3)_4$ , 41.2 ( $\text{NCH}_3$ ), 28.5 ( $\text{CH}_2$ ), 16.3 ( $\text{CH}_2$ ), 17.6 ( $\text{CH}_3$ )<sub>4</sub>.

## III) Characterization of N-methyl and N, N- dimethyl amine compounds

### $^1\text{H}$ and $^{13}\text{C}\{^1\text{H}\}$ NMR Data of Products

#### N-Methyl-N-phenylaniline (**3a**)<sup>S10</sup>:

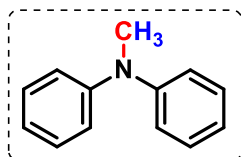

The compound was purified by column chromatography on silica gel with hexane and ethyl acetate mixture (99: 1 v/v) as eluent.

Yellow liquid (95% yield);  $^1\text{H}$  NMR (400 MHz,  $\text{CDCl}_3$ , 25 °C):  $\delta$  (ppm) = 7.36-7.32 (m, 4H, Ar-H), 7.14-7.08 (m, 4H, Ar-H), 7.04-7.00 (m, 1H, Ar-H), 3.38 (s, 3H,  $\text{NCH}_3$ );  $^{13}\text{C}\{^1\text{H}\}$

**NMR** (100 MHz, CDCl<sub>3</sub>, 25 °C):  $\delta$  (ppm) = 148.9 (Ar-C), 129.1 (Ar-CH), 121.2 (Ar-CH), 120.4 (Ar-CH), 40.1 (NCH<sub>3</sub>).

**N, 4-dimethyl-N-(p-tolyl)aniline (3b)<sup>S11</sup>:**

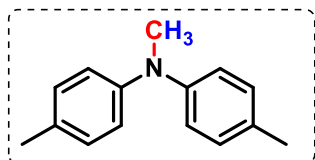

The compound was purified by column chromatography on silica gel with hexane and ethyl acetate mixture (99:1 v/v) as eluent.

Yellow liquid (86% yield); **<sup>1</sup>H NMR** (400 MHz, CDCl<sub>3</sub>, 25 °C):  $\delta$  (ppm) = 7.08 (d, 4H, 8 Hz, Ar-H), 6.91(d, 4H, 6.8 Hz, Ar-H), 3.27(s, 1H, NCH<sub>3</sub>), 2.31 (s, 6H, CH<sub>3</sub>); **<sup>13</sup>C{<sup>1</sup>H} NMR** (100 MHz, CDCl<sub>3</sub>, 25 °C):  $\delta$  (ppm) = 147.1(Ar-C), 130.4 (Ar-C), 129.7 (Ar-CH), 120.4 (Ar-CH), 40.4 (NCH<sub>3</sub>), 20.6 (CH<sub>3</sub>).

**N, 4-dimethyl-N-phenylaniline (3c)<sup>S12</sup>:**

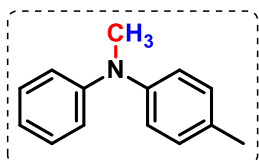

The compound was purified by column chromatography on silica gel with hexane and ethyl acetate mixture (99:1 v/v) as eluent.

Yellow liquid (79% yield); **<sup>1</sup>H NMR** (400 MHz, CDCl<sub>3</sub>, 25 °C):  $\delta$  (ppm) = 7.23 (t, 2H, 8 Hz, Ar-H), 7.12 (d, 2H, 8 Hz, Ar-H), 7.00 (d, 2H, 8 Hz, Ar-H), 6.92 (d, 2H, 8 Hz, Ar-H), 6.87 (t, 1H, 8 Hz, Ar-H), 3.29 (s, 1H, NCH<sub>3</sub>), 2.32 (s, 3H, CH<sub>3</sub>); **<sup>13</sup>C{<sup>1</sup>H} NMR** (100 MHz, CDCl<sub>3</sub>, 25 °C):  $\delta$  (ppm) = 149.4 (Ar-C), 146.6 (Ar-C), 132.0 (Ar-C), 129.9 (Ar-CH), 129.0 (Ar-CH), 122.5 (Ar-CH), 119.8 (Ar-CH), 118.2 (Ar-CH), 40.3 (NCH<sub>3</sub>), 20.7 (CH<sub>3</sub>).

**4-methoxy-N-methyl-N-phenylaniline (3d)<sup>S12</sup>:**

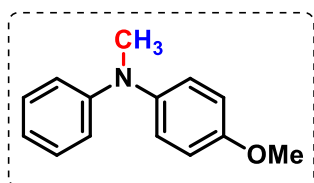

The compound was purified by column chromatography on silica gel with hexane and ethyl acetate mixture (99:1 v/v) as eluent.

Yellow liquid (83% yield);  $^1\text{H NMR}$  (400 MHz,  $\text{CDCl}_3$ , 25 °C):  $\delta$  (ppm) = 7.21 (t, 2H, 8 Hz, Ar-H), 7.10 (d, 2H, 8 Hz, Ar-H), 6.90 (d, 2H, 8 Hz, Ar-H), 6.79 (t, 1H, 8 Hz, Ar-H), 3.82 (s, 3H,  $\text{OCH}_3$ ), 3.27 (s, 3H,  $\text{NCH}_3$ );  $^{13}\text{C}\{^1\text{H}\}$  NMR (100 MHz,  $\text{CDCl}_3$ , 25 °C):  $\delta$  (ppm) = 156.3 (Ar-C), 149.8 (Ar-C), 142.3 (Ar-C), 128.9 (Ar-CH), 126.2 (Ar-CH), 118.3 (Ar-CH), 115.8 (Ar-CH), 114.8 (Ar-CH), 55.5 ( $\text{OCH}_3$ ), 40.5 ( $\text{NCH}_3$ ).

#### 4-isopropyl-N-methyl-N-phenylaniline (3e)<sup>S12</sup>:

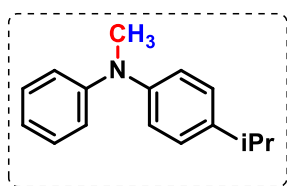

The compound was purified by column chromatography on silica gel with hexane and ethyl acetate mixture (99: 1 v/v) as eluent.

Yellow liquid (80% yield);  $^1\text{H NMR}$  (400 MHz,  $\text{CDCl}_3$ , 25 °C):  $\delta$  (ppm) = 7.26 (t, 2H, 8 Hz, Ar-H), 7.18 (d, 2H, 8 Hz, Ar-H), 7.03 (d, 2H, 8 Hz, Ar-H), 6.97 (d, 2H, 8 Hz, Ar-H), 6.90 (t, 1H, 8 Hz, Ar-H), 3.32 (s, 3H,  $\text{NCH}_3$ ), 2.95-2.86 (m, 1H,  $\text{CH}_2$ ), 1.28 (d, 6H, 4 Hz,  $\text{CH}_3$ );  $^{13}\text{C}\{^1\text{H}\}$  NMR (100 MHz,  $\text{CDCl}_3$ , 25 °C):  $\delta$  (ppm) = 149.3 (Ar-C), 146.8 (Ar-C), 142.8 (Ar-C), 129.0 (Ar-CH), 127.2 (Ar-CH), 122.0 (Ar-CH), 120.0 (Ar-CH), 118.6 (Ar-CH), 40.3 ( $\text{NCH}_3$ ), 33.4 ( $\text{CH}_2$ ), 24.1( $\text{CH}_3$ ).

#### 4-ethyl-N-methyl-N-phenylaniline (3f):

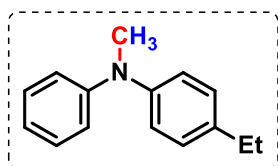

The compound was purified by column chromatography on silica gel with hexane and ethyl acetate mixture (99: 1 v/v) as eluent.

Yellow liquid (81% yield);  $^1\text{H NMR}$  (400 MHz,  $\text{CDCl}_3$ , 25 °C):  $\delta$  (ppm) = 7.27 (t, 2H, 8 Hz, Ar-H), 7.17 (d, 2H, 8 Hz, Ar-H), 7.05 (d, 2H, 8 Hz, Ar-H), 6.97 (d, 2H, 8 Hz, Ar-H), 6.91 (t, 1H, 8 Hz, Ar-H), 3.33 (s, 3H,  $\text{NCH}_3$ ), 2.66 (q, 2H, 8 Hz,  $\text{CH}_2$ ), 1.28 (t, 3H, 8 Hz,  $\text{CH}_3$ );  $^{13}\text{C}\{^1\text{H}\}$  NMR (100 MHz,  $\text{CDCl}_3$ , 25 °C):  $\delta$  (ppm) = 149.3 (Ar-C), 146.8 (Ar-C), 138.3 (Ar-

C), 129.0 (Ar-CH), 128.6 (Ar-CH), 122.3 (Ar-CH), 119.9 (Ar-CH), 118.3 (Ar-CH), 40.3 (NCH<sub>3</sub>), 28.2 (CH<sub>2</sub>), 15.6 (CH<sub>3</sub>).

HRMS: m/z calc. for C<sub>15</sub>H<sub>17</sub>N [M+H]<sup>+</sup> 212.1434, found 212.1425.

#### 4-bromo-N-methyl-N-phenylaniline (3g)<sup>S13</sup>:

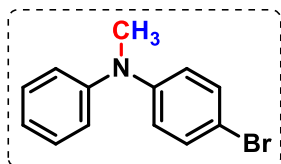

The compound was purified by column chromatography on silica gel with hexane and ethyl acetate mixture (99:1 v/v) as eluent.

Yellow liquid (73% yield); <sup>1</sup>H NMR (400 MHz, CDCl<sub>3</sub>, 25 °C): δ (ppm) = 7.33 (q, 4H, 8 Hz, Ar-H), 7.07-7.02 (m, 3H, Ar-H), 6.84 (d, 2H, 8 Hz, Ar-H), 3.29 (s, 3H, NCH<sub>3</sub>); <sup>13</sup>C{<sup>1</sup>H} NMR (100 MHz, CDCl<sub>3</sub>, 25 °C): δ (ppm) = 148.5 (Ar-C), 148.1 (Ar-C), 131.9 (Ar-CH), 129.4 (Ar-CH), 122.6 (Ar-CH), 121.9 (Ar-CH), 120.6 (Ar-CH), 112.7 (Ar-C), 40.3 (NCH<sub>3</sub>).

#### 4-chloro-N-methyl-N-(p-tolyl) aniline (3h)<sup>S14</sup>:

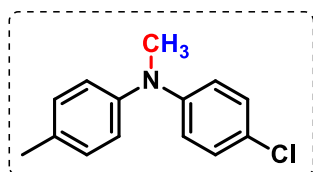

The compound was purified by column chromatography on silica gel with hexane and ethyl acetate mixture (99:1 v/v) as eluent.

Yellow liquid (76% yield); <sup>1</sup>H NMR (400 MHz, CDCl<sub>3</sub>, 25 °C): δ (ppm) = 7.15 (t, 4H, 8 Hz, Ar-H), 7.00 (d, 2H, 8Hz, Ar-H), 6.80 (d, 2H, 8 Hz, Ar-H), 3.26 (s, 3H, NCH<sub>3</sub>), 2.33 (s, 3H, CH<sub>3</sub>); <sup>13</sup>C{<sup>1</sup>H} NMR (100 MHz, CDCl<sub>3</sub>, 25 °C): δ (ppm) = 148.0 (Ar-C), 146.2 (Ar-C), 132.9 (Ar-C), 130.1 (Ar-CH), 128.8 (Ar-CH), 124.2 (Ar-C), 123.3 (Ar-CH), 118.6 (Ar-CH), 40.4 (NCH<sub>3</sub>), 20.8 (CH<sub>3</sub>).

### 1, 2-dimethyl-1, 2, 3,4-tetrahydroquinoline (3i)<sup>S15</sup>:

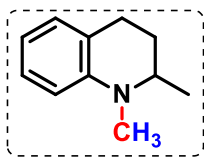

The compound was purified by column chromatography on silica gel with hexane and ethyl acetate mixture (99:1 v/v) as eluent.

Yellow liquid (73% yield); <sup>1</sup>H NMR (400 MHz, CDCl<sub>3</sub>, 25 °C): δ (ppm) = 7.10 (t, 1H, 7.6 Hz, Ar-H), 6.98 (d, 1H, 7.6 Hz, Ar-H), 6.62-6.55 (m, 2H, Ar-H), 3.49-3.42 (m, 1H, NCH), 2.91 (s, 3H, NCH<sub>3</sub>), 2.90-2.81 (m, 1H, CH<sub>2</sub>), 2.73-2.67 (m, 1H, CH<sub>2</sub>), 2.04-1.95 (m, 1H, CH<sub>2</sub>), 1.79-1.75 (m, 1H, CH<sub>2</sub>), 1.15 (m, 3H, 6.8 Hz, CH<sub>3</sub>); <sup>13</sup>C{<sup>1</sup>H} NMR (100 MHz, CDCl<sub>3</sub>, 25 °C): δ (ppm) = 145.5 (Ar-C), 128.5 (Ar-CH), 127.1 (Ar-CH), 122.1 (Ar-C), 115.4 (Ar-CH), 110.6 (Ar-CH), 53.8 (NCH), 37.0 (NCH<sub>3</sub>), 28.1 (CH<sub>2</sub>), 23.8 (CH<sub>2</sub>), 17.6 (CH<sub>3</sub>).

### N, N-dimethylaniline (3j)<sup>S10</sup>:

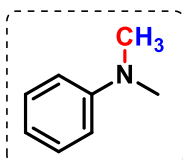

The compound was purified by column chromatography on silica gel with hexane and ethyl acetate mixture (99:1 v/v) as eluent.

Yellow liquid (80% yield); <sup>1</sup>H NMR (400 MHz, CDCl<sub>3</sub>, 25 °C): δ (ppm) = 7.41-7.38 (m, 2H, Ar-H), 6.91-6.89 (m, 3H, Ar-H), 3.07 (s, 6H, N(CH<sub>3</sub>)<sub>2</sub>); <sup>13</sup>C{<sup>1</sup>H} NMR (100 MHz, CDCl<sub>3</sub>, 25 °C): δ (ppm) = 150.6 (Ar-C), 128.9 (Ar-CH), 116.5 (Ar-CH), 112.6 (Ar-CH), 40.4 (N(CH<sub>3</sub>)<sub>2</sub>).

### 4-methyl-N, N-aniline (3k)<sup>S10</sup>:

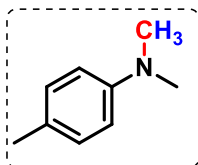

The compound was purified by column chromatography on silica gel with hexane and ethyl acetate mixture (99:1 v/v) as eluent.

Yellow liquid (79% yield);  $^1\text{H NMR}$  (400 MHz,  $\text{CDCl}_3$ , 25 °C):  $\delta$  (ppm) = 7.08 (d, 2H, 8 Hz, Ar-H), 6.72 (d, 2H, 8Hz, Ar-H), 2.92 (s, 6H,  $\text{N}(\text{CH}_3)_2$ ), 2.29 (s, 3H,  $\text{CH}_3$ );  $^{13}\text{C}\{^1\text{H}\}$  NMR (100 MHz,  $\text{CDCl}_3$ , 25 °C):  $\delta$  (ppm) = 148.6 (Ar-C), 129.6 (Ar-CH), 126.1 (Ar-C), 113.2 (Ar-CH), 41.0 ( $\text{N}(\text{CH}_3)_2$ ), 20.2 ( $\text{CH}_3$ ).

#### 4-methoxy-N, N-dimethylaniline (3l)<sup>S10</sup>:

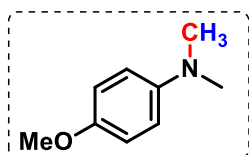

The compound was purified by column chromatography on silica gel with hexane and ethyl acetate mixture (99:1 v/v) as eluent.

Yellow liquid (74% yield);  $^1\text{H NMR}$  (400 MHz,  $\text{CDCl}_3$ , 25 °C):  $\delta$  (ppm) = 6.87 (d, 2H, 8 Hz, Ar-H), 6.77 (d, 2H, 7.6 Hz, Ar-H), 3.78 (s, 3H,  $\text{OCH}_3$ ), 2.88 (s, 6H,  $\text{N}(\text{CH}_3)_2$ );  $^{13}\text{C}\{^1\text{H}\}$  NMR (100 MHz,  $\text{CDCl}_3$ , 25 °C):  $\delta$  (ppm) = 152.0 (Ar-C), 145.8 (Ar-C), 114.9 (Ar-CH), 114.6 (Ar-CH), 55.7 ( $\text{OCH}_3$ ), 41.8 ( $\text{N}(\text{CH}_3)_2$ ).

#### 4-chloro-N, N-dimethylaniline (3m)<sup>S10</sup>:

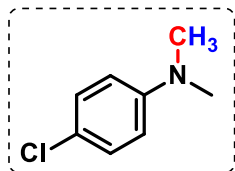

The compound was purified by column chromatography on silica gel with hexane and ethyl acetate mixture (99:1 v/v) as eluent.

Yellow liquid (72% yield);  $^1\text{H NMR}$  (400 MHz,  $\text{CDCl}_3$ , 25 °C):  $\delta$  (ppm) = 7.18 (d, 2H, 8 Hz, Ar-H), 6.65 (d, 2H, 12 Hz, Ar-H), 2.93 (s, 6H,  $\text{N}(\text{CH}_3)_2$ );  $^{13}\text{C}\{^1\text{H}\}$  NMR (100 MHz,  $\text{CDCl}_3$ , 25 °C):  $\delta$  (ppm) = 149.2 (Ar-C), 128.8 (Ar-CH), 121.4 (Ar-C), 113.6 (Ar-CH), 40.6 ( $\text{N}(\text{CH}_3)_2$ ).

#### 4-bromo-N, N-dimethylaniline (3n)<sup>S10</sup>:

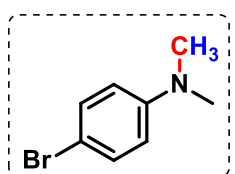

The compound was purified by column chromatography on silica gel with hexane and ethyl acetate mixture (99:1 v/v) as eluent.

Yellow liquid (79% yield);  $^1\text{H NMR}$  (400 MHz,  $\text{CDCl}_3$ , 25 °C):  $\delta$  (ppm) = 7.31 (d, 2H, 8 Hz, Ar-H), 6.59 (d, 2H, 8 Hz, Ar-H), 2.93 (s, 6H,  $\text{N}(\text{CH}_3)_2$ );  $^{13}\text{C}\{^1\text{H}\}$  NMR (100 MHz,  $\text{CDCl}_3$ , 25 °C):  $\delta$  (ppm) = 149.5 (Ar-C), 131.6 (Ar-CH), 114.1 (Ar-CH), 108.5 (Ar-C), 40.5 ( $\text{N}(\text{CH}_3)_2$ ).

#### 4-fluoro-N, N-dimethylaniline (3o)<sup>S7</sup>:

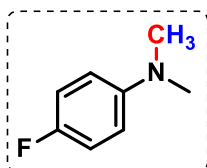

The compound was purified by column chromatography on silica gel with hexane and ethyl acetate mixture (99:1 v/v) as eluent.

Yellow liquid (55% yield);  $^1\text{H NMR}$  (400 MHz,  $\text{CDCl}_3$ , 25 °C):  $\delta$  (ppm) = 6.96 (t, 2H, 8 Hz, Ar-H), 6.71-6.68 (m, 2H, Ar-H), 2.91 (s, 6H,  $\text{N}(\text{CH}_3)_2$ );  $^{13}\text{C}\{^1\text{H}\}$  NMR (100 MHz,  $\text{CDCl}_3$ , 25 °C):  $\delta$  (ppm) = 155.6 (d,  $^1\text{J}_{\text{C-F}}=236$  Hz, Ar-C), 147.5 (Ar-C), 115.3 (d,  $^2\text{J}_{\text{C-F}}=22$  Hz, Ar-CH), 113.9 (d,  $^3\text{J}_{\text{C-F}}=7$  Hz, Ar-CH), 41.3 ( $\text{N}(\text{CH}_3)_2$ ).

#### 4-iodo-N, N-dimethylaniline (5a)<sup>S7</sup>:

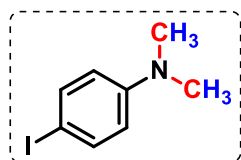

The compound was purified by column chromatography on silica gel with hexane and ethyl acetate mixture (99:1 v/v) as eluent.

Yellow liquid (88% yield);  $^1\text{H NMR}$  (400 MHz,  $\text{CDCl}_3$ , 25 °C):  $\delta$  (ppm) = 7.47 (d, 2H, 8 Hz, Ar-H), 6.49 (d, 2H, 8 Hz, Ar-H), 2.92 (s, 6H,  $\text{N}(\text{CH}_3)_2$ );  $^{13}\text{C}\{^1\text{H}\}$  NMR (100 MHz,  $\text{CDCl}_3$ , 25 °C):  $\delta$  (ppm) = 150.0 (Ar-C), 137.5 (Ar-CH), 114.7 (Ar-CH), 77.4 (Ar-C), 40.4 ( $\text{N}(\text{CH}_3)_2$ ).

#### 4-methyl-N, N-dimethylaniline (5b)<sup>S10</sup>:

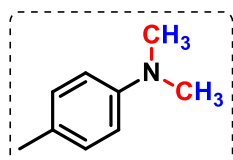

The compound was purified by column chromatography on silica gel with hexane and ethyl acetate mixture (99:1 v/v) as eluent.

Yellow liquid (84% yield); **<sup>1</sup>H NMR** (400 MHz, CDCl<sub>3</sub>, 25 °C): δ (ppm) = 7.08 (d, 2H, 8 Hz, Ar-H), 6.72 (d, 2H, 8Hz, Ar-H), 2.92 (s, 6H, N(CH<sub>3</sub>)<sub>2</sub>), 2.29 (s, 3H, CH<sub>3</sub>); **<sup>13</sup>C{<sup>1</sup>H} NMR** (100 MHz, CDCl<sub>3</sub>, 25 °C): δ (ppm) = 148.6 (Ar-C), 129.6 (Ar-CH), 126.1 (Ar-C), 113.2 (Ar-CH), 41.0 (N(CH<sub>3</sub>)<sub>2</sub>), 20.2 (CH<sub>3</sub>).

#### 4-methoxy-N,N-dimethylaniline (5c)<sup>S10</sup>:

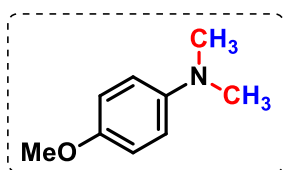

The compound was purified by column chromatography on silica gel with hexane and ethyl acetate mixture (99:1 v/v) as eluent.

Yellow liquid (81% yield); **<sup>1</sup>H NMR** (400 MHz, CDCl<sub>3</sub>, 25 °C): δ (ppm) = 6.87 (d, 2H, 8 Hz, Ar-H), 6.77 (d, 2H, 7.6 Hz, Ar-H), 3.78 (s, 3H, OCH<sub>3</sub>), 2.88 (s, 6H, N(CH<sub>3</sub>)<sub>2</sub>); **<sup>13</sup>C{<sup>1</sup>H} NMR** (100 MHz, CDCl<sub>3</sub>, 25 °C): δ (ppm) = 152.0 (Ar-C), 145.8 (Ar-C), 114.9 (Ar-CH), 114.6 (Ar-CH), 55.7 (OCH<sub>3</sub>), 41.8 (N(CH<sub>3</sub>)<sub>2</sub>).

#### 4-ethyl-N,N-dimethylaniline (5d)<sup>7</sup>:

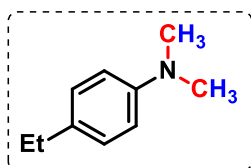

The compound was purified by column chromatography on silica gel with hexane and ethyl acetate mixture (99:1 v/v) as eluent.

Yellow liquid (71% yield); **<sup>1</sup>H NMR** (400 MHz, CDCl<sub>3</sub>, 25 °C): δ (ppm) = 7.13 (d, 2H, 8 Hz, Ar-H), 6.76 (d, 2H, 8 Hz, Ar-H), 2.95 (s, 6H, N(CH<sub>3</sub>)<sub>2</sub>), 2.63-2.58 (q, 2H, 8 Hz, CH<sub>2</sub>(CH<sub>3</sub>)<sub>2</sub>), 1.27-1.23 (t, 3H, 8Hz, (CH<sub>3</sub>)<sub>2</sub>); **<sup>13</sup>C{<sup>1</sup>H} NMR** (100 MHz, CDCl<sub>3</sub>, 25 °C): δ (ppm) = 148.9 (Ar-C), 132.6 (Ar-C), 128.3 (Ar-CH), 113.1 (Ar-CH), 40.9 (N(CH<sub>3</sub>)<sub>2</sub>), 27.8 (CH<sub>2</sub>(CH<sub>3</sub>)<sub>2</sub>), 15.9 ((CH<sub>3</sub>)<sub>2</sub>).



#### 4-isopropyl-N, N-dimethylaniline (5e)<sup>S18</sup>:

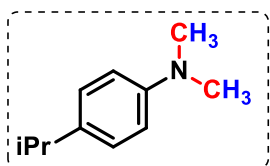

The compound was purified by column chromatography on silica gel with hexane and ethyl acetate mixture (99:1 v/v) as eluent.

Yellow liquid (66% yield); <sup>1</sup>H NMR (400 MHz, CDCl<sub>3</sub>, 25 °C): δ (ppm) = 7.29 (d, 2H, 8 Hz, Ar-H), 6.89 (d, 2H, 8 Hz, Ar-H), 3.07 (s, 6H, N(CH<sub>3</sub>)<sub>2</sub>), 3.04-2.98 (m, 1H, CH(CH<sub>3</sub>)<sub>2</sub>), 1.42-1.40 (d, 6H, 8Hz, (CH<sub>3</sub>)<sub>2</sub>); <sup>13</sup>C{<sup>1</sup>H} NMR (100 MHz, CDCl<sub>3</sub>, 25 °C): δ (ppm) = 149.0 (Ar-C), 137.1 (Ar-C), 126.9 (Ar-CH), 113.0 (Ar-CH), 40.8 (N(CH<sub>3</sub>)<sub>2</sub>), 33.0 (CH(CH<sub>3</sub>)<sub>2</sub>), 24.2 ((CH<sub>3</sub>)<sub>2</sub>).

#### N, N-dimethylaniline (5f)<sup>S10</sup>:

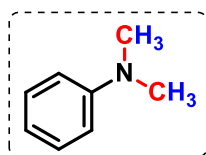

The compound was purified by column chromatography on silica gel with hexane and ethyl acetate mixture (99:1 v/v) as eluent.

Yellow liquid (82% yield); <sup>1</sup>H NMR (400 MHz, CDCl<sub>3</sub>, 25 °C): δ (ppm) = 7.41-7.38 (m, 2H, Ar-H), 6.91-6.89 (m, 3H, Ar-H), 3.07 (s, 6H, N(CH<sub>3</sub>)<sub>2</sub>); <sup>13</sup>C{<sup>1</sup>H} NMR (100 MHz, CDCl<sub>3</sub>, 25 °C): δ (ppm) = 150.6 (Ar-C), 128.9 (Ar-CH), 116.5 (Ar-CH), 112.6 (Ar-CH), 40.4 (N(CH<sub>3</sub>)<sub>2</sub>).

#### 4-bromo-N, N-dimethylaniline (5g)<sup>S10</sup>:

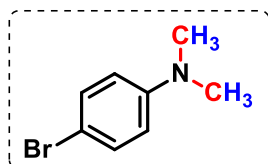

The compound was purified by column chromatography on silica gel with hexane and ethyl acetate mixture (99:1 v/v) as eluent.

Yellow liquid (78% yield);  $^1\text{H NMR}$  (400 MHz,  $\text{CDCl}_3$ , 25 °C):  $\delta$  (ppm) = 7.31 (d, 2H, 8 Hz, Ar-H), 6.59 (d, 2H, 8 Hz, Ar-H), 2.93 (s, 6H,  $\text{N}(\text{CH}_3)_2$ );  $^{13}\text{C}\{^1\text{H}\}$  NMR (100 MHz,  $\text{CDCl}_3$ , 25 °C):  $\delta$  (ppm) = 149.5 (Ar-C), 131.6 (Ar-CH), 114.1 (Ar-CH), 108.6 (Ar-C), 40.5 ( $\text{N}(\text{CH}_3)_2$ ).

**4-chloro-N, N-dimethylaniline (5h)<sup>S10</sup>:**

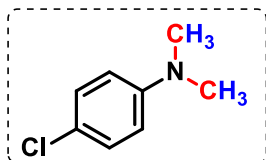

The compound was purified by column chromatography on silica gel with hexane and ethyl acetate mixture (99:1 v/v) as eluent.

Yellow liquid (74% yield);  $^1\text{H NMR}$  (400 MHz,  $\text{CDCl}_3$ , 25 °C):  $\delta$  (ppm) = 7.18 (d, 2H, 8 Hz, Ar-H), 6.65 (d, 2H, 12 Hz, Ar-H), 2.93 (s, 6H,  $\text{N}(\text{CH}_3)_2$ );  $^{13}\text{C}\{^1\text{H}\}$  NMR (100 MHz,  $\text{CDCl}_3$ , 25 °C):  $\delta$  (ppm) = 149.2 (Ar-C), 128.8 (Ar-CH), 121.4 (Ar-C), 113.6 (Ar-CH), 40.6 ( $\text{N}(\text{CH}_3)_2$ ).

**4-fluoro-N, N-dimethylaniline (5i)<sup>S7</sup>:**

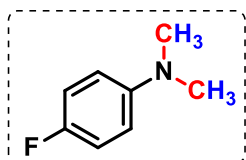

The compound was purified by column chromatography on silica gel with hexane and ethyl acetate mixture (99:1 v/v) as eluent.

Yellow liquid (52% yield);  $^1\text{H NMR}$  (400 MHz,  $\text{CDCl}_3$ , 25 °C):  $\delta$  (ppm) = 6.96 (t, 2H, 8 Hz, Ar-H), 6.71-6.68 (m, 2H, Ar-H), 2.91 (s, 6H,  $\text{N}(\text{CH}_3)_2$ );  $^{13}\text{C}\{^1\text{H}\}$  NMR (100 MHz,  $\text{CDCl}_3$ , 25 °C):  $\delta$  (ppm) = 155.6 (d,  $^1\text{J}_{\text{C-F}}=236$  Hz, Ar-C), 147.5 (Ar-C), 115.3 (d,  $^2\text{J}_{\text{C-F}}=22$  Hz, Ar-CH), 113.9 (d,  $^3\text{J}_{\text{C-F}}=7$  Hz, Ar-CH), 41.3 ( $\text{N}(\text{CH}_3)_2$ ).

**N, N, 2-trimethylaniline (5j)<sup>S10</sup>:**

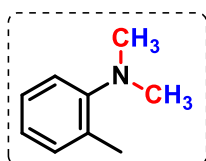

The compound was purified by column chromatography on silica gel with hexane and ethyl acetate mixture (99:1 v/v) as eluent.

Yellow liquid (77% yield);  $^1\text{H NMR}$  (400 MHz,  $\text{CDCl}_3$ , 25 °C):  $\delta$  (ppm) = 7.21 (t, 2H, 8 Hz, Ar-H), 7.07 (d, 1H, 8 Hz, Ar-H), 7.00 (t, 1H, 8 Hz, Ar-H), 2.75 (s, 6H,  $\text{N}(\text{CH}_3)_2$ ), 2.38 (s, 3H,  $\text{CH}_3$ );  $^{13}\text{C}\{^1\text{H}\}$  NMR (100 MHz,  $\text{CDCl}_3$ , 25 °C):  $\delta$  (ppm) = 152.7 (Ar-C), 132.1 (Ar-C), 131.1 (Ar-CH), 126.4 (Ar-CH), 122.5 (Ar-CH), 118.3 (Ar-CH), 44.2 ( $\text{N}(\text{CH}_3)_2$ ), 18.3 ( $\text{CH}_3$ ).

**2-bromo-N, N-dimethylaniline (5k)<sup>S17</sup>:**

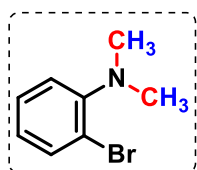

The compound was purified by column chromatography on silica gel with hexane and ethyl acetate mixture (99:1 v/v) as eluent.

Yellow liquid (73% yield);  $^1\text{H NMR}$  (400 MHz,  $\text{CDCl}_3$ , 25 °C):  $\delta$  (ppm) = 7.58 (dd, 1H, 8 Hz, Ar-H), 7.29 (dt, 1H, 8 Hz, Ar-H), 7.11 (dd, 1H, 8 Hz, Ar-H), 6.91 (dt, 1H, 8 Hz, Ar-H), 2.83 (s, 6H,  $\text{N}(\text{CH}_3)_2$ );  $^{13}\text{C}\{^1\text{H}\}$  NMR (100 MHz,  $\text{CDCl}_3$ , 25 °C):  $\delta$  (ppm) = 151.7 (Ar-C), 133.7 (Ar-CH), 128.0 (Ar-CH), 123.8 (Ar-CH), 120.4 (Ar-CH), 119.0 (Ar-C), 44.6 ( $\text{N}(\text{CH}_3)_2$ ).

**2-iodo-N, N-dimethylaniline (5l)<sup>S19</sup>:**

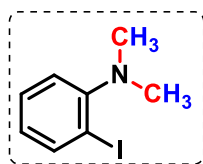

The compound was purified by column chromatography on silica gel with hexane and ethyl acetate mixture (99:1 v/v) as eluent.

Yellow liquid (68% yield);  $^1\text{H NMR}$  (400 MHz,  $\text{CDCl}_3$ , 25 °C):  $\delta$  (ppm) = 7.89 (d, 1H, 8 Hz, Ar-H), 7.35 (t, 1H, 8 Hz, Ar-H), 7.11 (d, 1H, 8 Hz, Ar-H), 6.81 (t, 1H, 8 Hz, Ar-H), 2.81 (s, 6H,  $\text{N}(\text{CH}_3)_2$ );  $^{13}\text{C}\{^1\text{H}\}$  NMR (100 MHz,  $\text{CDCl}_3$ , 25 °C):  $\delta$  (ppm) = 154.8 (Ar-C), 139.9 (Ar-CH), 128.8 (Ar-CH), 124.7 (Ar-CH), 120.2 (Ar-CH), 97.0 (Ar-C), 44.7 ( $\text{N}(\text{CH}_3)_2$ ).

**N, N-dimethyl-[1, 1'-biphenyl]-2-amine (5m)<sup>S8</sup>:**

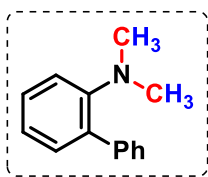

The compound was purified by column chromatography on silica gel with hexane and ethyl acetate mixture (99:1 v/v) as eluent.

Yellow liquid (59% yield); <sup>1</sup>H NMR (400 MHz, CDCl<sub>3</sub>, 25 °C): δ (ppm) = 7.67 (d, 2H, 8 Hz, Ar-H), 7.47 (t, 2H, 8 Hz, Ar-H), 7.38-7.30 (m, 3H, Ar-H), 7.10 (q, 2H, 8 Hz, Ar-H), 2.62 (s, 6H, N(CH<sub>3</sub>)<sub>2</sub>); <sup>13</sup>C{<sup>1</sup>H} NMR (100 MHz, CDCl<sub>3</sub>, 25 °C): δ (ppm) = 151.2 (Ar-C) , 142.0 (Ar-C), 134.1 (Ar-C), 131.7 (Ar-CH), 128.6 (Ar-CH), 128.3 (Ar-CH), 128.0 (Ar-CH), 126.4 (Ar-CH), 121.4 (Ar-CH), 117.5 (Ar-CH), 43.3 (N(CH<sub>3</sub>)<sub>2</sub>).

**N, N-dimethylnaphthalen-1-amine (5n)<sup>S10</sup>:**

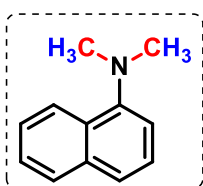

The compound was purified by column chromatography on silica gel with hexane and ethyl acetate mixture (99:1 v/v) as eluent.

Yellow liquid (73% yield); <sup>1</sup>H NMR (400 MHz, CDCl<sub>3</sub>, 25 °C): δ (ppm) = 8.25 (d, 1H, 8 Hz, Ar-H), 7.83 (d, 1H, 8 Hz, Ar-H), 7.54-7.45 (m, 3H, Ar-H), 7.41 (t, 1H, 8 Hz, Ar-H), 7.09 (d, 1H, 8 Hz, Ar-H) 2.92 (s, 6H, N(CH<sub>3</sub>)<sub>2</sub>); <sup>13</sup>C{<sup>1</sup>H} NMR (100 MHz, CDCl<sub>3</sub>, 25 °C): δ (ppm) = 150.9 (Ar-C), 134.8 (Ar-C), 128.8 (Ar-C), 128.3 (Ar-CH), 125.7 (Ar-CH), 125.7 (Ar-CH), 125.1 (Ar-CH), 124.1 (Ar-CH), 122.8 (Ar-CH), 113.9 (Ar-CH), 45.2 (N(CH<sub>3</sub>)<sub>2</sub>).

**N<sup>1</sup>, N<sup>1</sup>, N<sup>2</sup>-trimethyl-N<sup>2</sup>-phenylbenzene -1, 2-diamine (5q)<sup>S16</sup>:**

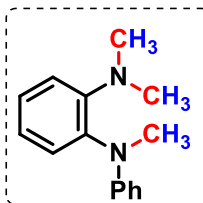

The compound was purified by column chromatography on silica gel with hexane and ethyl acetate mixture (99:1 v/v) as eluent.

Yellow liquid (61% yield);  $^1\text{H NMR}$  (400 MHz,  $\text{CDCl}_3$ , 25 °C):  $\delta$  (ppm) = 7.21-7.11 (m, 4H, Ar-H), 6.99 (dd, 1H, 8Hz, Ar-H), 6.90 (d, 1H, 8 Hz, Ar-H), 6.71-6.75 (m, 3H, Ar-H), 3.18 (s, 3H,  $\text{NCH}_3$ ), 2.74 (s, 6H,  $\text{N}(\text{CH}_3)_2$ );  $^{13}\text{C } \{^1\text{H}\}$  NMR (100 MHz,  $\text{CDCl}_3$ , 25 °C):  $\delta$  (ppm) = 149.3 (Ar-C), 148.6 (Ar-C), 139.1 (Ar-C), 129.2 (Ar-CH), 128.8 (Ar-CH), 126.1 (Ar-CH), 121.2 (Ar-CH), 118.2 (Ar-CH), 117.0 (Ar-CH), 113.5 (Ar-CH), 42.2 ( $\text{NCH}_3$ ), 37.2 ( $\text{N}(\text{CH}_3)_2$ ).

#### IV) X-ray crystallographic details

Single crystals of compound **10** were mounted on a glass pip. Intensity data were collected on a SuperNova, Dual, Mo at zero, Eos diffractometer. The crystals were kept at 100.6 K during data collection. Atomic coordinates, isotropic and anisotropic displacement parameters of all the non-hydrogen atoms of two compounds were refined using Olex2,<sup>S20</sup> and the structure was solved with the Superflip<sup>S21</sup> structure solution program using Charge Flipping and refined with the ShelXL<sup>S22</sup> refinement package using Least Squares minimization. Structure graphic shown in the figure was created using the Olex2 and X-Seed software package version 2.0.

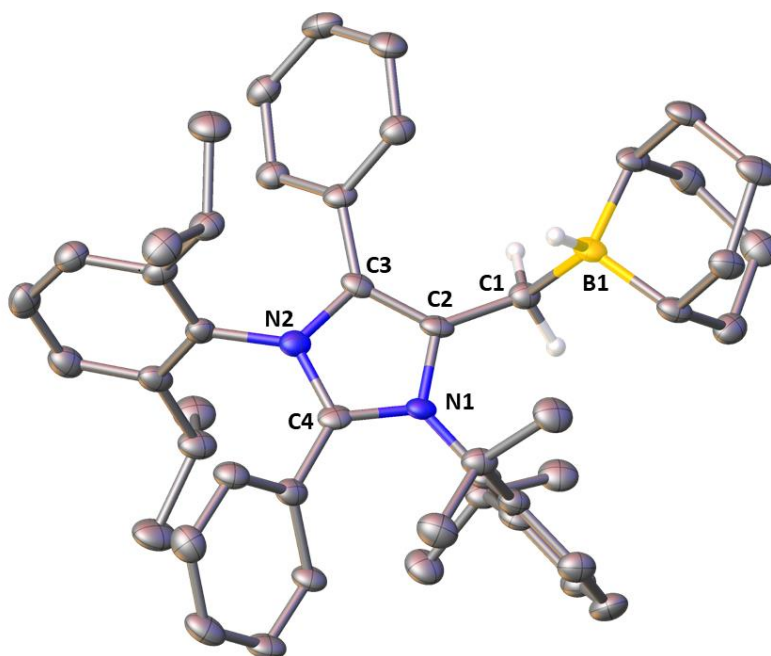

**Figure S26.** View of the molecular structure of **10**. Ellipsoids are set at the 50% probability level; hydrogen atoms except  $-\text{CH}_2$  and the B-H hydrogen's have been omitted for the sake of clarity.

| <b>Table S2 Crystal data and structure refinement data for 10.</b> |                                                                |
|--------------------------------------------------------------------|----------------------------------------------------------------|
| CCDC No                                                            | 2065467                                                        |
| Identification code                                                | mo_TKP180121_0ma_a                                             |
| Empirical formula                                                  | C <sub>96</sub> H <sub>122</sub> B <sub>2</sub> N <sub>4</sub> |
| Formula weight                                                     | 1353.59                                                        |
| Temperature/K                                                      | 100.61                                                         |
| Crystal system                                                     | triclinic                                                      |
| Space group                                                        | P-1                                                            |
| a/Å                                                                | 13.9680(11)                                                    |
| b/Å                                                                | 15.6349(13)                                                    |
| c/Å                                                                | 22.5739(17)                                                    |
| α/°                                                                | 90.009(3)                                                      |
| β/°                                                                | 93.393(2)                                                      |
| γ/°                                                                | 90.024(3)                                                      |
| Volume/Å <sup>3</sup>                                              | 4921.2(7)                                                      |
| Z                                                                  | 2                                                              |
| ρ <sub>calc</sub> /g/cm <sup>3</sup>                               | 0.913                                                          |
| μ/mm <sup>-1</sup>                                                 | 0.052                                                          |
| F(000)                                                             | 1472.0                                                         |
| Crystal size/mm <sup>3</sup>                                       | 0.2 × 0.15 × 0.1                                               |
| Radiation                                                          | MoKα (λ = 0.71073)                                             |
| 2θ range for data collection/°                                     | 4.382 to 50.888                                                |
| Index ranges                                                       | -16 ≤ h ≤ 16, -18 ≤ k ≤ 18, -27 ≤ l ≤ 25                       |
| Reflections collected                                              | 50073                                                          |
| Independent reflections                                            | 18007 [R <sub>int</sub> = 0.1058, R <sub>sigma</sub> = 0.1239] |
| Data/restraints/parameters                                         | 18007/0/935                                                    |
| Goodness-of-fit on F <sup>2</sup>                                  | 1.028                                                          |
| Final R indexes [I >= 2σ (I)]                                      | R <sub>1</sub> = 0.0761, wR <sub>2</sub> = 0.2034              |
| Final R indexes [all data]                                         | R <sub>1</sub> = 0.1184, wR <sub>2</sub> = 0.2410              |
| Largest diff. peak/hole / e Å <sup>-3</sup>                        | 0.35/-0.35                                                     |

### V) $^1\text{H}$ and $^{13}\text{C}\{^1\text{H}\}$ NMR Spectra

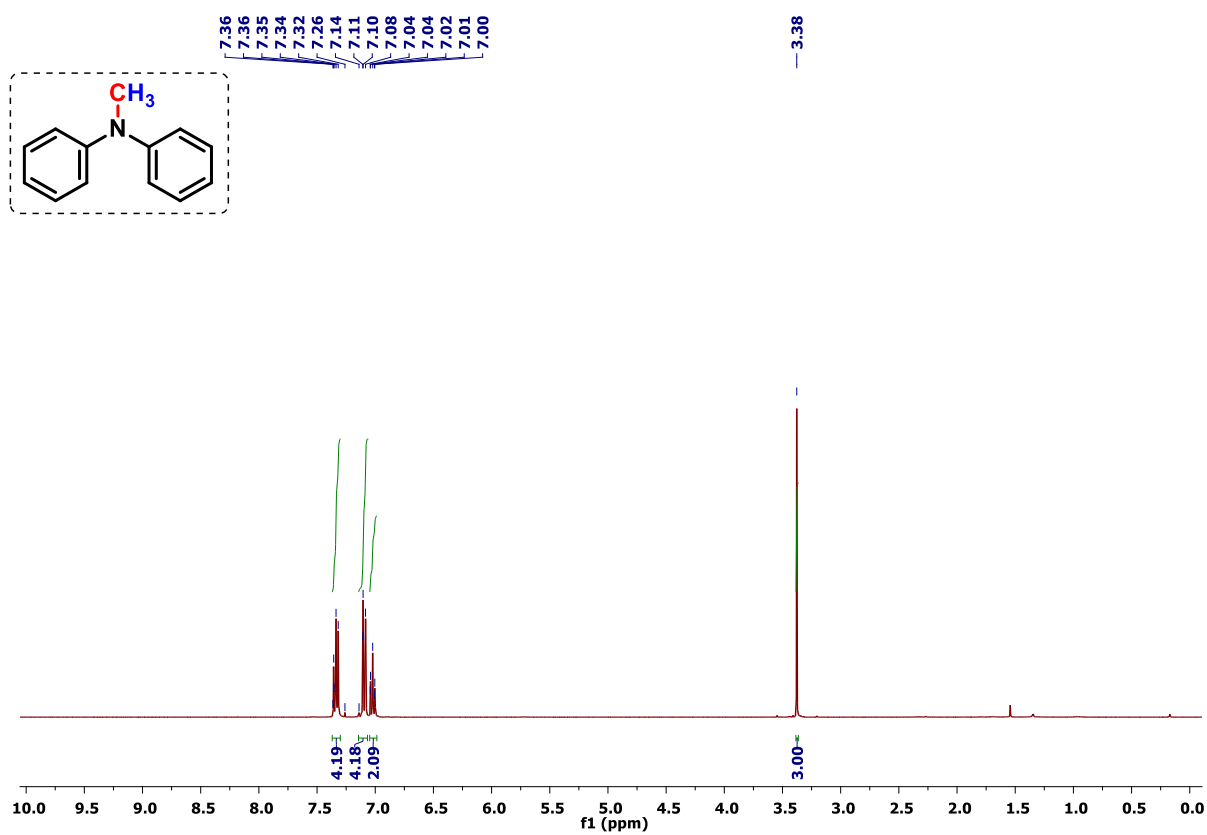

Figure S27.  $^1\text{H}$  NMR spectrum of **3a** in CDCl<sub>3</sub>.

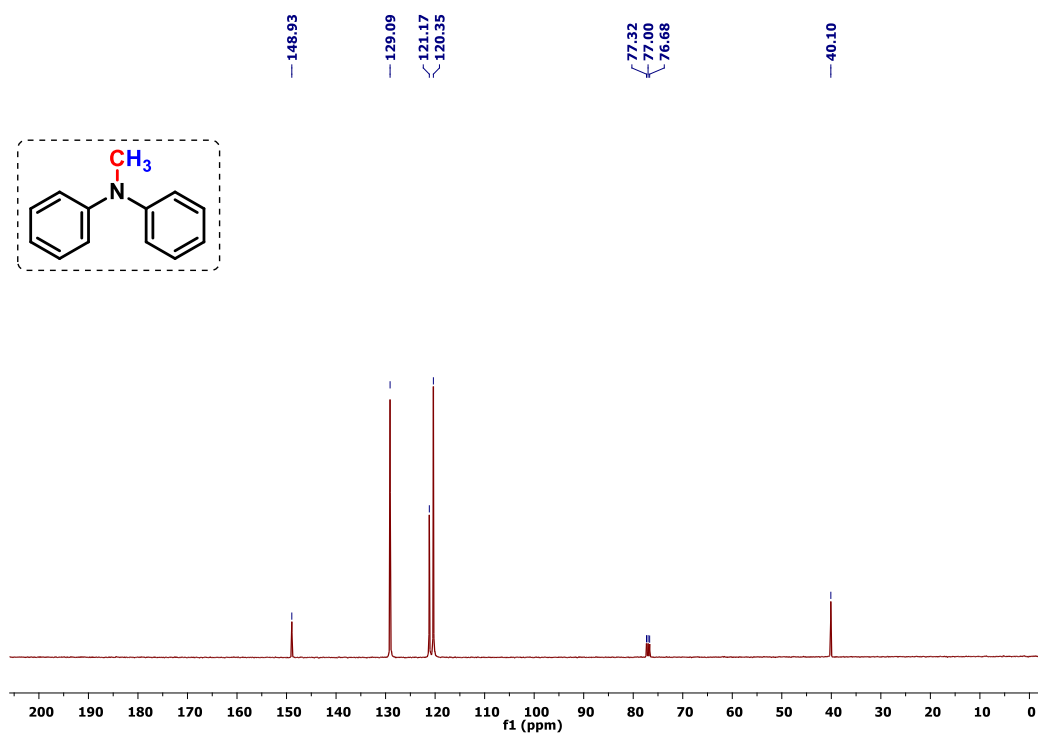

Figure S28.  $^{13}\text{C}\{^1\text{H}\}$  NMR spectrum of **3a** in CDCl<sub>3</sub>.

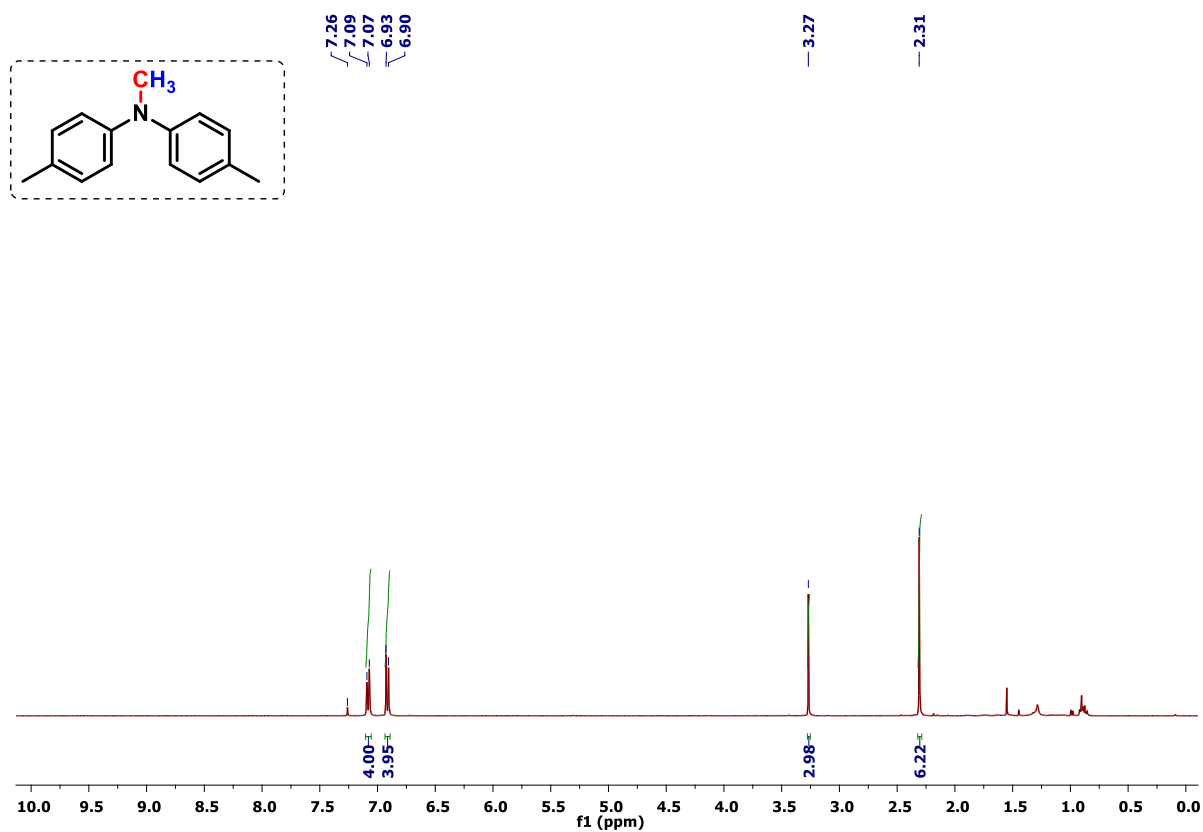

Figure S29.  $^1\text{H}$  NMR spectrum of **3b** in CDCl<sub>3</sub>.

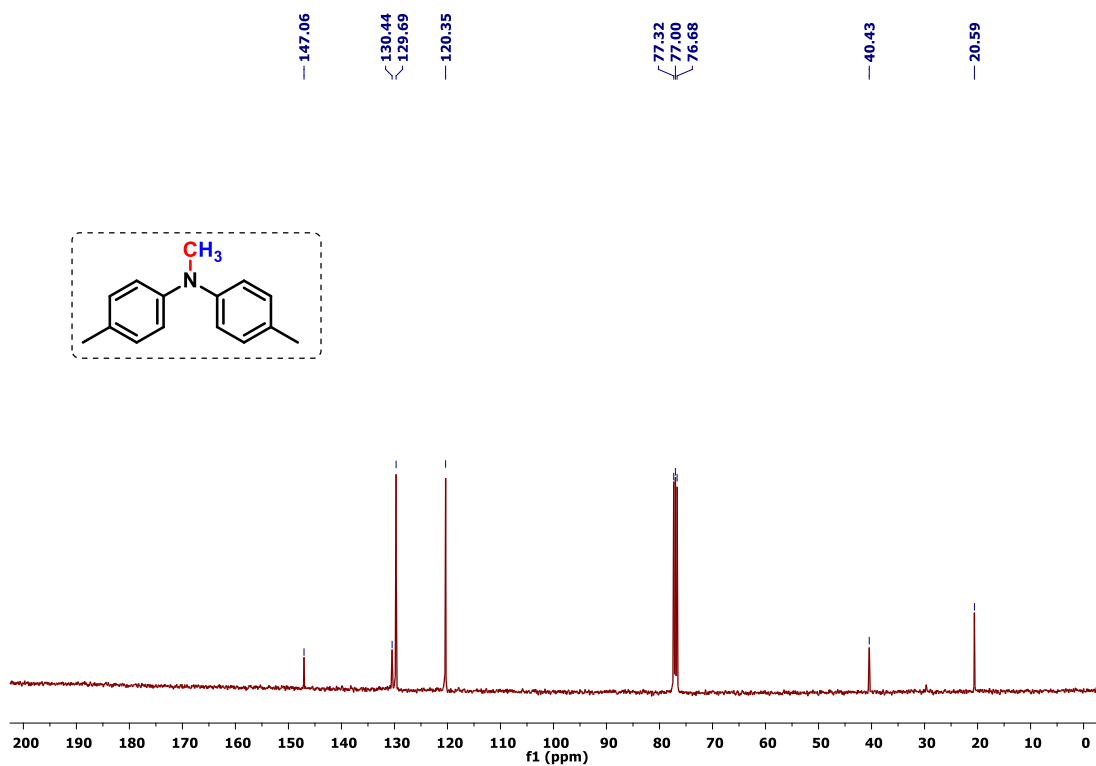

Figure S30.  $^{13}\text{C}\{^1\text{H}\}$  NMR spectrum of **3b** in CDCl<sub>3</sub>.



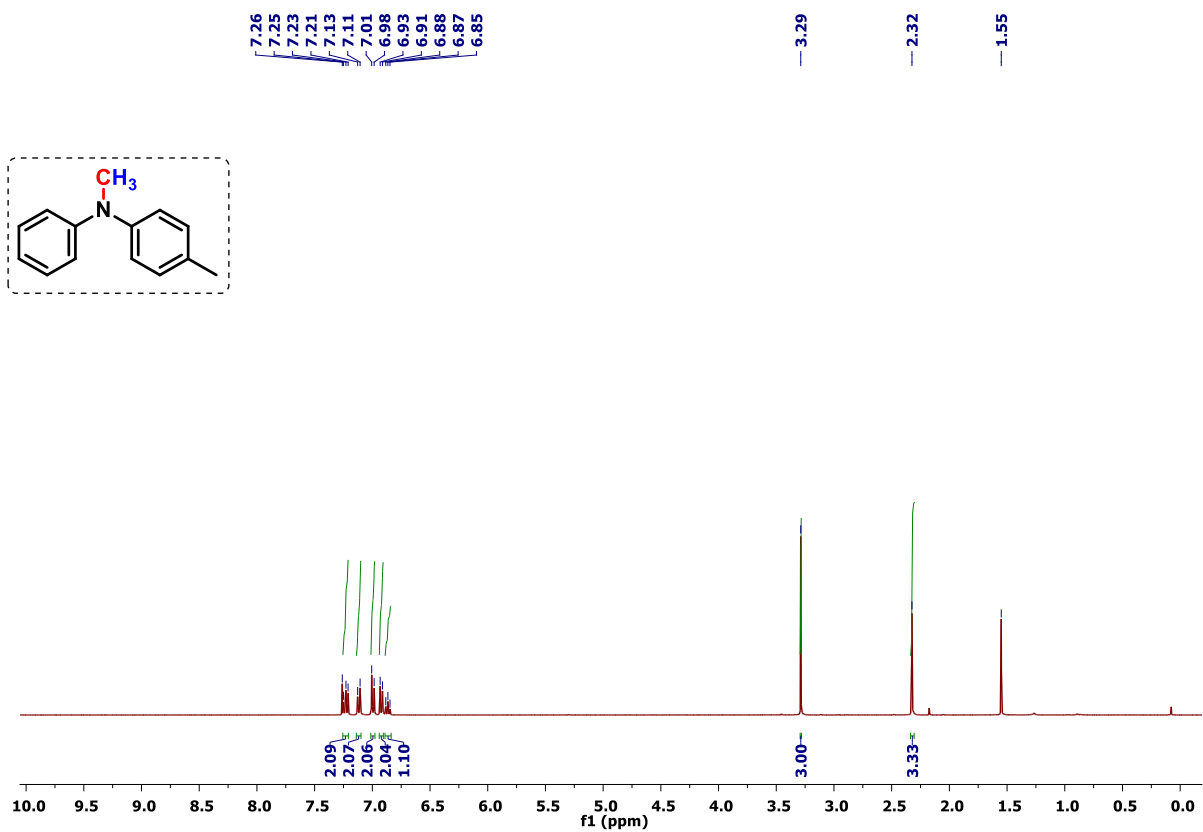

Figure S31. <sup>1</sup>H NMR spectrum **3c** in CDCl<sub>3</sub>.

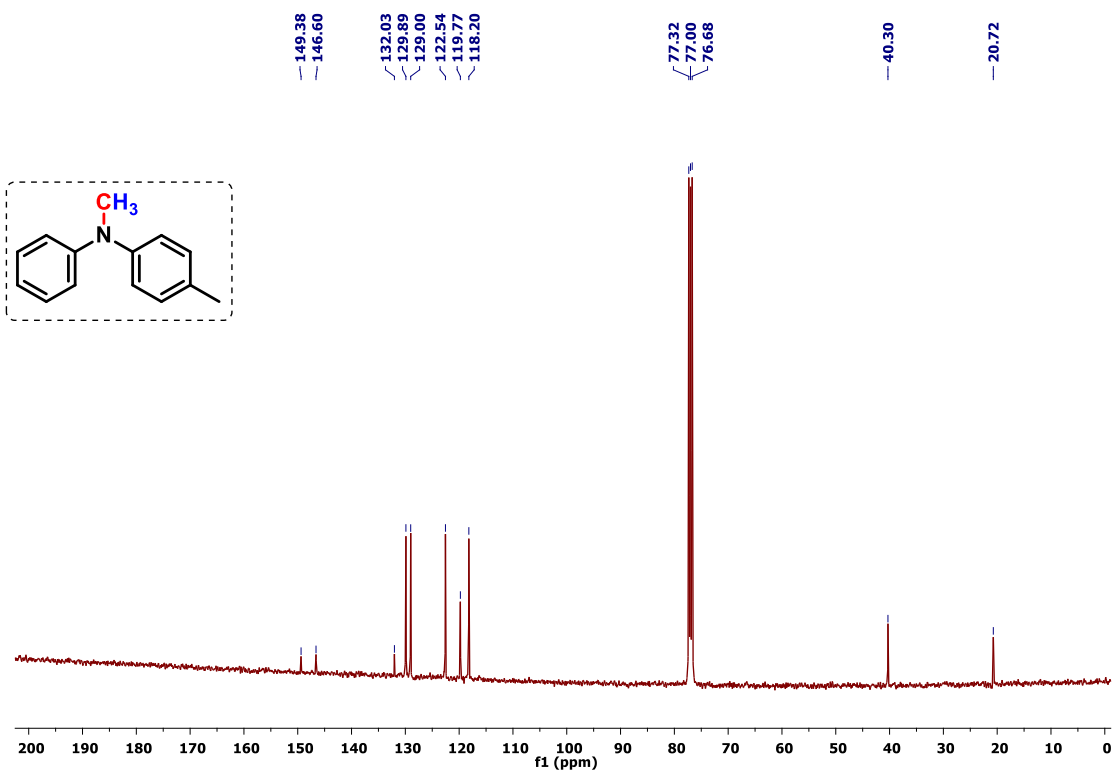

Figure S32. <sup>13</sup>C{<sup>1</sup>H} NMR spectrum of **3c** in CDCl<sub>3</sub>.

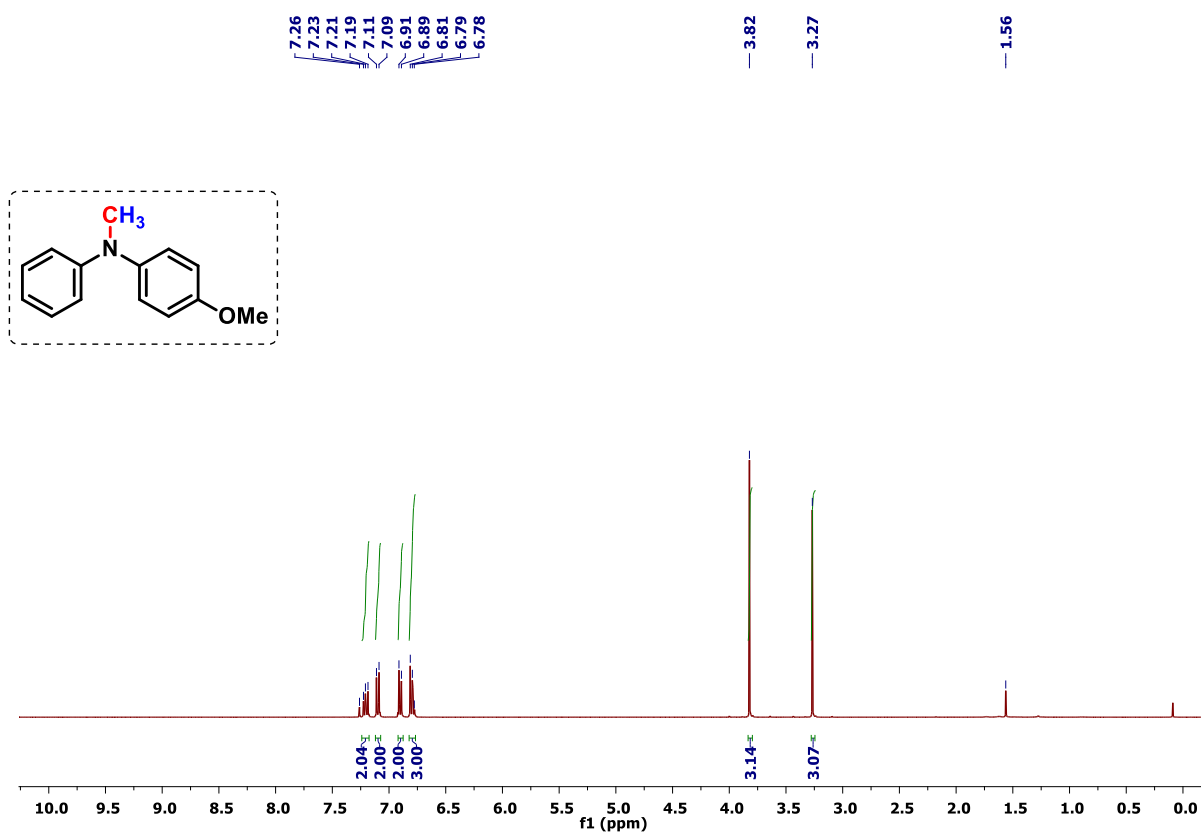

Figure S33.  $^1\text{H}$  NMR spectrum of **3d** in  $\text{CDCl}_3$ .

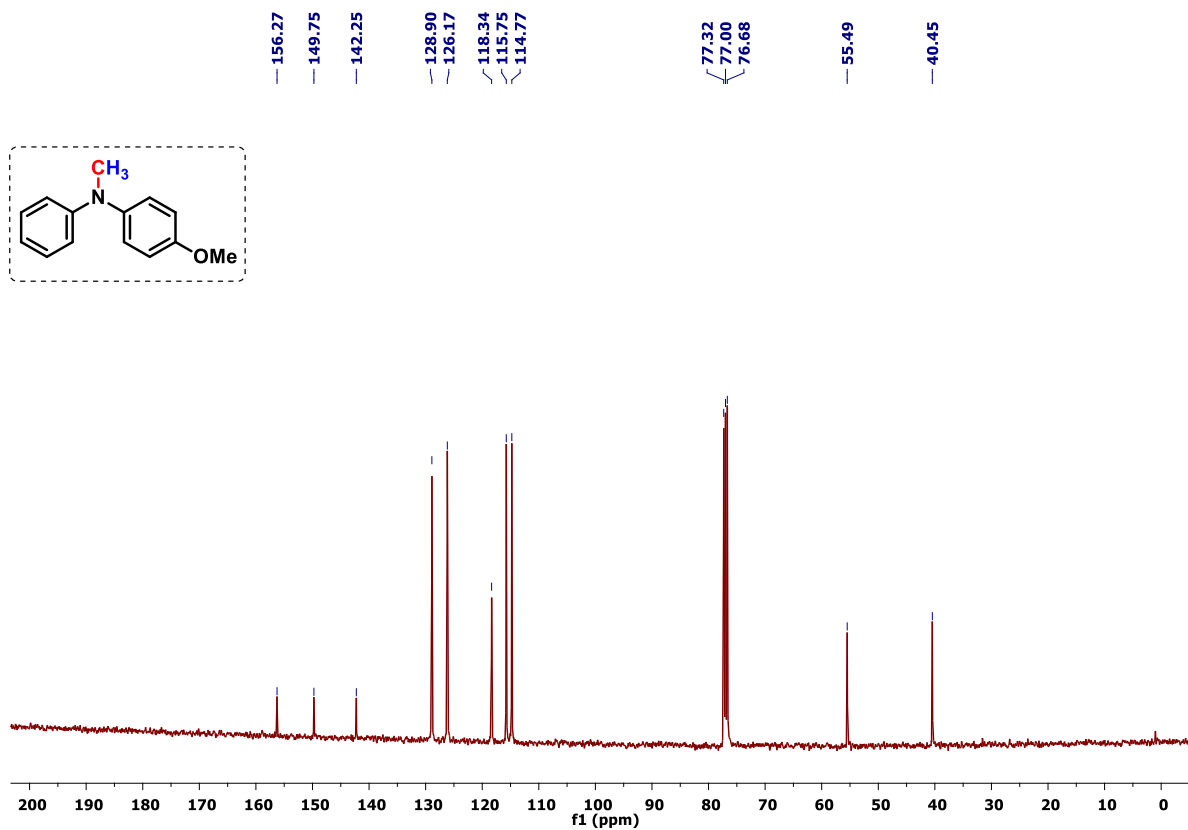

Figure S34.  $^{13}\text{C}\{^1\text{H}\}$  NMR spectrum of **3d** in  $\text{CDCl}_3$ .

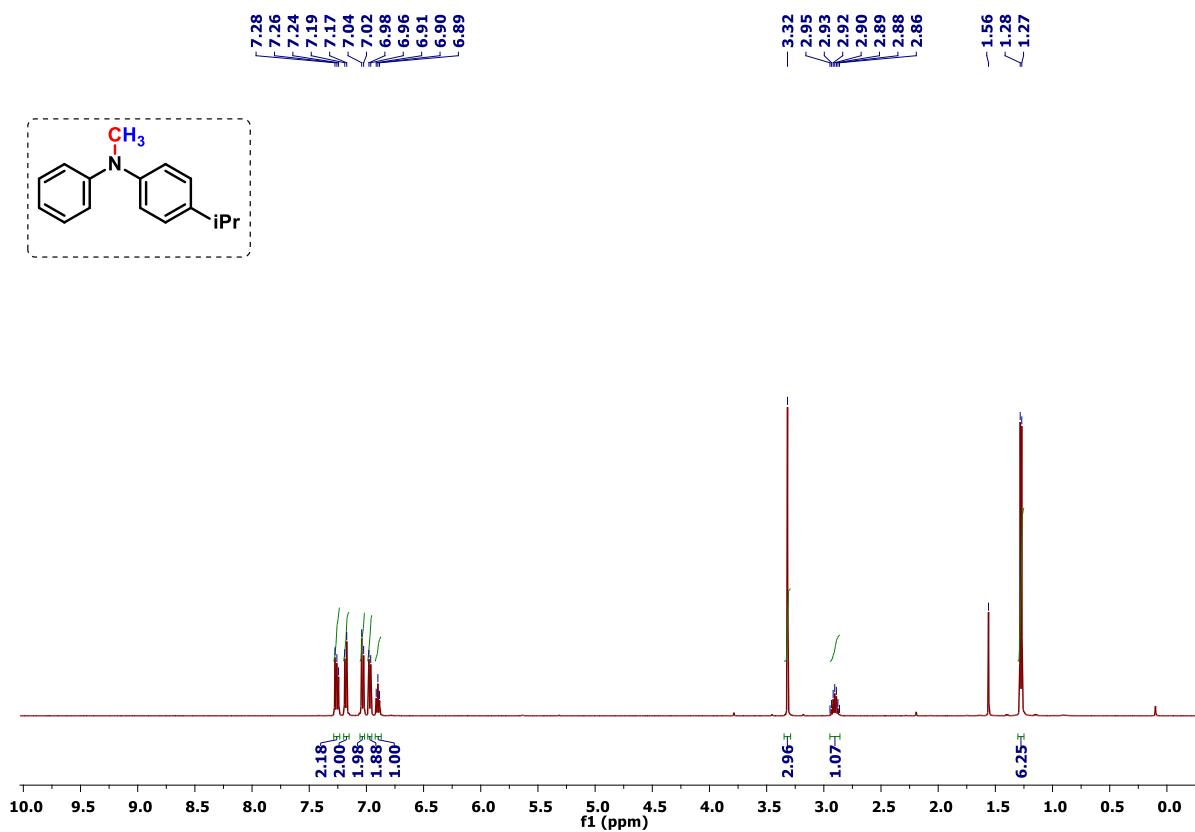

Figure S35.  $^1\text{H}$  NMR spectrum of **3e** in  $\text{CDCl}_3$ .

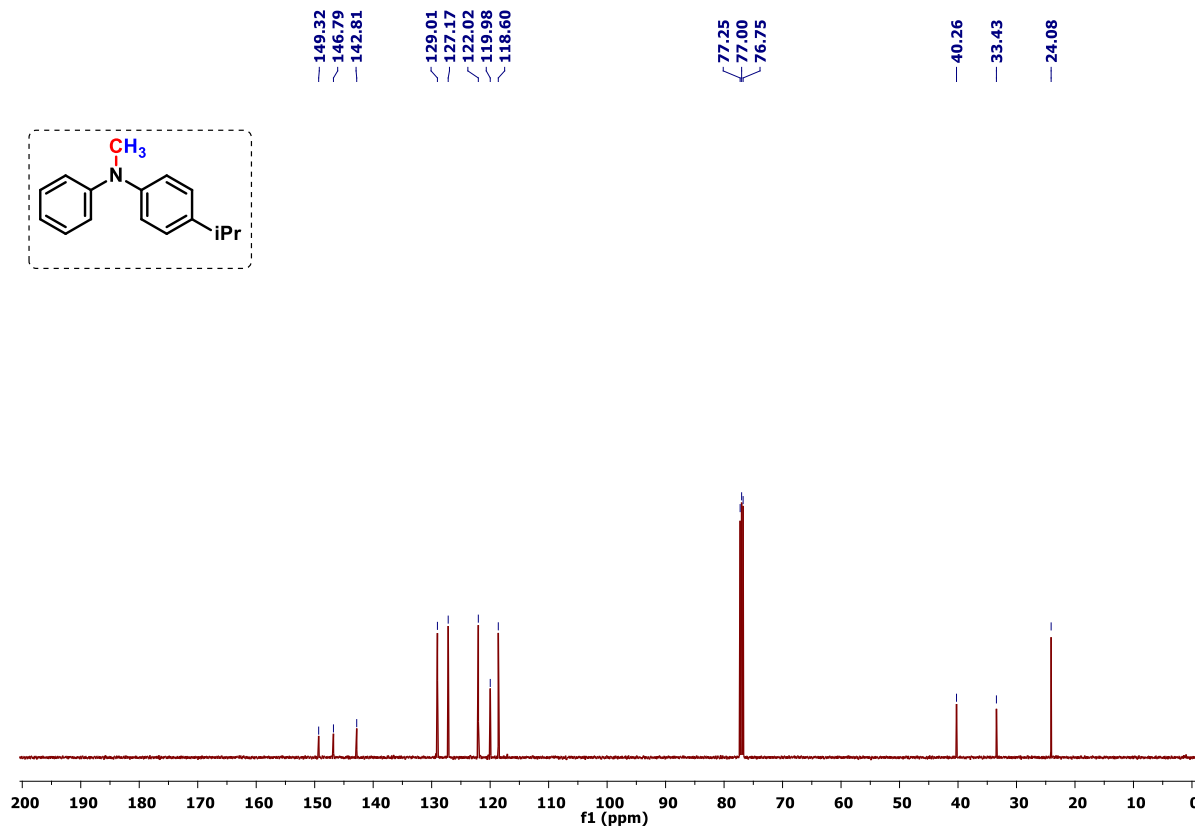

Figure S36.  $^{13}\text{C}\{^1\text{H}\}$  NMR spectrum of **3e** in  $\text{CDCl}_3$ .

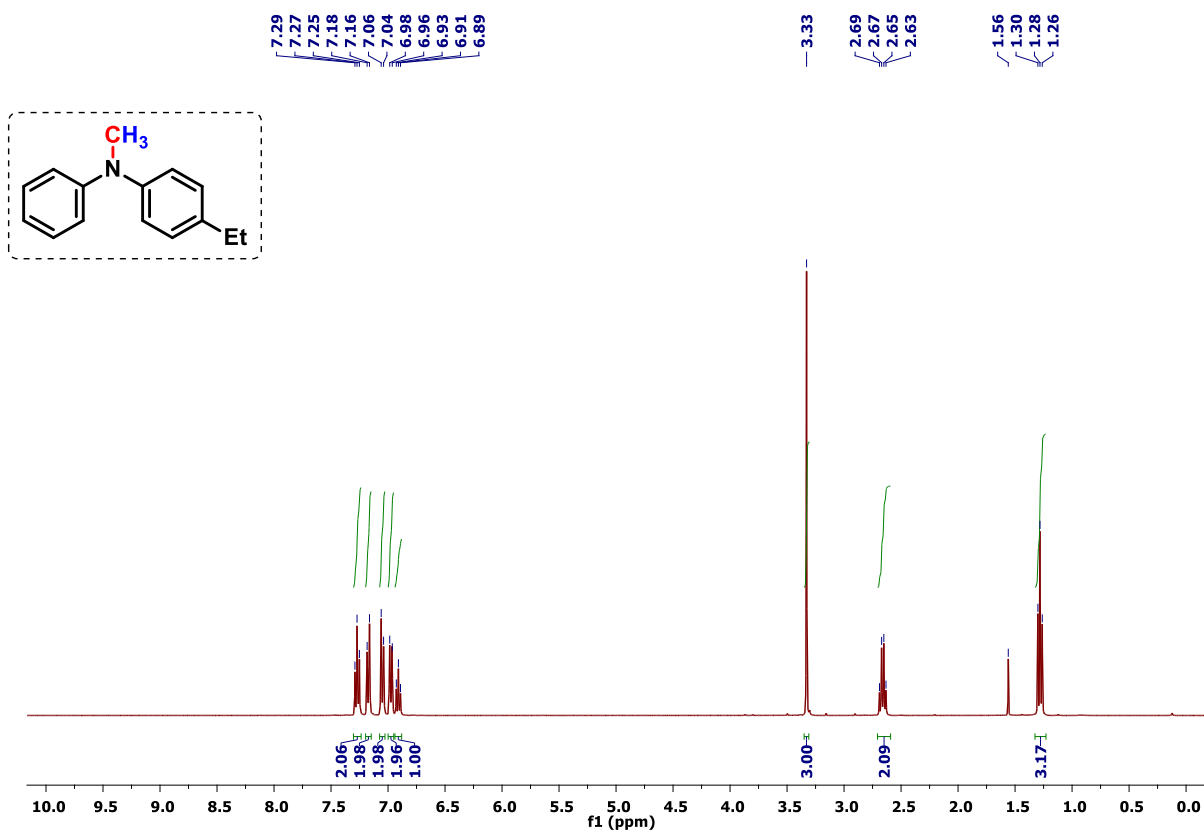

Figure S37.  $^1\text{H}$  NMR spectrum of **3f** in  $\text{CDCl}_3$ .

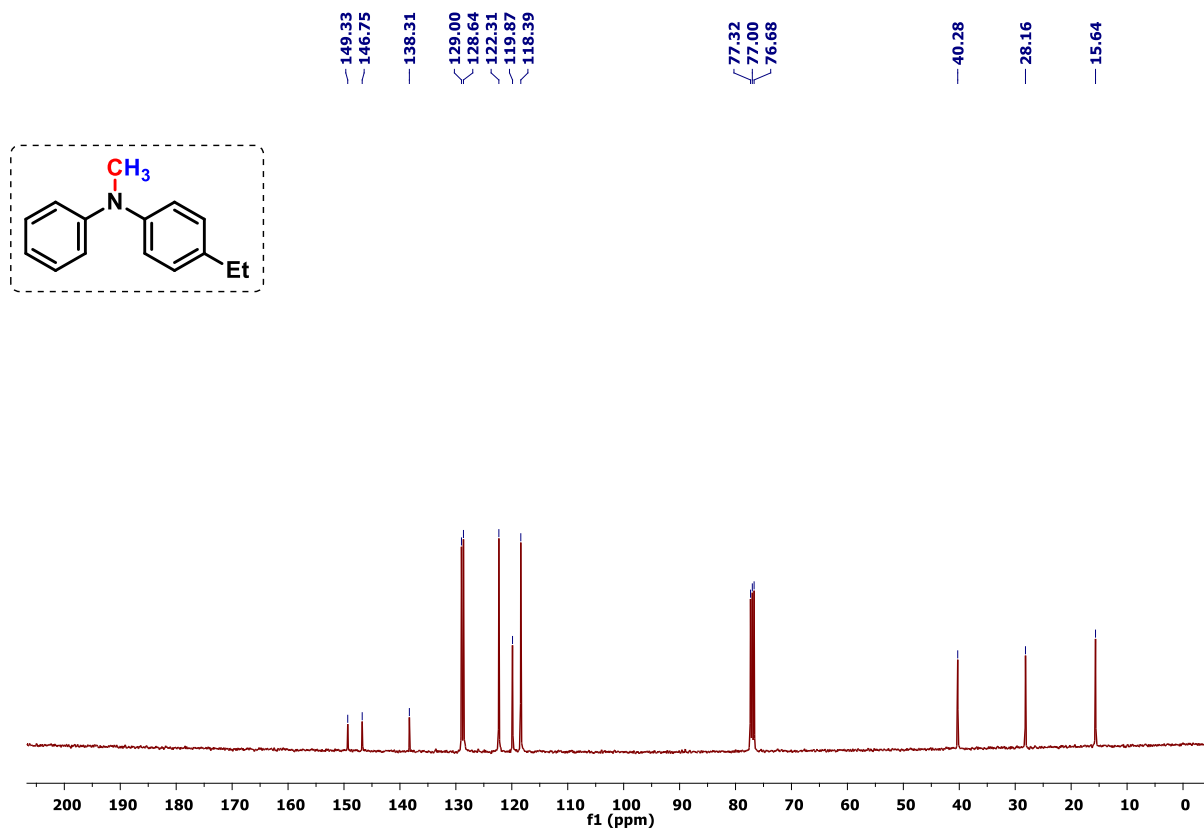

Figure S38.  $^{13}\text{C}\{^1\text{H}\}$  NMR spectrum of **3f** in  $\text{CDCl}_3$ .

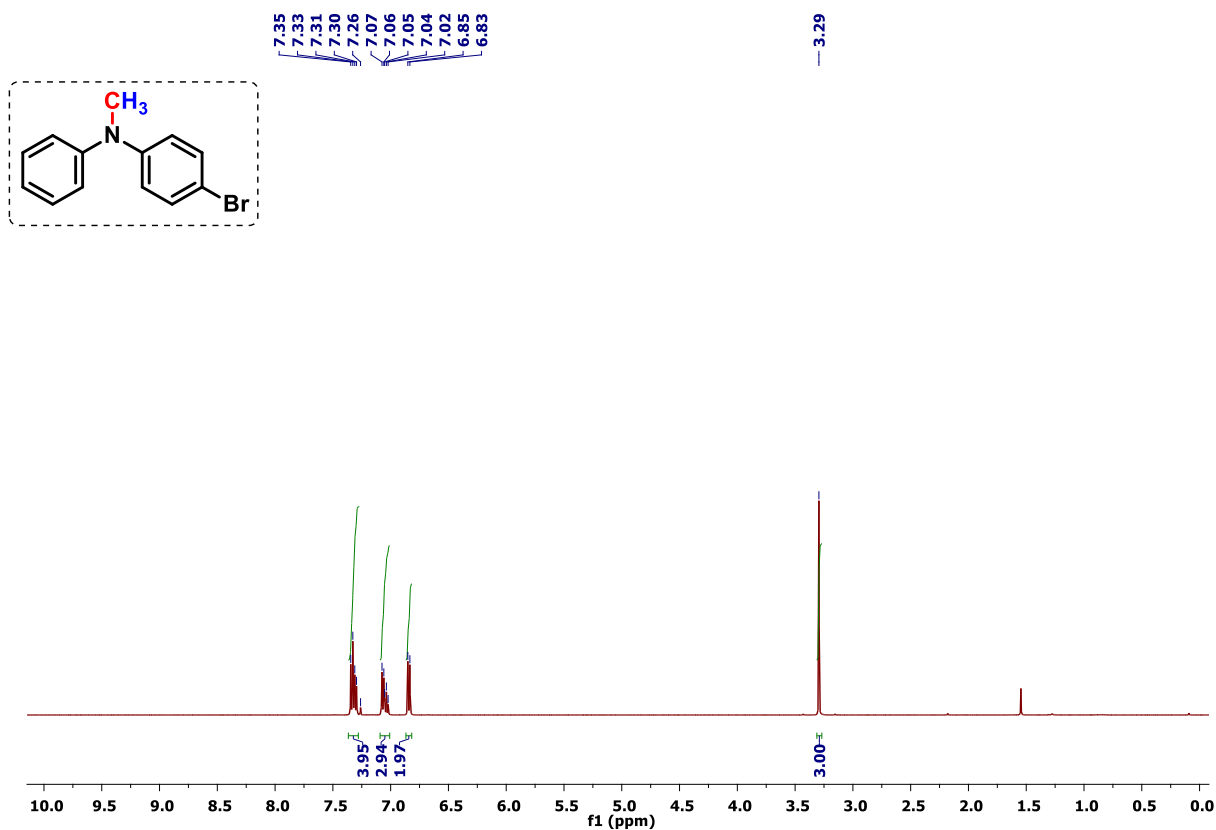

Figure S39.  $^1\text{H}$  NMR spectrum of **3g** in  $\text{CDCl}_3$ .

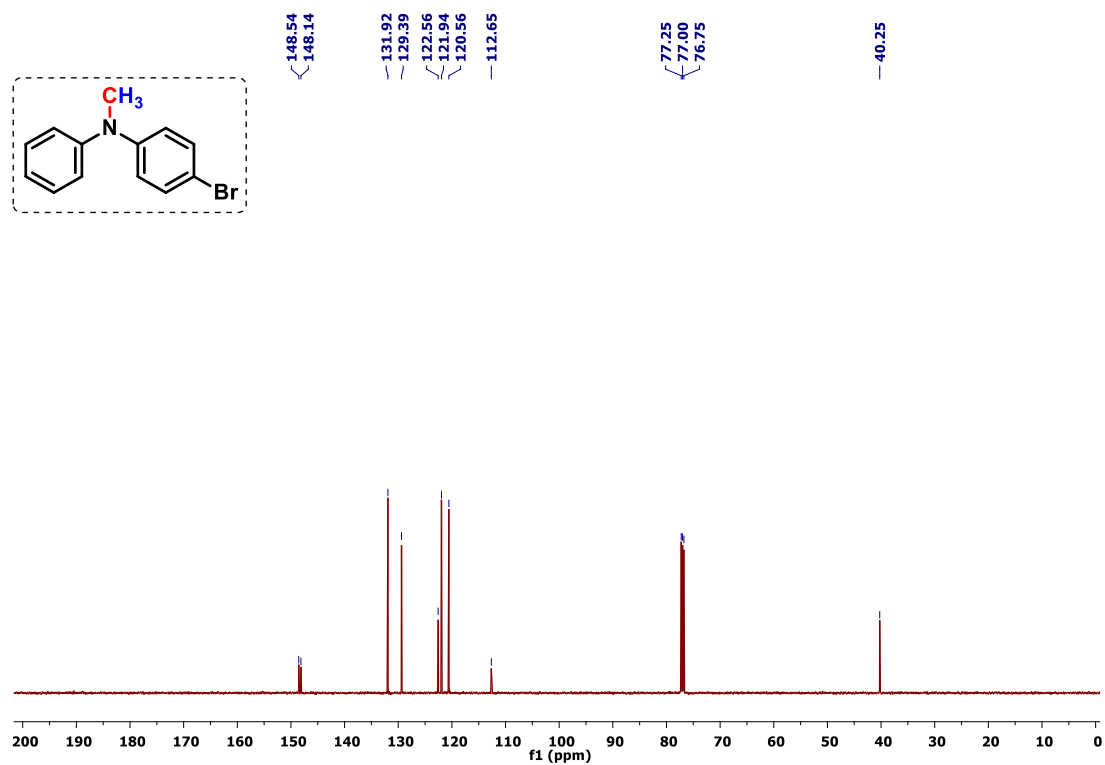

Figure S40.  $^{13}\text{C}\{^1\text{H}\}$  NMR spectrum of **3g** in  $\text{CDCl}_3$ .

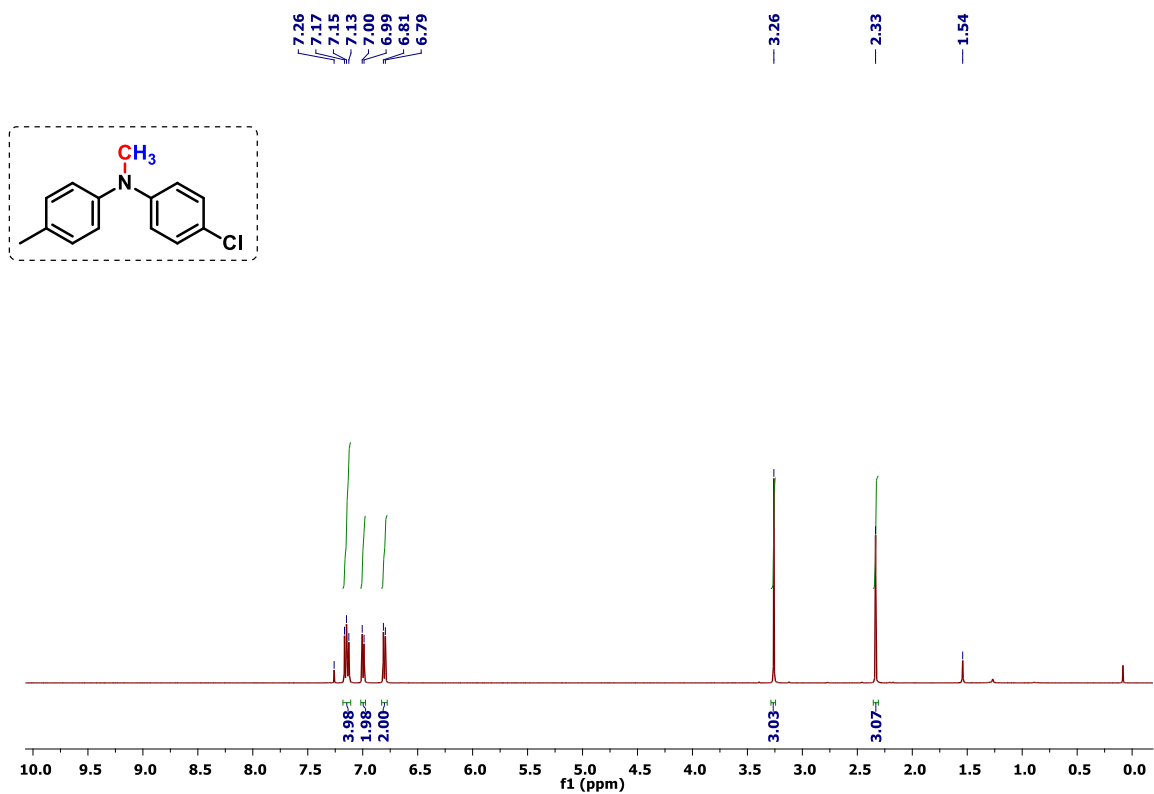

Figure S41.  $^1\text{H}$  NMR spectrum of **3h** in  $\text{CDCl}_3$ .

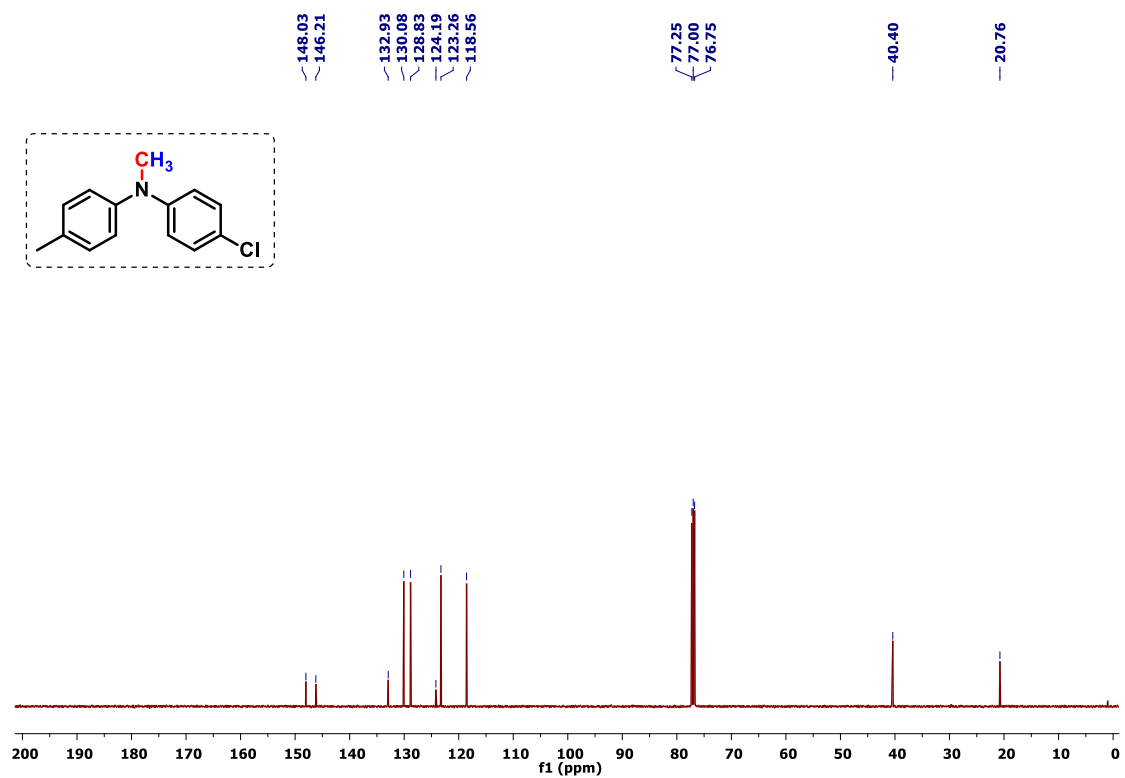

Figure S42.  $^{13}\text{C}\{^1\text{H}\}$  NMR spectrum of **3h** in  $\text{CDCl}_3$ .

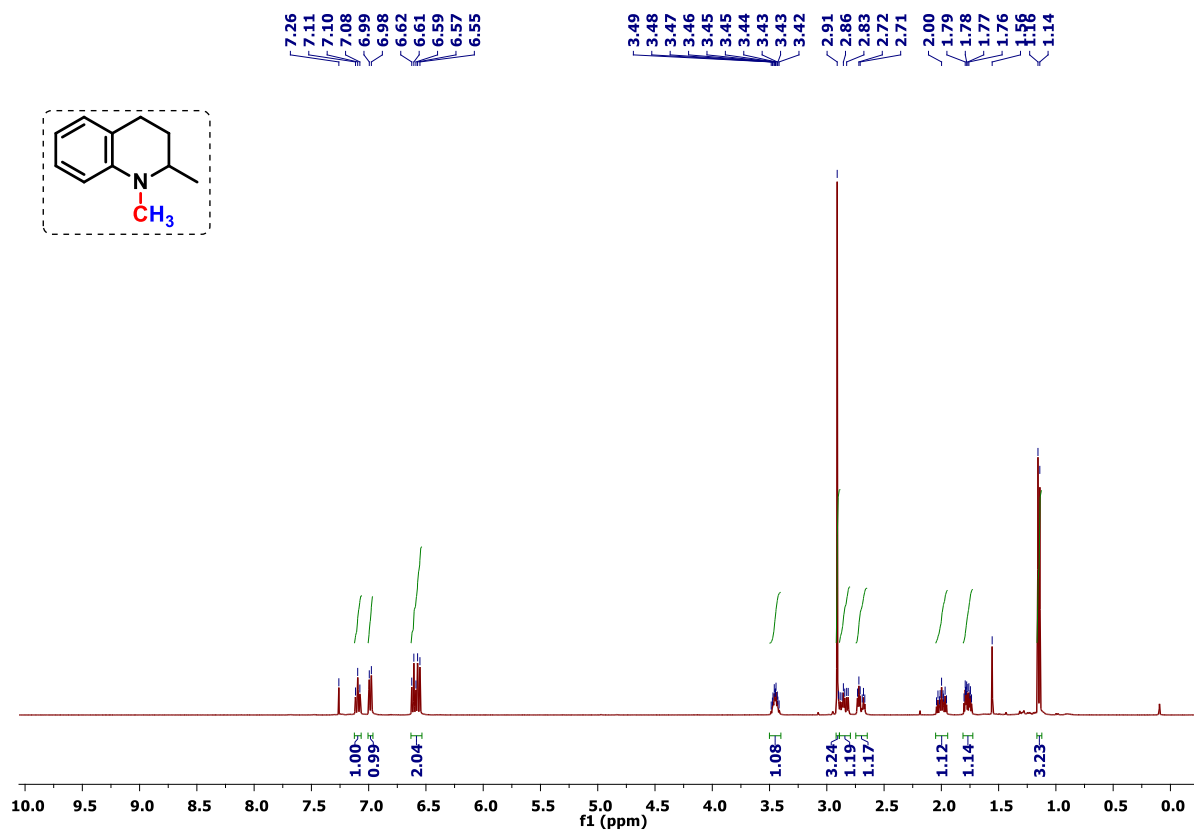

Figure S43.  $^1\text{H}$  NMR spectrum of **3i** in  $\text{CDCl}_3$ .

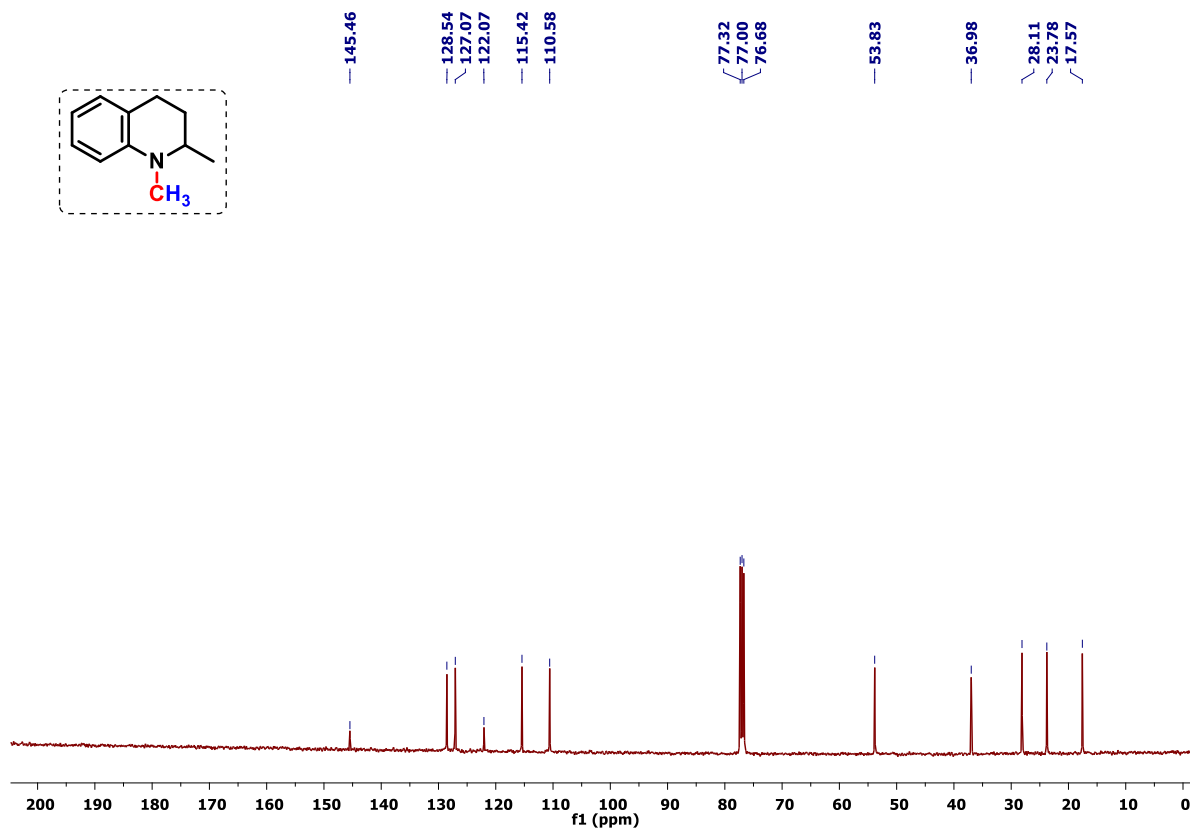

Figure. S44.  $^{13}\text{C}\{^1\text{H}\}$  NMR spectrum of **3i** in  $\text{CDCl}_3$ .

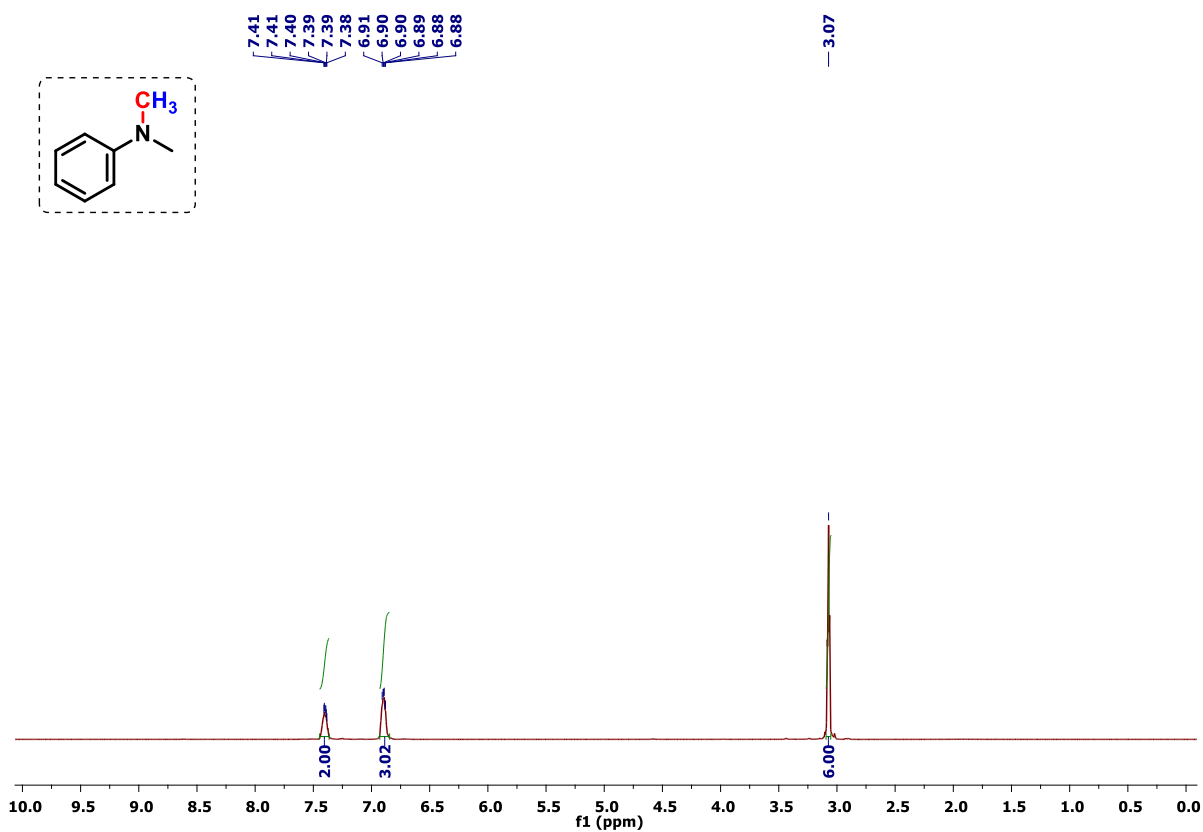

Figure S45.  $^1\text{H}$  NMR spectrum of **3j** in  $\text{CDCl}_3$ .

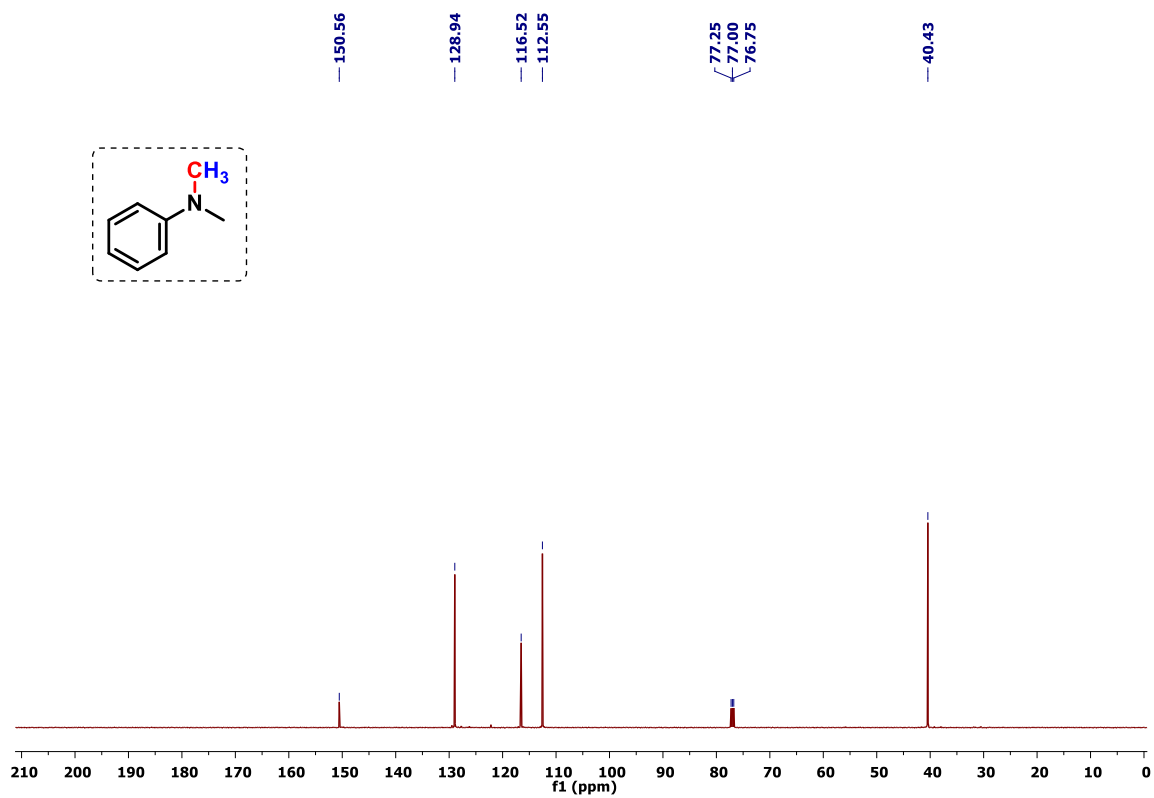

Figure S46.  $^{13}\text{C}\{^1\text{H}\}$  NMR spectrum of **3j** in  $\text{CDCl}_3$ .



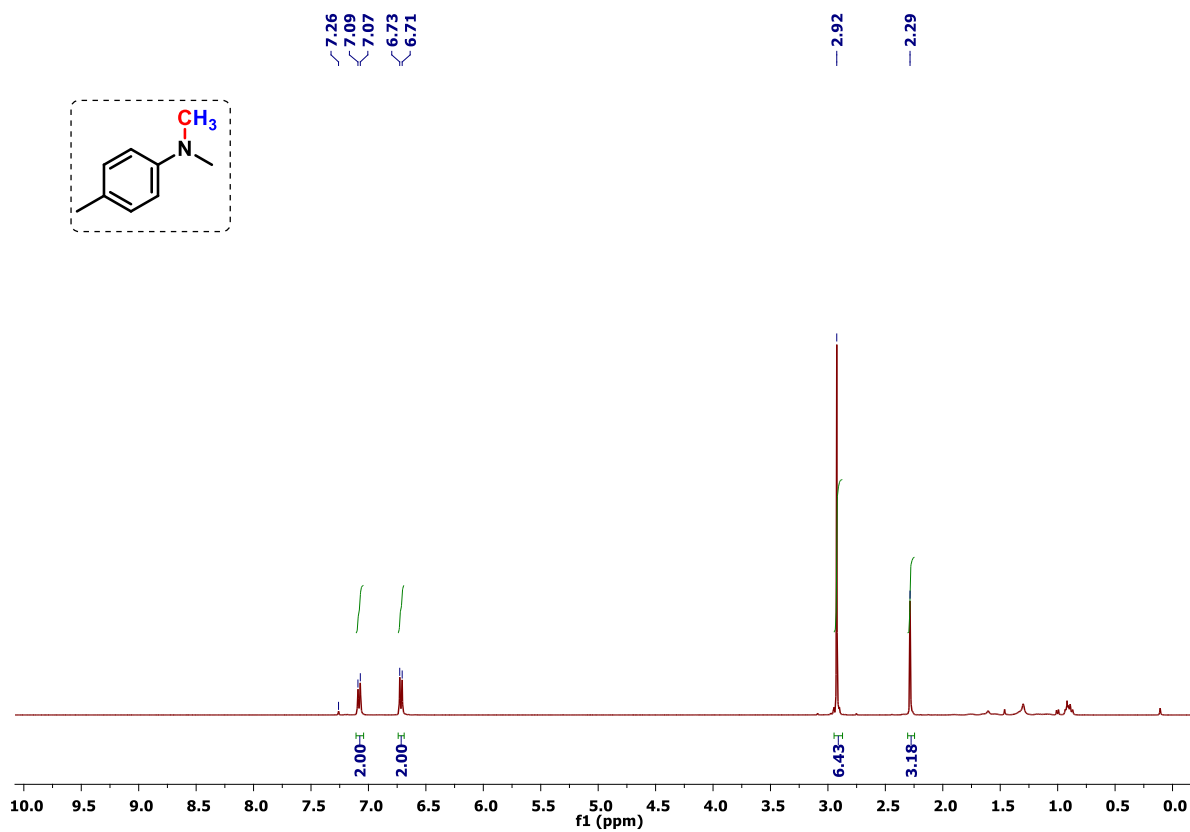

Figure S47.  $^1\text{H}$  NMR spectrum of **3k** in  $\text{CDCl}_3$ .

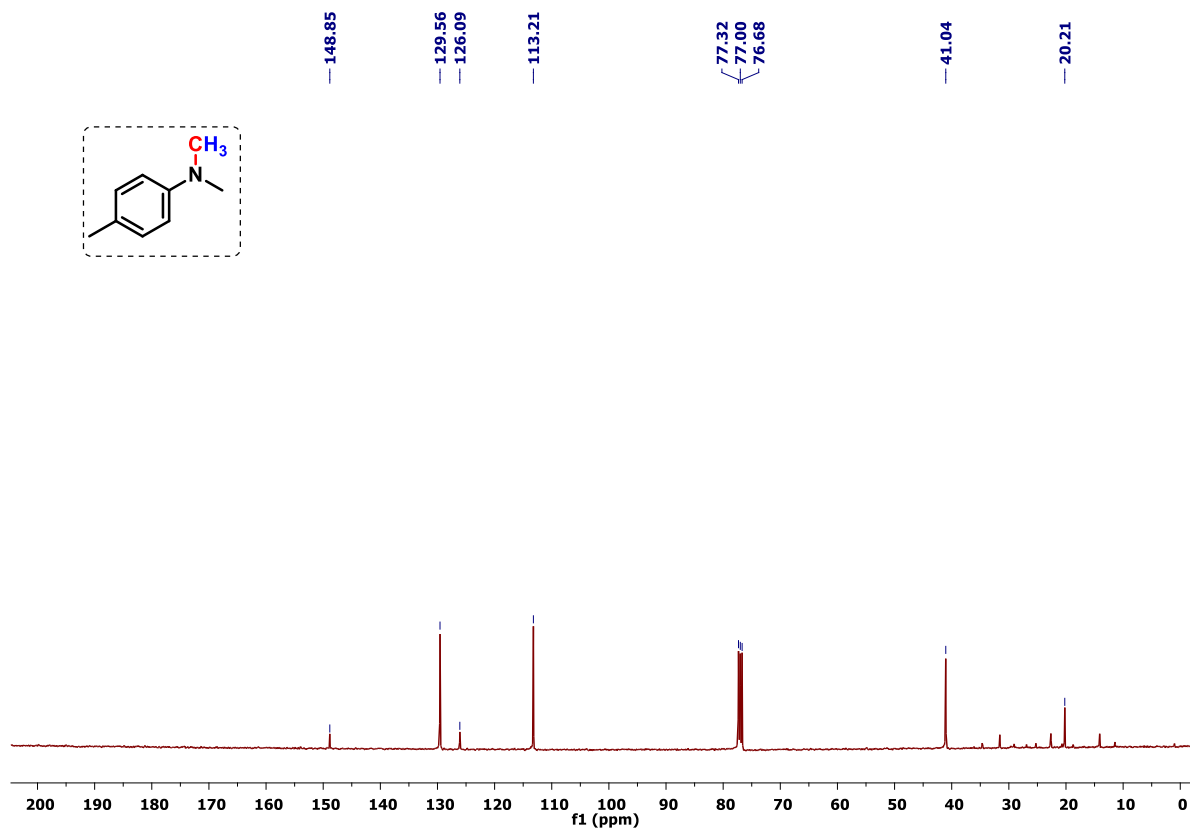

Figure S48.  $^{13}\text{C}\{^1\text{H}\}$  NMR spectrum of **3k** in  $\text{CDCl}_3$ .

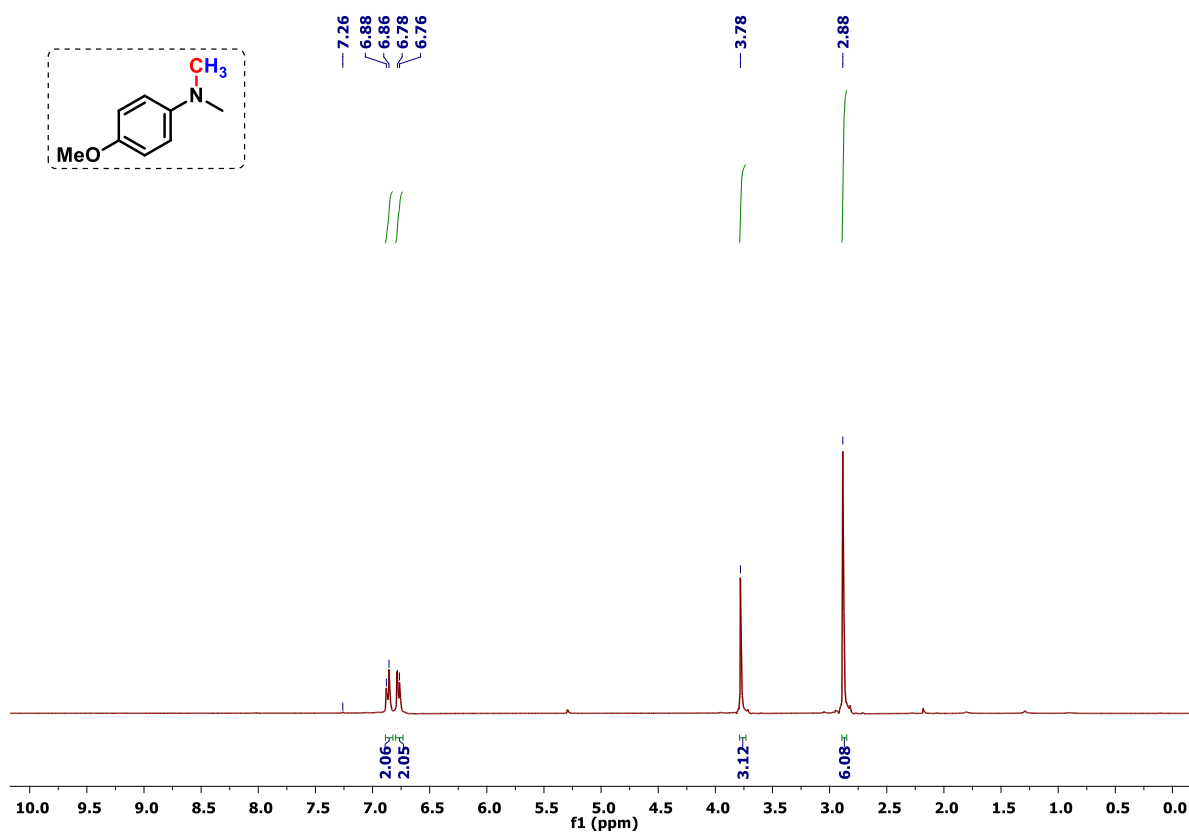

Figure S49.  $^1\text{H}$  NMR spectrum of **3I** in  $\text{CDCl}_3$ .

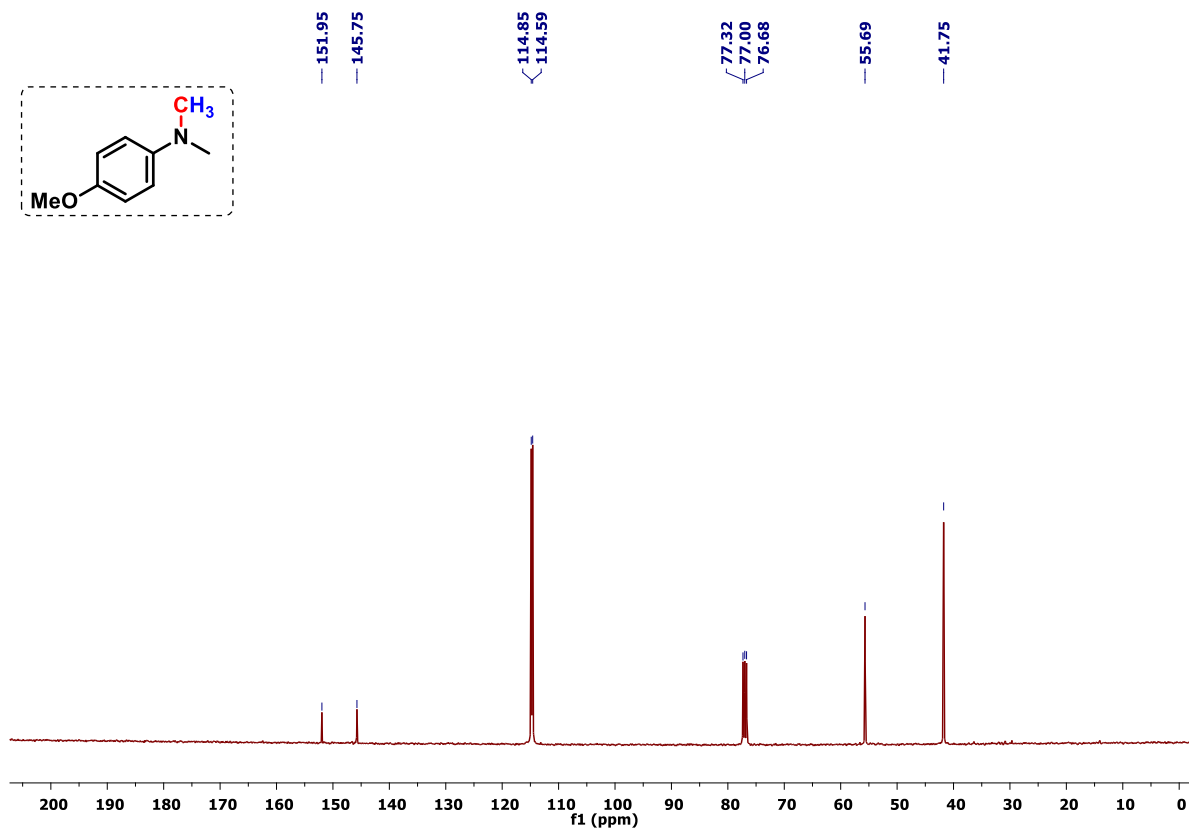

Figure S50.  $^{13}\text{C}\{^1\text{H}\}$  NMR spectrum of **3I** in  $\text{CDCl}_3$ .

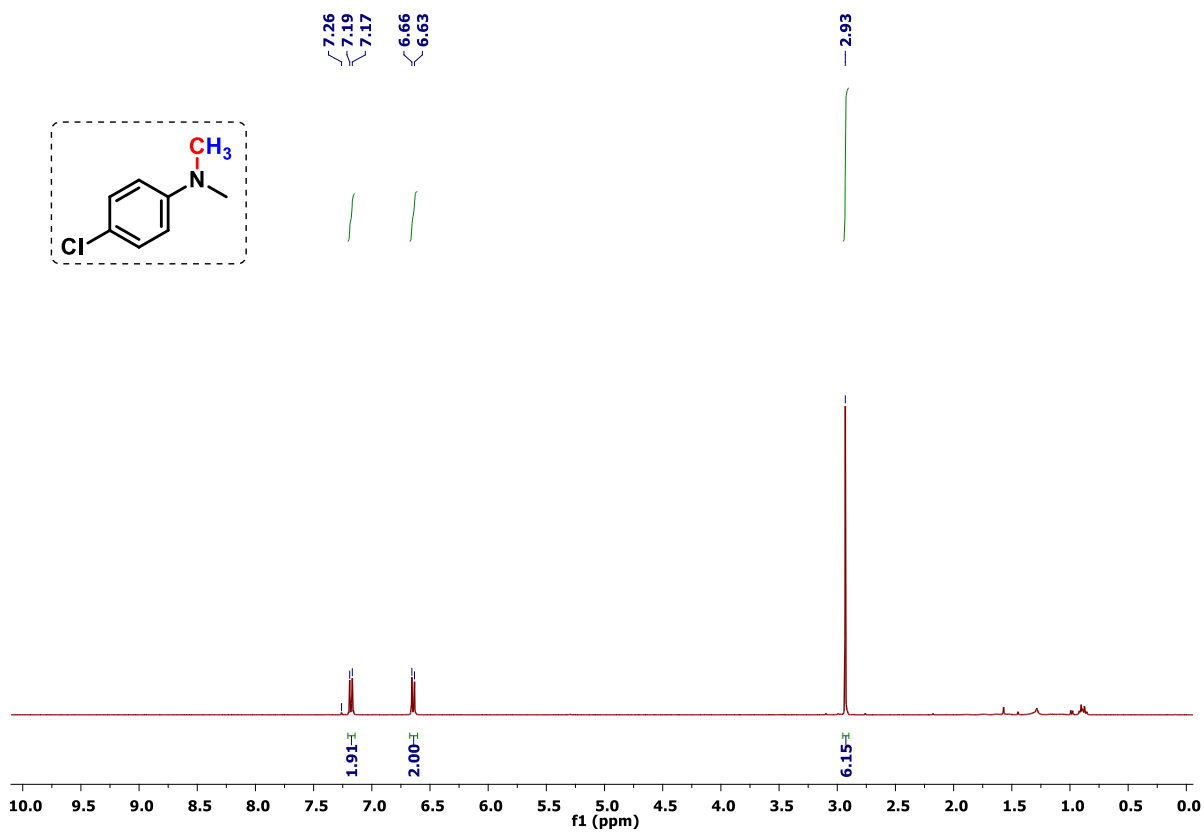

Figure S51.  $^1\text{H}$  NMR spectrum of **3m** in  $\text{CDCl}_3$ .

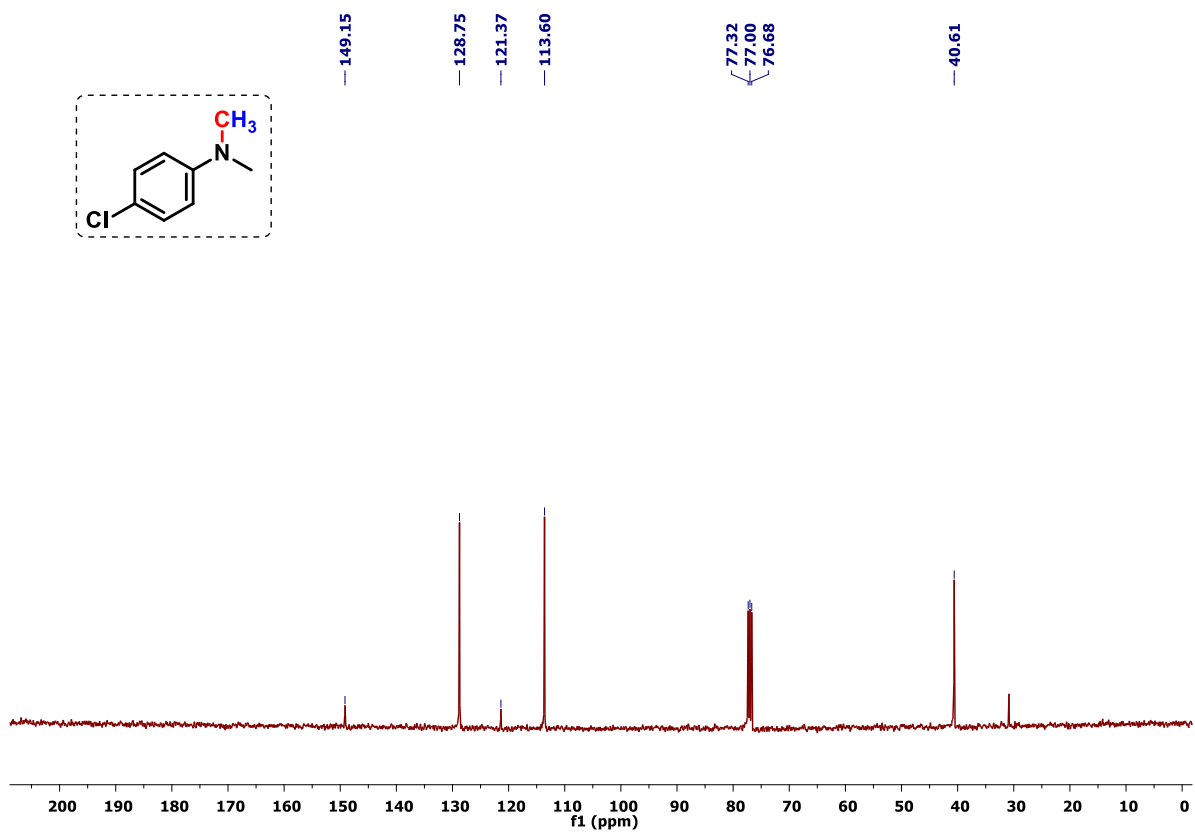

Figure S52.  $^{13}\text{C}\{^1\text{H}\}$  NMR spectrum of **3m** in  $\text{CDCl}_3$ .

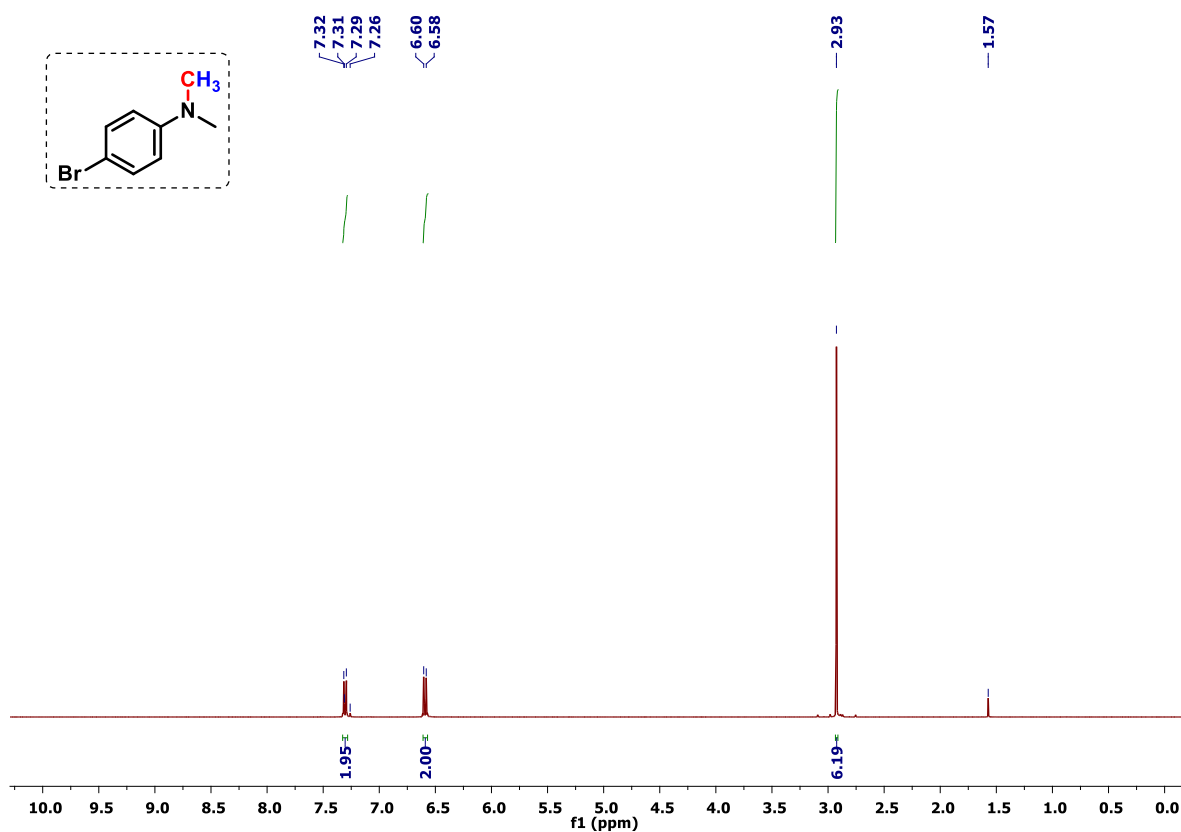

Figure S53. <sup>1</sup>H NMR spectrum of **3n** in CDCl<sub>3</sub>.

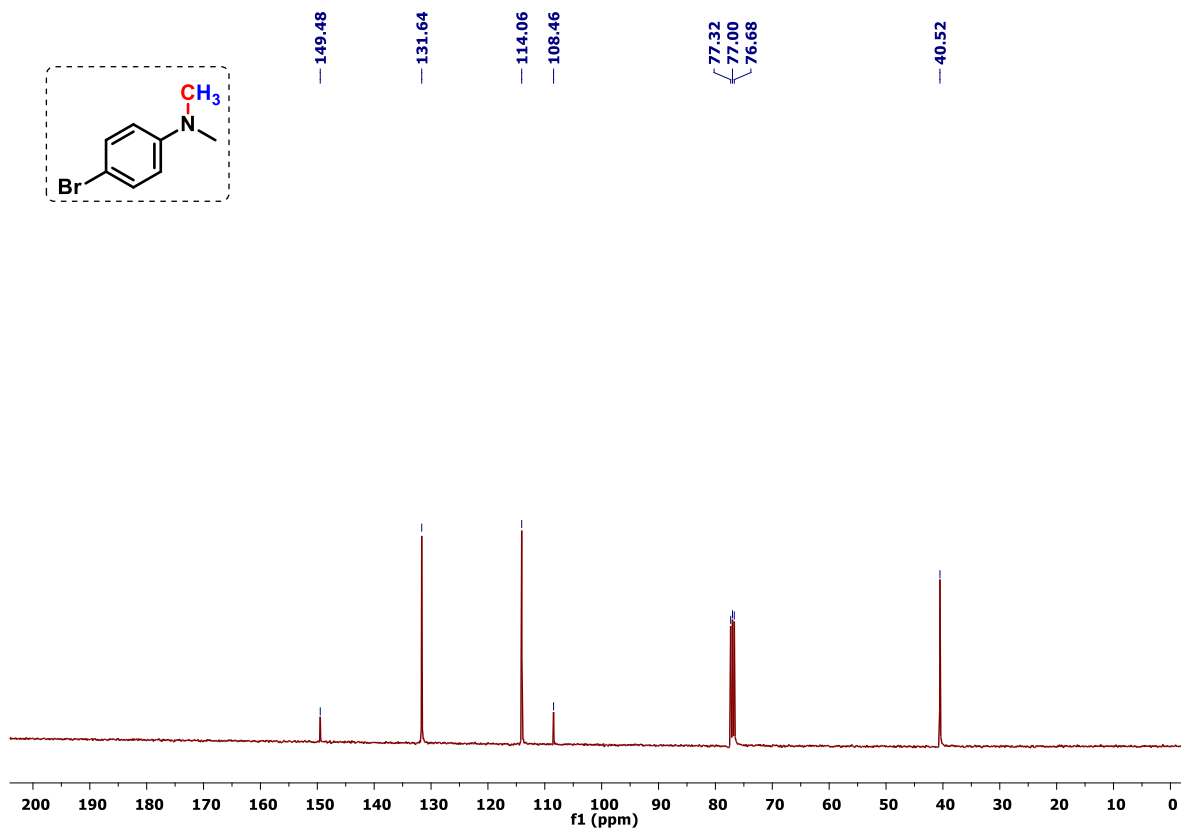

Figure S54. <sup>13</sup>C{<sup>1</sup>H} NMR spectrum of **3n** in CDCl<sub>3</sub>.

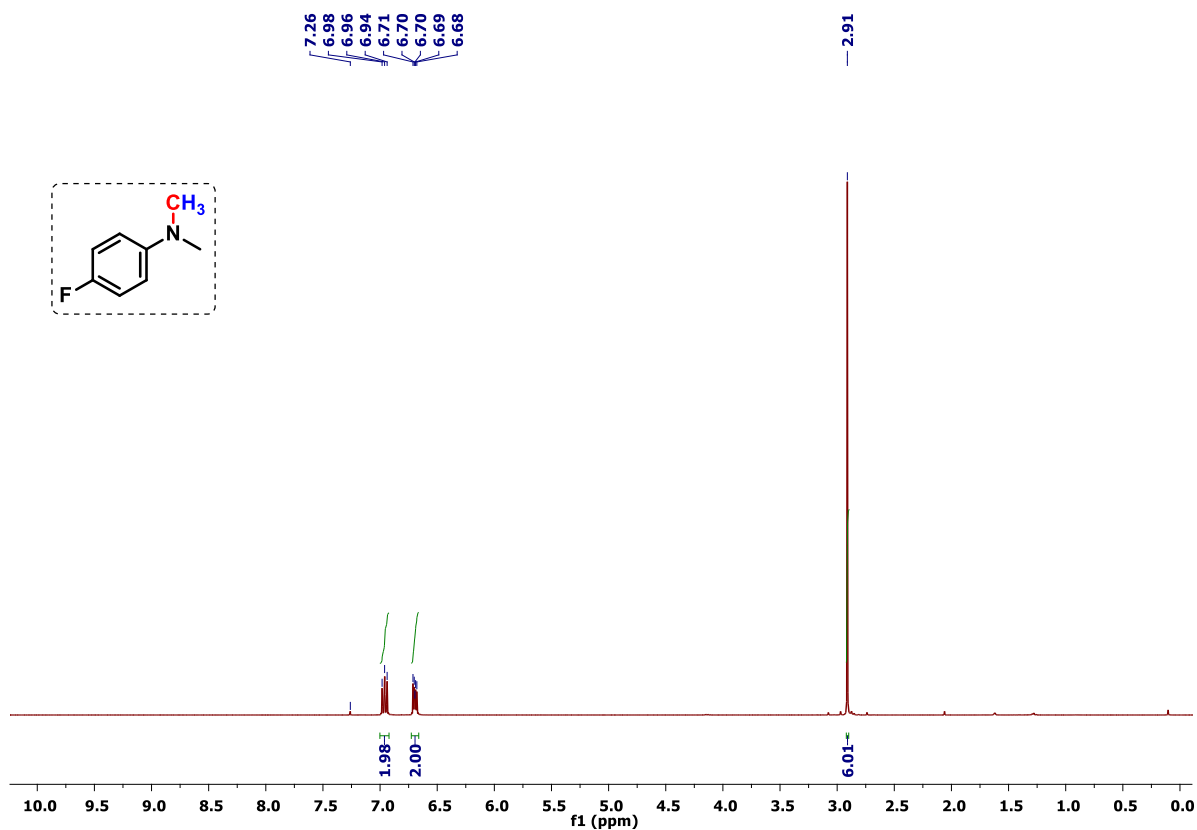

Figure S55.  $^1\text{H}$  NMR spectrum of **30** in  $\text{CDCl}_3$ .

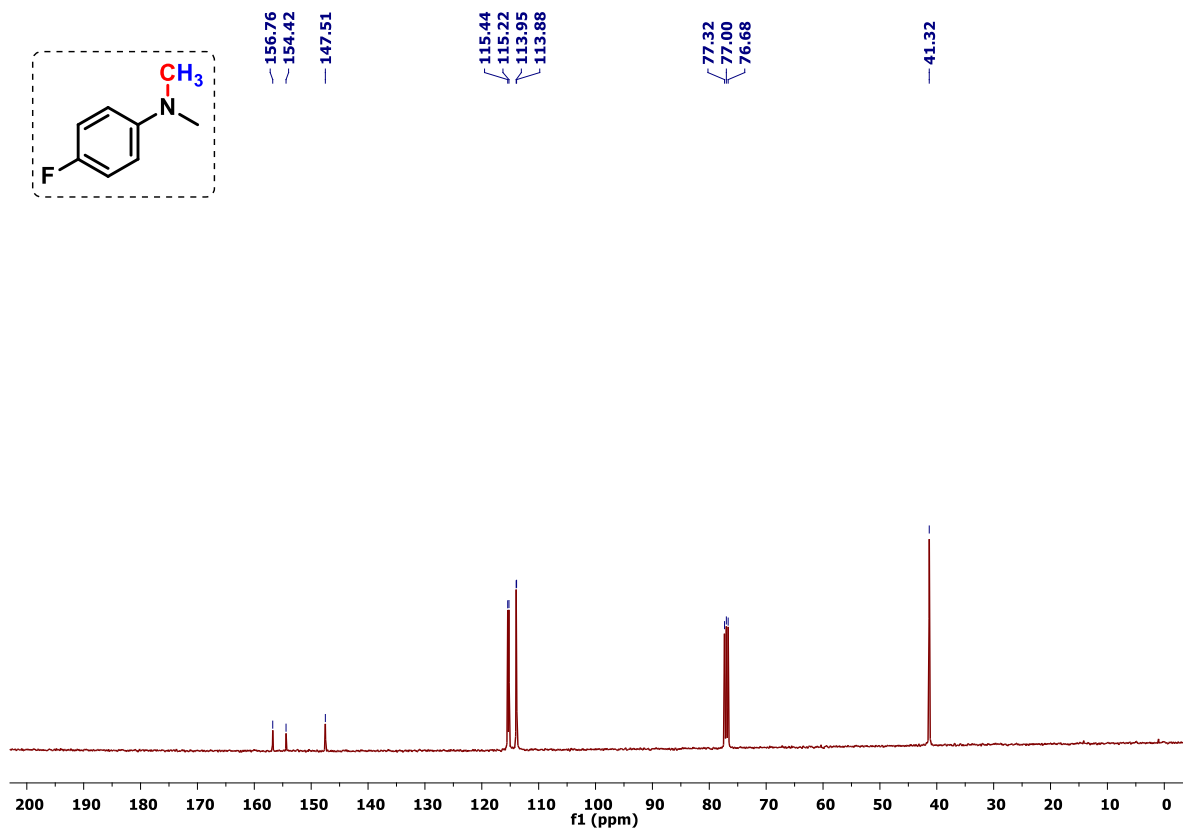

Figure S56.  $^{13}\text{C}\{^1\text{H}\}$  NMR spectrum of **30** in  $\text{CDCl}_3$ .

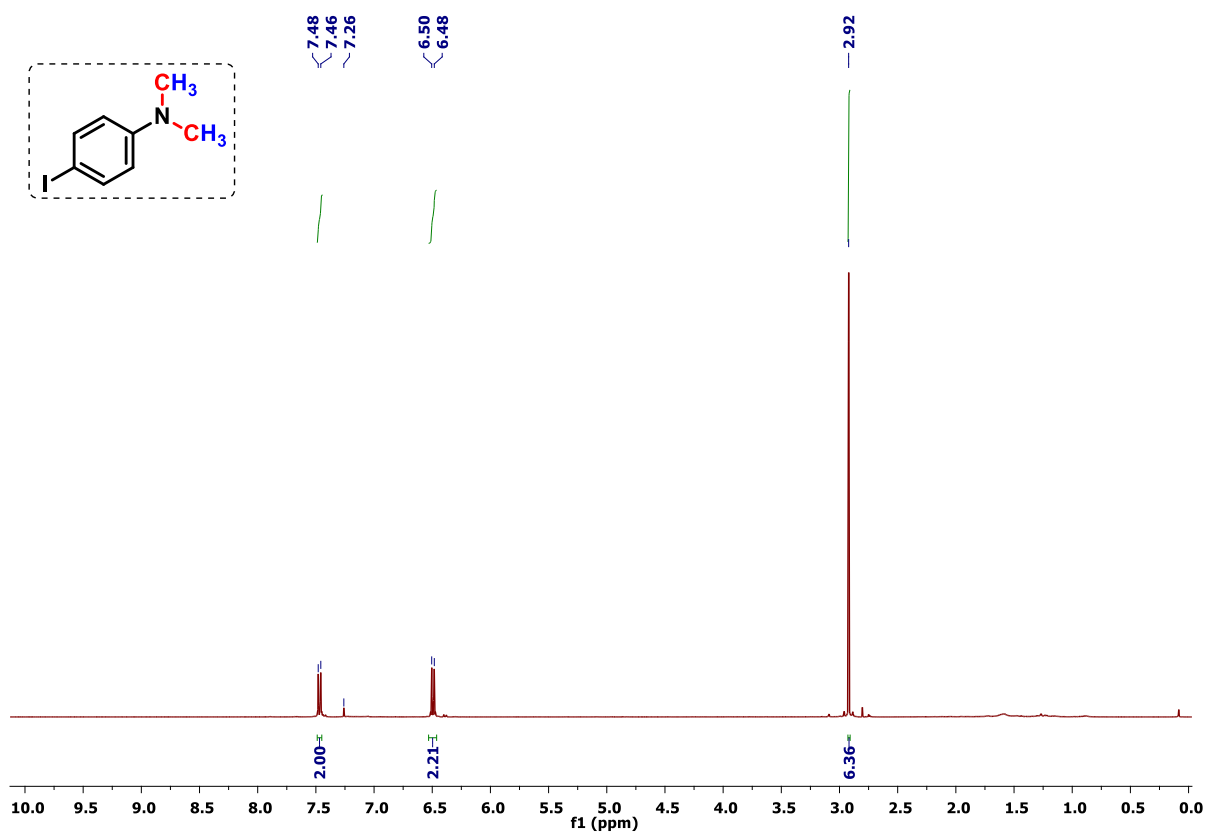

Figure S57.  $^1\text{H}$  NMR spectrum of **5a** in  $\text{CDCl}_3$ .

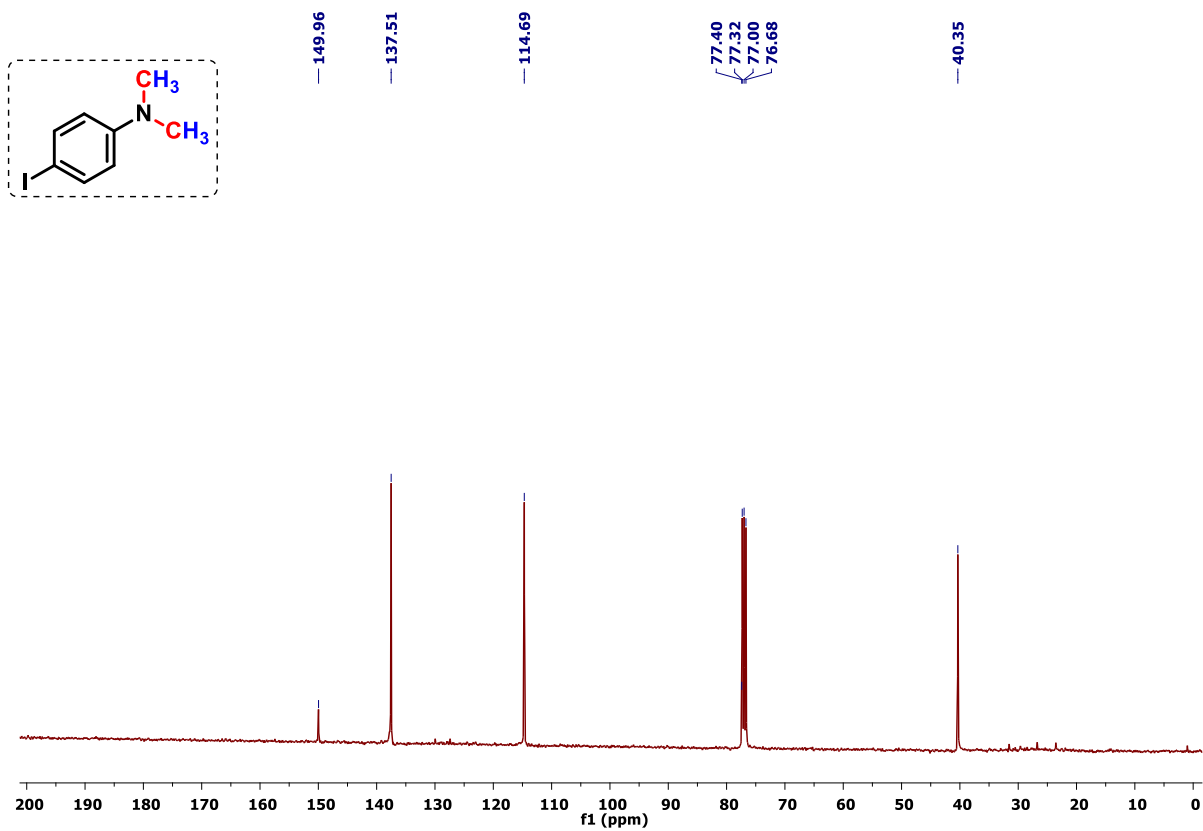

Figure S58.  $^{13}\text{C}\{^1\text{H}\}$  NMR spectrum of **5a** in  $\text{CDCl}_3$ .

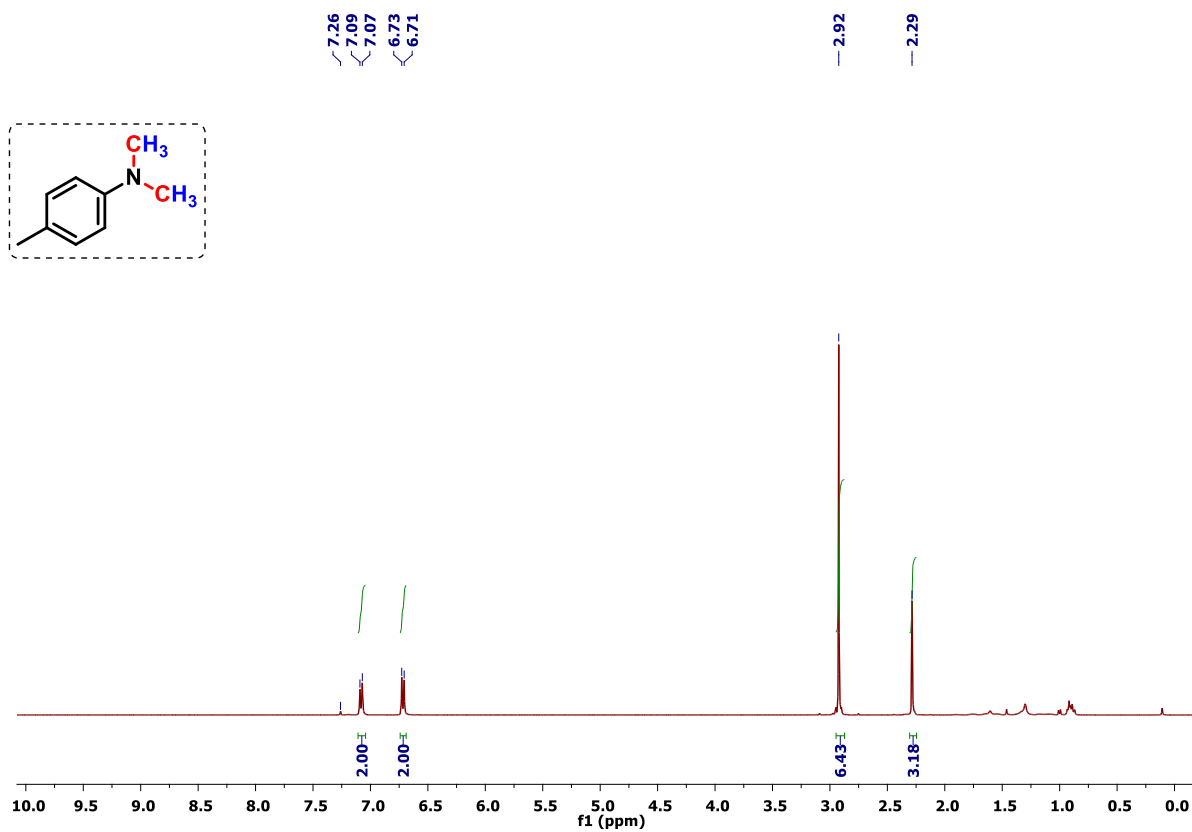

Figure S59.  $^1\text{H}$  NMR spectrum of **5b** in  $\text{CDCl}_3$ .

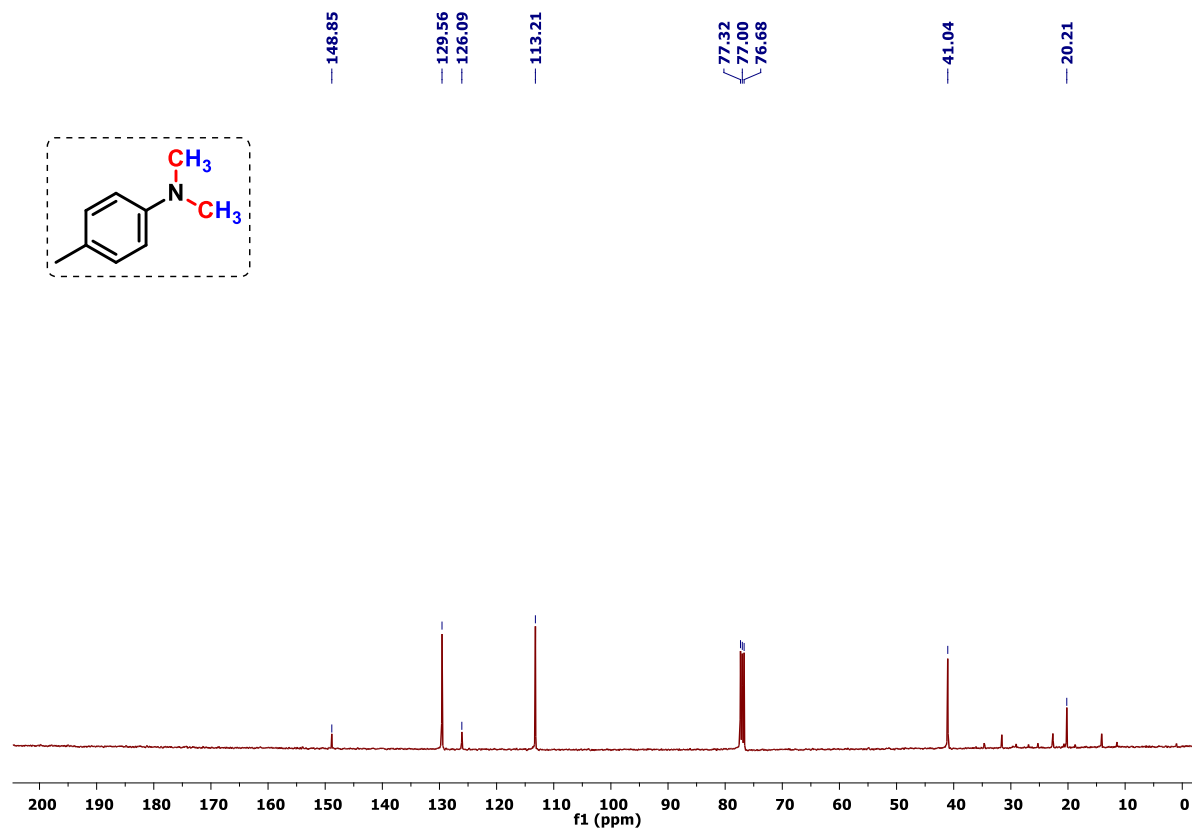

Figure S60.  $^{13}\text{C}\{^1\text{H}\}$  NMR spectrum of **5b** in  $\text{CDCl}_3$ .

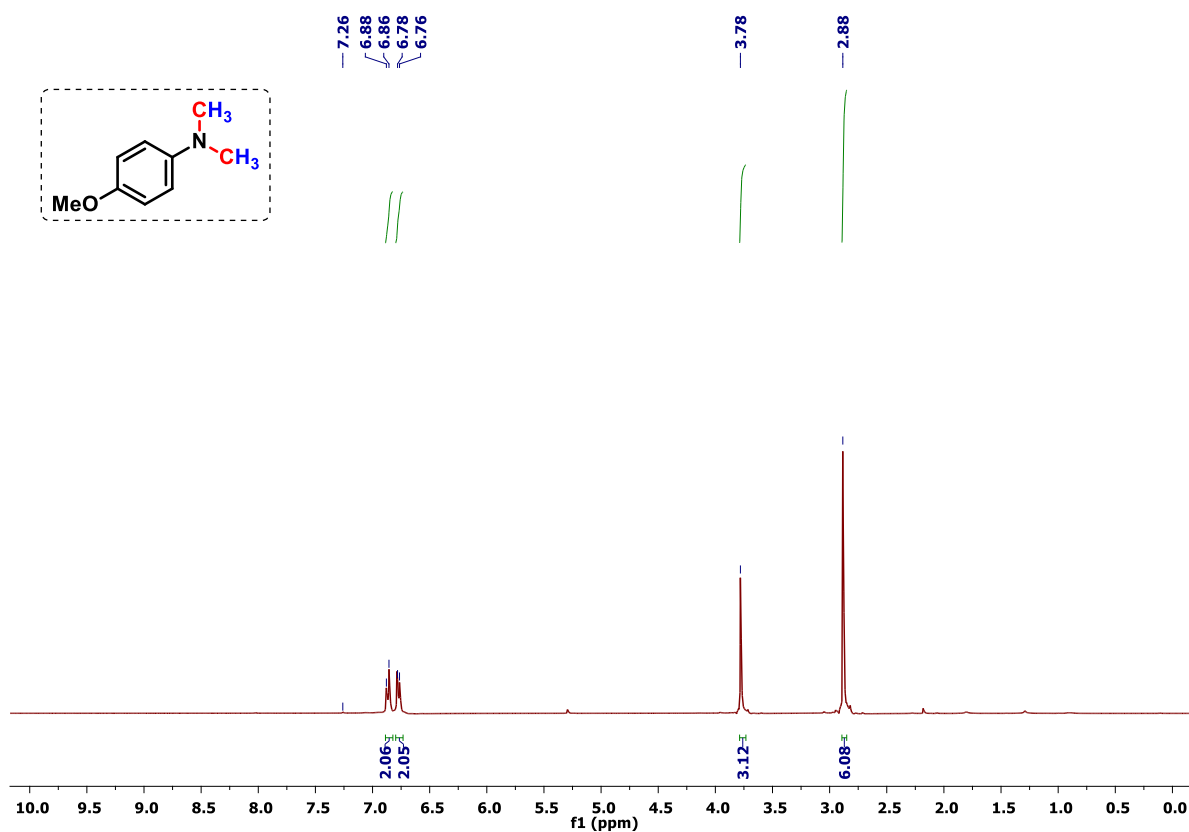

**Figure S61.**  $^1\text{H}$  NMR spectrum of **5c** in  $\text{CDCl}_3$ .

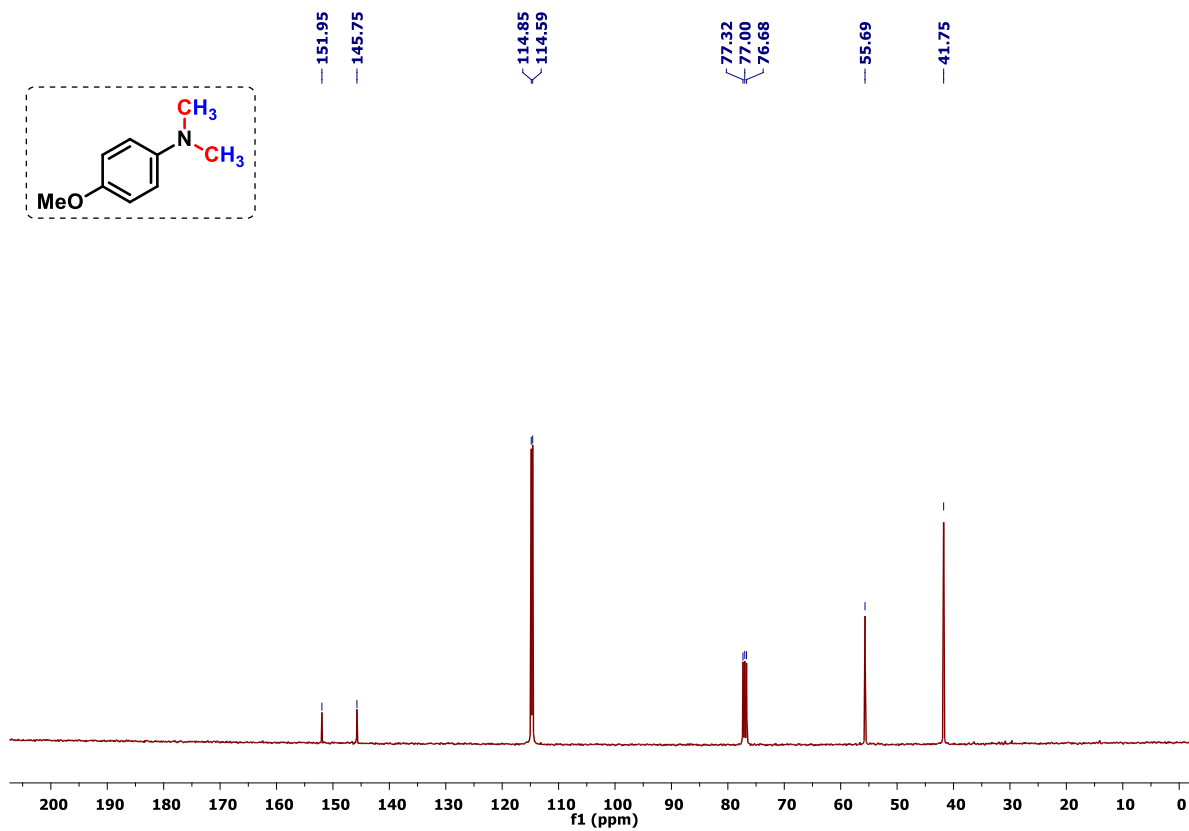

**Figure S62.**  $^{13}\text{C}\{^1\text{H}\}$  NMR spectrum of **5c** in  $\text{CDCl}_3$ .



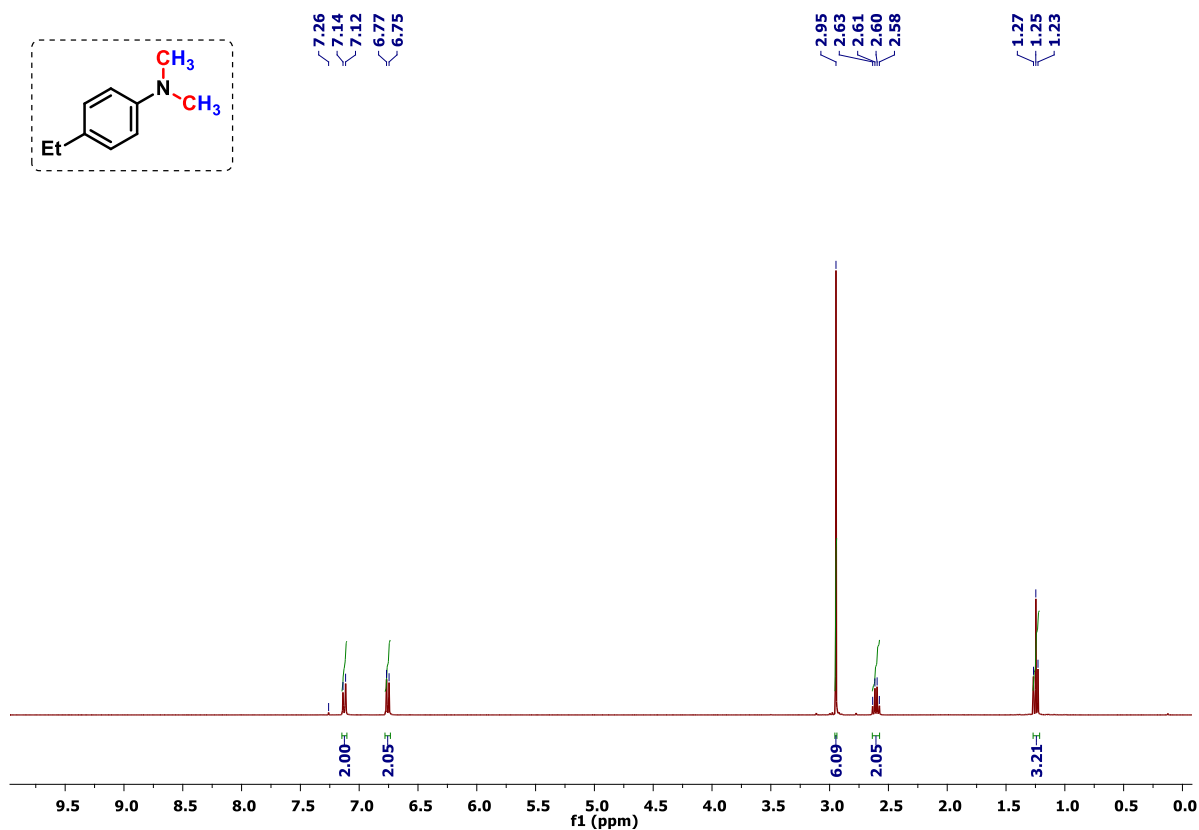

Figure S63.  $^1\text{H}$  NMR spectrum of **5d** in  $\text{CDCl}_3$ .

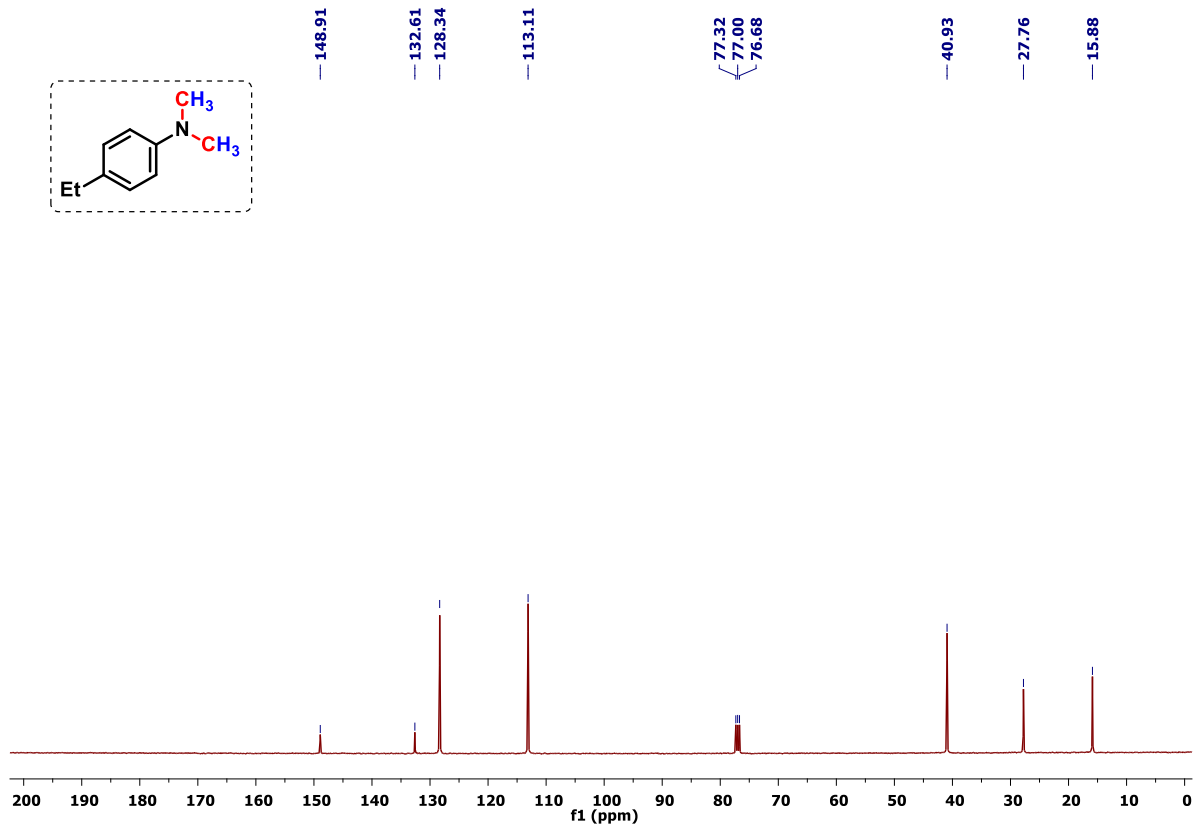

Figure S64.  $^{13}\text{C}\{^1\text{H}\}$  NMR spectrum of **5d** in  $\text{CDCl}_3$ .

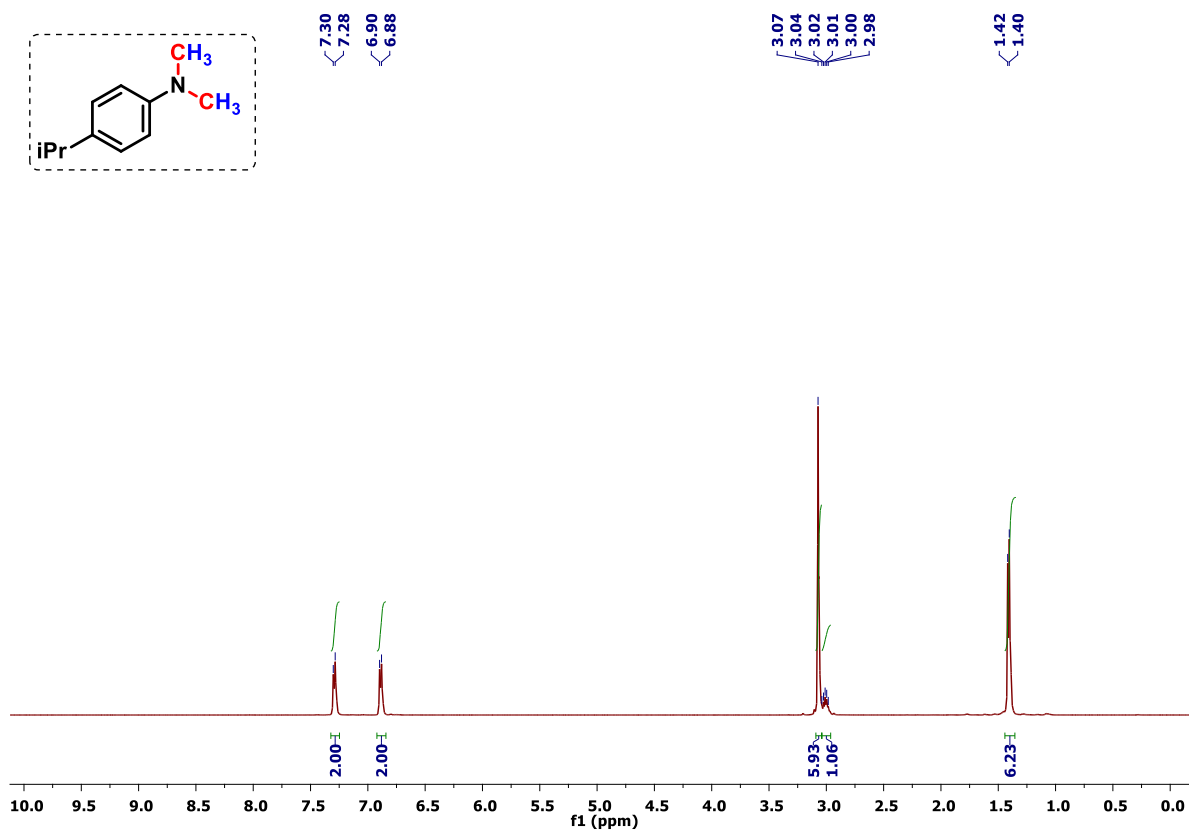

Figure S65.  $^1\text{H}$  NMR spectrum of **5e** in  $\text{CDCl}_3$ .

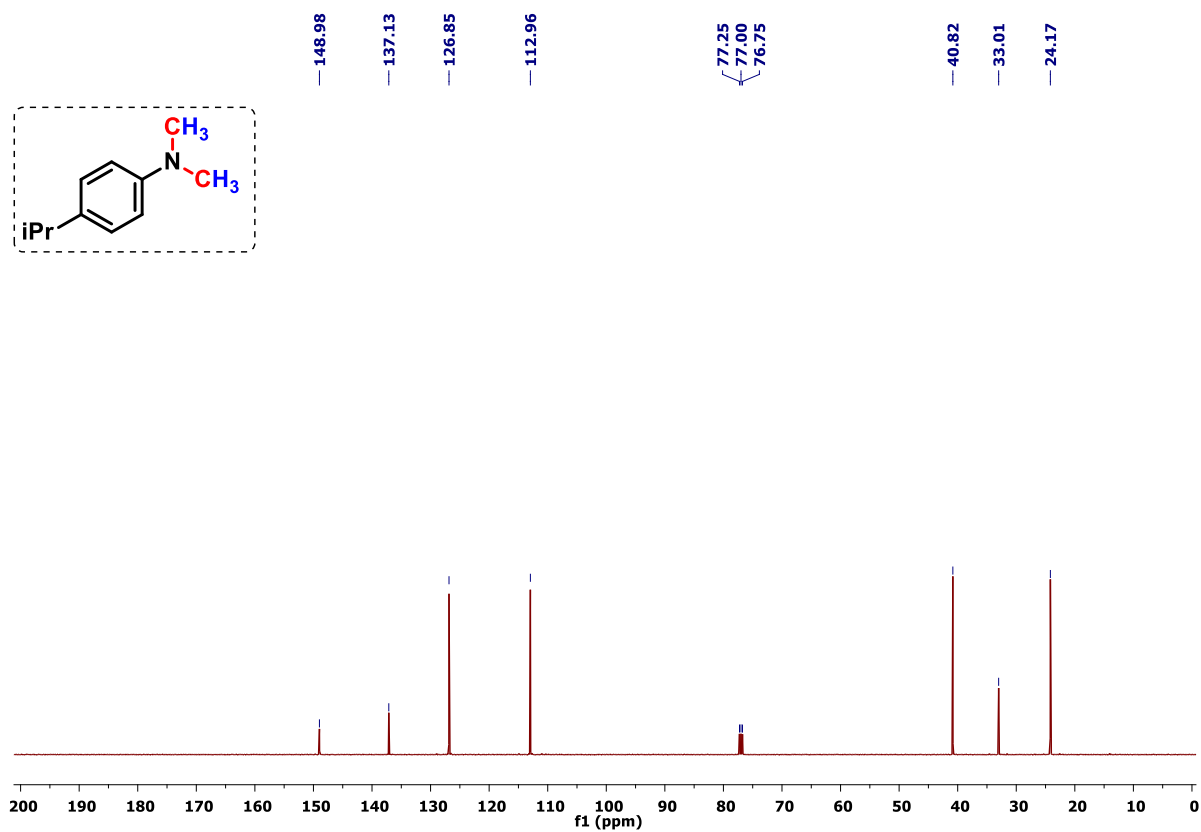

Figure S66.  $^{13}\text{C}\{^1\text{H}\}$  NMR spectrum of **5e** in  $\text{CDCl}_3$ .

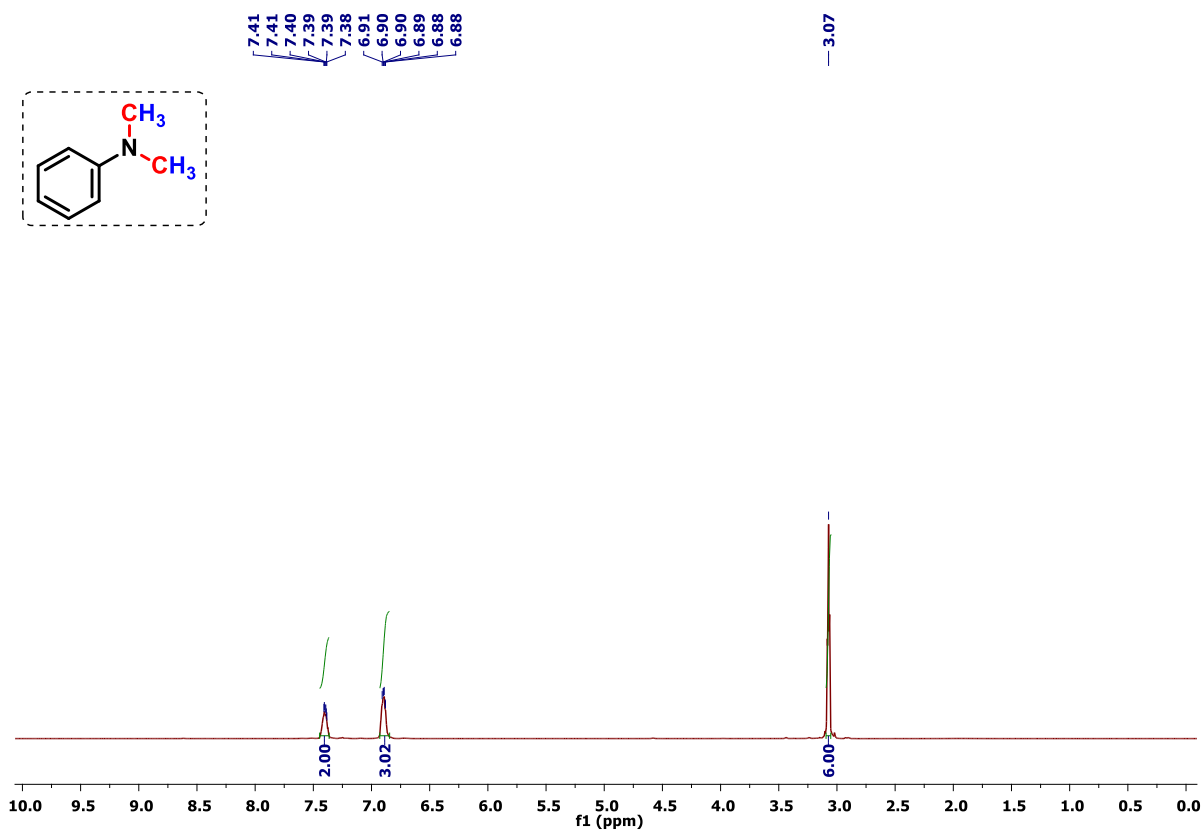

Figure S67.  $^1\text{H}$  NMR spectrum of **5f** in  $\text{CDCl}_3$ .

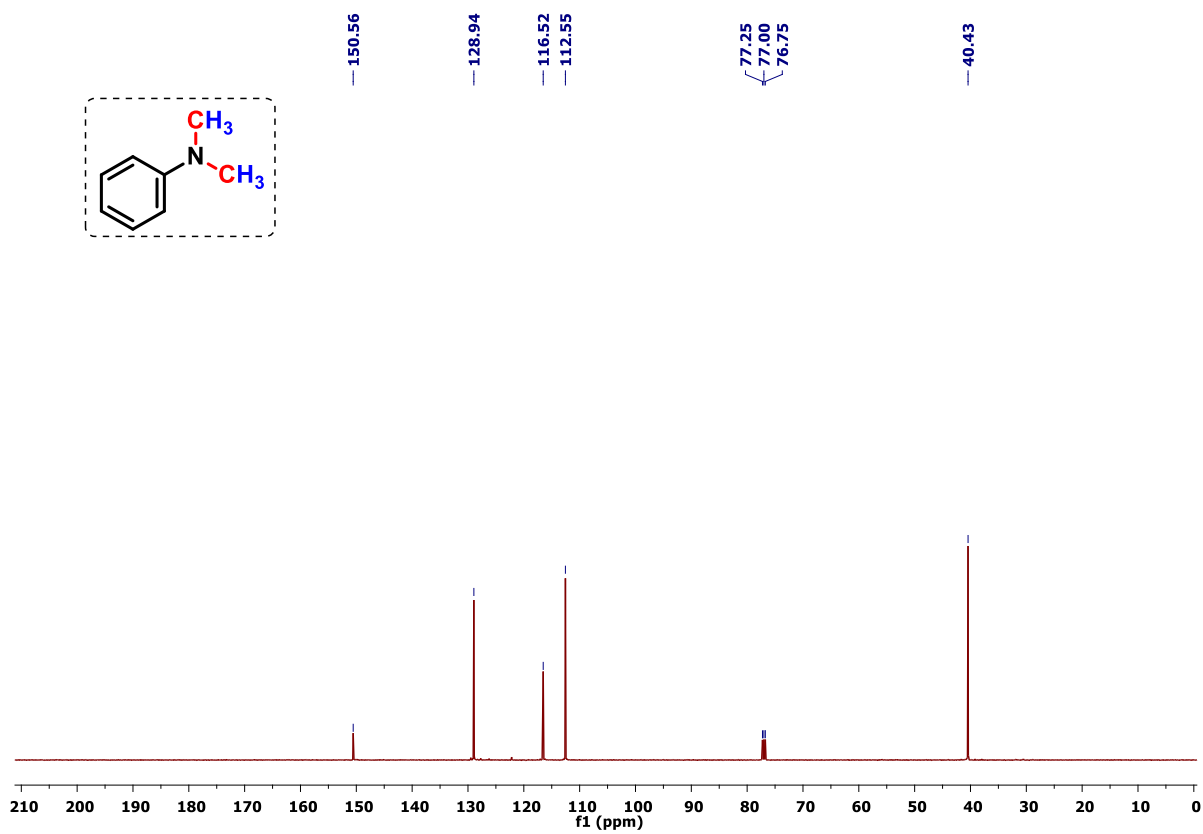

Figure S68.  $^{13}\text{C}\{^1\text{H}\}$  NMR spectrum of **5f** in  $\text{CDCl}_3$ .

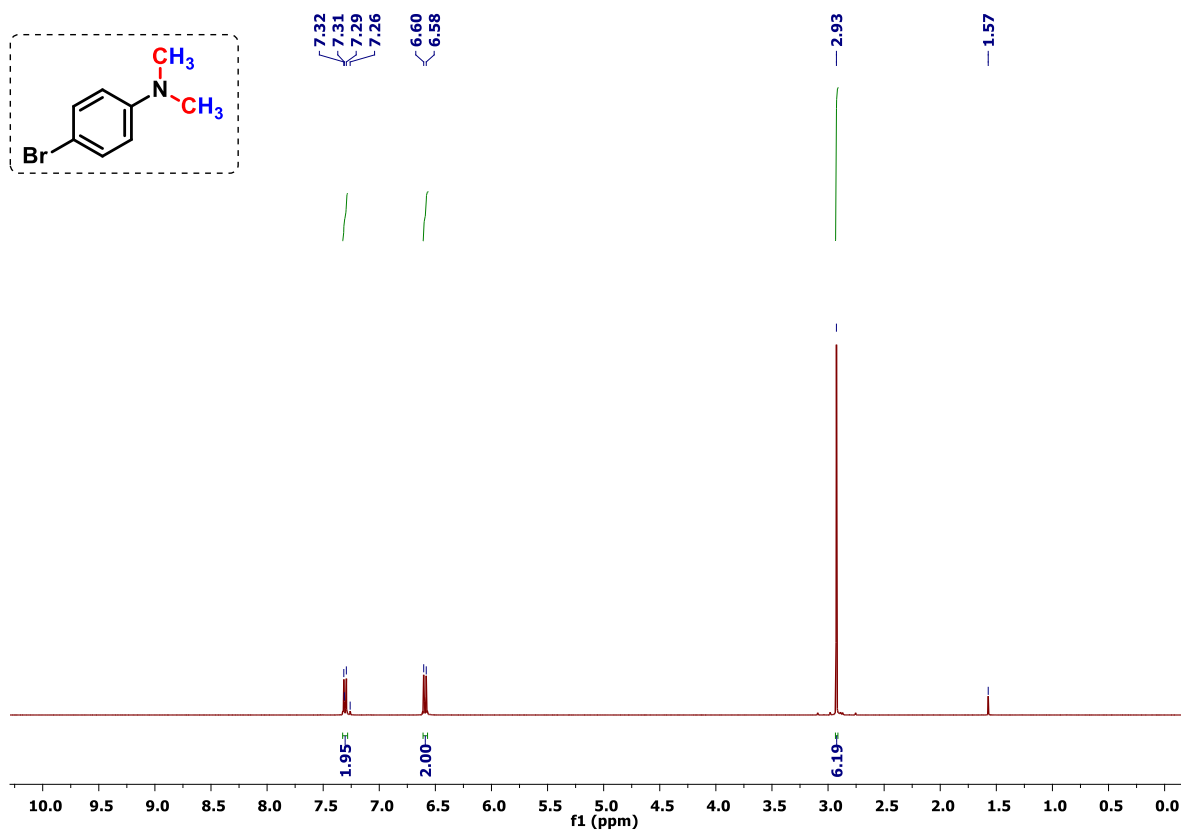

Figure S69.  $^1\text{H}$  NMR spectrum of **5g** in  $\text{CDCl}_3$ .

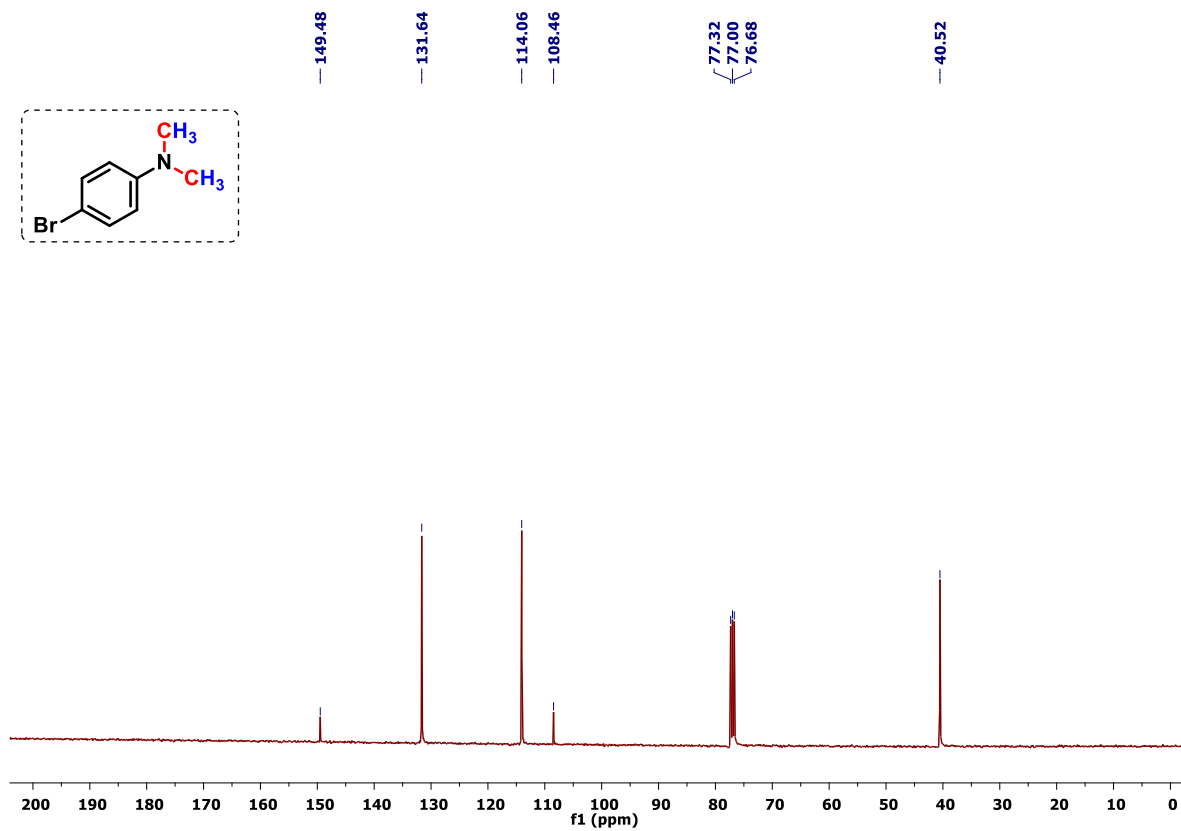

Figure S70.  $^{13}\text{C}\{^1\text{H}\}$  NMR spectrum of **5g** in  $\text{CDCl}_3$ .

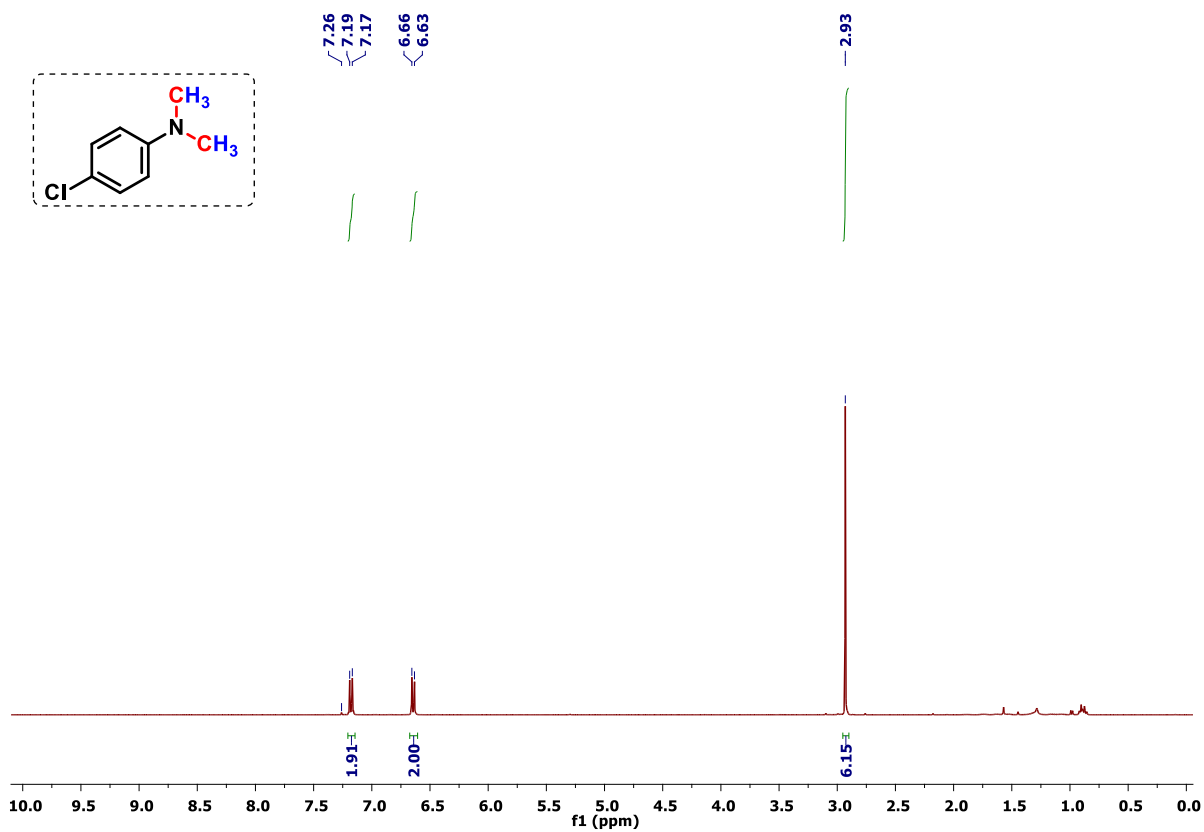

Figure S71.  $^1\text{H}$  NMR spectrum of **5h** in  $\text{CDCl}_3$ .

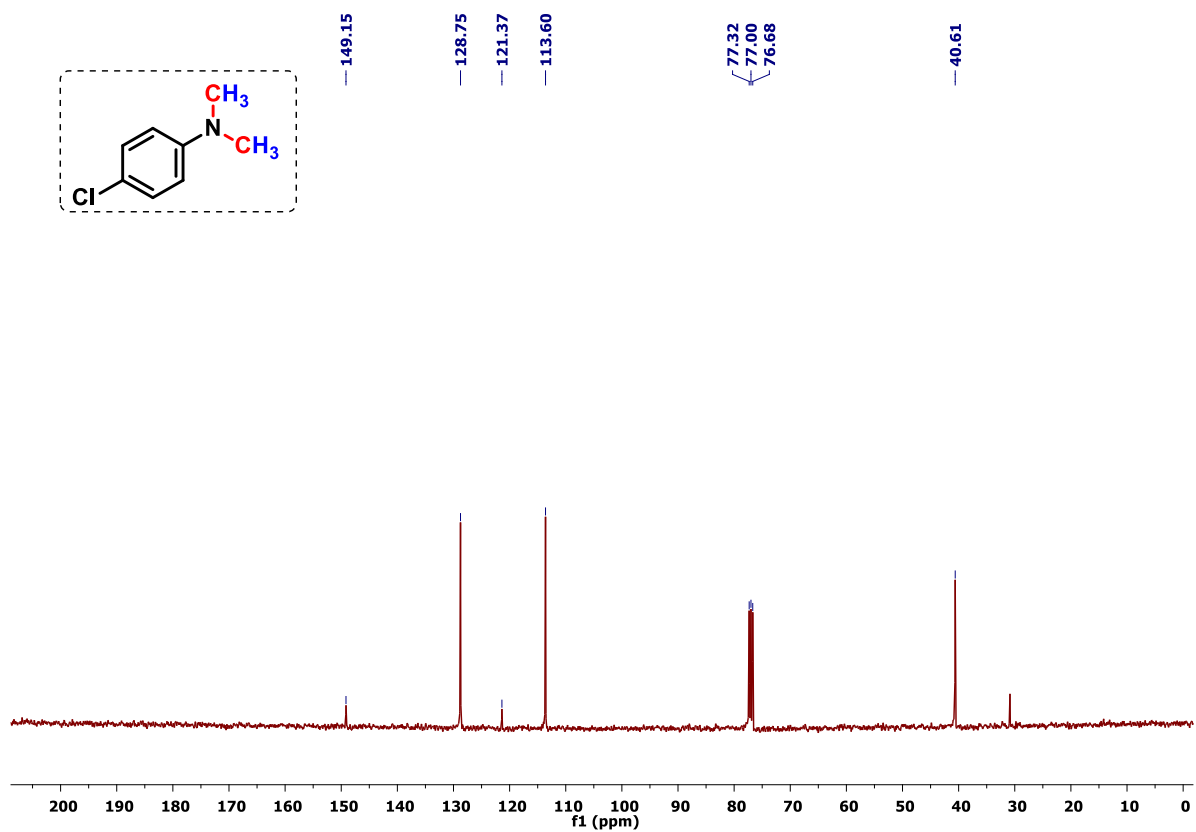

Figure S72.  $^{13}\text{C}\{^1\text{H}\}$  NMR spectrum of **5h** in  $\text{CDCl}_3$ .

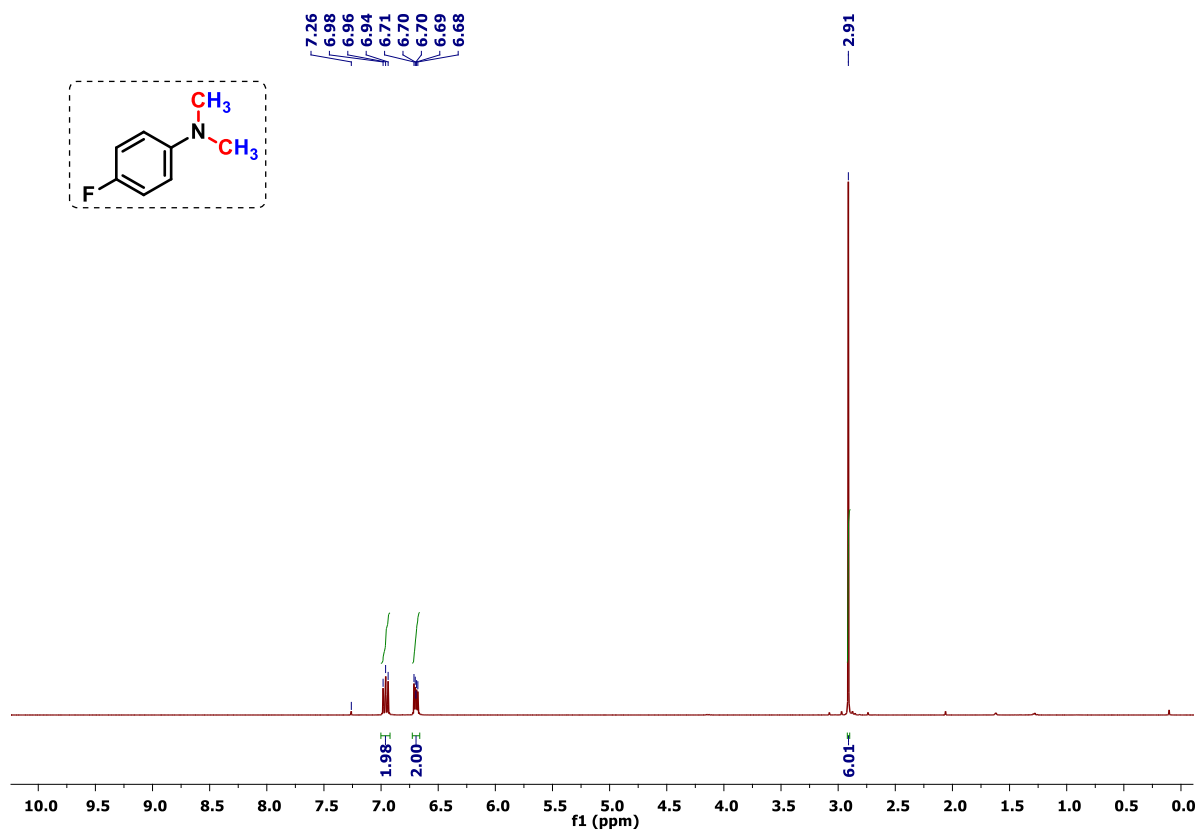

Figure S73.  $^1\text{H}$  NMR spectrum of **5i** in CDCl<sub>3</sub>.

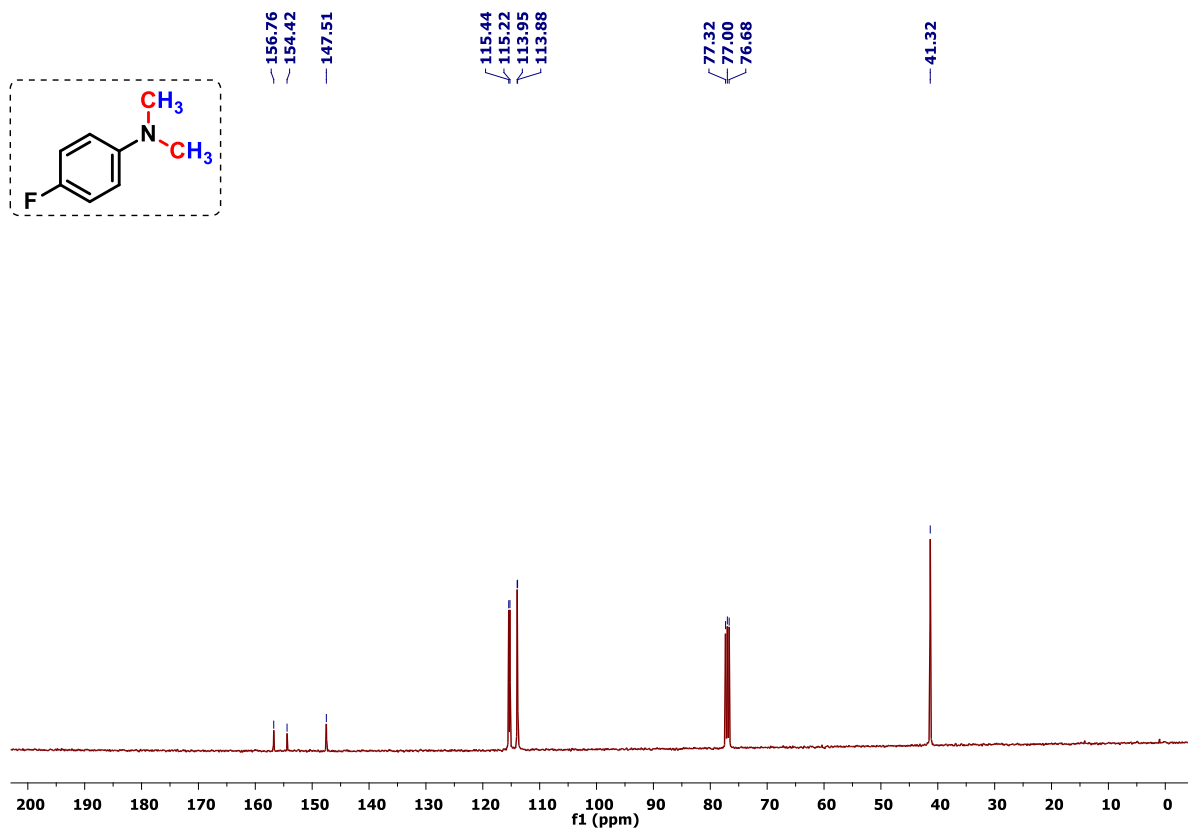

Figure S74.  $^{13}\text{C}\{^1\text{H}\}$  NMR spectrum of **5i** in CDCl<sub>3</sub>.

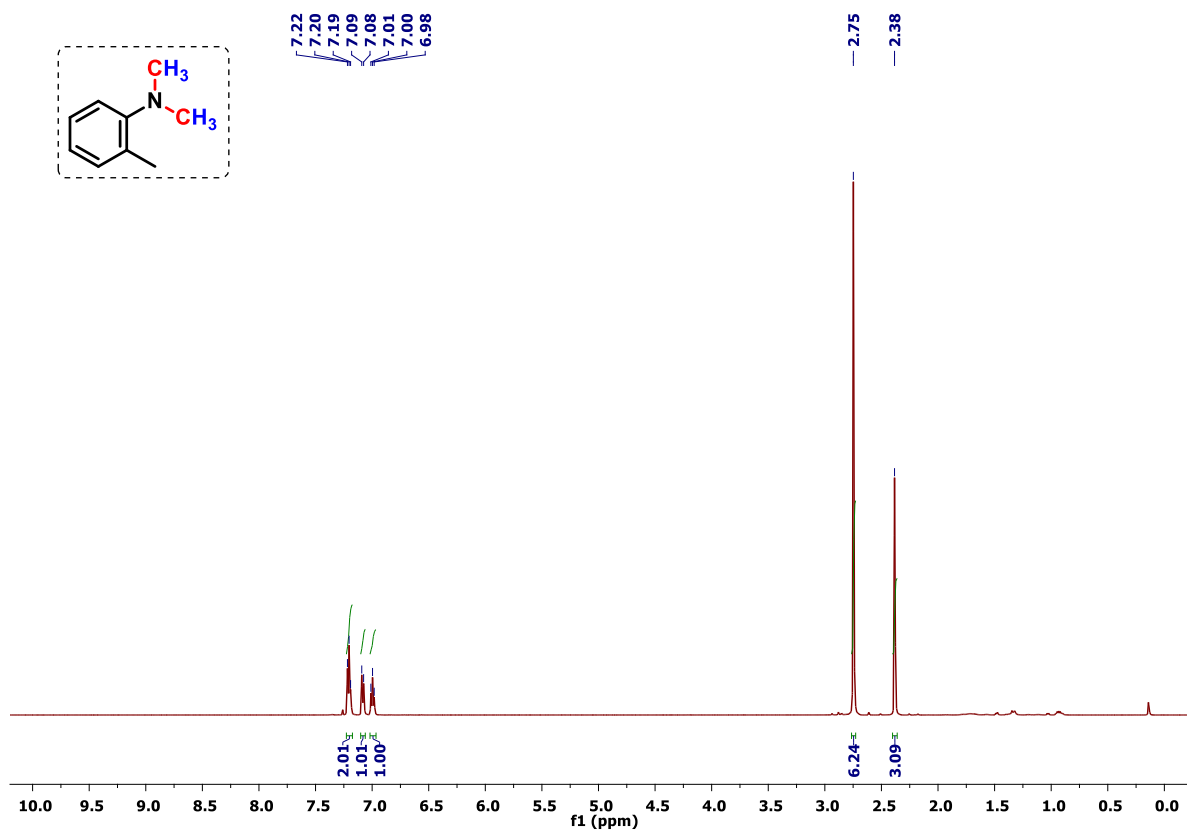

Figure S75. <sup>1</sup>H NMR spectrum of **5j** in CDCl<sub>3</sub>.

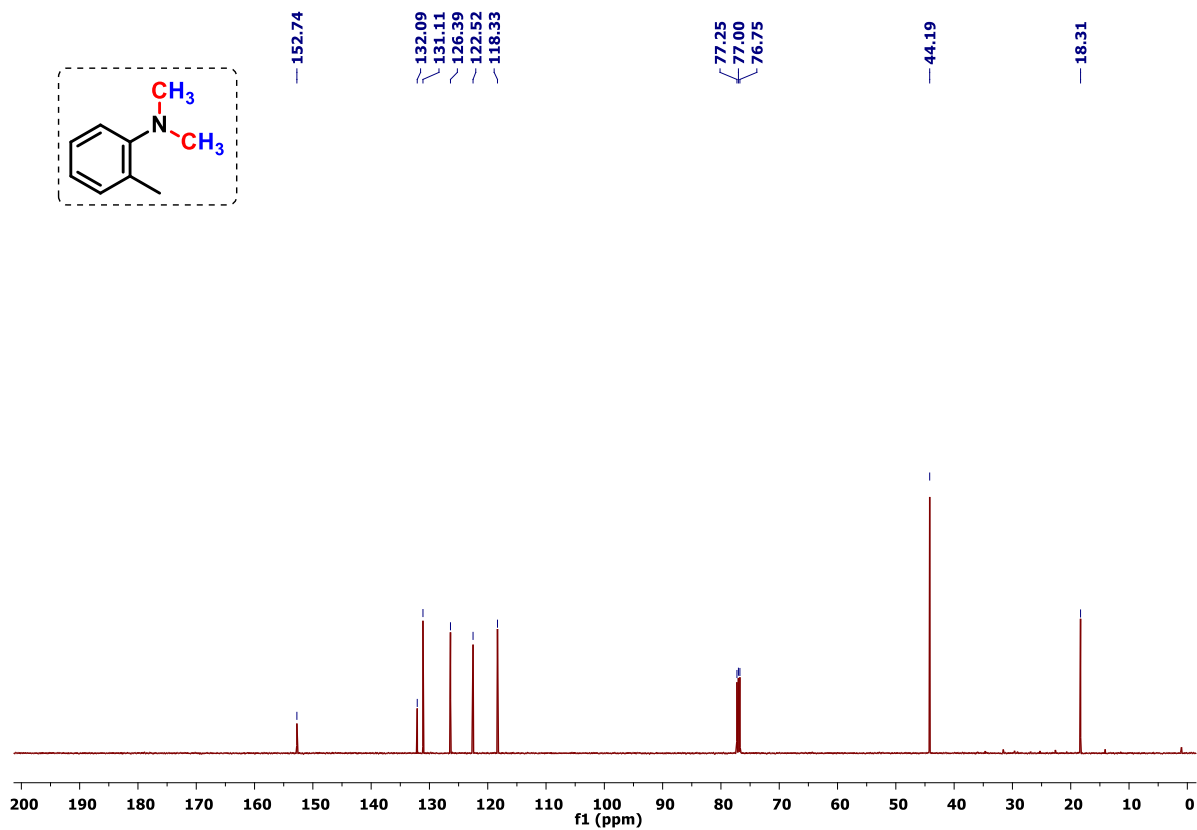

Figure S76. <sup>13</sup>C{<sup>1</sup>H} NMR spectrum of **5j** in CDCl<sub>3</sub>.

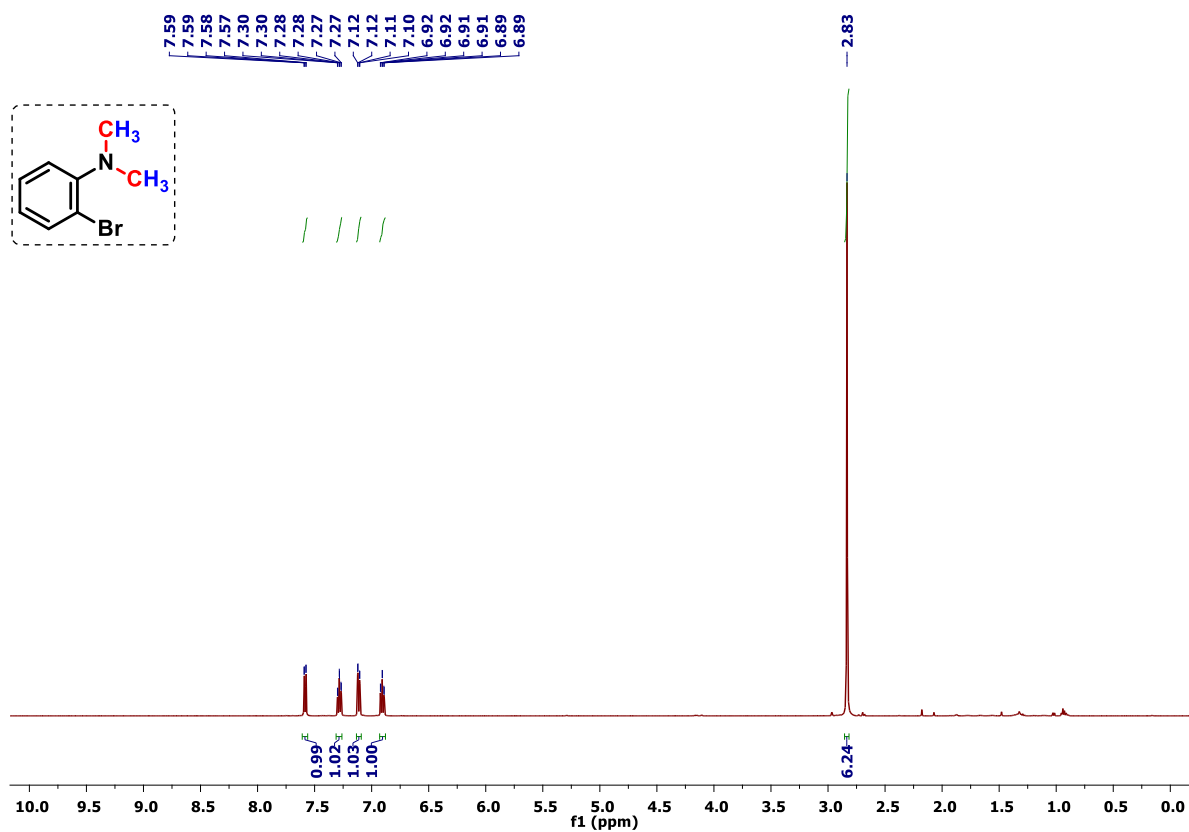

Figure S77. <sup>1</sup>H NMR spectrum of **5k** in CDCl<sub>3</sub>.

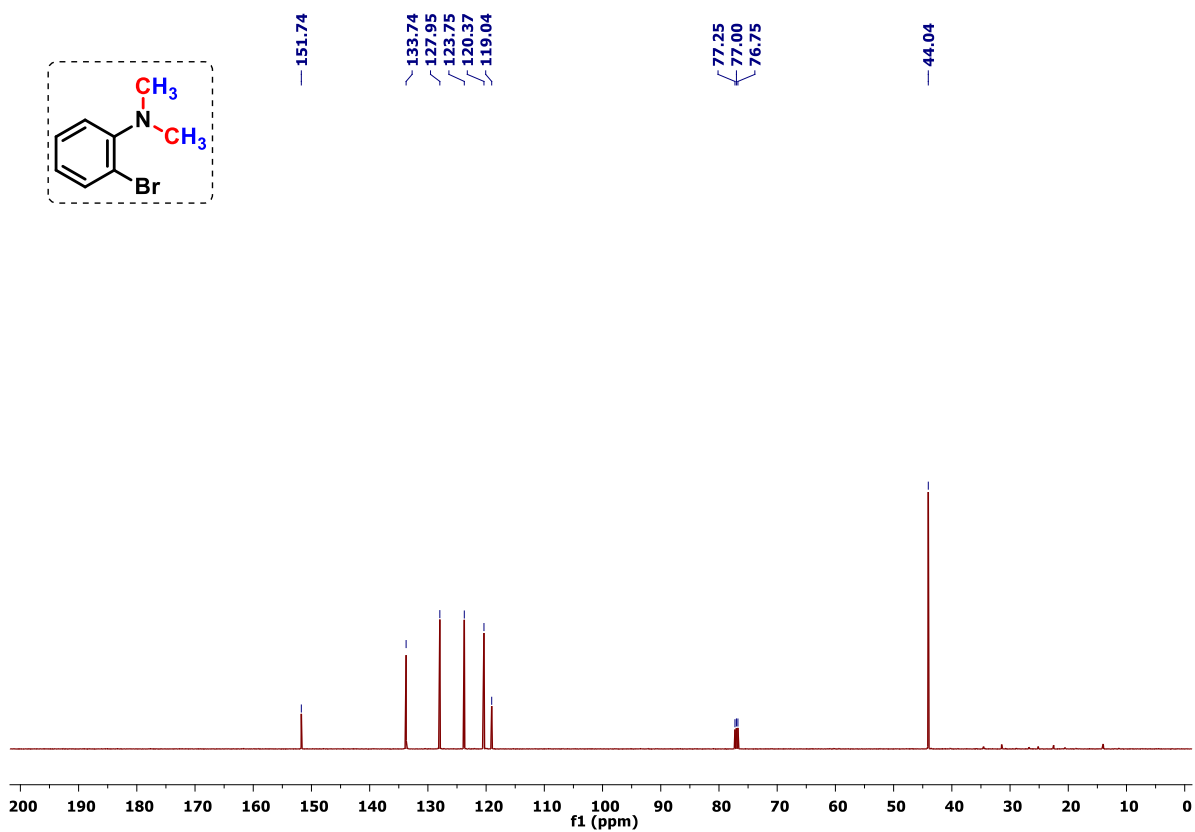

Figure S78. <sup>13</sup>C{<sup>1</sup>H} NMR spectrum of **5k** in CDCl<sub>3</sub>.



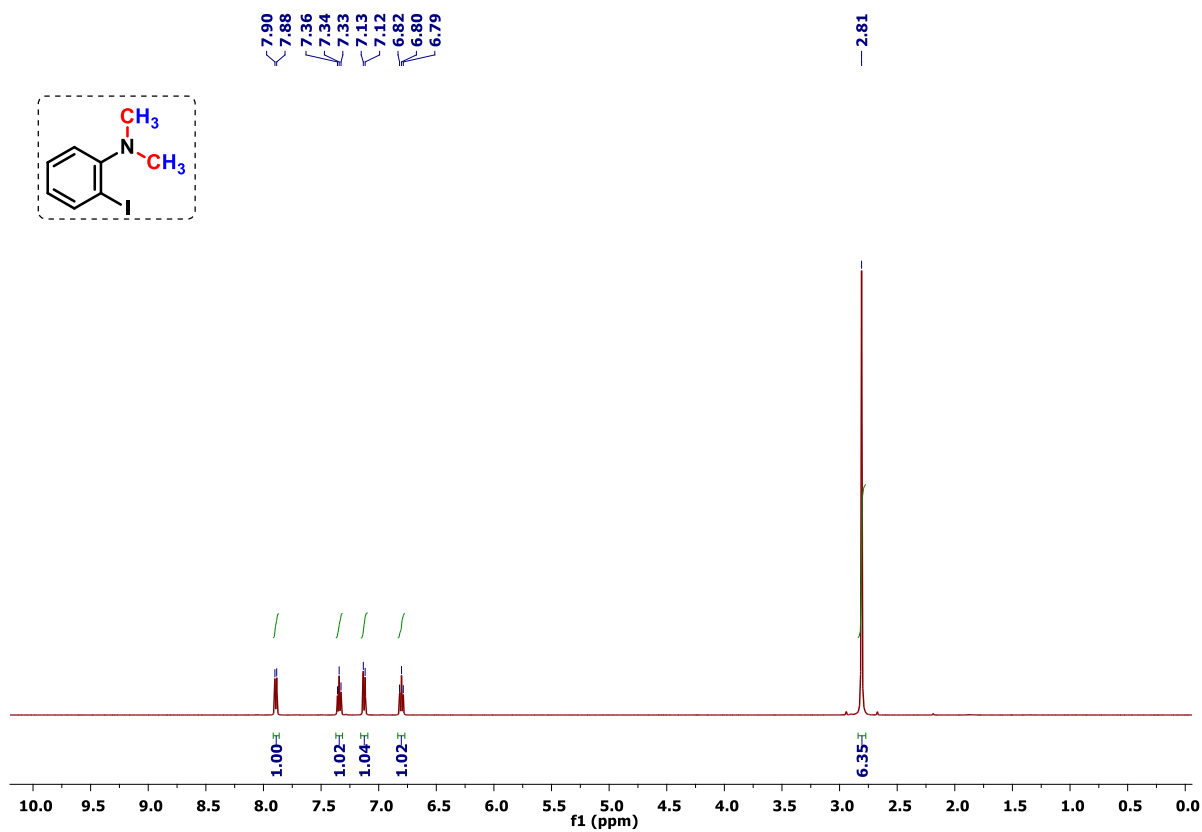

Figure S79.  $^1\text{H}$  NMR spectrum of **5I** in  $\text{CDCl}_3$ .

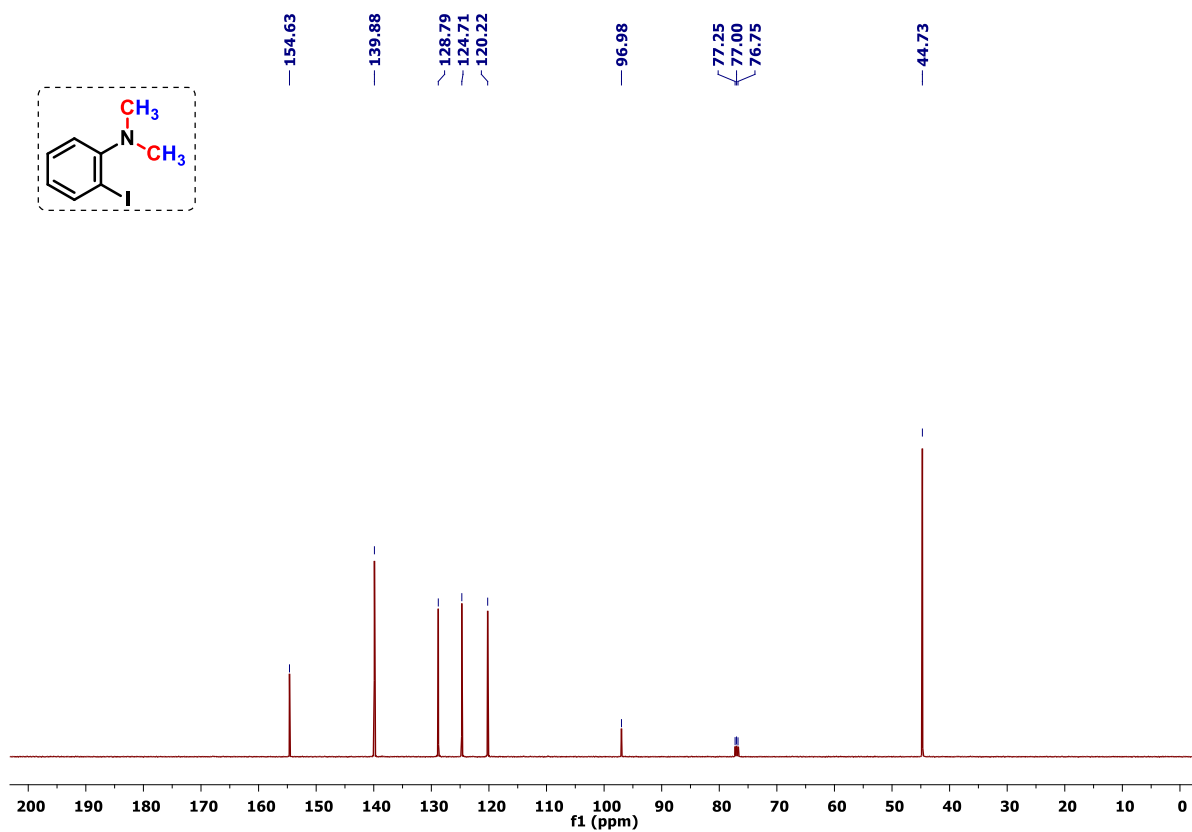

Figure S80.  $^{13}\text{C}\{^1\text{H}\}$  NMR spectrum of **5I** in  $\text{CDCl}_3$ .

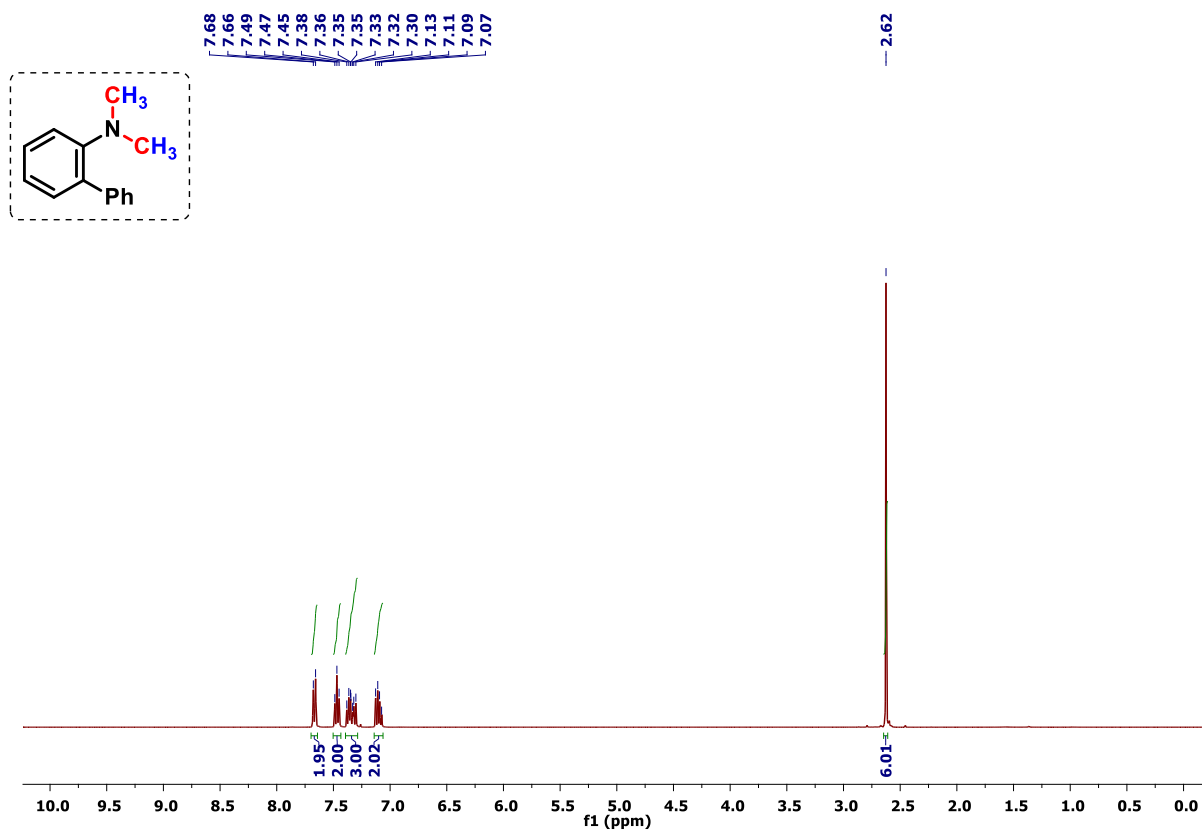

Figure S81.  $^1\text{H}$  NMR spectrum of **5m** in  $\text{CDCl}_3$ .

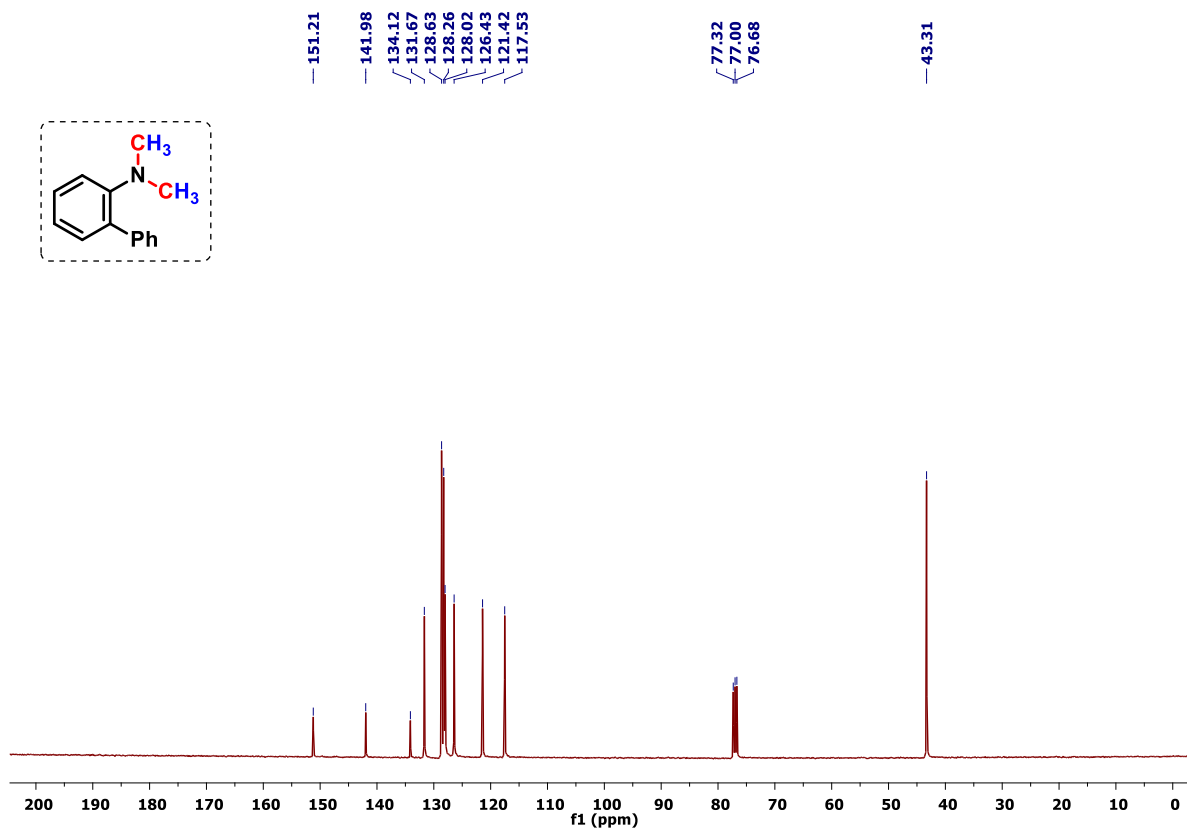

Figure S82.  $^{13}\text{C}\{^1\text{H}\}$  NMR spectrum of **5m** in  $\text{CDCl}_3$ .

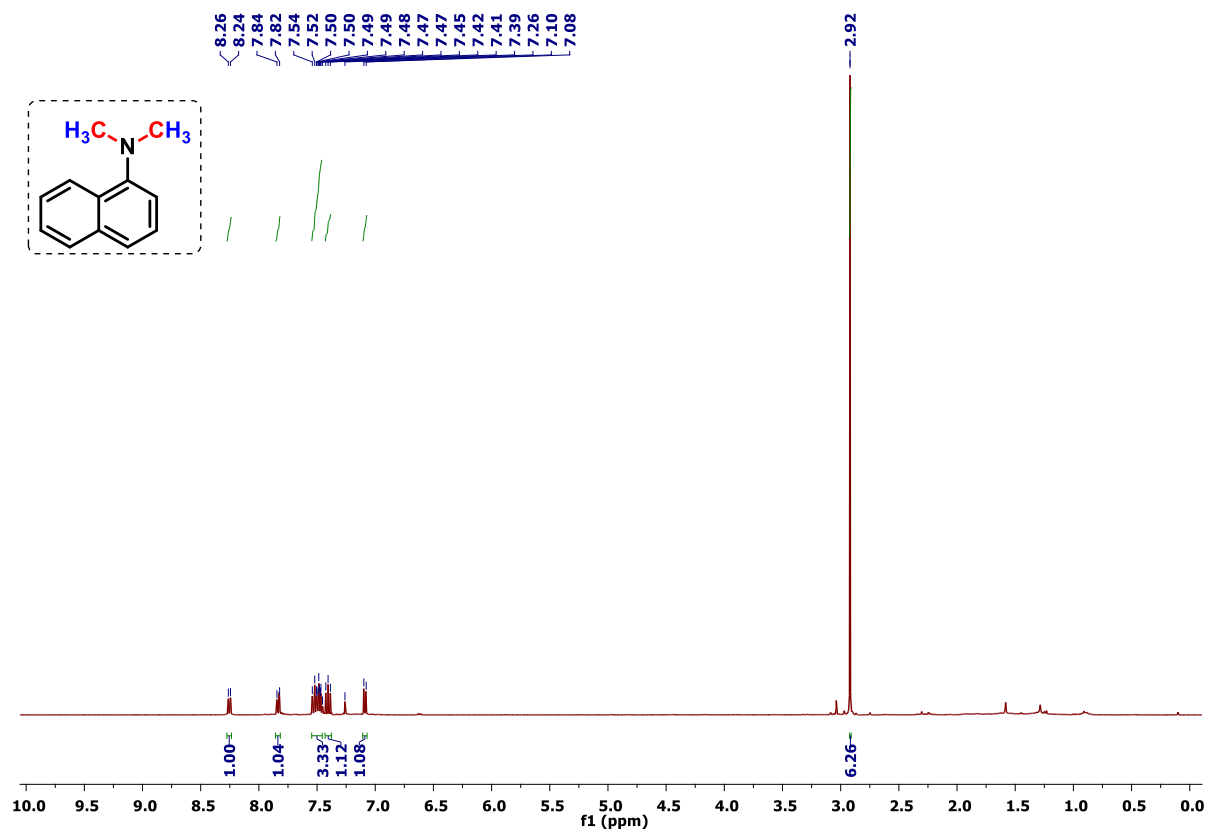

Figure S83. <sup>1</sup>H NMR spectrum of **5n** in CDCl<sub>3</sub>.

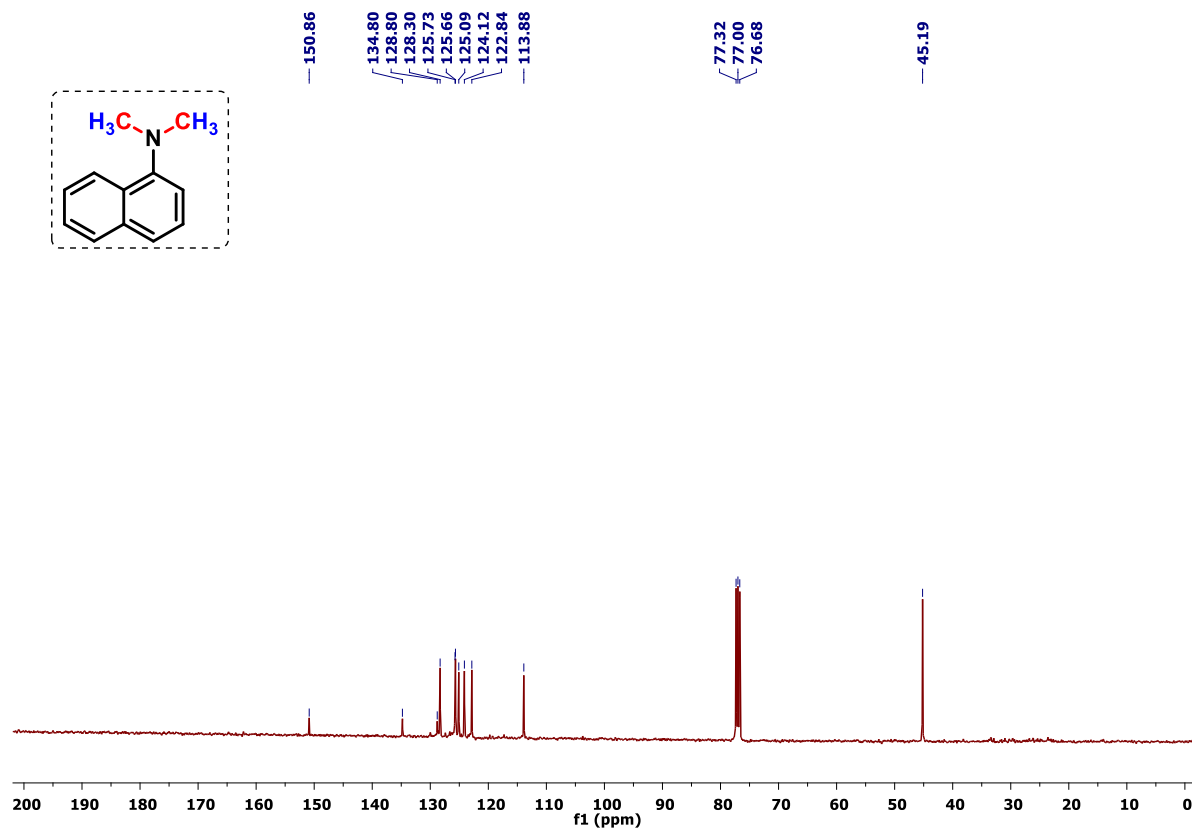

Figure S84. <sup>13</sup>C{<sup>1</sup>H} NMR spectrum of **5n** in CDCl<sub>3</sub>.

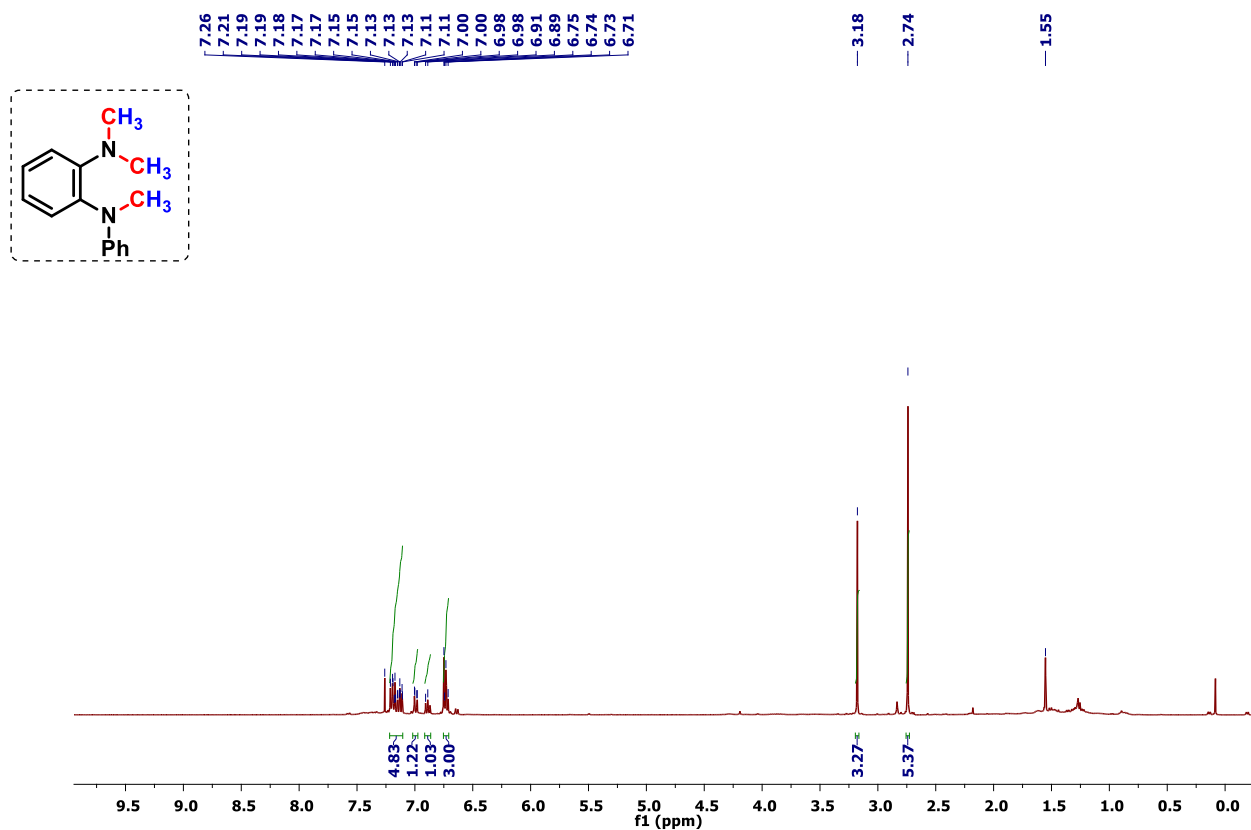

Figure S85. <sup>1</sup>H NMR spectrum of **5q** in CDCl<sub>3</sub>.

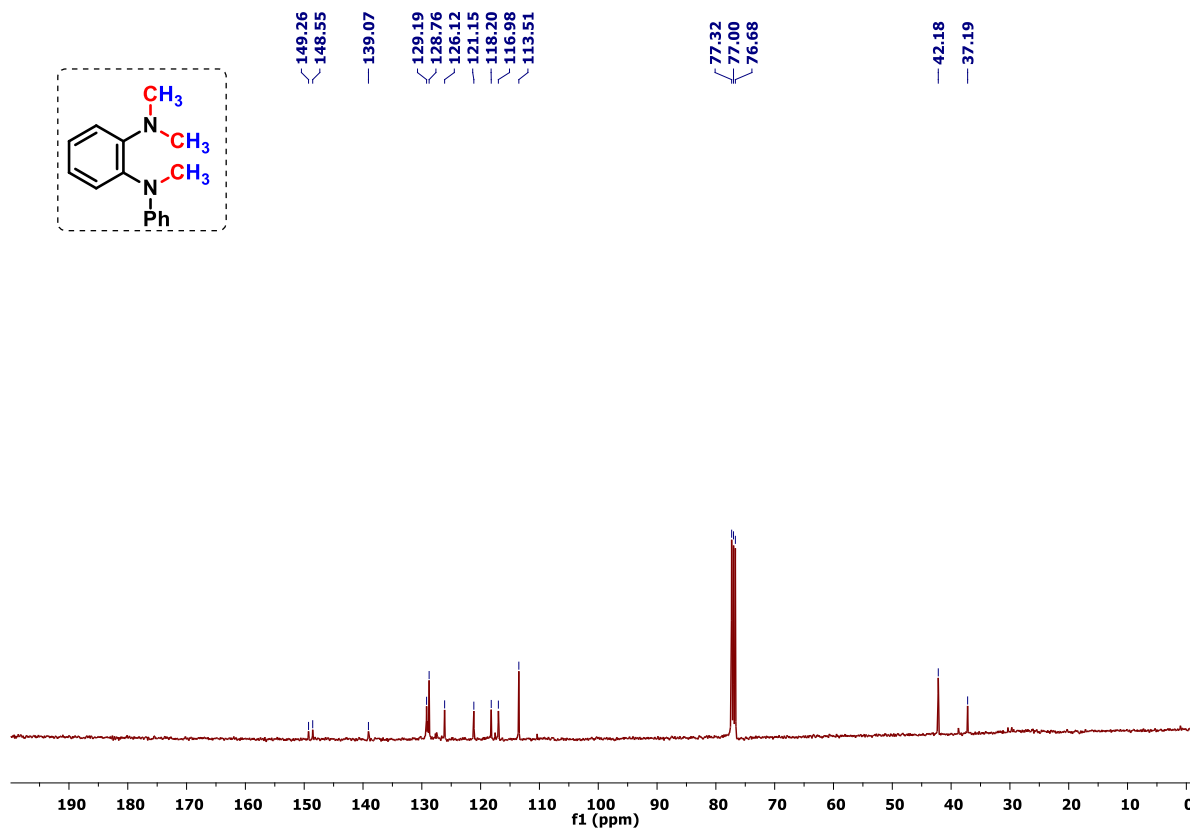

Figure S86. <sup>13</sup>C{<sup>1</sup>H} NMR spectrum of **5q** in CDCl<sub>3</sub>.

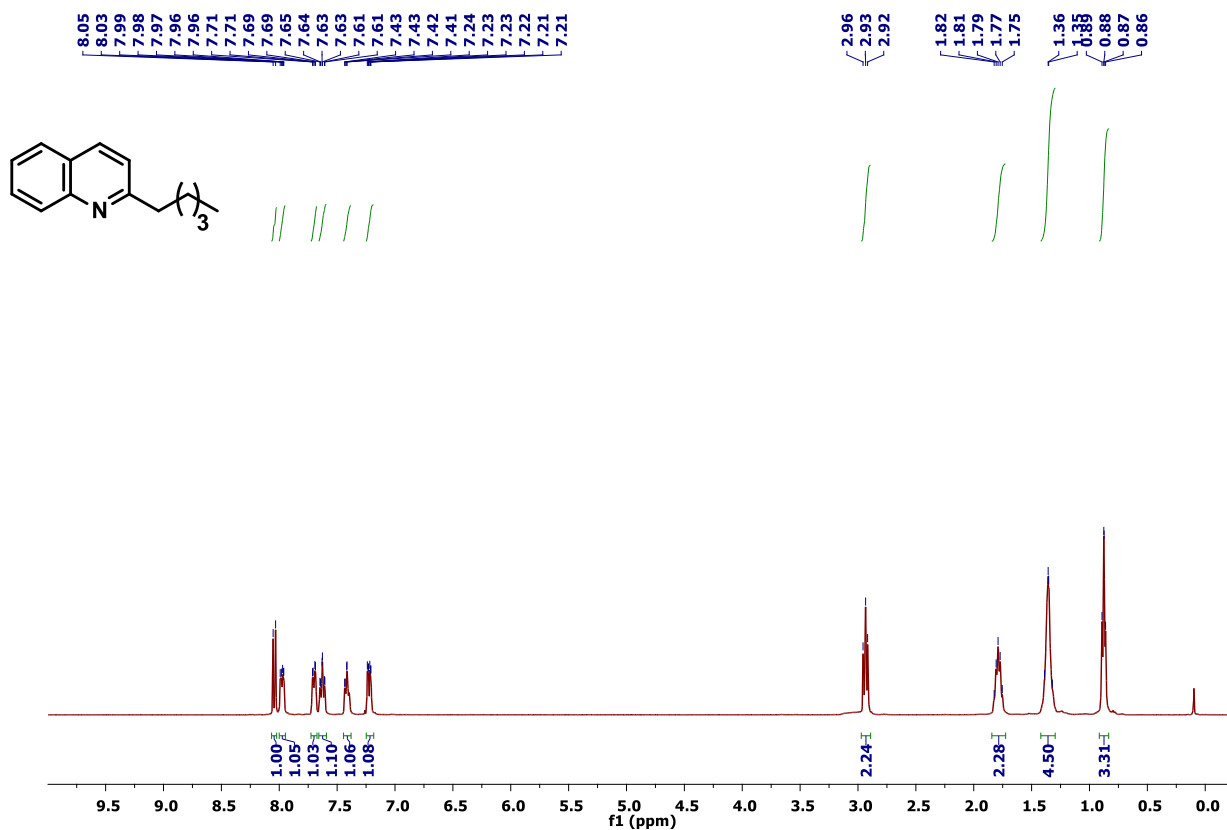

Figure S87. <sup>1</sup>H NMR spectrum of **6'** in CDCl<sub>3</sub>.

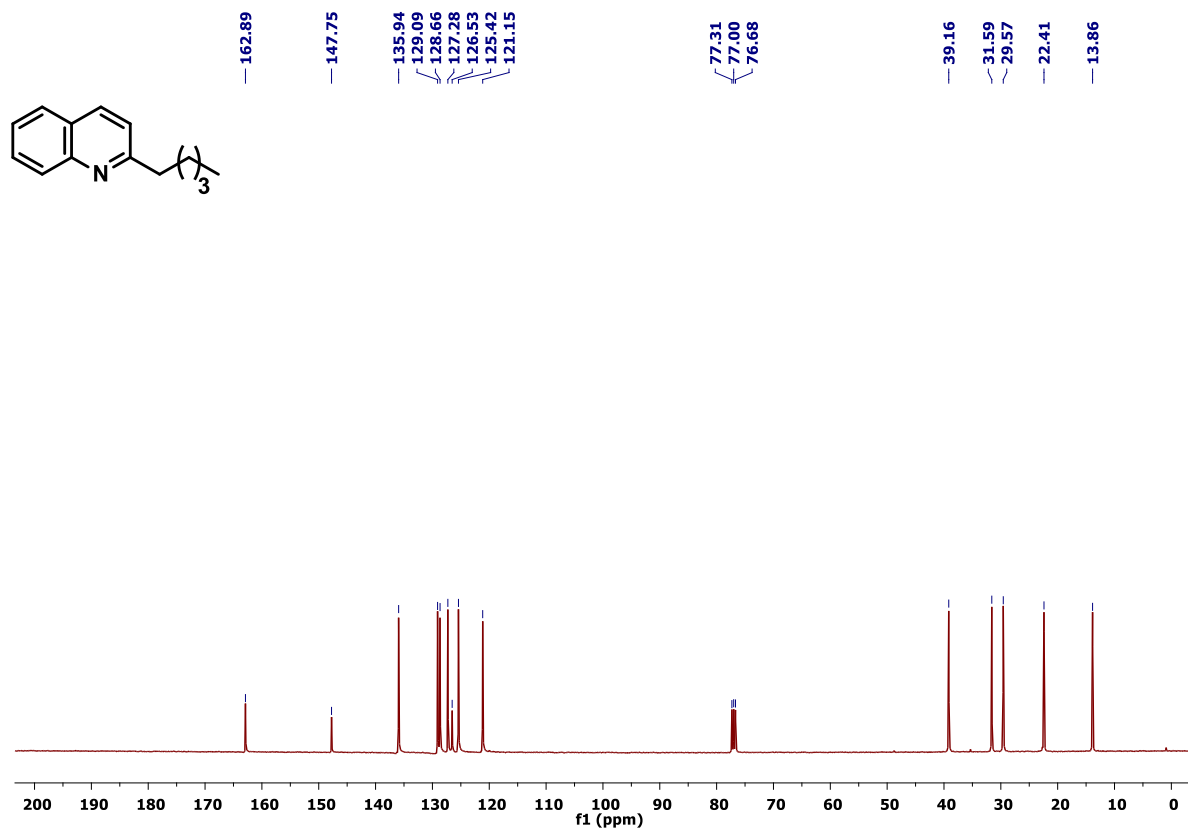

Figure S88. <sup>13</sup>C{<sup>1</sup>H} NMR spectrum of **6'** in CDCl<sub>3</sub>.

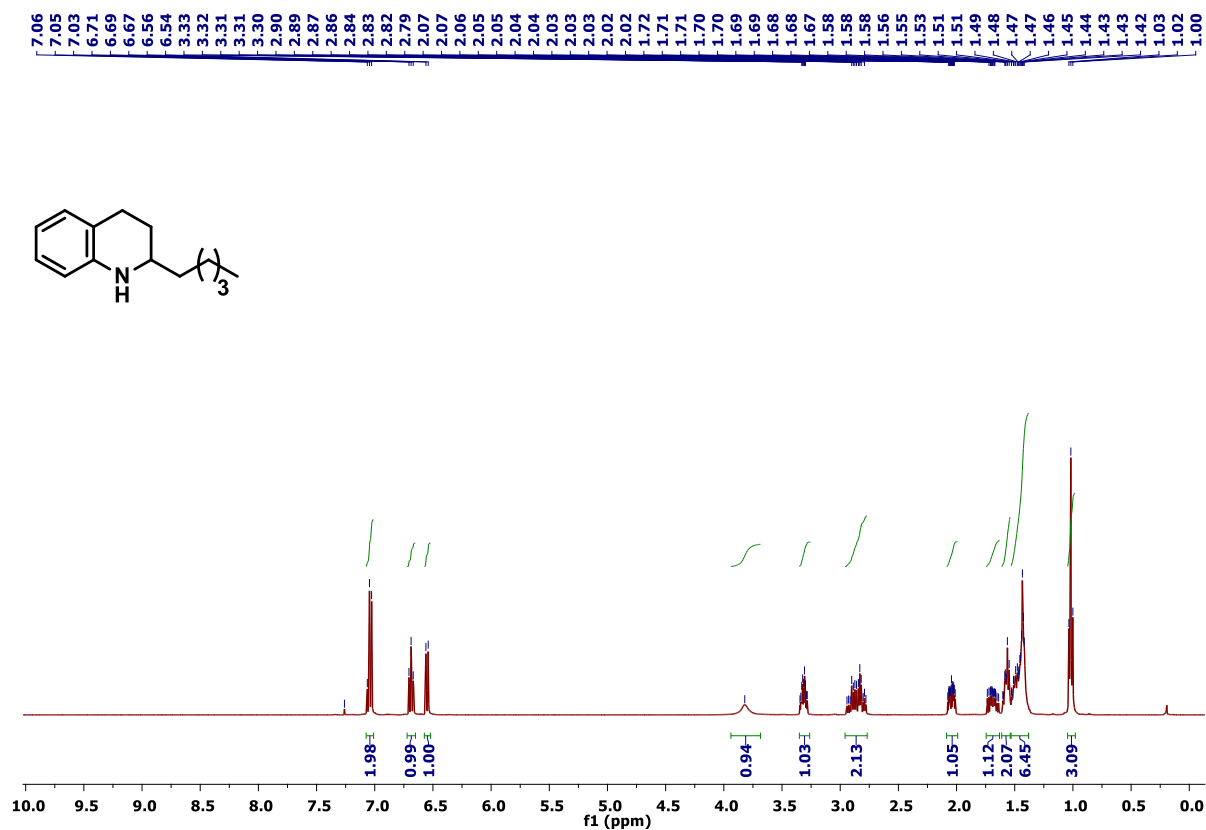

Figure S89.  $^1\text{H}$  NMR spectrum of **6** in  $\text{CDCl}_3$ .

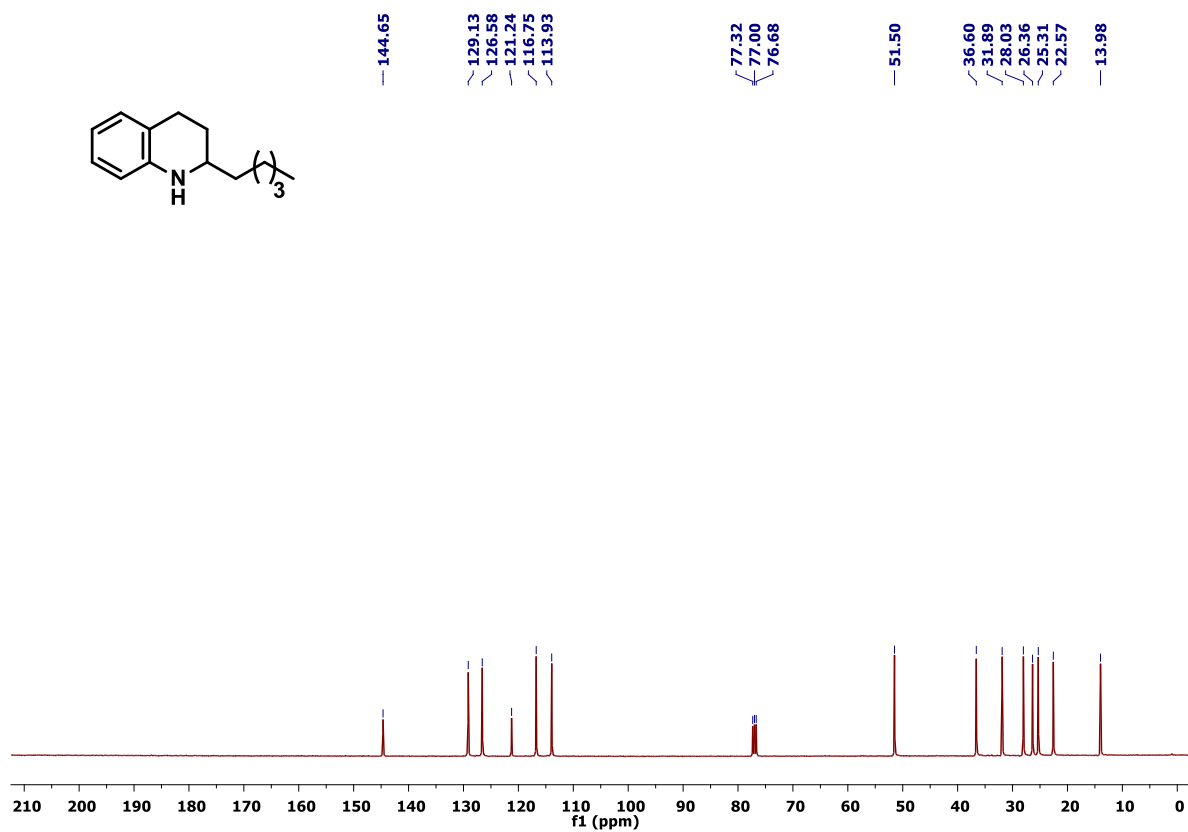

Figure S90.  $^{13}\text{C}\{^1\text{H}\}$  NMR spectrum of **6** in  $\text{CDCl}_3$ .

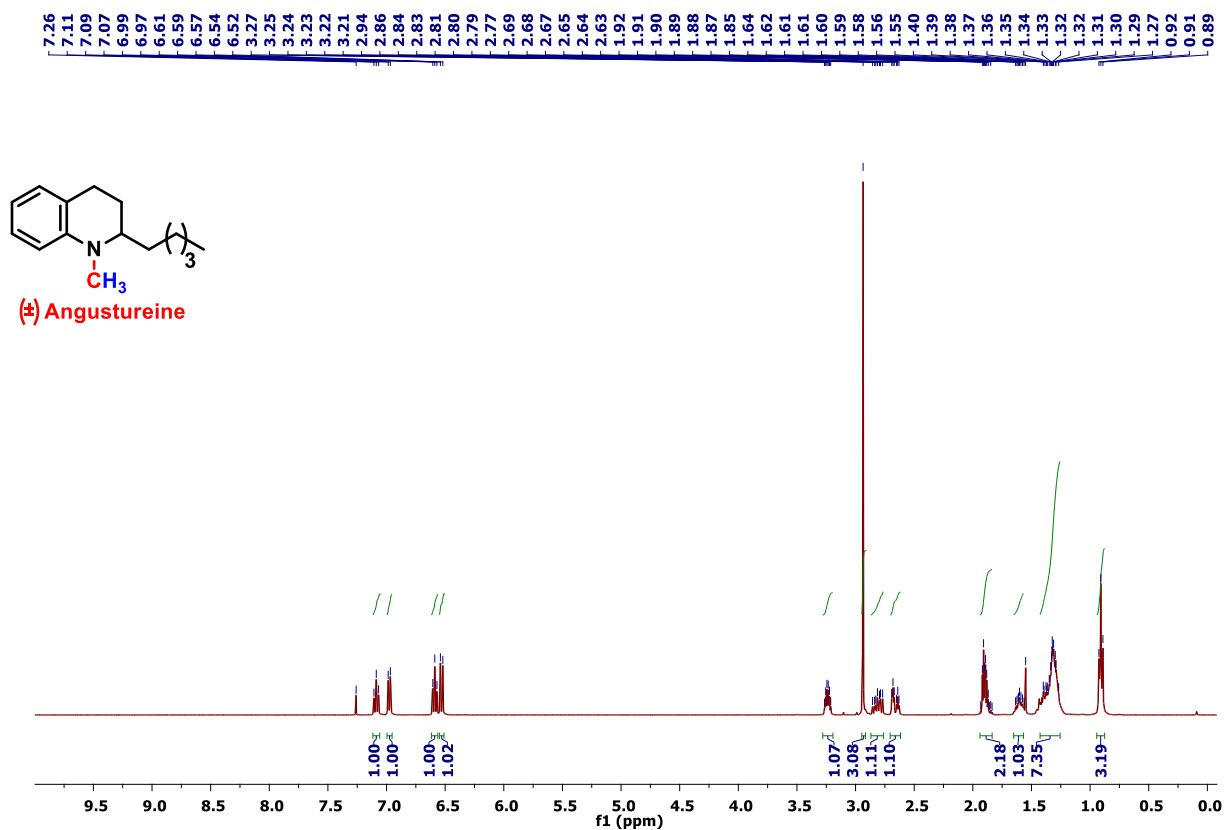

Figure S91.  $^1\text{H}$  NMR spectrum of **7** in  $\text{CDCl}_3$ .

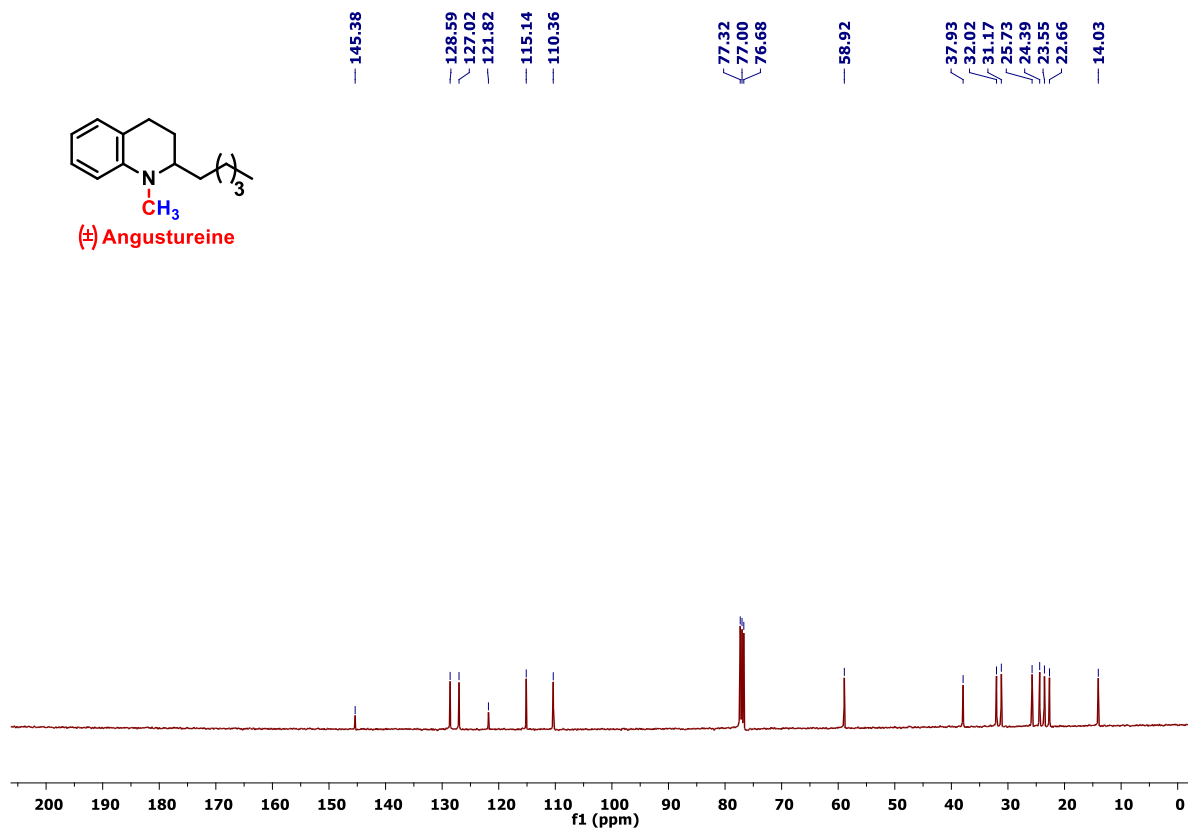

Figure S92.  $^{13}\text{C}\{^1\text{H}\}$  NMR spectrum of **7** in  $\text{CDCl}_3$ .

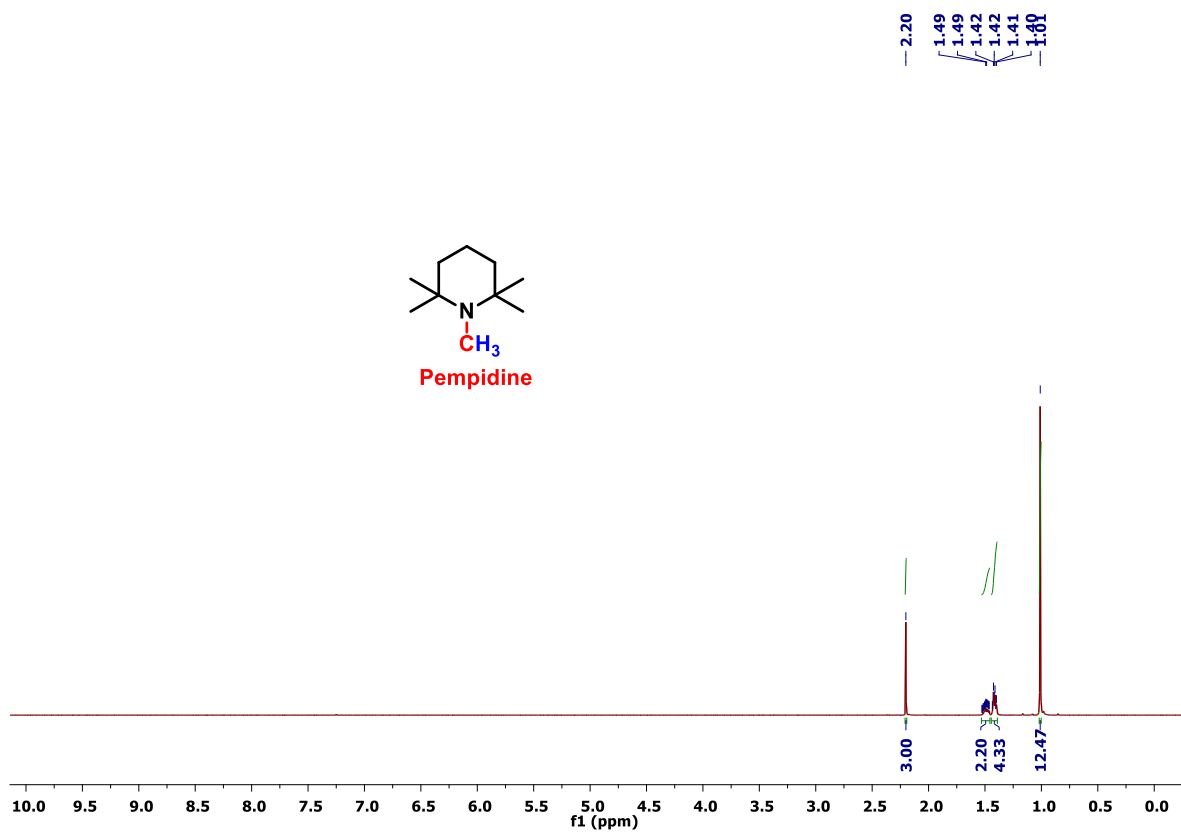

Figure S93. <sup>1</sup>H NMR spectrum of **9** in CDCl<sub>3</sub>.

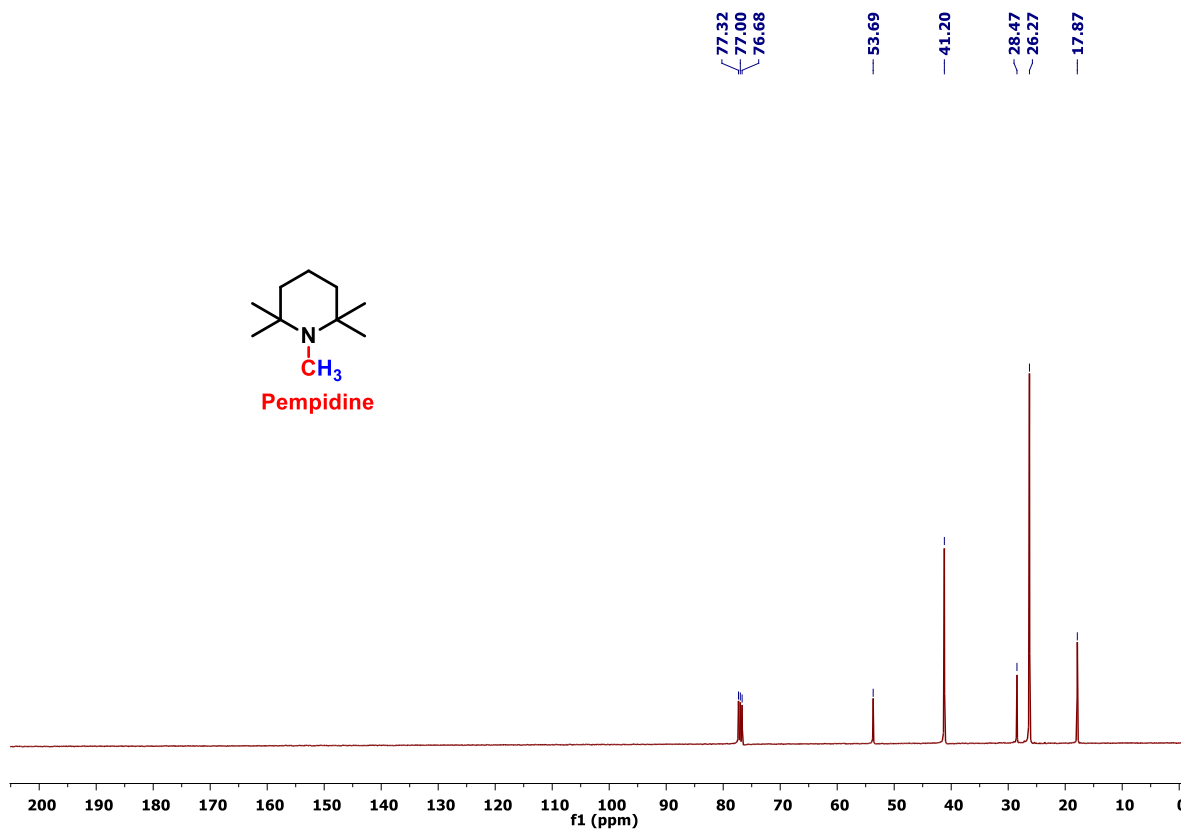

Figure S94. <sup>13</sup>C{<sup>1</sup>H} NMR spectrum of **9** in CDCl<sub>3</sub>.



## VI) Computational Study

### Computational details:

Theoretical calculations were performed with the Gaussian16 program suite<sup>S23</sup>. All theoretical calculations were carried out using the density functional theory (DFT) method with Becke's three-parameter hybrid exchange functionals and the Lee-Yang-Parr correlation functional (B3LYP) employing the 6-31G(d) basis set<sup>S24-S25</sup> for all atoms. The single point energy calculation of each optimized geometries were carried out by m062x method<sup>S26</sup> with 6-31+g(d) basis set considering SMD solvent model<sup>S27</sup> for THF.

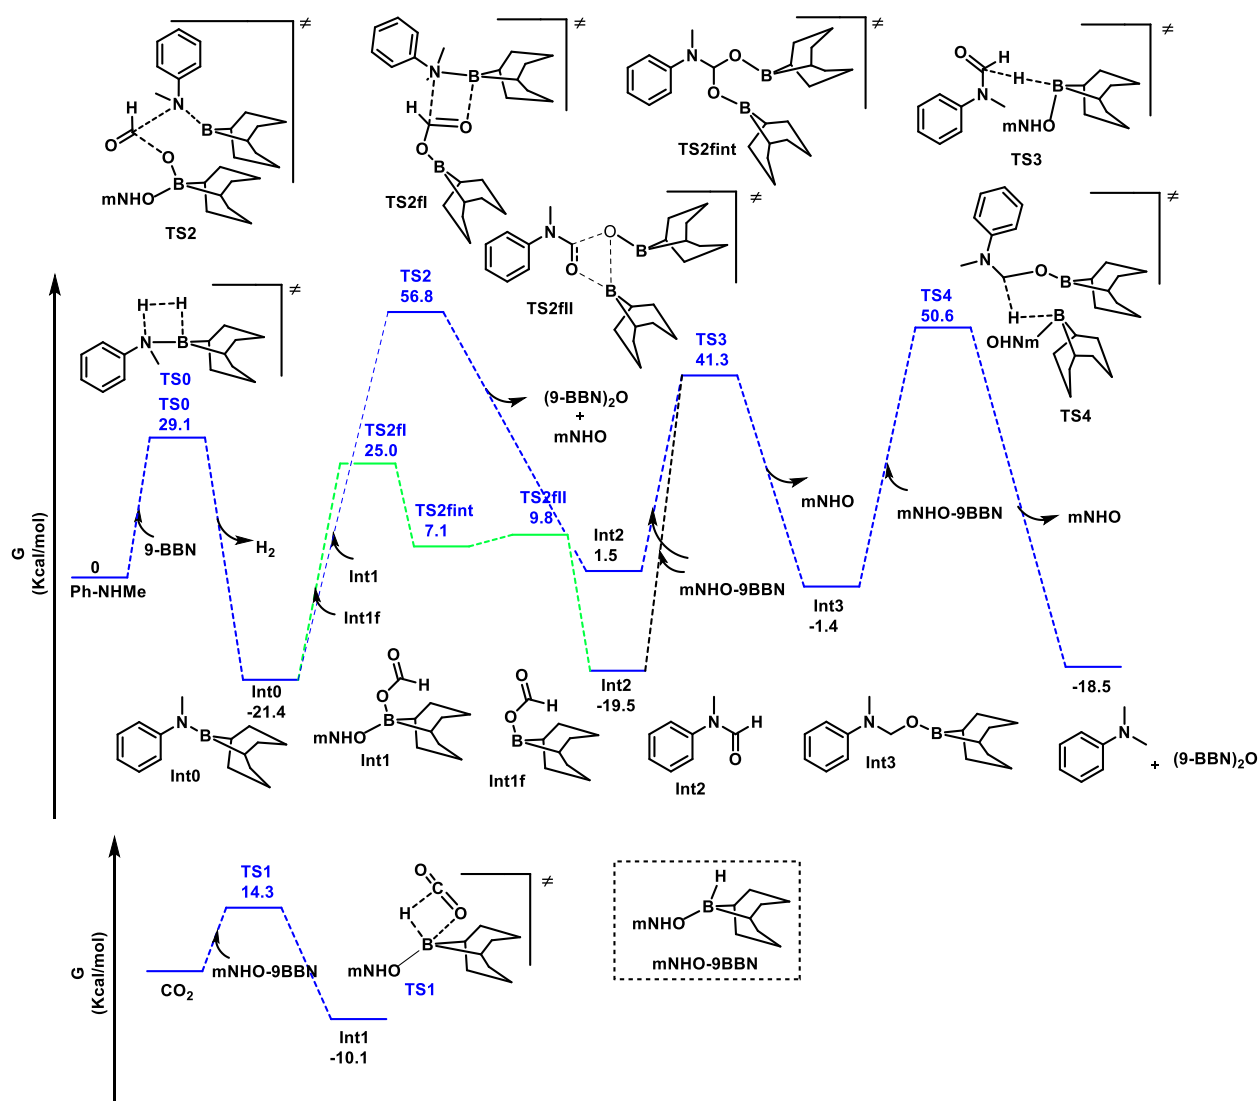

**Figure S95:** Computed Gibbs free energy profile for catalytic N-methylation of amines using *mNHO* as a catalyst. (f= catalyst free)

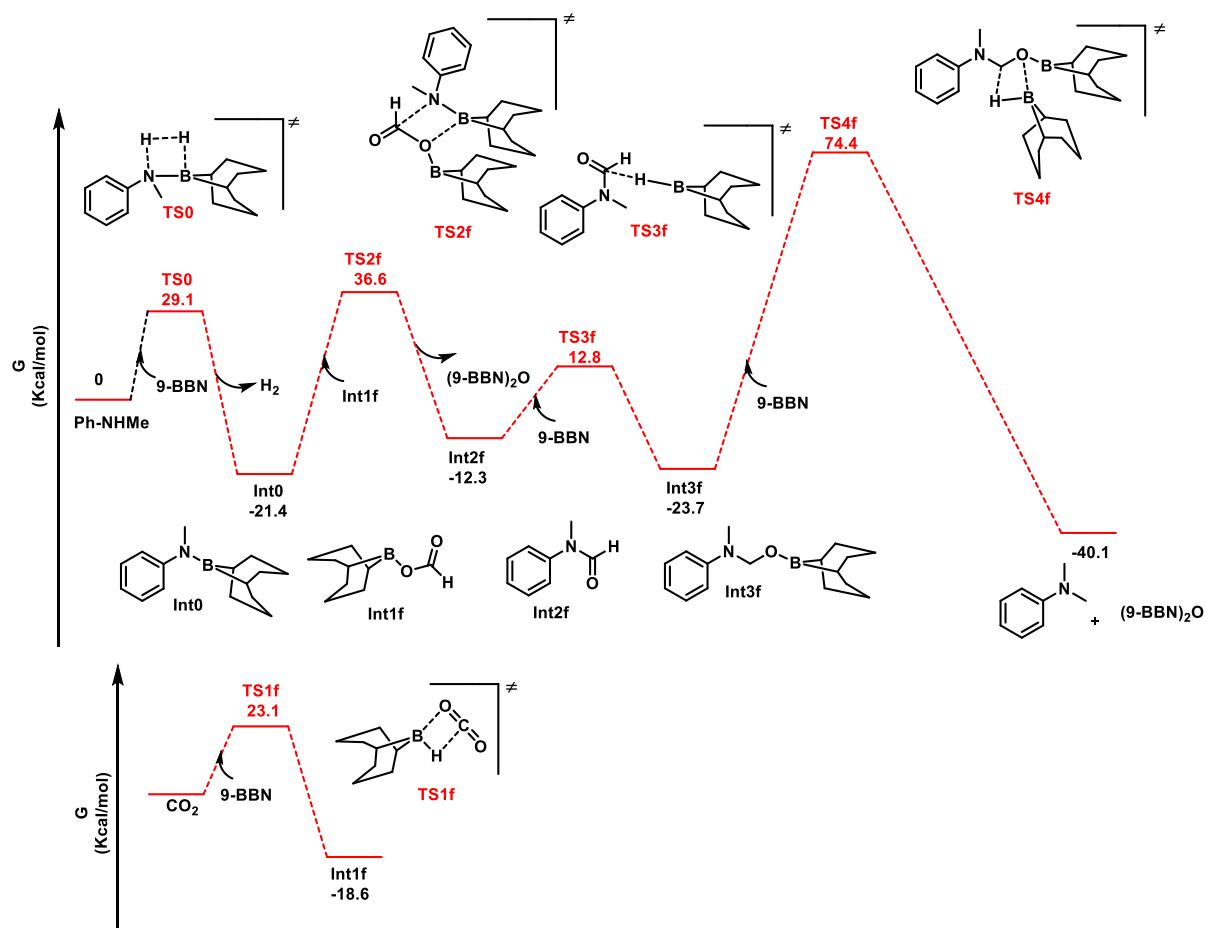

**Figure S96:** Computed Gibbs free energy profile for uncatalysed pathway for N-methylation of amines.

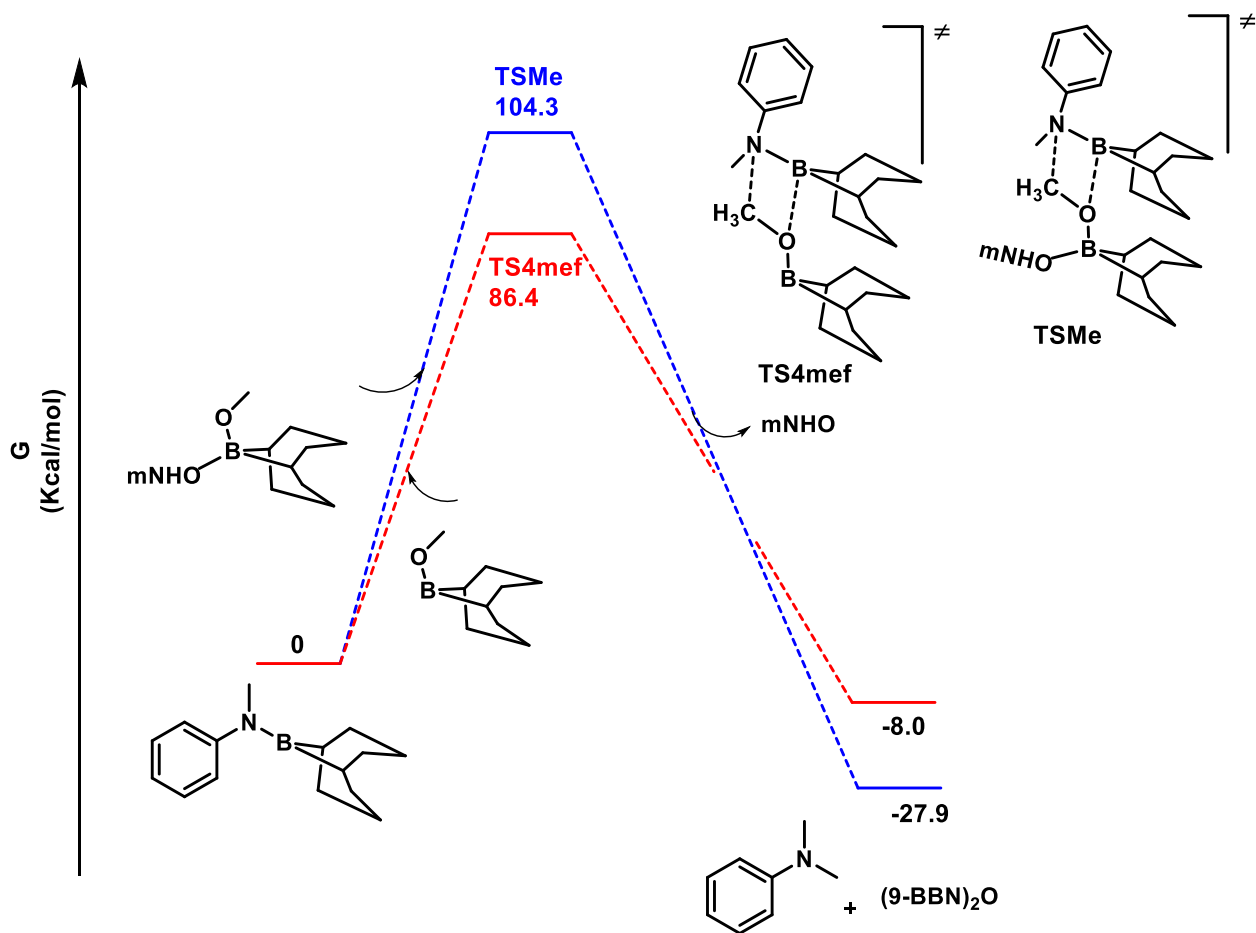

**Figure S97:** Computed Gibbs free energy profile for catalysed and uncatalysed pathway for N-methylation of amines through methyl transfer.

**Table S3** Energies, enthalpies, and free energies (in Hartree) of the structures calculated with M06-2X/6-311+G(d)//B3LYP/6-31G(d).

| Structure                         | ZPE     | $\Delta E$ | $\Delta H$ | $\Delta G$ | E          | H          | G          | IR Freq  | Intensity |
|-----------------------------------|---------|------------|------------|------------|------------|------------|------------|----------|-----------|
| mNHO                              | 0.76181 | 0.80284    | 0.80378    | 0.68880    | -1660.6344 | -1660.6334 | -1660.7484 |          |           |
| 9-BBN                             | 0.2193  | 0.2269     | 0.2279     | 0.18760    | -338.5012  | -338.5003  | -338.5406  |          |           |
| CO <sub>2</sub>                   | 0.01159 | 0.01424    | 0.01518    | -0.00912   | -188.5667  | -188.5657  | -188.5900  |          |           |
| 9BBN-formate (Int1f)              | 0.23631 | 0.24743    | 0.24837    | 0.19903    | -527.1004  | -527.0995  | -527.1488  |          |           |
| 9BBN-OMe                          | 0.25486 | 0.26576    | 0.26670    | 0.21792    | -453.05605 | -453.05510 | -453.10388 |          |           |
| N-MeAniline                       | 0.14588 | 0.15308    | 0.15403    | 0.11459    | -326.7565  | -326.7555  | -326.7950  |          |           |
| AniFormBBN (Int3f)                | 0.38216 | 0.39985    | 0.40080    | 0.33431    | -778.6328  | -778.6319  | -778.6984  |          |           |
| N-methylaniline-BBN (Int0)        | 0.34826 | 0.36366    | 0.36460    | 0.30441    | -664.1342  | -664.1332  | -664.1934  |          |           |
| N-methyl N-formyl aniline (Int2f) | 0.15606 | 0.16494    | 0.16588    | 0.12179    | -440.0856  | -440.0846  | -440.1287  |          |           |
| BOB dimer                         | 0.42863 | 0.44634    | 0.44729    | 0.38105    | -751.1705  | -751.1695  | -751.2358  |          |           |
| N,N- dimethyl aniline             | 0.17427 | 0.18290    | 0.18384    | 0.14078    | -366.0322  | -366.0313  | -366.0744  |          |           |
| TS0                               | 0.36408 | 0.37936    | 0.38031    | 0.32189    | -665.2206  | -665.2196  | -665.2780  | -1442.73 | 1841.6838 |
| TS1f                              | 0.23253 | 0.24300    | 0.24395    | 0.19669    | -527.0404  | -527.0395  | -527.0867  | -478.60  | 354.3011  |
| TS2f(formyl)                      | 0.58795 | 0.61366    | 0.61460    | 0.53381    | -1191.1791 | -1191.1782 | -1191.2590 | -236.14  | 43.3361   |
| TS2fI                             | 0.58781 | 0.61364    | 0.61458    | 0.53134    | -1191.1973 | -1191.1963 | -1191.2796 | -70.29   | 8.0403    |
| TS2fII                            | 0.58707 | 0.61331    | 0.61425    | 0.53072    | -1191.2171 | -1191.2162 | -1191.2997 | -149.64  | 121.6595  |
| TS2fInt                           | 0.58856 | 0.61535    | 0.61629    | 0.52905    | -1191.2330 | -1191.2321 | -1191.3193 |          |           |
| TS3f                              | 0.37759 | 0.39451    | 0.39545    | 0.33255    | -778.57655 | -778.57561 | -778.63851 | -577.83  | 1247.0993 |
| TS4f                              | 0.59606 | 0.62332    | 0.62426    | 0.53445    | -1117.0279 | -1117.0269 | -1117.1167 | -482.00  | 42.7812   |
| TS4Mef                            | 0.60416 | 0.62987    | 0.63081    | 0.55091    | -1117.0806 | -1117.0797 | -1117.1596 | -493.68  | 433.1766  |
| mNHO                              | 0.76181 | 0.80284    | 0.80378    | 0.68880    | -1660.6344 | -1660.6334 | -1660.7484 |          |           |
| mNHO-9BBN                         | 0.98602 | 1.03526    | 1.03621    | 0.90374    | -1999.1597 | -1999.1587 | -1999.2912 |          |           |
| mNHO-BBN formate(Int1)            | 1.00235 | 1.0549     | 1.05585    | 0.91662    | -2187.7572 | -2187.7563 | -2187.8955 |          |           |
| mNHO-BBNOMe                       | 1.01953 | 1.07165    | 1.07260    | 0.93517    | -2113.6842 | -2113.6833 | -2113.8207 |          |           |
| TS1                               | 0.99969 | 1.05231    | 1.05326    | 0.91320    | -2187.6979 | -2187.6970 | -2187.8370 | -47.79   | 6.1878    |
| TS2                               | 1.35472 | 1.42132    | 1.42226    | 1.25685    | -2851.7840 | -2851.7830 | -2851.9484 | -250.17  | 41.6267   |
| TS3                               | 1.14394 | 1.20255    | 1.20350    | 1.05043    | -2439.1884 | -2439.1875 | -2439.3405 | -130.12  | 97.7184   |

|                |         |         |         |          |            |            |            |         |           |
|----------------|---------|---------|---------|----------|------------|------------|------------|---------|-----------|
| TS4            | 1.36412 | 1.43355 | 1.43449 | 1.25437  | -2777.7260 | -2777.7251 | -2777.9052 | -349.31 | 1806.1306 |
| TS4Me          | 1.37003 | 1.43692 | 1.43786 | 1.27100  | -2777.6820 | -2777.6811 | -2777.8479 | -571.37 | 508.0835  |
| H <sub>2</sub> | 0.01014 | 0.01250 | 0.01345 | -0.00134 | -1.1629    | -1.16203   | -1.17682   |         |           |

**Table S4** Energies, enthalpies, and free energies (in Hartree) of the structures calculated with M06-2X/6-311+G(d)-SMD(THF)//B3LYP/6-31G(d).

| Structure                        | ZPE     | $\Delta E$ | $\Delta H$ | $\Delta G$ | E          | H          | G          | IR Freq  | Intensity |
|----------------------------------|---------|------------|------------|------------|------------|------------|------------|----------|-----------|
| 9-BBN                            | 0.21946 | 0.22711    | 0.22806    | 0.18754    | -338.3438  | -338.3429  | -338.3834  |          |           |
| 9BBN-formate (Int1f)             | 0.23659 | 0.24769    | 0.24864    | 0.19960    | -526.8915  | -526.8906  | -526.9396  |          |           |
| BBN-OMe                          | 0.25540 | 0.26614    | 0.26709    | 0.21936    | -452.8597  | -452.8588  | -452.9065  |          |           |
| N-Me Aniline                     | 0.14651 | 0.15370    | 0.15465    | 0.11529    | -326.6251  | -326.6241  | -326.6635  |          |           |
| N-methyl N-formyl aniline(Int2f) | 0.15681 | 0.16567    | 0.16662    | 0.12258    | -439.9207  | -439.9197  | -439.9637  |          |           |
| N-methyl aniline-9BBN(Int0)      | 0.34895 | 0.36434    | 0.36528    | 0.30599    | -663.8583  | -663.8573  | -663.9166  |          |           |
| N-methyl aniline-OBBN (Int3f)    | 0.38307 | 0.40056    | 0.40151    | 0.33472    | -778.3191  | -778.3182  | -778.3850  |          |           |
| N,N-dimethylaniline              | 0.1748  | 0.1826     | 0.1835     | 0.1425     | -365.8812  | -365.8802  | -365.9213  |          |           |
| CO <sub>2</sub>                  | 0.01165 | 0.01426    | 0.01521    | -0.00905   | -188.5032  | -188.5022  | -188.5265  |          |           |
| H <sub>2</sub>                   | 0.0101  | 0.0124     | 0.0134     | -0.0013    | -1.1505    | -1.1496    | -1.1644    |          |           |
| TS0                              | 0.36458 | 0.37988    | 0.38082    | 0.32273    | -664.94353 | -664.94258 | -665.0006  | -1612.06 | 4045.8267 |
| TS1f                             | 0.23256 | 0.24301    | 0.24395    | 0.19694    | -526.8270  | -526.8261  | -526.8731  | -575.54  | 841.9556  |
| TS2f                             | 0.58894 | 0.61461    | 0.61556    | 0.53601    | -1190.7193 | -1190.7184 | -1190.7979 | -271.76  | 133.1852  |
| TS2fI                            | 0.58887 | 0.61465    | 0.61560    | 0.53388    | -1190.7357 | -1190.7347 | -1190.8165 | 133.1852 | 10.3273   |
| TS2fII                           | 0.58762 | 0.61396    | 0.61490    | 0.53210    | -1190.7475 | -1190.7465 | -1190.8293 | -170.48  | 245.8732  |
| TS2fInt                          | 0.58960 | 0.61631    | 0.61725    | 0.53127    | -1190.7599 | -1190.7589 | -1190.8449 |          |           |
| TS3f                             | 0.37872 | 0.39552    | 0.39646    | 0.33441    | -778.2657  | -778.2647  | -778.3268  | -648.30  | 2430.6904 |
| TS4f                             | 0.5971  | 0.62445    | 0.6253     | 0.5378     | -          | -          | -          | -455.71  | 134.7     |

|                         |         |         |         |         |            |            |            |                   |                        |
|-------------------------|---------|---------|---------|---------|------------|------------|------------|-------------------|------------------------|
|                         | 6       |         | 9       | 5       | 1116.56335 | 1116.56240 | 1116.64994 |                   | 440                    |
| mNHO-9BBN               | 0.98800 | 1.03721 | 1.03816 | 0.90516 | -1998.3899 | -1998.3890 | -1998.5220 |                   |                        |
| mNHO-9BBNformate (Int1) | 1.00321 | 1.05436 | 1.05530 | 0.92048 | -2186.9307 | -2186.9298 | -2187.0646 |                   |                        |
| mNHO-BBNOMe             | 1.02155 | 1.07360 | 1.07454 | 0.93714 | -2112.8778 | -2112.8769 | -2113.0143 |                   |                        |
| TS1                     | 1.00110 | 1.05221 | 1.05315 | 0.91729 | -2186.8908 | -2186.8899 | -2187.0258 | -62.18<br>-52.57  | 3.0635<br><br>14.7477  |
| TS2                     | 1.35719 | 1.42311 | 1.42405 | 1.26139 | -2850.7290 | -2850.7281 | -2850.8907 | -282.58<br>-43.38 | 133.3135<br><br>2.2251 |
| TS3                     | 1.14560 | 1.20361 | 1.20455 | 1.05299 | -2438.2692 | -2438.2683 | -2438.4199 | -153.46<br>-26.93 | 252.1692<br>7.3460     |
| TS4                     | 1.36570 | 1.43538 | 1.43632 | 1.25642 | -2776.6474 | -2776.6465 | -2776.8264 | -463.24           | 4557.6735              |
| TS4Me                   | 1.37236 | 1.43853 | 1.43947 | 1.27613 | -2776.6301 | -2776.6292 | -2776.7925 | -668.82<br>-4.57  | 1073.3551<br>4.2711    |

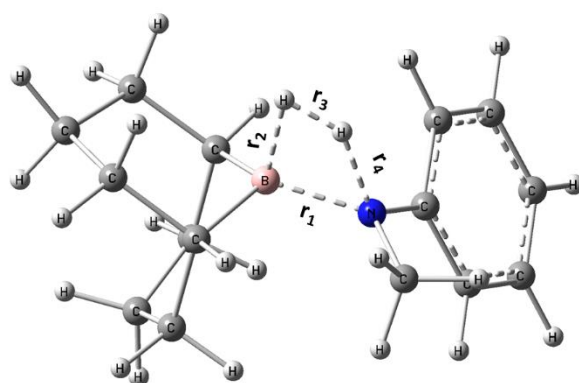

$$\begin{aligned}
 r_1 &= 1.626 \text{ \AA} \\
 r_2 &= 1.405 \text{ \AA} \\
 r_3 &= 0.987 \text{ \AA} \\
 r_4 &= 1.386 \text{ \AA} \\
 \Delta G_1^\ddagger &= 29.10 \text{ Kcal/mol}
 \end{aligned}$$

TS0

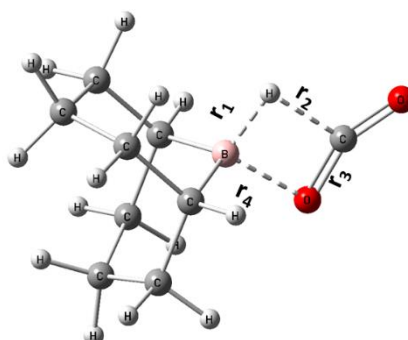

$$\begin{aligned}
 r_1 &= 1.294 \text{ \AA} \\
 r_2 &= 1.577 \text{ \AA} \\
 r_3 &= 1.231 \text{ \AA} \\
 r_4 &= 1.708 \text{ \AA} \\
 \Delta G_2^\ddagger &= 23.12 \text{ Kcal/mol}
 \end{aligned}$$

**TS1f**

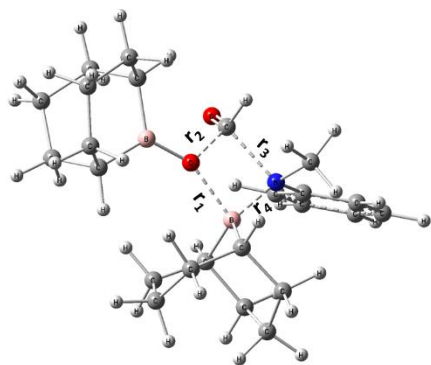

$r_1 = 1.818 \text{ \AA}$   
 $r_2 = 1.570 \text{ \AA}$   
 $r_3 = 1.912 \text{ \AA}$   
 $r_4 = 1.585 \text{ \AA}$

$\Delta G_3^\ddagger = 36.63 \text{ Kcal/mol}$

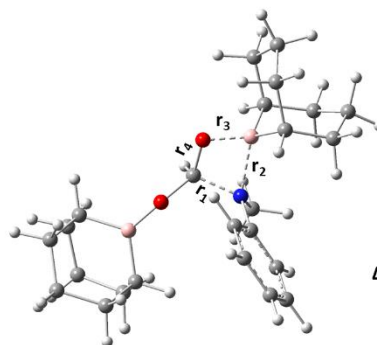

$r_1 = 1.556 \text{ \AA}$   
 $r_2 = 1.906 \text{ \AA}$   
 $r_3 = 1.491 \text{ \AA}$   
 $r_4 = 1.361 \text{ \AA}$

$\Delta G_{3f}^\ddagger = 25.00 \text{ Kcal/mol}$

**TS2f**

**TS2fi**

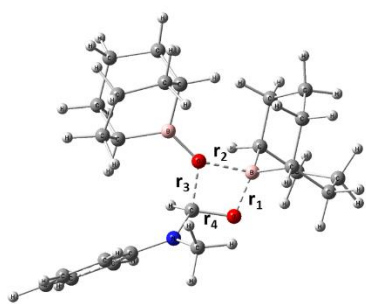

$r_1 = 1.481 \text{ \AA}$   
 $r_2 = 1.824 \text{ \AA}$   
 $r_3 = 1.626 \text{ \AA}$   
 $r_4 = 1.348 \text{ \AA}$

$\Delta G_{3f}^\ddagger = 9.77 \text{ Kcal/mol}$

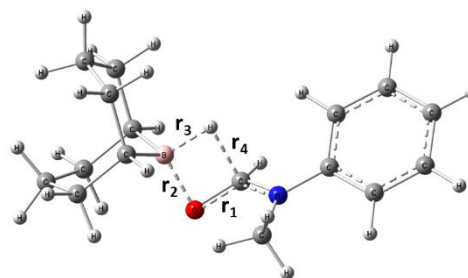

$r_1 = 1.321 \text{ \AA}$   
 $r_2 = 1.545 \text{ \AA}$   
 $r_3 = 1.332 \text{ \AA}$   
 $r_4 = 1.551 \text{ \AA}$

$\Delta G_4^\ddagger = 12.83 \text{ Kcal/mol}$

**TS2fii**

**TS3f**

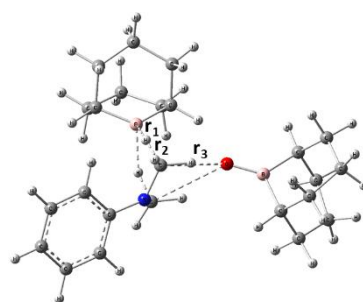

$r_1 = 1.19 \text{ \AA}$   
 $r_2 = 1.68 \text{ \AA}$   
 $r_3 = 2.92 \text{ \AA}$

$\Delta G_4^\ddagger = 74.40 \text{ Kcal/mol}$

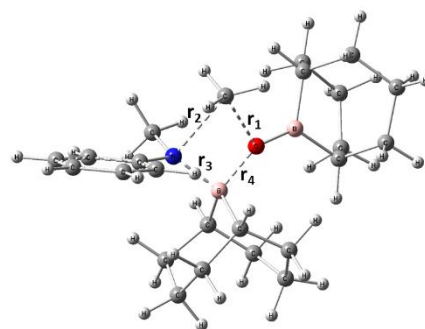

$r_1 = 2.061 \text{ \AA}$   
 $r_2 = 2.275 \text{ \AA}$   
 $r_3 = 1.605 \text{ \AA}$   
 $r_4 = 1.596 \text{ \AA}$

$\Delta G_{mef}^\ddagger = 86.40 \text{ Kcal/mol}$

**TS4f**

**TSmef**

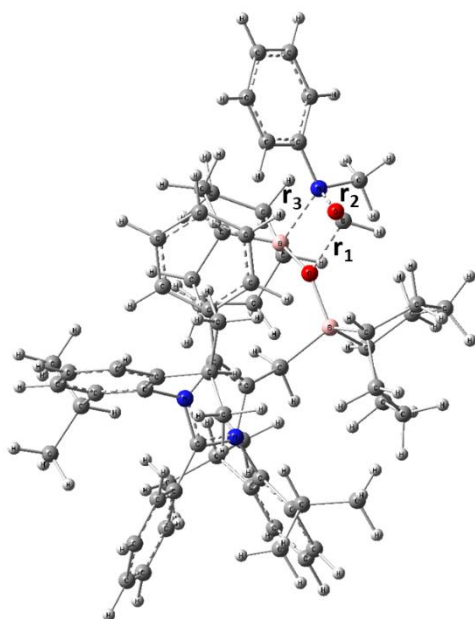

$$r_1 = 1.808 \text{ \AA}$$

$$r_2 = 1.597 \text{ \AA}$$

$$r_3 = 1.863 \text{ \AA}$$

$$\Delta G_{3,\ddagger} = 56.80 \text{ Kcal/mol}$$

**TS2**

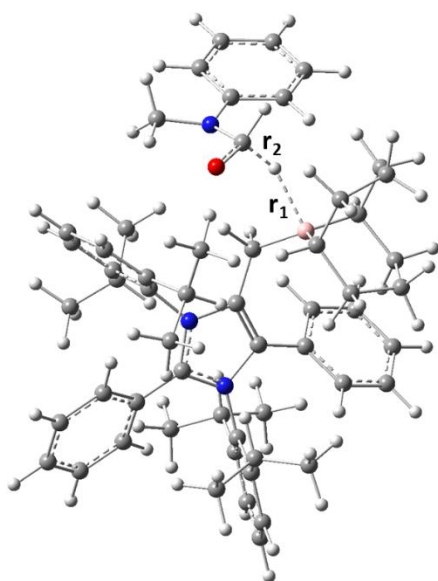

$$r_1 = 1.836 \text{ \AA}$$

$$r_2 = 1.192 \text{ \AA}$$

$$\Delta G_{4,\ddagger} = 41.80 \text{ Kcal/mol}$$

**TS3**



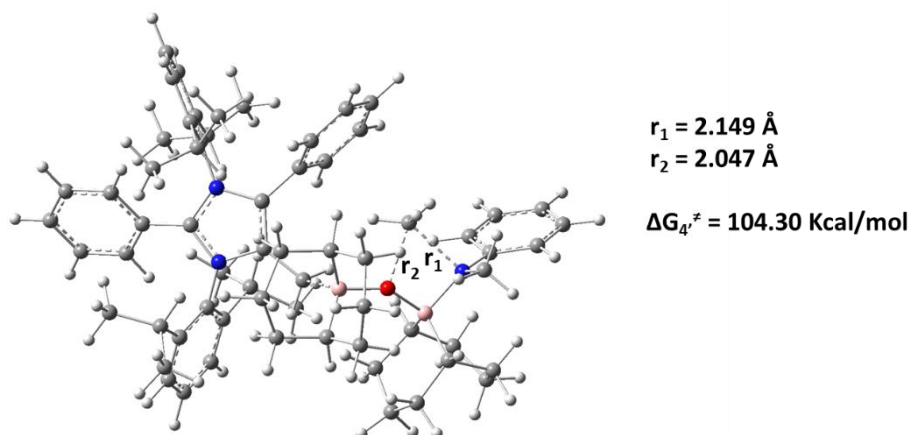

**TS4me**

**Figure S98** Optimized structures of the transition states involved in the potential energy surface of catalytic N-methylation of amines by the mNHO catalyst.

## Co-ordinates:

9BBN

0 1

|   |             |             |             |
|---|-------------|-------------|-------------|
| C | -0.00004200 | -1.30476700 | 0.70759800  |
| C | -1.31216000 | -1.29521400 | -0.13643900 |
| C | 0.00006100  | 1.30476700  | 0.70759800  |
| C | -1.31201000 | 1.29534500  | -0.13650600 |
| C | 1.57594700  | -0.00005900 | -0.93353200 |
| C | 1.31212800  | 1.29520400  | -0.13654600 |
| C | 1.31197700  | -1.29533600 | -0.13661300 |
| C | -1.57606100 | 0.00005900  | -0.93339000 |
| H | -0.00003400 | -2.22923500 | 1.29980900  |
| H | -2.15374900 | -1.46018300 | 0.55275100  |
| H | -1.31753600 | -2.15474500 | -0.82293900 |
| H | 0.00013400  | 2.22923600  | 1.29980900  |
| H | -1.31723500 | 2.15483600  | -0.82305800 |
| H | -2.15360700 | 1.46047100  | 0.55263500  |
| H | 2.62066300  | -0.00011100 | -1.27273500 |
| H | 0.97498900  | 0.00000500  | -1.84732300 |
| H | 2.15377600  | 1.46015400  | 0.55257700  |
| H | 1.31746200  | 2.15474400  | -0.82303600 |
| H | 1.31716200  | -2.15483500 | -0.82315500 |
| H | 2.15363400  | -1.46044200 | 0.55246200  |
| H | -2.62081100 | 0.00011100  | -1.27249000 |
| H | -0.97519700 | -0.00000500 | -1.84724300 |
| B | 0.00008500  | 0.00000000  | 1.58470100  |
| H | 0.00087900  | -0.00000100 | 2.78541000  |

## 9BBNformate

0 1

|   |             |             |             |
|---|-------------|-------------|-------------|
| C | 0.18325100  | 0.15847900  | 1.09640200  |
| C | -0.22568800 | 1.64258200  | 0.83050600  |
| C | -0.67765900 | -0.48815600 | -1.29681300 |
| C | -1.07391300 | 1.00402600  | -1.54265200 |
| C | -2.15897800 | -0.99188300 | 0.79979900  |
| C | -1.79619000 | -1.35774700 | -0.65584900 |
| C | -0.94159400 | -0.72637400 | 1.71150200  |
| C | -1.29484300 | 1.84748200  | -0.26661100 |
| H | 1.02270500  | 0.17555500  | 1.79960400  |

|   |             |             |             |
|---|-------------|-------------|-------------|
| H | 0.68750100  | 2.18430700  | 0.54833400  |
| H | -0.57369800 | 2.10171800  | 1.76707200  |
| H | -0.41824800 | -0.92721200 | -2.26914900 |
| H | -1.97591500 | 1.04801100  | -2.17018900 |
| H | -0.27275800 | 1.46780300  | -2.13674400 |
| H | -2.75220400 | -1.80875900 | 1.23215100  |
| H | -2.81981600 | -0.12034400 | 0.80634900  |
| H | -1.45887700 | -2.40448300 | -0.68202700 |
| H | -2.70326400 | -1.32036400 | -1.27663500 |
| H | -1.28754800 | -0.28013500 | 2.65513200  |
| H | -0.49216400 | -1.69240700 | 1.98663000  |
| H | -1.31235300 | 2.90923500  | -0.54658100 |
| H | -2.28764300 | 1.63995700  | 0.14278100  |
| B | 0.54254600  | -0.42601900 | -0.31446600 |
| O | 1.79782700  | -0.85523700 | -0.75373400 |
| C | 2.98965700  | -0.52018800 | -0.20089000 |
| H | 3.74146200  | -1.28688600 | -0.44274600 |
| O | 3.22290100  | 0.48458400  | 0.41698200  |

### 9BBNOMe

0 1

|   |             |             |             |
|---|-------------|-------------|-------------|
| C | 0.35816600  | -0.00007300 | 1.14585300  |
| C | -0.45866000 | 1.31085900  | 1.35194500  |
| C | -0.33438600 | 0.00002900  | -1.38413400 |
| C | -1.14326900 | 1.30967500  | -1.15531900 |
| C | -1.56582300 | -1.57548200 | 0.30683200  |
| C | -1.14343000 | -1.30953100 | -1.15540000 |
| C | -0.45875100 | -1.31095400 | 1.35184500  |
| C | -1.56567300 | 1.57557600  | 0.30692200  |
| H | 1.16484800  | -0.00012400 | 1.89230100  |
| H | 0.25064600  | 2.15208900  | 1.33006800  |
| H | -0.90308700 | 1.32190100  | 2.35843400  |
| H | 0.01738800  | 0.00004200  | -2.42452500 |
| H | -2.03813600 | 1.32078200  | -1.79558400 |
| H | -0.51999000 | 2.14896800  | -1.49814200 |
| H | -1.89214200 | -2.62046600 | 0.39747800  |
| H | -2.44822600 | -0.97615500 | 0.54941400  |
| H | -0.52026100 | -2.14887100 | -1.49830500 |
| H | -2.03831500 | -1.32047400 | -1.79564300 |
| H | -0.90315400 | -1.32206600 | 2.35834500  |
| H | 0.25047900  | -2.15224600 | 1.32986200  |
| H | -1.89188400 | 2.62058900  | 0.39761700  |

|   |             |             |             |
|---|-------------|-------------|-------------|
| H | -2.44814800 | 0.97633000  | 0.54944100  |
| B | 0.86069400  | -0.00003800 | -0.35449800 |
| O | 2.14669600  | -0.00002900 | -0.79921000 |
| C | 3.26631700  | -0.00005000 | 0.08277900  |
| H | 4.16909900  | 0.00029900  | -0.53403300 |
| H | 3.27327800  | 0.89093500  | 0.72100700  |
| H | 3.27362700  | -0.89139900 | 0.72049900  |

**N-methylanilineformateBBN**

0 1

|   |             |             |             |
|---|-------------|-------------|-------------|
| C | 2.38585500  | 0.85621500  | 0.76647500  |
| C | 3.48429100  | 0.10717900  | 1.58102900  |
| C | 2.20131200  | -1.21562100 | -0.82815500 |
| C | 3.29842800  | -1.94530900 | -0.00028300 |
| C | 3.55191300  | 0.89401100  | -1.58592300 |
| C | 2.74214800  | -0.35300500 | -2.00394200 |
| C | 2.92837900  | 1.70073200  | -0.42553000 |
| C | 4.22044300  | -1.02165200 | 0.82578300  |
| H | 1.90293900  | 1.55924500  | 1.46010400  |
| H | 3.00193300  | -0.32379400 | 2.47127400  |
| H | 4.22341200  | 0.82787300  | 1.96139600  |
| H | 1.53738500  | -1.98091400 | -1.25171600 |
| H | 3.91568700  | -2.57508700 | -0.65833800 |
| H | 2.79037700  | -2.63861200 | 0.68647700  |
| H | 3.66006100  | 1.55614200  | -2.45568400 |
| H | 4.57125100  | 0.59956900  | -1.31961800 |
| H | 1.87771300  | -0.02604100 | -2.60068200 |
| H | 3.35460400  | -0.96999500 | -2.67841200 |
| H | 3.66308000  | 2.43375200  | -0.06039100 |
| H | 2.08960100  | 2.29234200  | -0.82354400 |
| H | 4.77237100  | -1.62990000 | 1.55514800  |
| H | 4.98516900  | -0.58772600 | 0.17507100  |
| B | 1.43051100  | -0.25466700 | 0.16006900  |
| O | 0.10638800  | -0.46205100 | 0.40044300  |
| N | -1.79328600 | 0.98057700  | 0.59536500  |
| C | -2.94321100 | 0.26865500  | 0.21979800  |
| C | -4.07542900 | 0.94888300  | -0.27036700 |
| C | -3.01009200 | -1.13546600 | 0.33057800  |
| C | -5.23460100 | 0.25145200  | -0.60653400 |
| H | -4.06088800 | 2.02796500  | -0.37595300 |
| C | -4.17934900 | -1.81655600 | 0.00103400  |
| H | -2.13372900 | -1.69961900 | 0.62728700  |

|   |             |             |             |
|---|-------------|-------------|-------------|
| C | -5.30361800 | -1.13437300 | -0.46711300 |
| H | -6.09340600 | 0.80576400  | -0.97712300 |
| H | -4.19957700 | -2.89959900 | 0.09424100  |
| H | -6.20905100 | -1.67342800 | -0.73003700 |
| C | -1.56803500 | 2.31295000  | 0.05376900  |
| H | -2.25065600 | 3.05497900  | 0.49007400  |
| H | -0.54679400 | 2.62492600  | 0.28401200  |
| H | -1.69342500 | 2.33384100  | -1.03681800 |
| C | -0.72488000 | 0.32866500  | 1.27457500  |
| H | -1.13244000 | -0.36488100 | 2.01447700  |
| H | -0.11760500 | 1.07833600  | 1.78614200  |

### **N-methylanilineBBN**

0 1

|   |             |             |             |
|---|-------------|-------------|-------------|
| C | -0.78859500 | -1.09376100 | 0.17033800  |
| C | -1.52077600 | -1.29972600 | 1.52714100  |
| C | -2.08718100 | 1.14780100  | -0.17453600 |
| C | -2.81151500 | 0.92383400  | 1.18483100  |
| C | -2.85681500 | -1.01870300 | -1.43462400 |
| C | -2.81159300 | 0.52421400  | -1.40303000 |
| C | -1.52440100 | -1.70135000 | -1.05768000 |
| C | -2.85404300 | -0.53719000 | 1.68211900  |
| H | 0.17995300  | -1.60356000 | 0.24856600  |
| H | -0.83634300 | -0.97455000 | 2.32518400  |
| H | -1.69729900 | -2.37167500 | 1.70351400  |
| H | -2.06768600 | 2.23344600  | -0.34246500 |
| H | -3.83842600 | 1.31654600  | 1.13440300  |
| H | -2.29430700 | 1.53501300  | 1.93987000  |
| H | -3.15166000 | -1.34387300 | -2.44189400 |
| H | -3.65190000 | -1.37518800 | -0.77286400 |
| H | -2.29332000 | 0.87744100  | -2.30736000 |
| H | -3.83785000 | 0.91536300  | -1.47444500 |
| H | -1.70336500 | -2.77571200 | -0.89928800 |
| H | -0.84169700 | -1.63621700 | -1.91841300 |
| H | -3.14677400 | -0.54242400 | 2.74114100  |
| H | -3.64940500 | -1.07853100 | 1.16100300  |
| B | -0.65282200 | 0.47032800  | -0.07111700 |
| N | 0.58606800  | 1.14133100  | -0.17207900 |
| C | 1.84329500  | 0.44709200  | -0.07071000 |

|   |             |             |             |
|---|-------------|-------------|-------------|
| C | 2.50041600  | 0.35476400  | 1.16126800  |
| C | 2.43673100  | -0.10996400 | -1.20872600 |
| C | 3.73047900  | -0.29770100 | 1.25567000  |
| H | 2.03460100  | 0.78847900  | 2.04219500  |
| C | 3.66620400  | -0.76381600 | -1.11277100 |
| H | 1.92267600  | -0.03322200 | -2.16303500 |
| C | 4.31657100  | -0.85821600 | 0.11900500  |
| H | 4.22867500  | -0.37151800 | 2.21878300  |
| H | 4.11455400  | -1.20103500 | -2.00105100 |
| H | 5.27328000  | -1.36797900 | 0.19335100  |
| C | 0.75959200  | 2.58108200  | -0.38745200 |
| H | 1.30810700  | 2.77330900  | -1.31896800 |
| H | -0.21194100 | 3.07202900  | -0.44661300 |
| H | 1.33154600  | 3.03273600  | 0.43346900  |

### BOB dimer

0 1

|   |             |             |             |
|---|-------------|-------------|-------------|
| C | 2.23960400  | 0.80423700  | -1.05056500 |
| C | 3.08217800  | 1.83109200  | -0.23927600 |
| C | 2.20658500  | -0.78933900 | 1.03526800  |
| C | 3.04858700  | 0.25366800  | 1.82797700  |
| C | 3.85407200  | -1.25994700 | -0.94824900 |
| C | 3.04614100  | -1.83158900 | 0.23873500  |
| C | 3.07786600  | -0.25404900 | -1.82819500 |
| C | 3.85731800  | 1.24685400  | 0.96318500  |
| H | 1.64351700  | 1.36384700  | -1.78458100 |
| H | 2.39469000  | 2.60657500  | 0.13028000  |
| H | 3.78813400  | 2.35001800  | -0.90466300 |
| H | 1.58823300  | -1.33946600 | 1.75805200  |
| H | 3.73211800  | -0.26065800 | 2.51976300  |
| H | 2.35553700  | 0.82572600  | 2.46297100  |
| H | 4.19050900  | -2.09363200 | -1.57930200 |
| H | 4.77009700  | -0.79204100 | -0.57625000 |
| H | 2.35206100  | -2.59442000 | -0.14431100 |
| H | 3.72984300  | -2.36302800 | 0.91741400  |
| H | 3.78227700  | 0.24813300  | -2.50791300 |
| H | 2.38674400  | -0.81494100 | -2.47487900 |
| H | 4.19489000  | 2.07507100  | 1.60079000  |
| H | 4.77308300  | 0.76433700  | 0.60955700  |
| B | 1.34599600  | 0.01261700  | -0.01775300 |
| O | -0.00005400 | 0.01801200  | -0.03678500 |

|   |             |             |             |
|---|-------------|-------------|-------------|
| C | -2.21894600 | 1.03848600  | 0.80179700  |
| C | -3.10059000 | 1.82854700  | -0.20897300 |
| C | -2.22706800 | -1.01743200 | -0.83098000 |
| C | -3.10615300 | -0.20664700 | -1.82720000 |
| C | -3.80808300 | -0.99564500 | 1.25973700  |
| C | -3.02874400 | -1.83680500 | 0.22377600  |
| C | -3.01853700 | 0.19819300  | 1.84207900  |
| C | -3.90375900 | 0.96180200  | -1.20500700 |
| H | -1.60975500 | 1.76554700  | 1.35639700  |
| H | -2.43570800 | 2.49317700  | -0.78047300 |
| H | -3.79286000 | 2.49115900  | 0.33152300  |
| H | -1.62229300 | -1.72510300 | -1.41477900 |
| H | -3.80200300 | -0.87941900 | -2.35026100 |
| H | -2.44062000 | 0.19786600  | -2.60429000 |
| H | -4.11652000 | -1.65074400 | 2.08564000  |
| H | -4.73977800 | -0.63593600 | 0.81373000  |
| H | -2.31358400 | -2.47856600 | 0.75974300  |
| H | -3.72546400 | -2.52222900 | -0.28137800 |
| H | -3.70803400 | 0.84802700  | 2.40128400  |
| H | -2.30040600 | -0.18364100 | 2.58311700  |
| H | -4.27320900 | 1.60633700  | -2.01402700 |
| H | -4.80080500 | 0.57315400  | -0.71406800 |
| B | -1.34661400 | 0.01782400  | -0.02814200 |

## CO<sub>2</sub>

0 1

|   |            |            |             |
|---|------------|------------|-------------|
| C | 0.00000000 | 0.00000000 | 0.00000000  |
| O | 0.00000000 | 0.00000000 | 1.16914800  |
| O | 0.00000000 | 0.00000000 | -1.16914800 |

## mNHO

0 1

|   |             |             |             |
|---|-------------|-------------|-------------|
| C | 0.90698600  | -3.12854800 | 0.34640100  |
| H | 1.97303600  | -3.30512800 | 0.30765100  |
| H | 0.26129400  | -3.97037100 | 0.54529600  |
| C | 0.39961100  | -1.86271200 | 0.25683500  |
| C | -0.94080200 | -1.33836200 | 0.29970700  |
| C | 0.44407400  | 0.43560800  | -0.06085600 |
| C | 0.93903400  | 1.78669900  | -0.32069100 |
| C | 2.17866900  | 2.21713600  | 0.20682400  |

|   |             |             |             |
|---|-------------|-------------|-------------|
| C | 0.22007400  | 2.71205600  | -1.11287800 |
| C | 2.66254000  | 3.49903100  | -0.03791400 |
| H | 2.76598100  | 1.54762600  | 0.81823700  |
| C | 0.70596700  | 3.99551600  | -1.34338300 |
| H | -0.72293700 | 2.42716400  | -1.55625500 |
| C | 1.93114300  | 4.40260200  | -0.81089300 |
| H | 3.61737800  | 3.79329800  | 0.38969800  |
| H | 0.12429700  | 4.67697700  | -1.95858400 |
| H | 2.31014500  | 5.40314600  | -0.99851100 |
| C | -1.98099200 | 0.93956400  | 0.04668700  |
| C | -2.22778100 | 1.76644900  | 1.16330500  |
| C | -2.80959800 | 0.93973300  | -1.09629200 |
| C | -3.32852600 | 2.62989200  | 1.09544100  |
| C | -3.89580600 | 1.82337900  | -1.10289800 |
| C | -4.15380200 | 2.66335600  | -0.02383900 |
| H | -3.54261000 | 3.28251600  | 1.93690500  |
| H | -4.54955700 | 1.85177500  | -1.96974100 |
| H | -5.00248900 | 3.34156600  | -0.05361700 |
| C | -2.17765800 | -2.09428600 | 0.45137400  |
| C | -3.31511200 | -1.62629600 | 1.15002900  |
| C | -2.26101500 | -3.39100500 | -0.11123900 |
| C | -4.46321900 | -2.40560300 | 1.26881500  |
| H | -3.30131100 | -0.64749000 | 1.61144500  |
| C | -3.40865400 | -4.16746400 | 0.01849600  |
| H | -1.42052000 | -3.77094900 | -0.68068700 |
| C | -4.52222700 | -3.68424100 | 0.70976200  |
| H | -5.31519800 | -2.01159700 | 1.81784700  |
| H | -3.43570100 | -5.15514000 | -0.43579400 |
| H | -5.41617300 | -4.29280600 | 0.81475000  |
| C | 2.64035400  | -0.81309100 | -0.05099800 |
| C | 3.43172300  | -0.94136700 | 1.11397100  |
| C | 3.20114900  | -0.86311900 | -1.34421400 |
| C | 4.81466800  | -1.08227300 | 0.94929600  |
| C | 4.59095100  | -1.00196300 | -1.44932100 |
| C | 5.39252300  | -1.10673900 | -0.31720400 |
| H | 5.44762800  | -1.17776500 | 1.82729500  |
| H | 5.04920200  | -1.03852100 | -2.43354600 |
| H | 6.46892800  | -1.21638800 | -0.42137800 |
| N | 1.21544500  | -0.70115800 | 0.09157400  |
| N | -0.84490500 | 0.04170700  | 0.08269300  |
| C | 2.83925900  | -0.93467700 | 2.52316000  |
| H | 1.76050700  | -0.77678000 | 2.43251200  |
| C | 3.04200800  | -2.29215100 | 3.22577700  |
| H | 2.58386400  | -2.27267100 | 4.22191200  |



|   |             |             |             |
|---|-------------|-------------|-------------|
| H | 2.57521500  | -3.09720300 | 2.65215000  |
| H | 4.10682500  | -2.52267300 | 3.35313400  |
| C | 3.40865600  | 0.20717800  | 3.38948100  |
| H | 4.48931200  | 0.10040800  | 3.53984600  |
| H | 3.22916600  | 1.19141600  | 2.94355200  |
| H | 2.93652700  | 0.19820300  | 4.37894900  |
| C | 2.34778200  | -0.81729900 | -2.60787700 |
| H | 1.32516000  | -0.56178400 | -2.31656200 |
| C | 2.81927900  | 0.26383500  | -3.59764100 |
| H | 2.13712200  | 0.31155900  | -4.45463300 |
| H | 2.84359300  | 1.25187900  | -3.12593500 |
| H | 3.82074400  | 0.05127100  | -3.98979100 |
| C | 2.29216400  | -2.20820400 | -3.27205600 |
| H | 1.89027200  | -2.95147000 | -2.57559100 |
| H | 1.64882700  | -2.18154500 | -4.16008200 |
| H | 3.28915300  | -2.53721700 | -3.58964600 |
| C | -2.57196400 | 0.04263600  | -2.31176800 |
| H | -1.72537300 | -0.61342400 | -2.09204300 |
| C | -3.78925400 | -0.86123900 | -2.59367100 |
| H | -4.66355400 | -0.27216700 | -2.89605600 |
| H | -3.55858400 | -1.55198300 | -3.41290900 |
| H | -4.06235900 | -1.45233300 | -1.71607500 |
| C | -2.21382500 | 0.86047000  | -3.56987800 |
| H | -1.30193600 | 1.45067200  | -3.43149500 |
| H | -2.04880800 | 0.18693500  | -4.41889900 |
| H | -3.02170100 | 1.54886000  | -3.84511900 |
| C | -1.37068400 | 1.75248700  | 2.42894300  |
| H | -0.55953500 | 1.03290600  | 2.28629200  |
| C | -2.17783200 | 1.28757500  | 3.65830500  |
| H | -1.53283800 | 1.26897800  | 4.54455100  |
| H | -3.01404700 | 1.96405400  | 3.87065700  |
| H | -2.58440400 | 0.28081500  | 3.51924400  |
| C | -0.72872900 | 3.12873100  | 2.69632400  |
| H | -0.13912200 | 3.47201700  | 1.84180800  |
| H | -1.48960400 | 3.88867500  | 2.91078200  |
| H | -0.06640700 | 3.07108500  | 3.56803700  |

## mNHO-9BBN

0 1

|   |             |             |             |
|---|-------------|-------------|-------------|
| C | 3.88471200  | -1.71146700 | 0.28045700  |
| C | 2.19055000  | 0.23145700  | -0.89263800 |
| C | 4.65780300  | -1.95584300 | -1.03826500 |
| C | 4.63063500  | 0.77907500  | 0.25847300  |
| C | 5.37849500  | 0.54042300  | -1.07612800 |
| C | 5.88435100  | -0.93384000 | 1.78127300  |
| C | 5.50175500  | 0.53999400  | 1.51527600  |
| C | 4.74123100  | -1.94749000 | 1.55085200  |
| C | 5.76525600  | -0.92752500 | -1.36167800 |
| H | 3.08799600  | -2.47075300 | 0.31558500  |
| H | 2.35876000  | 1.27287700  | -1.18835100 |
| H | 2.40914600  | -0.38390600 | -1.77144500 |
| H | 3.93113400  | -1.94880200 | -1.86674600 |
| H | 5.10240600  | -2.96596300 | -1.05708600 |
| H | 4.36335300  | 1.85117700  | 0.26534900  |
| H | 6.29043200  | 1.15908000  | -1.13929200 |
| H | 4.73049700  | 0.89287600  | -1.89485300 |
| H | 6.24553500  | -1.02899800 | 2.81679000  |
| H | 6.74253700  | -1.20545700 | 1.15647500  |
| H | 4.93153500  | 0.90678800  | 2.38167400  |
| H | 6.42795000  | 1.14060800  | 1.48380900  |
| H | 5.17349400  | -2.96354300 | 1.55687100  |
| H | 4.06044600  | -1.90158100 | 2.41353700  |
| H | 6.05265400  | -1.02576700 | -2.41999900 |
| H | 6.66949800  | -1.17886900 | -0.79721400 |
| C | 0.77417800  | 0.06822900  | -0.52486000 |
| C | 0.01614000  | -1.07292100 | -0.31302000 |
| C | -1.33301300 | 0.69671600  | 0.09177600  |
| C | -2.53572900 | 1.52008300  | 0.32577400  |
| C | -2.45817400 | 2.81754200  | 0.87259600  |
| C | -3.81452400 | 1.03833700  | -0.02379500 |
| C | -3.60433400 | 3.58412500  | 1.06900200  |
| H | -1.50464300 | 3.23906400  | 1.14834700  |
| C | -4.95689500 | 1.80861200  | 0.17739900  |
| H | -3.92519500 | 0.05653400  | -0.45723900 |
| C | -4.86167700 | 3.08713000  | 0.72688000  |
| H | -3.50606000 | 4.57762800  | 1.49699400  |
| H | -5.92428500 | 1.40358600  | -0.10579700 |
| H | -5.75304400 | 3.68811500  | 0.88242300  |
| C | -2.32350000 | -1.56767300 | 0.49941200  |
| C | -2.59662800 | -1.67405900 | 1.88093000  |

|   |             |             |             |
|---|-------------|-------------|-------------|
| C | -3.02099800 | -2.31939800 | -0.47304100 |
| C | -3.63053800 | -2.53639400 | 2.26758700  |
| C | -4.04296800 | -3.16249900 | -0.02029900 |
| C | -4.35229200 | -3.26859200 | 1.33188800  |
| H | -3.86842300 | -2.63558600 | 3.32243500  |
| H | -4.60334000 | -3.74812200 | -0.74274500 |
| H | -5.15129900 | -3.92950200 | 1.65666100  |
| C | 0.40375100  | -2.48131900 | -0.52173400 |
| C | 0.22233700  | -3.46994700 | 0.45810700  |
| C | 0.99300200  | -2.85054100 | -1.74308300 |
| C | 0.61912000  | -4.78534500 | 0.22315500  |
| H | -0.21429900 | -3.20811200 | 1.41415600  |
| C | 1.39914100  | -4.16325100 | -1.97286700 |
| H | 1.13400100  | -2.10120600 | -2.51508900 |
| C | 1.21223300  | -5.13701500 | -0.99062000 |
| H | 0.47854500  | -5.53321000 | 0.99872100  |
| H | 1.86219600  | -4.42365500 | -2.92040300 |
| H | 1.53204600  | -6.16032100 | -1.16660900 |
| C | 0.24204000  | 2.53370100  | -0.52114600 |
| C | 0.93353800  | 3.29573900  | 0.44990000  |
| C | -0.15975100 | 3.06187400  | -1.76450600 |
| C | 1.14367100  | 4.64843300  | 0.15281500  |
| C | 0.09075900  | 4.41902500  | -2.00334700 |
| C | 0.71941500  | 5.20929300  | -1.04934900 |
| H | 1.66579900  | 5.27133100  | 0.87024900  |
| H | -0.20560500 | 4.85607500  | -2.95231000 |
| H | 0.90102400  | 6.26199300  | -1.24922600 |
| H | 2.71395700  | -0.01609000 | 1.43574200  |
| B | 3.30093900  | -0.17858000 | 0.35929700  |
| N | -0.08509800 | 1.14374100  | -0.24648700 |
| N | -1.27138100 | -0.66048100 | 0.07059000  |
| C | 1.46714600  | 2.70295000  | 1.75694600  |
| H | 1.76744900  | 1.66954400  | 1.55538800  |
| C | 2.72805300  | 3.42495000  | 2.26511600  |
| H | 3.18283700  | 2.82942300  | 3.06292500  |
| H | 3.47525300  | 3.54099300  | 1.47533500  |
| H | 2.50199500  | 4.41486000  | 2.68223400  |
| C | 0.41989700  | 2.66981800  | 2.88973200  |
| H | 0.04450500  | 3.67549100  | 3.12046200  |
| H | -0.43791900 | 2.03282500  | 2.65579000  |
| H | 0.88306900  | 2.27116400  | 3.79939200  |
| C | -0.80204500 | 2.21929300  | -2.86427400 |
| H | -0.99985600 | 1.21927400  | -2.46657300 |
| C | -2.15097900 | 2.79616300  | -3.33406000 |

|   |             |             |             |
|---|-------------|-------------|-------------|
| H | -2.60578300 | 2.13109100  | -4.07757500 |
| H | -2.85223600 | 2.90729700  | -2.50073600 |
| H | -2.02910800 | 3.77812200  | -3.80513400 |
| C | 0.17082900  | 2.04445900  | -4.04858900 |
| H | 1.11303300  | 1.59222600  | -3.72258700 |
| H | -0.27433800 | 1.39856900  | -4.81477600 |
| H | 0.40413000  | 3.00759400  | -4.51702600 |
| C | -2.72716600 | -2.26123000 | -1.97346200 |
| H | -1.84345900 | -1.63561800 | -2.12781500 |
| C | -2.40466900 | -3.66139200 | -2.53465900 |
| H | -3.28712400 | -4.31156000 | -2.51414400 |
| H | -2.08229200 | -3.57919700 | -3.57879800 |
| H | -1.60733400 | -4.14968400 | -1.96977400 |
| C | -3.88660800 | -1.63154000 | -2.77407300 |
| H | -4.08004800 | -0.59468600 | -2.48141400 |
| H | -3.64493000 | -1.63388800 | -3.84315200 |
| H | -4.81606600 | -2.19782700 | -2.64321900 |
| C | -1.83316800 | -0.90988400 | 2.96279400  |
| H | -1.04736700 | -0.31824000 | 2.48475000  |
| C | -1.13130900 | -1.85989800 | 3.95453200  |
| H | -0.57539000 | -1.27604700 | 4.69633500  |
| H | -1.85102300 | -2.48586800 | 4.49437000  |
| H | -0.41712400 | -2.52003100 | 3.45285600  |
| C | -2.75834200 | 0.06304000  | 3.72267300  |
| H | -3.26309500 | 0.75753100  | 3.04508100  |
| H | -3.52819400 | -0.47954900 | 4.28386800  |
| H | -2.17604000 | 0.64960400  | 4.44221600  |

#### mNHO-BBNformate

0 1

|   |            |             |             |
|---|------------|-------------|-------------|
| C | 3.83701200 | -1.57005200 | -0.17112800 |
| C | 2.00661600 | 0.39670100  | -1.05642300 |
| C | 4.44998900 | -1.63793800 | -1.59425400 |
| C | 4.47187200 | 0.93852000  | -0.00475100 |
| C | 5.08210800 | 0.87621000  | -1.43002900 |
| C | 5.98190700 | -0.84442900 | 1.16580800  |
| C | 5.49465900 | 0.62282900  | 1.11209100  |
| C | 4.88726900 | -1.91107400 | 0.91985200  |
| C | 5.48076600 | -0.53394800 | -1.91895500 |
| H | 3.08197000 | -2.36701900 | -0.11949000 |
| H | 2.12177900 | 1.46935700  | -1.24663800 |

|   |             |             |             |
|---|-------------|-------------|-------------|
| H | 2.19006500  | -0.10096300 | -2.01485300 |
| H | 3.63551400  | -1.58420400 | -2.33118800 |
| H | 4.92328500  | -2.61961600 | -1.75953800 |
| H | 4.16172300  | 1.98678400  | 0.14119900  |
| H | 5.96326700  | 1.53449900  | -1.50176700 |
| H | 4.34780100  | 1.29439100  | -2.13489400 |
| H | 6.45219700  | -1.03118000 | 2.14244900  |
| H | 6.78578400  | -0.97980100 | 0.43486700  |
| H | 5.03317700  | 0.88077900  | 2.07577100  |
| H | 6.37668900  | 1.27913300  | 1.02983900  |
| H | 5.38377500  | -2.86595800 | 0.68039200  |
| H | 4.35506800  | -2.09980300 | 1.86132700  |
| H | 5.64912700  | -0.50382900 | -3.00576000 |
| H | 6.44961100  | -0.80643000 | -1.48820700 |
| C | 0.59685500  | 0.15009900  | -0.65759200 |
| C | -0.07732400 | -1.03433100 | -0.44791800 |
| C | -1.53473800 | 0.63603700  | -0.00766000 |
| C | -2.80013000 | 1.36943700  | 0.21615000  |
| C | -2.82679500 | 2.71856000  | 0.62618100  |
| C | -4.04490100 | 0.74554000  | -0.01423100 |
| C | -4.03009800 | 3.39721400  | 0.80486500  |
| H | -1.91086100 | 3.25345300  | 0.80986000  |
| C | -5.24456000 | 1.42809700  | 0.16722100  |
| H | -4.08882300 | -0.28188800 | -0.33558600 |
| C | -5.24897200 | 2.75991000  | 0.57969400  |
| H | -4.00410700 | 4.43409700  | 1.12734600  |
| H | -6.17957700 | 0.90847700  | -0.02202400 |
| H | -6.18543400 | 3.29175500  | 0.72136900  |
| C | -2.32604300 | -1.70106500 | 0.46724100  |
| C | -2.46966800 | -1.83330700 | 1.86580500  |
| C | -3.05083500 | -2.48959100 | -0.45448200 |
| C | -3.43527100 | -2.73967000 | 2.32430300  |
| C | -3.99418800 | -3.38084900 | 0.07005600  |
| C | -4.19810000 | -3.49628000 | 1.44211000  |
| H | -3.57890100 | -2.85775400 | 3.39390100  |
| H | -4.57686200 | -3.99539100 | -0.60973400 |
| H | -4.94186200 | -4.19075300 | 1.82355800  |
| C | 0.39394800  | -2.41380300 | -0.68166000 |
| C | 0.39407100  | -3.39094700 | 0.32483900  |
| C | 0.87852800  | -2.75712900 | -1.95451000 |
| C | 0.86259900  | -4.67736500 | 0.06224500  |
| H | 0.04991600  | -3.13741200 | 1.32005200  |
| C | 1.35645200  | -4.04066000 | -2.21308200 |
| H | 0.88027100  | -2.01119800 | -2.74345800 |

|   |             |             |             |
|---|-------------|-------------|-------------|
| C | 1.34724200  | -5.00627200 | -1.20531100 |
| H | 0.86309700  | -5.41935100 | 0.85586900  |
| H | 1.73520800  | -4.28482800 | -3.20155900 |
| H | 1.72122400  | -6.00687000 | -1.40399100 |
| C | -0.06454500 | 2.57668800  | -0.61274600 |
| C | 0.46404500  | 3.39070000  | 0.41583500  |
| C | -0.37037000 | 3.07170900  | -1.89798800 |
| C | 0.63938200  | 4.74892200  | 0.11617000  |
| C | -0.16269700 | 4.43561700  | -2.13405500 |
| C | 0.32847100  | 5.27000000  | -1.13582000 |
| H | 1.03530800  | 5.40697600  | 0.88322200  |
| H | -0.38903100 | 4.84617700  | -3.11377900 |
| H | 0.47896300  | 6.32743800  | -1.33654800 |
| B | 3.19483100  | -0.08055100 | 0.07259100  |
| N | -0.32472700 | 1.16644500  | -0.36279800 |
| N | -1.37752600 | -0.71551100 | -0.03054100 |
| C | 0.83753200  | 2.88261800  | 1.80925700  |
| H | 0.83116200  | 1.79200700  | 1.80080500  |
| C | 2.26440200  | 3.31208000  | 2.20225700  |
| H | 2.54688700  | 2.79756700  | 3.12588200  |
| H | 2.99213700  | 3.04887200  | 1.43192000  |
| H | 2.33121800  | 4.39155400  | 2.38699600  |
| C | -0.14037100 | 3.35013400  | 2.90840400  |
| H | -0.19427100 | 4.44525600  | 2.96165100  |
| H | -1.15493500 | 2.96685200  | 2.76797300  |
| H | 0.21466100  | 2.98057500  | 3.87610000  |
| C | -0.90166700 | 2.19413800  | -3.02932500 |
| H | -1.01814600 | 1.17371300  | -2.65183300 |
| C | -2.28809300 | 2.66147900  | -3.51408100 |
| H | -2.66710000 | 1.98247800  | -4.28694700 |
| H | -3.01257700 | 2.68408200  | -2.69345700 |
| H | -2.24368500 | 3.66591100  | -3.95048100 |
| C | 0.10140200  | 2.12701800  | -4.19840000 |
| H | 1.07697900  | 1.76046900  | -3.86326700 |
| H | -0.26987000 | 1.45199700  | -4.97858700 |
| H | 0.25102500  | 3.11215700  | -4.65496000 |
| C | -2.86049800 | -2.42384600 | -1.97111800 |
| H | -2.03134700 | -1.74252300 | -2.18435500 |
| C | -2.48160400 | -3.80620500 | -2.54136200 |
| H | -3.31517100 | -4.51299900 | -2.45584400 |
| H | -2.23444200 | -3.71717600 | -3.60546000 |
| H | -1.61843300 | -4.23336900 | -2.02562900 |
| C | -4.10566100 | -1.88048900 | -2.70302500 |
| H | -4.34871100 | -0.85578000 | -2.40559500 |

|   |             |             |             |
|---|-------------|-------------|-------------|
| H | -3.93063800 | -1.87906800 | -3.78509200 |
| H | -4.98543600 | -2.50559200 | -2.51084500 |
| C | -1.62257400 | -1.06997800 | 2.88359600  |
| H | -0.81385200 | -0.54860600 | 2.36406400  |
| C | -0.93936500 | -2.01487800 | 3.89400200  |
| H | -0.19736700 | -1.44846900 | 4.46286700  |
| H | -1.66082400 | -2.45613400 | 4.59240800  |
| H | -0.41249000 | -2.83578400 | 3.39597600  |
| C | -2.45454000 | -0.01518300 | 3.64094600  |
| H | -2.93253600 | 0.69768600  | 2.96253800  |
| H | -3.24365000 | -0.49025300 | 4.23697800  |
| H | -1.80521000 | 0.54278300  | 4.32383600  |
| O | 2.36768900  | 0.05588400  | 1.38833500  |
| C | 2.53730800  | -0.18761800 | 2.65527800  |
| H | 3.52198500  | -0.58955600 | 2.94726100  |
| O | 1.67255200  | 0.01641600  | 3.50262800  |

mNHO-BBNOMe

0 1

|   |            |             |             |
|---|------------|-------------|-------------|
| C | 3.98875800 | -1.67884500 | 0.08746200  |
| C | 2.08758100 | 0.24029800  | -0.82960600 |
| C | 4.53883000 | -1.83182600 | -1.35292900 |
| C | 4.60213400 | 0.84478400  | 0.04619900  |
| C | 5.13387800 | 0.69936500  | -1.39978800 |
| C | 6.18708100 | -0.84240400 | 1.24887200  |
| C | 5.67793900 | 0.61147400  | 1.13422600  |
| C | 5.07998200 | -1.91761500 | 1.16738000  |
| C | 5.52629700 | -0.73619000 | -1.81485600 |
| H | 3.25653700 | -2.49369100 | 0.21272400  |
| H | 2.24031200 | 1.29417900  | -1.08352700 |
| H | 2.28925600 | -0.32980500 | -1.74128000 |
| H | 3.68786400 | -1.84634700 | -2.05107400 |
| H | 5.02547500 | -2.81397400 | -1.47772500 |
| H | 4.27772200 | 1.89563900  | 0.15150100  |
| H | 6.00130300 | 1.35962800  | -1.56813700 |
| H | 4.35734400 | 1.06084000  | -2.09188000 |
| H | 6.72690600 | -0.95917200 | 2.20076200  |
| H | 6.93741000 | -1.03105900 | 0.47307900  |

|   |             |             |             |
|---|-------------|-------------|-------------|
| H | 5.23030500  | 0.89590300  | 2.09469100  |
| H | 6.54567800  | 1.27660700  | 0.98382700  |
| H | 5.55799900  | -2.90142200 | 1.02110100  |
| H | 4.58441000  | -1.97072200 | 2.14567400  |
| H | 5.62791500  | -0.78147900 | -2.91005200 |
| H | 6.52440900  | -0.96407600 | -1.42752200 |
| C | 0.67121600  | 0.06579000  | -0.46729700 |
| C | -0.09745600 | -1.07410400 | -0.28003100 |
| C | -1.45848600 | 0.69825800  | 0.06431700  |
| C | -2.66856300 | 1.52384000  | 0.24759700  |
| C | -2.61155400 | 2.80755000  | 0.82692800  |
| C | -3.92838400 | 1.05940500  | -0.18382000 |
| C | -3.76142000 | 3.57884000  | 0.97762000  |
| H | -1.67081100 | 3.21354800  | 1.16326500  |
| C | -5.07473300 | 1.83477000  | -0.02923800 |
| H | -4.02100000 | 0.08825300  | -0.64523200 |
| C | -5.00100600 | 3.09959000  | 0.55452300  |
| H | -3.68048900 | 4.56161800  | 1.43304700  |
| H | -6.02774900 | 1.44488000  | -0.37539800 |
| H | -5.89552300 | 3.70416100  | 0.67398900  |
| C | -2.48708700 | -1.56008400 | 0.39630100  |
| C | -2.87529000 | -1.66501000 | 1.75035300  |
| C | -3.11343700 | -2.30159700 | -0.63187500 |
| C | -3.94143600 | -2.52299900 | 2.04970900  |
| C | -4.17291700 | -3.14006000 | -0.26499400 |
| C | -4.58900600 | -3.24998800 | 1.05776100  |
| H | -4.26546900 | -2.62113900 | 3.08141300  |
| H | -4.67917200 | -3.71753300 | -1.03249200 |
| H | -5.41497000 | -3.90728200 | 1.31548300  |
| C | 0.29772400  | -2.48550400 | -0.44833200 |
| C | 0.05029500  | -3.46107700 | 0.53144700  |
| C | 0.95838000  | -2.87484600 | -1.62587300 |
| C | 0.45117700  | -4.78201600 | 0.33775900  |
| H | -0.44684500 | -3.18532800 | 1.45352200  |
| C | 1.36731100  | -4.19346500 | -1.81440900 |
| H | 1.15034800  | -2.13815800 | -2.39849300 |
| C | 1.11403700  | -5.15335400 | -0.83349700 |
| H | 0.25637600  | -5.51922100 | 1.11182800  |
| H | 1.88523700  | -4.46842000 | -2.72873300 |
| H | 1.43542300  | -6.18114500 | -0.97746500 |
| C | 0.12507700  | 2.53475000  | -0.50830300 |
| C | 0.77813000  | 3.31779100  | 0.47204000  |
| C | -0.24619500 | 3.04273600  | -1.77042000 |
| C | 0.97541700  | 4.67069300  | 0.16528100  |



|   |             |             |             |
|---|-------------|-------------|-------------|
| C | -0.00866700 | 4.40037400  | -2.01768700 |
| C | 0.57825000  | 5.21182700  | -1.05437800 |
| H | 1.46771100  | 5.30778900  | 0.89169800  |
| H | -0.28199100 | 4.82164200  | -2.98060500 |
| H | 0.74913300  | 6.26498600  | -1.26139700 |
| B | 3.34832500  | -0.17947400 | 0.32359500  |
| N | -0.19956400 | 1.14447300  | -0.22535700 |
| N | -1.39930500 | -0.65889200 | 0.05006600  |
| C | 1.29290900  | 2.75088300  | 1.79606900  |
| H | 1.58215800  | 1.70759000  | 1.63501600  |
| C | 2.57807800  | 3.44908800  | 2.27713000  |
| H | 3.02551000  | 2.84740700  | 3.07375100  |
| H | 3.31742700  | 3.52811500  | 1.47505300  |
| H | 2.38832100  | 4.45297700  | 2.67926700  |
| C | 0.24540800  | 2.78653600  | 2.92880700  |
| H | -0.11503100 | 3.80723200  | 3.11508200  |
| H | -0.62291600 | 2.15206000  | 2.72473000  |
| H | 0.70225700  | 2.42196300  | 3.85567600  |
| C | -0.83891900 | 2.17893000  | -2.88172200 |
| H | -1.03955400 | 1.18127600  | -2.47933600 |
| C | -2.17622700 | 2.73335100  | -3.40843500 |
| H | -2.59636700 | 2.05232300  | -4.15797900 |
| H | -2.90862900 | 2.84893100  | -2.60299300 |
| H | -2.04799600 | 3.70948700  | -3.88973900 |
| C | 0.17821700  | 2.00153400  | -4.02803700 |
| H | 1.11367500  | 1.56577900  | -3.66270900 |
| H | -0.23106900 | 1.34064400  | -4.80149000 |
| H | 0.41609900  | 2.96186500  | -4.49985700 |
| C | -2.71246700 | -2.23293800 | -2.10705000 |
| H | -1.81244000 | -1.61791800 | -2.19311900 |
| C | -2.37015700 | -3.63099600 | -2.66148800 |
| H | -3.26070900 | -4.26807000 | -2.71450800 |
| H | -1.97105000 | -3.54107600 | -3.67810400 |
| H | -1.62333900 | -4.13839100 | -2.04655400 |
| C | -3.80489200 | -1.57798800 | -2.97873000 |
| H | -4.00448700 | -0.54194500 | -2.68719900 |
| H | -3.48916400 | -1.57144300 | -4.02832100 |
| H | -4.74861900 | -2.13260000 | -2.91980000 |
| C | -2.20711800 | -0.90276500 | 2.89471400  |
| H | -1.39114700 | -0.30051000 | 2.48522400  |
| C | -1.58075400 | -1.85655500 | 3.93219800  |
| H | -1.08983700 | -1.27634000 | 4.72121200  |
| H | -2.33804600 | -2.49104500 | 4.40674100  |
| H | -0.82513200 | -2.50926200 | 3.48419300  |

|   |             |             |            |
|---|-------------|-------------|------------|
| C | -3.19616400 | 0.05822600  | 3.58647800 |
| H | -3.65490300 | 0.75132900  | 2.87584100 |
| H | -4.00069200 | -0.49335200 | 4.08695100 |
| H | -2.67433200 | 0.64655400  | 4.34971600 |
| O | 2.85806800  | 0.06801000  | 1.71483700 |
| C | 2.14662500  | -0.87459700 | 2.45572900 |
| H | 2.21511800  | -1.89429400 | 2.05133000 |
| H | 2.52114700  | -0.90438900 | 3.49279100 |
| H | 1.06824800  | -0.62354400 | 2.51826800 |

### N-methyl N-formylaniline

0 1

|   |             |             |             |
|---|-------------|-------------|-------------|
| C | 2.95662800  | 0.18818900  | -0.07351500 |
| C | 2.34683500  | -1.03760700 | -0.34452700 |
| C | 0.95958900  | -1.16620900 | -0.29309100 |
| C | 0.16016600  | -0.06436200 | 0.04480900  |
| C | 0.77728800  | 1.16019000  | 0.34574000  |
| C | 2.16382900  | 1.28430200  | 0.26939300  |
| H | 4.03743900  | 0.28535200  | -0.11847800 |
| H | 2.95151200  | -1.90123900 | -0.60791300 |
| H | 0.49712200  | -2.11932300 | -0.52818800 |
| H | 0.17563500  | 2.00409700  | 0.66775100  |
| H | 2.62533200  | 2.23970600  | 0.50382300  |
| N | -1.25315600 | -0.19332000 | 0.09978500  |
| C | -2.08403300 | 0.80085600  | -0.36829800 |
| H | -1.52474200 | 1.65382400  | -0.78863800 |
| O | -3.30157300 | 0.75823000  | -0.34269100 |
| C | -1.86323100 | -1.43817500 | 0.56392700  |
| H | -1.32418400 | -1.80845200 | 1.43980400  |
| H | -2.89928700 | -1.21923300 | 0.82334500  |
| H | -1.85656800 | -2.21043700 | -0.21510000 |

### N-Methylaniline

0 1

|   |             |             |            |
|---|-------------|-------------|------------|
| N | 1.79277500  | -0.60911600 | 0.15224500 |
| C | 0.44360800  | -0.27351900 | 0.06136100 |
| C | 0.00088900  | 1.06180400  | 0.05778400 |
| C | -0.52280600 | -1.29839800 | 0.00653000 |
| C | -1.36388300 | 1.35103600  | 0.01156300 |
| H | 0.71815800  | 1.87504800  | 0.09310200 |

|   |             |             |             |
|---|-------------|-------------|-------------|
| C | -1.87844900 | -0.99587800 | -0.04422500 |
| H | -0.19596900 | -2.33673300 | 0.01059400  |
| C | -2.31473300 | 0.33294000  | -0.04090900 |
| H | -1.68122800 | 2.39110000  | 0.01131000  |
| H | -2.60159000 | -1.80670000 | -0.08744900 |
| H | -3.37455300 | 0.56664500  | -0.08041200 |
| C | 2.83569900  | 0.36447100  | -0.10896300 |
| H | 2.83839200  | 1.14123000  | 0.66446100  |
| H | 3.80400700  | -0.14140100 | -0.06904800 |
| H | 2.73959700  | 0.86136700  | -1.08870900 |
| H | 2.00181200  | -1.54148300 | -0.17841400 |

TSO

0 1

|   |             |             |             |
|---|-------------|-------------|-------------|
| C | -0.89210200 | -1.20604200 | -0.00122000 |
| C | -0.84568800 | -0.92373800 | 1.52592800  |
| C | -2.09657600 | 1.08542100  | -0.36817100 |
| C | -2.05255500 | 1.34329700  | 1.16428600  |
| C | -3.48203900 | -1.13538600 | -0.38908200 |
| C | -3.36379200 | 0.33271500  | -0.85335300 |
| C | -2.16925000 | -1.94381700 | -0.48292100 |
| C | -1.89439600 | 0.08409900  | 2.04399800  |
| H | -0.04430500 | -1.86707600 | -0.22070400 |
| H | 0.15699000  | -0.54277200 | 1.76530000  |
| H | -0.94903400 | -1.86590900 | 2.08444200  |
| H | -2.11476800 | 2.07022200  | -0.85583300 |
| H | -2.95377500 | 1.89079200  | 1.47854400  |
| H | -1.20835100 | 2.01701400  | 1.37110100  |
| H | -4.25217400 | -1.63665100 | -0.99131700 |
| H | -3.85714400 | -1.16433700 | 0.63852000  |
| H | -3.35969700 | 0.35277800  | -1.95321400 |
| H | -4.26865100 | 0.87802300  | -0.54603200 |
| H | -2.29245300 | -2.88736000 | 0.06940700  |
| H | -2.01019600 | -2.23004000 | -1.53331900 |
| H | -1.61774900 | 0.39489600  | 3.06088200  |
| H | -2.86312100 | -0.41377100 | 2.14856400  |
| B | -0.81099500 | 0.20607000  | -0.74366300 |
| N | 0.62657100  | 0.96095300  | -0.84214000 |
| C | 1.83909400  | 0.34390900  | -0.41890200 |
| C | 2.66248900  | 0.94598500  | 0.54602100  |
| C | 2.25525700  | -0.87101500 | -0.98914700 |
| C | 3.85931700  | 0.34273200  | 0.93500400  |

|   |             |             |             |
|---|-------------|-------------|-------------|
| H | 2.36244200  | 1.88404500  | 1.00238400  |
| C | 3.44461800  | -1.47500300 | -0.58621700 |
| H | 1.65266000  | -1.33403600 | -1.76483300 |
| C | 4.25594400  | -0.87258800 | 0.37741800  |
| H | 4.47937200  | 0.82702500  | 1.68507100  |
| H | 3.74538200  | -2.41449600 | -1.04256300 |
| H | 5.18674500  | -1.34124300 | 0.68373700  |
| C | 0.63305100  | 2.42447700  | -0.92660600 |
| H | 1.60720400  | 2.77405300  | -1.28295000 |
| H | -0.12903500 | 2.74957800  | -1.64075300 |
| H | 0.41646800  | 2.91035100  | 0.03381700  |
| H | -0.03815900 | 0.38852400  | -1.91607400 |
| H | -0.89989100 | -0.04690500 | -2.12309800 |

TS1

0 1

|   |            |             |             |
|---|------------|-------------|-------------|
| C | 4.31252700 | -1.86168800 | -0.93341700 |
| C | 1.99885700 | -0.39367400 | -0.95966900 |
| C | 5.63753500 | -1.43865100 | -0.23989000 |
| C | 3.05883700 | -1.71551200 | 1.34330300  |
| C | 4.36917800 | -1.20448700 | 2.01167200  |
| C | 3.88833000 | -4.04460300 | 0.43761000  |
| C | 2.91849300 | -3.27200600 | 1.36037500  |
| C | 4.08351500 | -3.40532700 | -0.95290400 |
| C | 5.67398300 | -1.61062500 | 1.29518700  |
| H | 4.36894200 | -1.52540100 | -1.97806000 |
| H | 2.52240400 | 0.59393500  | -1.13514100 |
| H | 1.95279700 | -0.77344100 | -1.99007300 |
| H | 5.80313200 | -0.38165900 | -0.47681000 |
| H | 6.48089900 | -1.98916900 | -0.68406800 |
| H | 2.21400900 | -1.31708400 | 1.92595100  |
| H | 4.40796700 | -1.54928000 | 3.05662800  |
| H | 4.32375500 | -0.10878800 | 2.05245200  |
| H | 3.51016400 | -5.06862000 | 0.31069500  |
| H | 4.86036200 | -4.15163300 | 0.92660800  |
| H | 1.89080900 | -3.52240000 | 1.06808500  |
| H | 3.03398800 | -3.63608800 | 2.39274100  |
| H | 4.92603900 | -3.89589700 | -1.46284800 |
| H | 3.19613700 | -3.61945400 | -1.56673300 |
| H | 6.49586600 | -1.00334700 | 1.69692600  |
| H | 5.92523100 | -2.64447900 | 1.55288300  |
| C | 0.59958200 | -0.20800400 | -0.47034200 |

|   |             |             |             |
|---|-------------|-------------|-------------|
| C | -0.40193000 | -1.14575500 | -0.31786200 |
| C | -1.30767500 | 0.87426500  | 0.10958800  |
| C | -2.29589200 | 1.94431800  | 0.37091100  |
| C | -1.96223000 | 3.10915600  | 1.08862500  |
| C | -3.61192800 | 1.82670400  | -0.11749600 |
| C | -2.91168100 | 4.10249100  | 1.31657200  |
| H | -0.96163100 | 3.25289200  | 1.46546200  |
| C | -4.55619300 | 2.82437200  | 0.11206400  |
| H | -3.90596000 | 0.95688400  | -0.68472200 |
| C | -4.21308400 | 3.96761600  | 0.83360900  |
| H | -2.62363900 | 4.98811900  | 1.87522200  |
| H | -5.56090200 | 2.70494300  | -0.28296200 |
| H | -4.94906800 | 4.74645700  | 1.01170400  |
| C | -2.85309600 | -1.09271000 | 0.32391700  |
| C | -3.27859300 | -1.19166700 | 1.66719100  |
| C | -3.61902000 | -1.59519600 | -0.75350600 |
| C | -4.52274600 | -1.78873200 | 1.90674900  |
| C | -4.85355400 | -2.17928000 | -0.44500300 |
| C | -5.30709800 | -2.27325200 | 0.86652500  |
| H | -4.87914500 | -1.87377100 | 2.92885500  |
| H | -5.46921700 | -2.56780800 | -1.25043500 |
| H | -6.27026700 | -2.72957500 | 1.07766300  |
| C | -0.34614800 | -2.60445100 | -0.54618000 |
| C | -0.83820500 | -3.52711700 | 0.39189200  |
| C | 0.22313900  | -3.09843800 | -1.73247100 |
| C | -0.76362200 | -4.89819000 | 0.15068200  |
| H | -1.27405400 | -3.17349900 | 1.31809200  |
| C | 0.30587000  | -4.47040000 | -1.96829400 |
| H | 0.59076900  | -2.40501300 | -2.48056300 |
| C | -0.18789400 | -5.37599300 | -1.02805300 |
| H | -1.14686500 | -5.59351600 | 0.89221700  |
| H | 0.75070500  | -4.82884200 | -2.89218900 |
| H | -0.12403600 | -6.44480100 | -1.21151100 |
| C | 0.64090200  | 2.34790100  | -0.30449700 |
| C | 1.39341200  | 2.86997600  | 0.77202400  |
| C | 0.41132700  | 3.05725400  | -1.49562000 |
| C | 1.81624700  | 4.19658800  | 0.65295500  |
| C | 0.86049400  | 4.38129700  | -1.54988000 |
| C | 1.53268100  | 4.95338400  | -0.48034000 |
| H | 2.42024700  | 4.63451200  | 1.43726600  |
| H | 0.70793100  | 4.95616300  | -2.45830300 |
| H | 1.88956800  | 5.97698400  | -0.54602400 |
| B | 3.06180400  | -1.26266000 | -0.17251500 |
| N | 0.01347100  | 1.03235700  | -0.17590300 |

|   |             |             |             |
|---|-------------|-------------|-------------|
| N | -1.57444300 | -0.45776100 | 0.03985000  |
| C | 1.80604900  | 2.04174800  | 1.99488700  |
| H | 1.98903400  | 1.02048600  | 1.64183100  |
| C | 3.12016400  | 2.54241900  | 2.62795800  |
| H | 3.49550300  | 1.78781000  | 3.32833000  |
| H | 3.88646900  | 2.74573400  | 1.87299400  |
| H | 2.95619500  | 3.46038800  | 3.20674600  |
| C | 0.72138900  | 1.95919400  | 3.08889900  |
| H | 0.48356100  | 2.95636100  | 3.48006500  |
| H | -0.21004100 | 1.50599100  | 2.73552800  |
| H | 1.08594200  | 1.35441400  | 3.92758900  |
| C | -0.19298200 | 2.42701600  | -2.74561300 |
| H | -0.47816700 | 1.39439400  | -2.51215100 |
| C | -1.46062500 | 3.15301800  | -3.23292200 |
| H | -1.86360800 | 2.65494700  | -4.12320700 |
| H | -2.24298500 | 3.17046900  | -2.46619600 |
| H | -1.24211200 | 4.19055200  | -3.51004000 |
| C | 0.87963400  | 2.36378800  | -3.85680000 |
| H | 1.83001200  | 1.98792700  | -3.46610800 |
| H | 0.53469200  | 1.72817000  | -4.68220800 |
| H | 1.07065700  | 3.36284800  | -4.26605100 |
| C | -3.18602500 | -1.53580600 | -2.22026200 |
| H | -2.16891900 | -1.13638500 | -2.26722200 |
| C | -3.16161300 | -2.94295100 | -2.85259400 |
| H | -4.17359600 | -3.35245100 | -2.95110300 |
| H | -2.72996100 | -2.89193500 | -3.85844200 |
| H | -2.56758800 | -3.64394400 | -2.26149200 |
| C | -4.08443500 | -0.60405300 | -3.06112600 |
| H | -4.04511400 | 0.43441900  | -2.71846800 |
| H | -3.75668300 | -0.61749600 | -4.10666300 |
| H | -5.13087900 | -0.92930400 | -3.03670100 |
| C | -2.46802500 | -0.68592900 | 2.86005000  |
| H | -1.52286400 | -0.27836200 | 2.49075600  |
| C | -2.11271200 | -1.82051800 | 3.84287400  |
| H | -1.51089600 | -1.42230500 | 4.66726900  |
| H | -3.01042500 | -2.27508100 | 4.27675400  |
| H | -1.53248300 | -2.61539400 | 3.36329000  |
| C | -3.20653700 | 0.44525400  | 3.60508000  |
| H | -3.46990100 | 1.26881400  | 2.93614800  |
| H | -4.12969800 | 0.07659600  | 4.06722800  |
| H | -2.57223800 | 0.84405500  | 4.40469100  |
| C | 4.25487300  | 2.23928700  | -0.72020500 |
| O | 4.75483300  | 3.30826100  | -0.33486300 |
| H | 4.44919200  | 1.33574100  | -0.05114500 |

O 3.52852800 1.98100900 -1.72434000

TS1f

0 1

C -0.20317900 0.08827300 1.31747700  
C -1.17609900 1.30096200 1.30232900  
C -0.20318800 0.08829000 -1.31747800  
C -1.17609700 1.30098700 -1.30231000  
C -1.64834600 -1.65594400 -0.00000400  
C -0.89045300 -1.30613200 -1.30147900  
C -0.89043400 -1.30615400 1.30146600  
C -1.99037900 1.47933300 0.00001000  
H 0.38970100 0.15390500 2.24083100  
H -0.57748800 2.20881100 1.46829500  
H -1.87032000 1.23850100 2.15271800  
H 0.38968900 0.15392700 -2.24083400  
H -1.87031700 1.23854900 -2.15270200  
H -0.57748000 2.20883400 -1.46825400  
H -1.86782300 -2.73202400 -0.00001200  
H -2.62493300 -1.16263700 0.00000800  
H -0.10904100 -2.06164700 -1.46537100  
H -1.57937700 -1.39531200 -2.15404700  
H -1.57934400 -1.39535600 2.15404300  
H -0.10901500 -2.06166700 1.46532900  
H -2.43846600 2.48195600 0.00002000  
H -2.83615800 0.78552100 0.00000300  
B 0.66362100 0.19233300 -0.00000200  
C 2.67341300 0.09180100 -0.00000400  
O 1.96495500 -0.91511000 -0.00001600  
H 1.51761000 1.16540600 -0.00000300  
O 3.71669800 0.63049400 0.00000800

TS2

0 1

C -1.40694100 -1.92622800 -2.39494300  
C -0.27115100 -1.43934500 0.15235700  
C -0.09161200 -2.71017000 -2.61985100  
C -1.97110200 -3.48568700 -0.41311000  
C -0.75779200 -4.39550900 -0.75270200  
C -3.17972000 -3.86133900 -2.70145000  
C -3.23268200 -3.97654800 -1.16126000

|   |             |             |             |
|---|-------------|-------------|-------------|
| C | -2.53516300 | -2.56339200 | -3.25678500 |
| C | -0.13031300 | -4.17952200 | -2.14979700 |
| H | -1.24551800 | -0.93081700 | -2.83243300 |
| H | -0.69834900 | -1.15053900 | 1.11582000  |
| H | 0.22686200  | -2.38931600 | 0.33805200  |
| H | 0.72769100  | -2.18619500 | -2.11044500 |
| H | 0.16618200  | -2.69816800 | -3.69184700 |
| H | -2.17747200 | -3.64478600 | 0.65760900  |
| H | -1.04689900 | -5.45536400 | -0.66165900 |
| H | 0.02631200  | -4.25730000 | 0.00401100  |
| H | -4.19914200 | -3.95853000 | -3.10358700 |
| H | -2.64196700 | -4.73105200 | -3.09403800 |
| H | -4.09086400 | -3.41227700 | -0.78597200 |
| H | -3.44419700 | -5.02757100 | -0.90436400 |
| H | -2.13559800 | -2.78822000 | -4.25982900 |
| H | -3.30267900 | -1.80654700 | -3.43455000 |
| H | 0.88733100  | -4.59713400 | -2.15316400 |
| H | -0.67974800 | -4.76610800 | -2.89274200 |
| C | 0.85607500  | -0.46795600 | -0.06405300 |
| C | 0.89985500  | 0.90952200  | -0.22933300 |
| C | 3.03323200  | 0.23442300  | 0.11496600  |
| C | 4.49406200  | 0.26664500  | 0.34297400  |
| C | 5.10125600  | -0.58276500 | 1.28701200  |
| C | 5.32067700  | 1.16126400  | -0.36339900 |
| C | 6.47456500  | -0.53537900 | 1.51603600  |
| H | 4.50576300  | -1.28862500 | 1.84528300  |
| C | 6.69321300  | 1.20685300  | -0.12983900 |
| H | 4.89873100  | 1.82281000  | -1.10476900 |
| C | 7.27952900  | 0.36008400  | 0.81124700  |
| H | 6.91180000  | -1.20222000 | 2.25348900  |
| H | 7.30403900  | 1.90460600  | -0.69529000 |
| H | 8.35023100  | 0.39552400  | 0.99093300  |
| C | 2.72115800  | 2.68783600  | -0.15222500 |
| C | 3.07698900  | 3.32244200  | 1.05910100  |
| C | 2.81282100  | 3.33315400  | -1.40560800 |
| C | 3.54814400  | 4.63874400  | 0.97881400  |
| C | 3.29912500  | 4.64615500  | -1.41613300 |
| C | 3.66386600  | 5.29527400  | -0.24131800 |
| H | 3.82908000  | 5.15580900  | 1.89139500  |
| H | 3.38746000  | 5.16895600  | -2.36342500 |
| H | 4.03495800  | 6.31591400  | -0.27667800 |
| C | -0.15259500 | 1.89919000  | -0.54867800 |
| C | -0.27422500 | 3.10243000  | 0.17009800  |
| C | -1.00338800 | 1.68678100  | -1.64142000 |



|   |             |             |             |
|---|-------------|-------------|-------------|
| C | -1.18104600 | 4.08160800  | -0.22528600 |
| H | 0.34258000  | 3.27702500  | 1.04094600  |
| C | -1.91093400 | 2.66838800  | -2.03972100 |
| H | -0.95453400 | 0.75415100  | -2.18561400 |
| C | -1.99017000 | 3.87537100  | -1.34540800 |
| H | -1.25621000 | 5.00381400  | 0.34447500  |
| H | -2.56815600 | 2.46273100  | -2.87644400 |
| H | -2.69062600 | 4.64381300  | -1.66206300 |
| C | 2.72006600  | -2.21880000 | 0.28788100  |
| C | 2.51396500  | -2.88756600 | 1.52043800  |
| C | 3.45377200  | -2.80984800 | -0.77186700 |
| C | 3.05426200  | -4.17165000 | 1.65996000  |
| C | 3.95544100  | -4.10211700 | -0.56482800 |
| C | 3.76290000  | -4.78004600 | 0.63104500  |
| H | 2.91230900  | -4.70417700 | 2.59463100  |
| H | 4.51764000  | -4.57948500 | -1.36100100 |
| H | 4.16631400  | -5.78023900 | 0.76294100  |
| B | -1.67417800 | -1.88597500 | -0.76362600 |
| N | 2.21701300  | -0.85490700 | 0.13524000  |
| N | 2.24732000  | 1.31236500  | -0.10891100 |
| C | 1.76134100  | -2.29608400 | 2.71693900  |
| H | 1.24533100  | -1.38988600 | 2.39199200  |
| C | 0.69097600  | -3.27204200 | 3.24638500  |
| H | 0.07892300  | -2.77678400 | 4.00627300  |
| H | 0.02693500  | -3.61681200 | 2.44992200  |
| H | 1.14516500  | -4.15241000 | 3.71510700  |
| C | 2.70753900  | -1.90167200 | 3.87181400  |
| H | 3.29974600  | -2.75899800 | 4.21318900  |
| H | 3.40119200  | -1.10191100 | 3.59308500  |
| H | 2.11962100  | -1.54296200 | 4.72429400  |
| C | 3.80463000  | -2.13059600 | -2.09973700 |
| H | 3.29843000  | -1.16039400 | -2.14286300 |
| C | 5.32804200  | -1.89297800 | -2.21653800 |
| H | 5.54573000  | -1.30873000 | -3.11844800 |
| H | 5.74406500  | -1.36486100 | -1.35788400 |
| H | 5.85796900  | -2.84800800 | -2.31032200 |
| C | 3.35146900  | -2.94313800 | -3.32968400 |
| H | 2.28384000  | -3.15543900 | -3.31628800 |
| H | 3.57668100  | -2.37891300 | -4.24227800 |
| H | 3.88946900  | -3.89559400 | -3.39644300 |
| C | 2.42426600  | 2.68018000  | -2.73389700 |
| H | 1.92786200  | 1.72960400  | -2.52100500 |
| C | 1.42444200  | 3.55026800  | -3.52156900 |
| H | 1.89346200  | 4.47274000  | -3.88362200 |

|   |             |             |             |
|---|-------------|-------------|-------------|
| H | 1.06551200  | 2.99959500  | -4.39801900 |
| H | 0.55820500  | 3.82051600  | -2.91384800 |
| C | 3.65507500  | 2.37394600  | -3.61369300 |
| H | 4.33943600  | 1.66085400  | -3.14230800 |
| H | 3.33167800  | 1.93922700  | -4.56618900 |
| H | 4.22072000  | 3.28583900  | -3.83877900 |
| C | 2.98912400  | 2.66103700  | 2.43672700  |
| H | 2.63241900  | 1.63425400  | 2.30952200  |
| C | 1.98774500  | 3.37514100  | 3.36881900  |
| H | 1.97648900  | 2.88182000  | 4.34727400  |
| H | 2.26579700  | 4.42307500  | 3.52845000  |
| H | 0.96641000  | 3.35231200  | 2.97817200  |
| C | 4.37275800  | 2.59489700  | 3.11741200  |
| H | 5.11948800  | 2.11121100  | 2.48277400  |
| H | 4.73934100  | 3.59782400  | 3.36503000  |
| H | 4.30188900  | 2.03123300  | 4.05477700  |
| O | -2.86878100 | -0.94176100 | -0.31818800 |
| C | -4.16866300 | -0.53871700 | -1.50863100 |
| H | -4.36159100 | -1.56827700 | -1.81581200 |
| O | -3.89216700 | 0.34465100  | -2.29690700 |
| C | -3.32296600 | 0.88236800  | 1.63347300  |
| C | -4.48741500 | 1.36345600  | 2.54403600  |
| C | -4.01520300 | -1.57476800 | 2.06242800  |
| C | -5.17021800 | -1.09322100 | 2.98363500  |
| C | -2.03624400 | -0.51726600 | 3.43526200  |
| C | -2.71219900 | -1.79403700 | 2.88272500  |
| C | -2.02920400 | 0.68802700  | 2.46731000  |
| C | -5.01388500 | 0.32914100  | 3.56029500  |
| H | -3.10193100 | 1.70241100  | 0.93878300  |
| H | -5.32365600 | 1.68232400  | 1.91621300  |
| H | -4.17317200 | 2.26576100  | 3.09359900  |
| H | -4.29610700 | -2.57108300 | 1.68927200  |
| H | -5.29674700 | -1.80256800 | 3.81733500  |
| H | -6.11698200 | -1.12997100 | 2.43212800  |
| H | -0.99918400 | -0.75499000 | 3.71741000  |
| H | -2.51952600 | -0.22690100 | 4.37233800  |
| H | -2.00161500 | -2.32600300 | 2.24441700  |
| H | -2.91684500 | -2.47363000 | 3.72597000  |
| H | -1.82532200 | 1.60204900  | 3.04974000  |
| H | -1.18749800 | 0.59499200  | 1.77458100  |
| H | -5.98804800 | 0.66772200  | 3.94169400  |
| H | -4.36092900 | 0.30043100  | 4.43787400  |
| B | -3.68143100 | -0.51417700 | 0.86949300  |
| N | -5.13946500 | -0.27754500 | -0.26706400 |

|   |             |             |             |
|---|-------------|-------------|-------------|
| C | -5.87719100 | 0.97425200  | -0.38690100 |
| C | -7.26952700 | 1.03643200  | -0.21604000 |
| C | -5.19628600 | 2.16341700  | -0.69091800 |
| C | -7.95267900 | 2.24949600  | -0.32692600 |
| H | -7.84837900 | 0.15165400  | 0.01277700  |
| C | -5.88659600 | 3.36710500  | -0.80722800 |
| H | -4.13060700 | 2.14217500  | -0.83849400 |
| C | -7.26858400 | 3.42464600  | -0.62517500 |
| H | -9.02958400 | 2.26291200  | -0.17940000 |
| H | -5.32938400 | 4.27141900  | -1.03946800 |
| H | -7.80111300 | 4.36792500  | -0.71252700 |
| C | -6.05162200 | -1.44698400 | -0.23252700 |
| H | -6.65872000 | -1.48743600 | -1.14473300 |
| H | -5.45971400 | -2.35405800 | -0.15630600 |
| H | -6.70732000 | -1.40513900 | 0.63367500  |

#### TS4Me

0 1

|   |             |            |             |
|---|-------------|------------|-------------|
| C | 1.69417900  | 1.83033600 | -2.55732100 |
| C | 0.27400400  | 1.47174000 | -0.10850500 |
| C | 0.43803700  | 2.66207700 | -2.91382000 |
| C | 2.13869000  | 3.32671000 | -0.50175400 |
| C | 1.04063400  | 4.32425600 | -0.98574300 |
| C | 3.59130500  | 3.68809500 | -2.60816200 |
| C | 3.51798800  | 3.72408400 | -1.06899200 |
| C | 2.94131700  | 2.44448100 | -3.26702000 |
| C | 0.51270300  | 4.12687200 | -2.43077700 |
| H | 1.55735000  | 0.84098400 | -3.01904600 |
| H | 0.61291800  | 1.33187900 | 0.92557700  |
| H | -0.20187900 | 2.45205200 | -0.10031400 |
| H | -0.44993100 | 2.17419700 | -2.48605200 |
| H | 0.27802400  | 2.67050300 | -4.00539100 |
| H | 2.20486500  | 3.46825400 | 0.58988300  |
| H | 1.41714000  | 5.35608300 | -0.89750300 |
| H | 0.18233500  | 4.28805900 | -0.29993500 |
| H | 4.64444700  | 3.73116200 | -2.91483200 |
| H | 3.13306900  | 4.60195800 | -3.00616500 |
| H | 4.27614100  | 3.05017200 | -0.66384000 |
| H | 3.78589300  | 4.74063400 | -0.73467400 |
| H | 2.66482800  | 2.70391900 | -4.30358400 |
| H | 3.71540000  | 1.68163200 | -3.35618000 |
| H | -0.47861600 | 4.59768500 | -2.51840500 |

|   |             |             |             |
|---|-------------|-------------|-------------|
| H | 1.15065800  | 4.67773500  | -3.12830800 |
| C | -0.88716700 | 0.52355700  | -0.23013700 |
| C | -1.04145200 | -0.81396200 | -0.54617800 |
| C | -3.02173400 | -0.12779200 | 0.30816400  |
| C | -4.40233100 | -0.13087400 | 0.83612100  |
| C | -4.75416600 | 0.69699100  | 1.91778500  |
| C | -5.39857000 | -0.96851700 | 0.29936800  |
| C | -6.04521400 | 0.68925500  | 2.43930400  |
| H | -4.01836400 | 1.35080500  | 2.35796400  |
| C | -6.68871500 | -0.97522700 | 0.82468600  |
| H | -5.17509000 | -1.61789800 | -0.53266600 |
| C | -7.02114700 | -0.14707700 | 1.89696000  |
| H | -6.28238200 | 1.33868800  | 3.27686800  |
| H | -7.43588700 | -1.62984300 | 0.38552700  |
| H | -8.02809300 | -0.15315300 | 2.30423700  |
| C | -2.85734500 | -2.56368800 | -0.18867100 |
| C | -2.87761900 | -3.27379400 | 1.03254300  |
| C | -3.31469600 | -3.12520400 | -1.40229100 |
| C | -3.40232600 | -4.57235800 | 1.01242200  |
| C | -3.83080400 | -4.42592000 | -1.35209300 |
| C | -3.88023300 | -5.14333800 | -0.16138800 |
| H | -3.43553100 | -5.14274900 | 1.93570500  |
| H | -4.19724800 | -4.88414400 | -2.26551700 |
| H | -4.28612300 | -6.15117900 | -0.15035200 |
| C | -0.17422300 | -1.74648800 | -1.30063000 |
| C | 0.16180200  | -3.02422900 | -0.82488100 |
| C | 0.23835500  | -1.38292700 | -2.59227700 |
| C | 0.88052200  | -3.91417500 | -1.62289400 |
| H | -0.13788300 | -3.32617500 | 0.17078300  |
| C | 0.97570900  | -2.26513000 | -3.38224900 |
| H | -0.03148800 | -0.40764700 | -2.97797700 |
| C | 1.29033600  | -3.53826500 | -2.90422400 |
| H | 1.12792700  | -4.89904400 | -1.23655800 |
| H | 1.29153000  | -1.95748800 | -4.37496200 |
| H | 1.85394900  | -4.23132900 | -3.52287500 |
| C | -2.62185500 | 2.31373400  | 0.42126400  |
| C | -2.30697300 | 3.05034300  | 1.58773800  |
| C | -3.42103000 | 2.85872600  | -0.61425300 |
| C | -2.85869500 | 4.33232600  | 1.70919700  |
| C | -3.92958700 | 4.15060200  | -0.43152100 |
| C | -3.66560100 | 4.87987500  | 0.71996300  |
| H | -2.64071400 | 4.91509900  | 2.59826700  |
| H | -4.54537400 | 4.58885500  | -1.21059300 |
| H | -4.07704500 | 5.87807300  | 0.84138700  |

|   |             |             |             |
|---|-------------|-------------|-------------|
| B | 1.76761300  | 1.75841900  | -0.90837000 |
| N | -2.16664200 | 0.92966600  | 0.26725900  |
| N | -2.35418000 | -1.19734700 | -0.18285600 |
| C | -1.39192900 | 2.56530900  | 2.71491200  |
| H | -0.96355600 | 1.60149200  | 2.42718200  |
| C | -0.22841100 | 3.55867800  | 2.92207000  |
| H | 0.46710900  | 3.17311800  | 3.67271900  |
| H | 0.32994900  | 3.72736700  | 1.99862300  |
| H | -0.59341700 | 4.52792700  | 3.27966000  |
| C | -2.13301200 | 2.36419500  | 4.05435900  |
| H | -2.62361300 | 3.28707700  | 4.38483300  |
| H | -2.89281900 | 1.57757400  | 4.00574300  |
| H | -1.41511500 | 2.07467400  | 4.82967800  |
| C | -3.78081300 | 2.13803000  | -1.91520000 |
| H | -3.27526100 | 1.16678400  | -1.93279300 |
| C | -5.30062500 | 1.88966300  | -2.02307400 |
| H | -5.52300500 | 1.30962800  | -2.92648600 |
| H | -5.69660400 | 1.34762800  | -1.16085800 |
| H | -5.84568300 | 2.83735900  | -2.10059000 |
| C | -3.30176700 | 2.91933800  | -3.15584600 |
| H | -2.23041400 | 3.12407600  | -3.12080000 |
| H | -3.51011000 | 2.33906800  | -4.06242200 |
| H | -3.82795800 | 3.87581800  | -3.25133500 |
| C | -3.28085800 | -2.40201900 | -2.75028300 |
| H | -2.73329000 | -1.46336300 | -2.62461000 |
| C | -2.53475800 | -3.23477900 | -3.81247900 |
| H | -3.10552500 | -4.12857800 | -4.09019200 |
| H | -2.39606200 | -2.63972600 | -4.72193700 |
| H | -1.55151000 | -3.55360500 | -3.46083100 |
| C | -4.69195400 | -2.05331900 | -3.26973600 |
| H | -5.22380800 | -1.36095300 | -2.61030800 |
| H | -4.61712100 | -1.57793200 | -4.25440400 |
| H | -5.30771300 | -2.95332400 | -3.38235600 |
| C | -2.37199300 | -2.70940300 | 2.36114800  |
| H | -1.97854500 | -1.70285100 | 2.18911900  |
| C | -1.21610800 | -3.54923200 | 2.94243300  |
| H | -0.86895400 | -3.10317300 | 3.88056500  |
| H | -1.53323100 | -4.57584600 | 3.15826900  |
| H | -0.35791900 | -3.59498500 | 2.26550400  |
| C | -3.51098800 | -2.59884400 | 3.39649600  |
| H | -4.35075500 | -2.00823300 | 3.02075100  |
| H | -3.89210600 | -3.58922500 | 3.67145100  |
| H | -3.13946000 | -2.12327600 | 4.31129400  |
| O | 2.83170500  | 0.69722300  | -0.37972000 |

|   |            |             |             |
|---|------------|-------------|-------------|
| C | 4.21489800 | 0.28915800  | -1.39244300 |
| C | 2.54502000 | -1.19399900 | 1.63896200  |
| C | 3.54516500 | -2.09672200 | 2.41871700  |
| C | 4.14959400 | 0.80815800  | 1.95929400  |
| C | 5.03851700 | -0.03026900 | 2.92143100  |
| C | 2.05165200 | 0.60419200  | 3.48410000  |
| C | 3.02807100 | 1.54130100  | 2.74685100  |
| C | 1.52290000 | -0.56385300 | 2.62114400  |
| C | 4.43328600 | -1.35793500 | 3.43991400  |
| H | 1.96125300 | -1.85805300 | 0.98589900  |
| H | 4.20359500 | -2.61546800 | 1.71224200  |
| H | 2.99298600 | -2.89263300 | 2.94559600  |
| H | 4.78380200 | 1.59698300  | 1.53033000  |
| H | 5.32223900 | 0.58629400  | 3.78985400  |
| H | 5.97678300 | -0.26474100 | 2.41391500  |
| H | 1.19742300 | 1.18388400  | 3.86124800  |
| H | 2.53867800 | 0.21144300  | 4.38088300  |
| H | 2.46808300 | 2.17317100  | 2.05056700  |
| H | 3.47589100 | 2.22748700  | 3.48309600  |
| H | 1.12446500 | -1.34435200 | 3.29155700  |
| H | 0.66003300 | -0.21577100 | 2.04124000  |
| H | 5.25115700 | -2.02611100 | 3.74463200  |
| H | 3.85657000 | -1.18176100 | 4.35336500  |
| B | 3.40123600 | -0.06636300 | 0.80869000  |
| N | 4.46790700 | -0.90685100 | -0.33992900 |
| C | 3.74963500 | -2.06322900 | -0.92438800 |
| C | 5.88481500 | -1.18353800 | -0.12360100 |
| C | 6.39118300 | -2.49112200 | -0.18314500 |
| C | 6.78440000 | -0.13507400 | 0.13595500  |
| C | 7.75051700 | -2.74520200 | 0.01311400  |
| H | 5.73958600 | -3.33370900 | -0.37584600 |
| C | 8.14127700 | -0.39705400 | 0.31399200  |
| H | 6.42149100 | 0.87907200  | 0.17698600  |
| C | 8.63718100 | -1.70020400 | 0.25703600  |
| H | 8.10800200 | -3.77090500 | -0.03124700 |
| H | 8.81450700 | 0.43449400  | 0.50544000  |
| H | 9.69595100 | -1.89635100 | 0.40380200  |
| H | 2.74192500 | -1.73802800 | -1.16343100 |
| H | 4.24966400 | -2.39401100 | -1.84137800 |
| H | 3.68921200 | -2.89517200 | -0.22511800 |
| O | 5.07771100 | 1.13248400  | -1.54552800 |
| H | 3.64523900 | -0.13819800 | -2.22933300 |

TS2f

0 1

|   |             |             |             |
|---|-------------|-------------|-------------|
| C | 2.92361800  | -1.75027000 | 0.48282000  |
| C | 3.53302900  | -2.26733300 | -0.85557700 |
| C | 3.07790300  | 0.70443300  | -0.39471400 |
| C | 3.68084300  | 0.16428600  | -1.73154300 |
| C | 4.87937800  | -0.19609300 | 1.28035500  |
| C | 4.13358200  | 1.02388800  | 0.70262400  |
| C | 3.96735800  | -1.40118700 | 1.58484100  |
| C | 4.34414000  | -1.22656100 | -1.65477500 |
| H | 2.31075600  | -2.56934800 | 0.87404200  |
| H | 2.69752100  | -2.62422000 | -1.47322100 |
| H | 4.16282900  | -3.14698100 | -0.65797200 |
| H | 2.57267100  | 1.64146300  | -0.63823200 |
| H | 4.40562200  | 0.89329700  | -2.12224300 |
| H | 2.86797900  | 0.12497200  | -2.47140000 |
| H | 5.39213700  | 0.10446300  | 2.20394400  |
| H | 5.67417000  | -0.50130200 | 0.59375700  |
| H | 3.61528700  | 1.54083000  | 1.52426400  |
| H | 4.86558400  | 1.74555600  | 0.31181300  |
| H | 4.58953900  | -2.28336500 | 1.79493500  |
| H | 3.41638500  | -1.19753900 | 2.51605000  |
| H | 4.49442000  | -1.60232200 | -2.67568000 |
| H | 5.34789400  | -1.13303700 | -1.22986700 |
| B | 2.11715500  | -0.43016500 | 0.13358500  |
| O | 0.73296000  | -0.34265000 | 0.24155300  |
| C | -0.01016000 | -1.70417800 | 0.48827400  |
| H | 0.20760800  | -1.99036600 | 1.52399300  |
| O | -0.09506200 | -2.46270800 | -0.44264800 |
| C | -1.13858100 | 1.14336600  | -1.23010700 |
| C | -2.51654600 | 1.87157900  | -1.19016600 |
| C | -0.63006900 | 1.96729600  | 1.18069900  |
| C | -2.04432900 | 2.62271300  | 1.23870400  |
| C | 0.38478100  | 3.24526900  | -0.87732600 |
| C | 0.45003000  | 2.93584300  | 0.63735400  |
| C | -0.00673600 | 2.05036900  | -1.77601200 |
| C | -2.64635700 | 2.98872400  | -0.13263600 |
| H | -1.24116300 | 0.31771200  | -1.94400900 |
| H | -3.29767000 | 1.12554700  | -1.00585000 |
| H | -2.73284600 | 2.29193000  | -2.18353600 |
| H | -0.34542500 | 1.74419100  | 2.21857300  |
| H | -2.00493200 | 3.52337200  | 1.86905800  |
| H | -2.73760100 | 1.93634200  | 1.74584200  |
| H | 1.36075600  | 3.63206700  | -1.20261300 |

|   |             |             |             |
|---|-------------|-------------|-------------|
| H | -0.31581100 | 4.06764800  | -1.04949700 |
| H | 1.42879900  | 2.50359600  | 0.87418600  |
| H | 0.40804200  | 3.88447100  | 1.19368600  |
| H | -0.29215400 | 2.43646700  | -2.76583400 |
| H | 0.87375900  | 1.42107800  | -1.94896400 |
| H | -3.70940100 | 3.23223100  | -0.00046000 |
| H | -2.18260500 | 3.90906800  | -0.49903200 |
| B | -0.78086900 | 0.66412800  | 0.25524300  |
| N | -1.51402100 | -0.59152900 | 0.88754900  |
| C | -2.74478200 | -1.10452700 | 0.31511000  |
| C | -3.94213700 | -1.10053300 | 1.04966400  |
| C | -2.75980300 | -1.63472500 | -0.98545200 |
| C | -5.12114000 | -1.59972300 | 0.49571900  |
| H | -3.97506400 | -0.69448900 | 2.05357700  |
| C | -3.94284000 | -2.13539200 | -1.52781200 |
| H | -1.84679300 | -1.68444600 | -1.55816400 |
| C | -5.13052400 | -2.12036500 | -0.79707000 |
| H | -6.03460400 | -1.57525600 | 1.08405000  |
| H | -3.92711300 | -2.54521200 | -2.53416600 |
| H | -6.04883700 | -2.50946900 | -1.22779300 |
| C | -1.51860100 | -0.60501400 | 2.36630400  |
| H | -1.85396100 | -1.58241000 | 2.72653300  |
| H | -0.50423600 | -0.42467500 | 2.72652600  |
| H | -2.16034800 | 0.17069300  | 2.78981800  |

## TS2fl

0 1

|   |            |             |             |
|---|------------|-------------|-------------|
| C | 3.22174900 | 0.26812300  | -0.93903000 |
| C | 4.15552900 | 0.97667600  | 0.07218300  |
| C | 2.94079400 | -1.70158500 | 0.74987100  |
| C | 3.93627900 | -1.01602500 | 1.71937100  |
| C | 4.53692700 | -1.97481800 | -1.30755800 |
| C | 3.61769500 | -2.66295500 | -0.27468900 |
| C | 3.93937700 | -0.69394100 | -1.93386700 |
| C | 4.85886900 | 0.04752000  | 1.08318300  |
| H | 2.75397600 | 1.04964200  | -1.55115700 |
| H | 3.55079600 | 1.70999100  | 0.62751000  |
| H | 4.91907500 | 1.56531000  | -0.45876200 |
| H | 2.27406100 | -2.33635300 | 1.35629800  |
| H | 4.55813100 | -1.77170500 | 2.22367500  |
| H | 3.35931800 | -0.53325200 | 2.52125300  |
| H | 4.76293200 | -2.68961400 | -2.11085300 |



|   |             |             |             |
|---|-------------|-------------|-------------|
| H | 5.50199500  | -1.74637600 | -0.84467500 |
| H | 2.81611700  | -3.18679600 | -0.81270300 |
| H | 4.19024700  | -3.43753800 | 0.25759100  |
| H | 4.73070400  | -0.15513000 | -2.47686400 |
| H | 3.19931800  | -0.99053200 | -2.69014700 |
| H | 5.30208400  | 0.65738100  | 1.88295500  |
| H | 5.70549700  | -0.44491100 | 0.59558000  |
| B | 2.16474700  | -0.64519700 | -0.17730900 |
| N | 0.76285300  | 0.24349900  | 0.76050500  |
| C | 0.47935400  | 1.59521300  | 0.29811700  |
| C | 0.37655800  | 2.66578800  | 1.19681300  |
| C | 0.32231100  | 1.85124000  | -1.07518400 |
| C | 0.13086300  | 3.96121800  | 0.73339100  |
| H | 0.48644600  | 2.51554900  | 2.26321800  |
| C | 0.06843700  | 3.14442100  | -1.52426100 |
| H | 0.39375100  | 1.03851100  | -1.78476100 |
| C | -0.02683700 | 4.20973900  | -0.62682200 |
| H | 0.06145800  | 4.77349000  | 1.45181000  |
| H | -0.05145800 | 3.31668300  | -2.59040600 |
| H | -0.22047400 | 5.21689000  | -0.98469100 |
| C | 0.65216400  | 0.06685700  | 2.22045500  |
| H | -0.34768400 | 0.33687200  | 2.58282200  |
| H | 0.85593400  | -0.97572600 | 2.46326200  |
| H | 1.39622200  | 0.68020600  | 2.72927900  |
| C | 0.04030300  | -0.88895500 | -0.02611900 |
| H | -0.10940200 | -1.69333800 | 0.71078300  |
| O | 0.99999700  | -1.16068000 | -0.95315400 |
| C | -3.41243900 | -1.85010600 | -0.68750500 |
| C | -4.06037100 | -2.44909100 | 0.59626400  |
| C | -3.30032400 | 0.49211100  | 0.48480800  |
| C | -3.94599700 | -0.13051200 | 1.75858500  |
| C | -5.19964300 | -0.01524200 | -1.25450600 |
| C | -4.32336100 | 1.04759500  | -0.55449700 |
| C | -4.43261000 | -1.27371100 | -1.71834300 |
| C | -4.75138600 | -1.42762500 | 1.52609400  |
| H | -2.84991200 | -2.64908900 | -1.18843800 |
| H | -3.26818500 | -2.96054000 | 1.16405700  |
| H | -4.78051500 | -3.23371700 | 0.32150200  |
| H | -2.66487500 | 1.32962800  | 0.80081300  |
| H | -4.58901500 | 0.61176000  | 2.25395700  |
| H | -3.13708400 | -0.34532100 | 2.47477900  |
| H | -5.68045600 | 0.44537400  | -2.12790700 |
| H | -6.02121700 | -0.30770800 | -0.59421100 |
| H | -3.75148100 | 1.59370300  | -1.31859900 |

|   |             |             |             |
|---|-------------|-------------|-------------|
| H | -4.97271100 | 1.79505200  | -0.07531400 |
| H | -5.15355300 | -2.05342000 | -2.00508700 |
| H | -3.87551100 | -1.02939400 | -2.63447300 |
| H | -4.94145300 | -1.90492700 | 2.49686700  |
| H | -5.73928500 | -1.17848100 | 1.12864400  |
| B | -2.49707400 | -0.64588600 | -0.25029500 |
| O | -1.16094400 | -0.55342700 | -0.58980200 |

## TS2fII

0 1

|   |             |             |             |
|---|-------------|-------------|-------------|
| C | 2.85419000  | -0.97430000 | 1.22604300  |
| C | 3.74492900  | -2.23615700 | 1.00468600  |
| C | 2.69998300  | -0.64329600 | -1.36330500 |
| C | 3.59742000  | -1.90224900 | -1.57104600 |
| C | 4.33845000  | 0.82749700  | 0.04828500  |
| C | 3.48583800  | 0.68336400  | -1.23322600 |
| C | 3.64710700  | 0.34867300  | 1.34566600  |
| C | 4.47457800  | -2.29158000 | -0.35789100 |
| H | 2.31359700  | -1.12802100 | 2.17254600  |
| H | 3.09607300  | -3.11888800 | 1.08987800  |
| H | 4.48635200  | -2.32233300 | 1.81331800  |
| H | 2.05478800  | -0.56534400 | -2.25277400 |
| H | 4.24277000  | -1.76638800 | -2.45192800 |
| H | 2.93230100  | -2.74474400 | -1.80495700 |
| H | 4.62421400  | 1.88202800  | 0.16676700  |
| H | 5.28207700  | 0.28866300  | -0.08075300 |
| H | 2.75892700  | 1.50654500  | -1.26301200 |
| H | 4.13627300  | 0.83153500  | -2.10888600 |
| H | 4.40394300  | 0.27028400  | 2.14128000  |
| H | 2.94761500  | 1.12708500  | 1.68098900  |
| H | 4.85778500  | -3.30973600 | -0.51192000 |
| H | 5.36149300  | -1.65150000 | -0.32530300 |
| B | 1.88777900  | -0.96946400 | -0.03404900 |
| N | -1.31283000 | -1.79127300 | 0.58863900  |
| C | -2.65997200 | -1.81440800 | 0.14771600  |
| C | -2.98582600 | -2.22765200 | -1.15669100 |
| C | -3.70264200 | -1.47494800 | 1.02464400  |
| C | -4.31362500 | -2.25669600 | -1.57697200 |
| H | -2.20510300 | -2.56109700 | -1.83294200 |
| C | -5.03052600 | -1.52803300 | 0.59981400  |
| H | -3.47873200 | -1.15971500 | 2.03795000  |

|   |             |             |             |
|---|-------------|-------------|-------------|
| C | -5.34612700 | -1.90852600 | -0.70381200 |
| H | -4.54099000 | -2.57972100 | -2.58934800 |
| H | -5.82020300 | -1.25993200 | 1.29664200  |
| H | -6.38057300 | -1.94500500 | -1.03237000 |
| C | -1.01197400 | -1.99683100 | 2.00383700  |
| H | -1.64199400 | -2.79958900 | 2.39572000  |
| H | 0.03350900  | -2.29178100 | 2.08890900  |
| H | -1.17621800 | -1.09067900 | 2.60204200  |
| C | -0.27702400 | -1.40079800 | -0.25092700 |
| H | -0.62822800 | -1.25601300 | -1.27403400 |
| O | 0.88761500  | -2.06086300 | -0.08924800 |
| C | 0.56588400  | 2.62347100  | 0.37003500  |
| C | 0.54358500  | 3.58020100  | -0.85662200 |
| C | -1.69647000 | 1.56992900  | -0.41934500 |
| C | -1.66697900 | 2.50053200  | -1.66838800 |
| C | -1.68026200 | 3.37060200  | 1.49296000  |
| C | -2.40879000 | 2.18390400  | 0.82404800  |
| C | -0.15484600 | 3.18281900  | 1.63520000  |
| C | -0.83783400 | 3.79180600  | -1.51307200 |
| H | 1.61470200  | 2.45824100  | 0.64078500  |
| H | 1.22767500  | 3.16739100  | -1.61199600 |
| H | 0.96486600  | 4.55655200  | -0.57521600 |
| H | -2.26073600 | 0.67380500  | -0.70068500 |
| H | -2.69530400 | 2.76241800  | -1.95741500 |
| H | -1.25997600 | 1.91993600  | -2.51020100 |
| H | -2.11196700 | 3.53372000  | 2.48974900  |
| H | -1.88459400 | 4.28967500  | 0.93645100  |
| H | -2.52722300 | 1.38093500  | 1.56628400  |
| H | -3.43000800 | 2.48937800  | 0.55335900  |
| H | 0.30173200  | 4.13929700  | 1.92901800  |
| H | 0.04159800  | 2.49003000  | 2.46725300  |
| H | -0.69336400 | 4.24136400  | -2.50464600 |
| H | -1.41135600 | 4.52851200  | -0.94300400 |
| B | -0.19673300 | 1.29221900  | -0.00316000 |
| O | 0.37794200  | 0.04764800  | 0.09152300  |

TS2flint

0 1

|   |             |             |             |
|---|-------------|-------------|-------------|
| C | -2.56022400 | 0.16995900  | 1.01761000  |
| C | -3.65161500 | 1.26044900  | 1.23469200  |
| C | -3.85528600 | -0.65364600 | -1.10588300 |
| C | -4.93546600 | 0.44132000  | -0.86809600 |

|   |             |             |             |
|---|-------------|-------------|-------------|
| C | -4.06972200 | -1.97503800 | 1.14421800  |
| C | -4.14176100 | -2.01026700 | -0.39832000 |
| C | -2.86212800 | -1.19378900 | 1.70799400  |
| C | -5.02082600 | 0.97739900  | 0.57801500  |
| H | -1.62609600 | 0.55115500  | 1.43928000  |
| H | -3.25457300 | 2.20472100  | 0.83401600  |
| H | -3.79827700 | 1.43082100  | 2.31178600  |
| H | -3.80389200 | -0.84467400 | -2.18644200 |
| H | -5.92469300 | 0.07089300  | -1.17641600 |
| H | -4.71003400 | 1.28270700  | -1.54100500 |
| H | -4.03098000 | -3.00642200 | 1.52060000  |
| H | -4.99749300 | -1.55642500 | 1.54540900  |
| H | -3.40462800 | -2.73916300 | -0.76718700 |
| H | -5.12466300 | -2.39739700 | -0.70633600 |
| H | -3.00512600 | -1.04106200 | 2.78821700  |
| H | -1.96142600 | -1.81771300 | 1.61056200  |
| H | -5.61200300 | 1.90340800  | 0.57851200  |
| H | -5.58615500 | 0.27429600  | 1.19679300  |
| B | -2.48990000 | -0.10629500 | -0.53354500 |
| N | -0.20373000 | 1.93903200  | -0.70165700 |
| C | 1.00707200  | 2.45198000  | -0.11644500 |
| C | 1.97470700  | 3.13512200  | -0.86805800 |
| C | 1.21318100  | 2.29163000  | 1.26207800  |
| C | 3.12200700  | 3.64359900  | -0.25359000 |
| H | 1.83616500  | 3.27739700  | -1.93531200 |
| C | 2.36471100  | 2.78926600  | 1.86933300  |
| H | 0.45481500  | 1.78296400  | 1.84638000  |
| C | 3.32481100  | 3.46932900  | 1.11490900  |
| H | 3.85837300  | 4.17444000  | -0.85152800 |
| H | 2.50391500  | 2.66058600  | 2.93959700  |
| H | 4.21668500  | 3.86633000  | 1.59183900  |
| C | -0.74722500 | 2.75328700  | -1.79427300 |
| H | -0.18471600 | 2.66148400  | -2.73993700 |
| H | -1.77710400 | 2.45283800  | -1.99321100 |
| H | -0.74076500 | 3.80121000  | -1.48672300 |
| C | -0.15658100 | 0.52440300  | -1.07502000 |
| H | 0.44309700  | 0.37701800  | -1.98487400 |
| O | -1.44228400 | 0.06071000  | -1.41021500 |
| C | 1.90165200  | -1.87421400 | 1.17236800  |
| C | 1.77418800  | -3.38765500 | 0.83222500  |
| C | 2.38789000  | -1.35513500 | -1.35029700 |
| C | 2.25833300  | -2.87664100 | -1.66685000 |
| C | 4.36012700  | -1.44732800 | 0.38088100  |
| C | 3.82449700  | -0.89237100 | -0.95730600 |

|   |            |             |             |
|---|------------|-------------|-------------|
| C | 3.34079700 | -1.40859100 | 1.54058700  |
| C | 2.47742300 | -3.82831400 | -0.47015600 |
| H | 1.25237300 | -1.66900400 | 2.03419900  |
| H | 0.70215200 | -3.62122400 | 0.74889100  |
| H | 2.14839100 | -3.99590200 | 1.66901500  |
| H | 2.11976200 | -0.81566900 | -2.26829400 |
| H | 2.95362500 | -3.14724900 | -2.47505400 |
| H | 1.24930200 | -3.04689700 | -2.07091700 |
| H | 5.24722200 | -0.86803800 | 0.67035600  |
| H | 4.71764900 | -2.47121700 | 0.23717100  |
| H | 3.81563600 | 0.20592900  | -0.90372200 |
| H | 4.52851400 | -1.14994200 | -1.76239800 |
| H | 3.72636200 | -2.00402400 | 2.38158600  |
| H | 3.26999400 | -0.37480500 | 1.90807500  |
| H | 2.11831600 | -4.82883000 | -0.74659900 |
| H | 3.54935600 | -3.94632800 | -0.28722000 |
| B | 1.45934300 | -1.06505600 | -0.10496300 |
| O | 0.37058800 | -0.23336100 | -0.02086800 |

TS3

0 1

|   |            |             |             |
|---|------------|-------------|-------------|
| C | 2.99197300 | -2.63756400 | 0.92550100  |
| C | 1.50980500 | -0.23970800 | 0.15830100  |
| C | 4.33201200 | -2.72913900 | 1.71261900  |
| C | 2.04121500 | -1.08047000 | 2.76928000  |
| C | 3.36647100 | -1.19179400 | 3.56411400  |
| C | 1.39265700 | -3.61371100 | 2.77308300  |
| C | 0.98784400 | -2.17004700 | 3.13637500  |
| C | 2.00169900 | -3.76385200 | 1.36101600  |
| C | 4.24645500 | -2.41200300 | 3.22109700  |
| H | 3.22376800 | -2.81201700 | -0.13584700 |
| H | 1.88457900 | 0.75451800  | 0.46733200  |
| H | 1.89053300 | -0.41286000 | -0.85769400 |
| H | 5.05048800 | -2.03420100 | 1.26458400  |
| H | 4.76547000 | -3.73315000 | 1.58271900  |
| H | 1.60525800 | -0.11350700 | 3.03152700  |
| H | 3.15931300 | -1.19546600 | 4.64649200  |
| H | 3.92502600 | -0.27010700 | 3.36382300  |
| H | 0.50964100 | -4.26530800 | 2.84797200  |
| H | 2.09292400 | -3.98991900 | 3.52393800  |
| H | 0.04476200 | -1.92884100 | 2.61909000  |
| H | 0.75774100 | -2.12081100 | 4.21250600  |

|   |             |             |             |
|---|-------------|-------------|-------------|
| H | 2.50797700  | -4.73947000 | 1.29259400  |
| H | 1.18471100  | -3.80279700 | 0.63654800  |
| H | 5.26290000  | -2.23456500 | 3.59934700  |
| H | 3.88983800  | -3.29402900 | 3.76324900  |
| C | 0.01836300  | -0.14212700 | 0.07324800  |
| C | -0.93936400 | -1.08398400 | -0.24184700 |
| C | -2.00676900 | 0.89770400  | -0.03686500 |
| C | -3.05303800 | 1.94175400  | -0.10451800 |
| C | -2.96943500 | 3.13506100  | 0.63980000  |
| C | -4.16772600 | 1.78346900  | -0.95352100 |
| C | -3.96056700 | 4.10955900  | 0.55034000  |
| H | -2.12792500 | 3.31791100  | 1.28664400  |
| C | -5.15490500 | 2.76144400  | -1.04053400 |
| H | -4.27252800 | 0.89572400  | -1.55592800 |
| C | -5.06124400 | 3.93092200  | -0.28646600 |
| H | -3.86293500 | 5.01436000  | 1.14299800  |
| H | -5.99688700 | 2.60443100  | -1.70850700 |
| H | -5.83155200 | 4.69369100  | -0.35461600 |
| C | -3.45931300 | -1.11056600 | -0.42471600 |
| C | -4.23523200 | -1.30245800 | 0.73934100  |
| C | -3.86861300 | -1.56700100 | -1.69816400 |
| C | -5.46948900 | -1.94756100 | 0.58969300  |
| C | -5.11375000 | -2.20235600 | -1.77878500 |
| C | -5.90996000 | -2.38858500 | -0.65310200 |
| H | -6.09230700 | -2.10667000 | 1.46482300  |
| H | -5.46284700 | -2.55889400 | -2.74300900 |
| H | -6.87261100 | -2.88403000 | -0.74452500 |
| C | -0.75443700 | -2.49482100 | -0.63944900 |
| C | -1.48643300 | -3.54923400 | -0.07039000 |
| C | 0.18735100  | -2.79160700 | -1.63998500 |
| C | -1.28152100 | -4.86257400 | -0.49240100 |
| H | -2.21150400 | -3.34705700 | 0.70908400  |
| C | 0.39498900  | -4.10570600 | -2.05562900 |
| H | 0.75987600  | -1.98884100 | -2.09228900 |
| C | -0.34045100 | -5.14565500 | -1.48436600 |
| H | -1.85148300 | -5.66663500 | -0.03540300 |
| H | 1.13278600  | -4.31412400 | -2.82495100 |
| H | -0.17719700 | -6.17071600 | -1.80500400 |
| C | -0.04202700 | 2.38844500  | 0.29244600  |
| C | 0.27128800  | 2.93872900  | 1.55432600  |
| C | 0.19165800  | 3.06676600  | -0.92201100 |
| C | 0.77208700  | 4.24627900  | 1.56197600  |
| C | 0.70560400  | 4.36561900  | -0.84409400 |
| C | 0.97815700  | 4.95683400  | 0.38425000  |

|   |             |             |             |
|---|-------------|-------------|-------------|
| H | 1.02594300  | 4.70617500  | 2.51068700  |
| H | 0.90076400  | 4.91566700  | -1.75974600 |
| H | 1.37510700  | 5.96751600  | 0.42422000  |
| B | 2.28656100  | -1.22689400 | 1.20360000  |
| N | -0.67741900 | 1.07684000  | 0.20234800  |
| N | -2.18227100 | -0.42701000 | -0.28971700 |
| C | 0.09907900  | 2.20096900  | 2.88466400  |
| H | -0.00150400 | 1.13400500  | 2.66204400  |
| C | 1.34104300  | 2.36956000  | 3.78459100  |
| H | 1.25833900  | 1.69205100  | 4.64283300  |
| H | 2.25930500  | 2.14374600  | 3.23275400  |
| H | 1.40177600  | 3.38814100  | 4.18830500  |
| C | -1.16421900 | 2.62959200  | 3.66381800  |
| H | -1.17640100 | 3.71347500  | 3.83356000  |
| H | -2.09674600 | 2.35539900  | 3.15969200  |
| H | -1.16801100 | 2.14294900  | 4.64580300  |
| C | -0.06232500 | 2.44918600  | -2.29605900 |
| H | -0.50965000 | 1.45922400  | -2.15764800 |
| C | -1.05373600 | 3.28139200  | -3.13280400 |
| H | -1.25258100 | 2.78180300  | -4.08837500 |
| H | -2.00761700 | 3.41865400  | -2.61280600 |
| H | -0.65019100 | 4.27437900  | -3.36056500 |
| C | 1.26128700  | 2.23742900  | -3.05912000 |
| H | 1.97302000  | 1.64669000  | -2.47467000 |
| H | 1.07281100  | 1.71908300  | -4.00695400 |
| H | 1.73936100  | 3.19497900  | -3.29445400 |
| C | -3.04267500 | -1.40227600 | -2.97603400 |
| H | -2.06940300 | -0.98197800 | -2.70628700 |
| C | -2.78710500 | -2.76237400 | -3.65714800 |
| H | -3.71423000 | -3.18439900 | -4.06220500 |
| H | -2.09243500 | -2.63422200 | -4.49463400 |
| H | -2.35632800 | -3.48915600 | -2.96503000 |
| C | -3.70151400 | -0.43524400 | -3.98297900 |
| H | -3.79800400 | 0.58019700  | -3.58692700 |
| H | -3.09325400 | -0.37746500 | -4.89266600 |
| H | -4.70016000 | -0.78164800 | -4.27333500 |
| C | -3.80414600 | -0.85138900 | 2.13531900  |
| H | -2.81879000 | -0.38152700 | 2.06424000  |
| C | -3.65988800 | -2.04330900 | 3.10333600  |
| H | -3.32987200 | -1.68776000 | 4.08559900  |
| H | -4.61146900 | -2.56906400 | 3.24161100  |
| H | -2.92084100 | -2.76935000 | 2.74927200  |
| C | -4.77608900 | 0.19694300  | 2.71464300  |
| H | -4.88706200 | 1.05791600  | 2.04896900  |

|   |             |             |             |
|---|-------------|-------------|-------------|
| H | -5.77131100 | -0.23179000 | 2.88001600  |
| H | -4.40627500 | 0.55716700  | 3.68120100  |
| C | 4.22525500  | 0.90250900  | 0.88967700  |
| H | 5.22714900  | 0.62431500  | 1.30428300  |
| N | 4.46710000  | 1.39481700  | -0.54560500 |
| C | 5.25242600  | 0.70089000  | -1.44726100 |
| C | 5.52517100  | -0.68054200 | -1.28694300 |
| C | 5.80316200  | 1.32620200  | -2.59624200 |
| C | 6.29180000  | -1.38067000 | -2.21298300 |
| H | 5.11787800  | -1.20844800 | -0.43741700 |
| C | 6.56492100  | 0.60909700  | -3.51625700 |
| H | 5.63595800  | 2.38266000  | -2.76903900 |
| C | 6.82300000  | -0.75113600 | -3.34142600 |
| H | 6.47552500  | -2.44015900 | -2.04440200 |
| H | 6.96711200  | 1.13146600  | -4.38249300 |
| H | 7.42235300  | -1.30355500 | -4.05997600 |
| C | 4.33449000  | 2.83114600  | -0.70278000 |
| H | 3.83361500  | 3.08885000  | -1.64519000 |
| H | 3.73286900  | 3.17425000  | 0.13906700  |
| H | 5.30950800  | 3.34833000  | -0.68816100 |
| O | 3.48702600  | 1.70381500  | 1.58416700  |
| H | 3.72333000  | -0.17200400 | 0.76294300  |

TS3f

0 1

|   |             |             |             |
|---|-------------|-------------|-------------|
| C | -1.97532900 | -0.51030000 | 1.10007800  |
| C | -2.38350700 | 0.76202300  | 1.88516000  |
| C | -2.30102000 | 0.81071400  | -1.15481700 |
| C | -2.70473000 | 2.06865400  | -0.34571600 |
| C | -4.14233600 | -0.85878300 | -0.33200200 |
| C | -3.47351700 | -0.13957300 | -1.52681700 |
| C | -3.15545800 | -1.44298400 | 0.70568700  |
| C | -3.21225000 | 1.79633300  | 1.08897300  |
| H | -1.30479600 | -1.09434800 | 1.74857800  |
| H | -1.45816900 | 1.24825300  | 2.22921800  |
| H | -2.93852100 | 0.49182500  | 2.79666800  |
| H | -1.85553600 | 1.15389200  | -2.10211600 |
| H | -3.46666100 | 2.65172500  | -0.88546100 |
| H | -1.81892600 | 2.71936700  | -0.28238900 |
| H | -4.76972300 | -1.67423900 | -0.71800200 |
| H | -4.83556300 | -0.17433200 | 0.16685900  |
| H | -3.07165100 | -0.90041800 | -2.21057300 |
| H | -4.24525000 | 0.40323600  | -2.09380300 |
| H | -3.71836900 | -1.74753900 | 1.60141000  |



|   |             |             |             |
|---|-------------|-------------|-------------|
| H | -2.72139200 | -2.36421200 | 0.29124300  |
| H | -3.22399100 | 2.74340200  | 1.64629100  |
| H | -4.25729800 | 1.47354500  | 1.05049200  |
| B | -1.29663500 | -0.06797600 | -0.27951000 |
| C | 0.53160700  | -0.47195500 | -0.86896800 |
| H | 0.81617300  | 0.24724800  | -1.64224700 |
| N | 1.59894000  | -0.99438100 | -0.18572800 |
| C | 2.81036600  | -0.25961300 | -0.08751500 |
| C | 2.82351600  | 1.13693900  | -0.24020300 |
| C | 4.01709900  | -0.92657200 | 0.17587500  |
| C | 4.02613100  | 1.83869700  | -0.16408100 |
| H | 1.89852000  | 1.68373700  | -0.38676300 |
| C | 5.21008700  | -0.21165600 | 0.26165100  |
| H | 4.03066100  | -2.00326000 | 0.30198000  |
| C | 5.22564800  | 1.17261400  | 0.08563900  |
| H | 4.01573300  | 2.91851300  | -0.28422700 |
| H | 6.13419400  | -0.74681800 | 0.46235100  |
| H | 6.15832000  | 1.72495900  | 0.15114800  |
| C | 1.44002700  | -2.23800200 | 0.57052400  |
| H | 1.72355500  | -2.08581300 | 1.61684200  |
| H | 0.39722900  | -2.54111300 | 0.50636400  |
| H | 2.05935100  | -3.03374500 | 0.14298500  |
| O | -0.56212300 | -1.19437300 | -1.04083100 |
| H | -0.17831800 | 0.60245600  | -0.00336900 |

TS4

0 1

|   |             |             |             |
|---|-------------|-------------|-------------|
| C | -1.22197200 | 0.02572100  | 2.81797600  |
| C | -0.62015800 | 0.76839700  | 0.06910200  |
| C | 0.12850500  | 0.60293100  | 3.31735500  |
| C | -1.91956700 | 2.38460500  | 2.03935300  |
| C | -0.55193700 | 2.94155100  | 2.47603000  |
| C | -2.75191000 | 1.46307900  | 4.35969000  |
| C | -2.97498300 | 2.43081200  | 3.17791600  |
| C | -2.29931600 | 0.05407900  | 3.93029600  |
| C | 0.17576300  | 2.12552900  | 3.56038600  |
| H | -1.02618500 | -1.03733000 | 2.62154300  |
| H | -1.20500600 | 0.13483800  | -0.60652800 |
| H | -0.61773800 | 1.76761100  | -0.37409000 |
| H | 0.89762900  | 0.36413700  | 2.57142800  |
| H | 0.44319000  | 0.08976500  | 4.24368100  |
| H | -2.27748000 | 3.06316600  | 1.25177400  |
| H | -0.65131000 | 3.98211800  | 2.82719600  |
| H | 0.08551300  | 2.98446400  | 1.58302800  |

|   |             |             |             |
|---|-------------|-------------|-------------|
| H | -3.68798500 | 1.38185600  | 4.93183200  |
| H | -2.02672900 | 1.88281900  | 5.06464500  |
| H | -3.94725800 | 2.19007400  | 2.74074300  |
| H | -3.06480900 | 3.45585000  | 3.57557600  |
| H | -1.94886000 | -0.49386000 | 4.82199400  |
| H | -3.17961700 | -0.49301700 | 3.57104400  |
| H | 1.22737400  | 2.44767600  | 3.62235500  |
| H | -0.24808600 | 2.36066900  | 4.54064400  |
| C | 0.77457300  | 0.25859000  | 0.02382000  |
| C | 1.28131700  | -1.00785500 | 0.27496200  |
| C | 3.04368900  | 0.26947800  | -0.32682900 |
| C | 4.40794300  | 0.65317900  | -0.75740600 |
| C | 4.61616600  | 1.47562400  | -1.88350900 |
| C | 5.54848400  | 0.18113300  | -0.07701000 |
| C | 5.90226000  | 1.80934000  | -2.30259100 |
| H | 3.77744300  | 1.86429500  | -2.43948700 |
| C | 6.83176200  | 0.52077100  | -0.49933900 |
| H | 5.44460200  | -0.45095100 | 0.79093300  |
| C | 7.01931100  | 1.33702700  | -1.61447600 |
| H | 6.02405600  | 2.44352300  | -3.17596800 |
| H | 7.68683900  | 0.14466400  | 0.05495100  |
| H | 8.02077200  | 1.60143800  | -1.94156300 |
| C | 3.56664100  | -2.08280400 | 0.35001500  |
| C | 4.00925100  | -2.85735200 | -0.74120700 |
| C | 3.97158700  | -2.34021700 | 1.68226500  |
| C | 4.91631800  | -3.89115300 | -0.47281100 |
| C | 4.88462300  | -3.38246300 | 1.88068500  |
| C | 5.35988100  | -4.14653500 | 0.81851100  |
| H | 5.27874900  | -4.50265700 | -1.29353700 |
| H | 5.22508900  | -3.60272800 | 2.88719700  |
| H | 6.06870500  | -4.94942000 | 1.00192700  |
| C | 0.56732200  | -2.30189000 | 0.41709700  |
| C | -0.01748800 | -2.86202800 | -0.73132400 |
| C | 0.45798000  | -2.99466500 | 1.62996200  |
| C | -0.68287600 | -4.08684400 | -0.67135200 |
| H | 0.04242100  | -2.32568500 | -1.67427700 |
| C | -0.20377500 | -4.22149800 | 1.69040800  |
| H | 0.86304500  | -2.55943800 | 2.53413800  |
| C | -0.77152900 | -4.77291800 | 0.54102300  |
| H | -1.13878200 | -4.49818700 | -1.56745600 |
| H | -0.28568200 | -4.74016700 | 2.64152600  |
| H | -1.29247300 | -5.72492400 | 0.59183800  |
| C | 1.81205900  | 2.31907000  | -1.04470800 |
| C | 1.32648800  | 2.31687000  | -2.37801000 |

|   |             |             |             |
|---|-------------|-------------|-------------|
| C | 2.25289900  | 3.49994000  | -0.40411800 |
| C | 1.26986100  | 3.54304700  | -3.04902000 |
| C | 2.18337000  | 4.69025300  | -1.14282900 |
| C | 1.69426200  | 4.72013300  | -2.44227300 |
| H | 0.89391600  | 3.57175000  | -4.06713500 |
| H | 2.51511400  | 5.61414500  | -0.68125300 |
| H | 1.64366300  | 5.66095900  | -2.98343100 |
| B | -1.76800300 | 0.84871400  | 1.48142300  |
| N | 1.90289300  | 1.02575800  | -0.37524500 |
| N | 2.67294700  | -0.96188600 | 0.09862100  |
| C | 0.91731400  | 1.05543100  | -3.14718500 |
| H | 0.96692500  | 0.20029300  | -2.46747500 |
| C | -0.53034100 | 1.13739200  | -3.66636300 |
| H | -0.80692800 | 0.19273600  | -4.14903000 |
| H | -1.23924300 | 1.32851400  | -2.85990800 |
| H | -0.64478000 | 1.93099000  | -4.41373700 |
| C | 1.87462200  | 0.76466400  | -4.32381700 |
| H | 1.87876700  | 1.58840600  | -5.04679000 |
| H | 2.90598700  | 0.60108300  | -3.99573800 |
| H | 1.54634600  | -0.13677900 | -4.85441900 |
| C | 2.82707900  | 3.56628500  | 1.01357200  |
| H | 2.54257900  | 2.64858200  | 1.53955800  |
| C | 4.36886600  | 3.67004000  | 1.01208800  |
| H | 4.73336900  | 3.74217200  | 2.04369600  |
| H | 4.85581900  | 2.81657700  | 0.53984700  |
| H | 4.69091200  | 4.57515600  | 0.48319700  |
| C | 2.27473300  | 4.76318600  | 1.81744800  |
| H | 1.19006200  | 4.84892300  | 1.74612600  |
| H | 2.53612600  | 4.64446400  | 2.87444400  |
| H | 2.71879200  | 5.70714700  | 1.48065300  |
| C | 3.47821100  | -1.54235000 | 2.89332200  |
| H | 2.55860500  | -1.02393600 | 2.61042300  |
| C | 3.14051600  | -2.45373700 | 4.09178600  |
| H | 4.04485700  | -2.83679000 | 4.57843700  |
| H | 2.58557100  | -1.88114600 | 4.84256800  |
| H | 2.53186100  | -3.31395100 | 3.79724200  |
| C | 4.47990100  | -0.46051300 | 3.35214100  |
| H | 4.62764000  | 0.31994200  | 2.60043700  |
| H | 4.10499500  | 0.02684100  | 4.25889400  |
| H | 5.45745900  | -0.89972900 | 3.58608100  |
| C | 3.55949500  | -2.63098100 | -2.18235600 |
| H | 2.83423700  | -1.81093100 | -2.19224400 |
| C | 2.85177200  | -3.87725900 | -2.75179100 |
| H | 2.47246600  | -3.66545700 | -3.75835500 |

|   |             |             |             |
|---|-------------|-------------|-------------|
| H | 3.54056700  | -4.72596400 | -2.83227400 |
| H | 2.01014100  | -4.18345900 | -2.12434600 |
| C | 4.73716500  | -2.22393600 | -3.09142800 |
| H | 5.25050700  | -1.33262600 | -2.72052300 |
| H | 5.47504600  | -3.03111400 | -3.16706600 |
| H | 4.37381200  | -2.01336600 | -4.10391900 |
| O | -3.07407700 | 0.29637900  | 0.96370200  |
| C | -3.01659200 | -1.74955000 | 0.91117800  |
| H | -3.19921400 | -1.88839700 | 1.96786000  |
| C | -4.02606800 | 0.89490200  | -1.49344300 |
| C | -5.29778500 | 0.83709600  | -2.38895500 |
| C | -5.44084800 | 1.65140200  | 0.52736800  |
| C | -6.73763700 | 1.39265100  | -0.29081400 |
| C | -4.29911900 | 3.44682500  | -1.01218400 |
| C | -4.97739200 | 3.11970700  | 0.33544800  |
| C | -3.40117100 | 2.31571000  | -1.54386300 |
| C | -6.57063900 | 1.51215400  | -1.81942000 |
| H | -3.28286700 | 0.22611900  | -1.96356000 |
| H | -5.53620000 | -0.20836400 | -2.59951900 |
| H | -5.07683000 | 1.28795500  | -3.37136700 |
| H | -5.72475100 | 1.56740700  | 1.58776400  |
| H | -7.52614100 | 2.09504100  | 0.02553800  |
| H | -7.12544700 | 0.39216100  | -0.06225600 |
| H | -3.69382000 | 4.35839100  | -0.89759000 |
| H | -5.05076900 | 3.69670400  | -1.76740700 |
| H | -4.27993700 | 3.37353400  | 1.13564100  |
| H | -5.83668500 | 3.79765600  | 0.47095700  |
| H | -3.11806500 | 2.56423400  | -2.58020100 |
| H | -2.47390000 | 2.31738600  | -0.96399900 |
| H | -7.45225000 | 1.07577500  | -2.31111700 |
| H | -6.58680300 | 2.57107300  | -2.09529000 |
| B | -4.31169900 | 0.51371700  | 0.08500700  |
| N | -4.95147800 | -0.98034500 | 0.37644300  |
| C | -5.48155200 | -1.89625200 | -0.56410400 |
| C | -6.72856100 | -2.53333100 | -0.39395800 |
| C | -4.70524700 | -2.29487300 | -1.67590700 |
| C | -7.18676900 | -3.48544100 | -1.30466100 |
| H | -7.36430200 | -2.26916100 | 0.44258000  |
| C | -5.16796200 | -3.24668600 | -2.58055000 |
| H | -3.73764700 | -1.83343000 | -1.83198800 |
| C | -6.41328000 | -3.85328400 | -2.40478700 |
| H | -8.16189000 | -3.94038300 | -1.14733700 |
| H | -4.54476400 | -3.51816900 | -3.42968500 |
| H | -6.77145400 | -4.59849100 | -3.10979700 |

|   |             |             |            |
|---|-------------|-------------|------------|
| C | -5.59642100 | -1.06211000 | 1.69457500 |
| H | -5.62729000 | -2.10255300 | 2.04314200 |
| H | -5.01329600 | -0.46779100 | 2.39579400 |
| H | -6.62211300 | -0.67325300 | 1.69291800 |
| H | -1.98488900 | -1.53138400 | 0.68742500 |
| H | -3.38525400 | -2.56443800 | 0.29167700 |

TS4

0 1

|   |             |             |             |
|---|-------------|-------------|-------------|
| C | -1.40720100 | -2.23620000 | -2.02839100 |
| C | -0.50812700 | -0.81429700 | 0.33324100  |
| C | -0.09724500 | -2.75259300 | -2.67933600 |
| C | -0.88150000 | -3.63483800 | 0.10490500  |
| C | 0.43963500  | -4.10943900 | -0.55334200 |
| C | -2.60069300 | -4.54414400 | -1.65541900 |
| C | -2.08741200 | -4.56304300 | -0.19455500 |
| C | -2.62117300 | -3.15376600 | -2.33647300 |
| C | 0.45663000  | -4.06630200 | -2.09350900 |
| H | -1.62500900 | -1.26186500 | -2.49485300 |
| H | -1.15100700 | 0.03721600  | 0.07845200  |
| H | 0.67091200  | -1.97848200 | -2.55644900 |
| H | -0.22526500 | -2.87319800 | -3.76780900 |
| H | -0.72624500 | -3.66888000 | 1.19789300  |
| H | 0.70114700  | -5.12897700 | -0.22511300 |
| H | 1.25216800  | -3.46125400 | -0.18938800 |
| H | -3.61772600 | -4.96107700 | -1.67740100 |
| H | -2.00028300 | -5.23406100 | -2.25798000 |
| H | -2.90807800 | -4.24827000 | 0.46546300  |
| H | -1.86116800 | -5.60679900 | 0.08140800  |
| H | -2.72933200 | -3.30309700 | -3.42337800 |
| H | -3.53058200 | -2.62650000 | -2.01877400 |
| H | 1.49060400  | -4.21279700 | -2.44516200 |
| H | -0.10152200 | -4.91847000 | -2.49200400 |
| C | 0.89079300  | -0.36279000 | 0.10076900  |
| C | 1.47524600  | 0.19943100  | -1.01976200 |
| C | 3.07396100  | 0.08528600  | 0.57611600  |
| C | 4.33436100  | 0.33454300  | 1.31144400  |
| C | 4.30553000  | 0.81948200  | 2.63478600  |
| C | 5.59535600  | 0.14476100  | 0.71205700  |
| C | 5.48373200  | 1.09174000  | 3.32614200  |
| H | 3.36347500  | 0.99061300  | 3.13301800  |
| C | 6.77002900  | 0.41627100  | 1.41020500  |

|   |             |             |             |
|---|-------------|-------------|-------------|
| H | 5.67192300  | -0.21664900 | -0.30156500 |
| C | 6.72400500  | 0.88969100  | 2.72119300  |
| H | 5.42419900  | 1.46788900  | 4.34329000  |
| H | 7.72532800  | 0.25194200  | 0.92016900  |
| H | 7.64162200  | 1.10055400  | 3.26275400  |
| C | 3.82504400  | 0.87026100  | -1.67173100 |
| C | 4.14159200  | 2.24076600  | -1.69776300 |
| C | 4.43827000  | -0.07996200 | -2.52396300 |
| C | 5.14700700  | 2.65034400  | -2.58413700 |
| C | 5.44148300  | 0.39163700  | -3.37786100 |
| C | 5.79995100  | 1.73804100  | -3.40383900 |
| H | 5.41764900  | 3.70090800  | -2.62921200 |
| H | 5.94401400  | -0.30407100 | -4.04198100 |
| H | 6.58167400  | 2.07647200  | -4.07840700 |
| C | 0.81150100  | 0.77391900  | -2.21429300 |
| C | -0.24997500 | 1.67282500  | -2.00353300 |
| C | 1.19621300  | 0.49725800  | -3.53451900 |
| C | -0.91343100 | 2.26438300  | -3.07728000 |
| H | -0.55941300 | 1.91981500  | -0.99319000 |
| C | 0.53895100  | 1.09619800  | -4.60812200 |
| H | 1.99673400  | -0.20217400 | -3.73058000 |
| C | -0.51884500 | 1.97824500  | -4.38509500 |
| H | -1.73686400 | 2.94460600  | -2.88264500 |
| H | 0.84977900  | 0.86132800  | -5.62240000 |
| H | -1.03517500 | 2.43627700  | -5.22408800 |
| C | 1.66742300  | -0.70137500 | 2.49331200  |
| C | 0.94768700  | 0.23770200  | 3.27502800  |
| C | 2.20051400  | -1.88728900 | 3.04191700  |
| C | 0.80075000  | -0.03992200 | 4.63895400  |
| C | 2.02210900  | -2.09920200 | 4.41602400  |
| C | 1.33691900  | -1.18927600 | 5.21013700  |
| H | 0.25644800  | 0.66165500  | 5.26310000  |
| H | 2.42802300  | -2.99960300 | 4.86616100  |
| H | 1.21256400  | -1.37794600 | 6.27293500  |
| B | -1.25148500 | -2.13904500 | -0.41162800 |
| N | 1.89737900  | -0.38653700 | 1.08724000  |
| N | 2.83196600  | 0.40357300  | -0.71988000 |
| C | 0.34285800  | 1.53760900  | 2.73595700  |
| H | 0.43312100  | 1.54133200  | 1.64646400  |
| C | -1.15813000 | 1.64939200  | 3.07160600  |
| H | -1.59124000 | 2.52511500  | 2.57915300  |
| H | -1.72169100 | 0.77485000  | 2.73780000  |
| H | -1.32271400 | 1.76481800  | 4.14887000  |
| C | 1.08853500  | 2.78375300  | 3.26021200  |

|   |             |             |             |
|---|-------------|-------------|-------------|
| H | 1.05586400  | 2.83621400  | 4.35466400  |
| H | 2.14003100  | 2.80050600  | 2.95390500  |
| H | 0.61303700  | 3.69070100  | 2.87067300  |
| C | 2.95706600  | -2.94621800 | 2.24345100  |
| H | 2.91490200  | -2.67560900 | 1.18339300  |
| C | 4.44150000  | -3.02778300 | 2.65754400  |
| H | 4.96097100  | -3.77018500 | 2.04034600  |
| H | 4.95734500  | -2.07064900 | 2.54756700  |
| H | 4.53891200  | -3.34285200 | 3.70309700  |
| C | 2.29959600  | -4.33329700 | 2.39193400  |
| H | 1.23487900  | -4.30476400 | 2.14924500  |
| H | 2.78238000  | -5.04918400 | 1.71790800  |
| H | 2.40796900  | -4.71723700 | 3.41281800  |
| C | 4.05282300  | -1.56482900 | -2.55388600 |
| H | 3.05257900  | -1.66486800 | -2.12044400 |
| C | 3.98147100  | -2.12498000 | -3.98987000 |
| H | 4.97850700  | -2.24334900 | -4.42930400 |
| H | 3.51253800  | -3.11419600 | -3.97246600 |
| H | 3.39618800  | -1.48779300 | -4.66001500 |
| C | 5.00166600  | -2.45306600 | -1.72007600 |
| H | 4.96746300  | -2.21885000 | -0.65257200 |
| H | 4.71684500  | -3.50482500 | -1.83417800 |
| H | 6.03953400  | -2.34812900 | -2.05910600 |
| C | 3.43865400  | 3.27974200  | -0.82912300 |
| H | 2.70880800  | 2.76315200  | -0.19787700 |
| C | 2.65597400  | 4.28773100  | -1.69489800 |
| H | 2.12027700  | 4.99653100  | -1.05338500 |
| H | 3.32774600  | 4.86539800  | -2.34040900 |
| H | 1.92226800  | 3.78389600  | -2.33092200 |
| C | 4.42486900  | 4.00662400  | 0.10649300  |
| H | 4.97481400  | 3.30367300  | 0.74004400  |
| H | 5.15682800  | 4.59304900  | -0.46089200 |
| H | 3.88093200  | 4.70070600  | 0.75719000  |
| O | -4.76792000 | 1.09676000  | 1.20496300  |
| C | -3.96263100 | 2.94119500  | -0.49557300 |
| C | -5.05321700 | 3.49698600  | -1.44911600 |
| C | -5.45236800 | 3.58875200  | 1.55984900  |
| C | -6.52789100 | 4.15001800  | 0.59322200  |
| C | -3.43519500 | 5.10803200  | 0.87782800  |
| C | -4.38251700 | 4.62085800  | 1.99764600  |
| C | -2.91110600 | 3.99060600  | -0.05368500 |
| C | -6.02068600 | 4.52473700  | -0.81859400 |
| H | -3.42659300 | 2.14737700  | -1.04321800 |
| H | -5.64395700 | 2.63948900  | -1.80692700 |

|   |             |             |             |
|---|-------------|-------------|-------------|
| H | -4.60635000 | 3.94743000  | -2.35373200 |
| H | -5.97187500 | 3.24790000  | 2.46761500  |
| H | -7.03732500 | 5.02870200  | 1.02565900  |
| H | -7.30547600 | 3.37821600  | 0.48655500  |
| H | -2.57709800 | 5.62769300  | 1.33140700  |
| H | -3.94287400 | 5.86952700  | 0.27726300  |
| H | -3.77386000 | 4.15105300  | 2.78700400  |
| H | -4.84553600 | 5.50525100  | 2.46889500  |
| H | -2.42110800 | 4.46660500  | -0.92304100 |
| H | -2.10815700 | 3.45122800  | 0.47726300  |
| H | -6.88495000 | 4.65537500  | -1.48671700 |
| H | -5.53636100 | 5.50664300  | -0.78525400 |
| B | -4.71574400 | 2.34556800  | 0.82057400  |
| N | -4.65588500 | -1.74338000 | 0.99653800  |
| C | -5.81839700 | -2.08380100 | 0.22833800  |
| C | -6.19650500 | -3.42308600 | 0.08777900  |
| C | -6.57935900 | -1.06225600 | -0.35009000 |
| C | -7.33753400 | -3.74215300 | -0.64864400 |
| H | -5.59067200 | -4.20382400 | 0.53939900  |
| C | -7.71217300 | -1.39476200 | -1.09401100 |
| H | -6.27471300 | -0.03429700 | -0.16743700 |
| C | -8.09357700 | -2.72992300 | -1.24488400 |
| H | -7.62879200 | -4.78261900 | -0.76580200 |
| H | -8.30757300 | -0.60457800 | -1.54392500 |
| H | -8.97939600 | -2.98224500 | -1.82189700 |
| C | -4.72131000 | -1.86392300 | 2.45713900  |
| H | -3.73683500 | -2.13905100 | 2.84951700  |
| H | -5.03485000 | -0.89925200 | 2.87021300  |
| H | -5.43634500 | -2.64296600 | 2.72605500  |
| C | -3.70770700 | -0.95680700 | 0.47937800  |
| H | -2.46170800 | -1.89180300 | 0.04615700  |
| H | -3.82915600 | -0.59172600 | -0.52914700 |
| H | -3.08636900 | -0.39464100 | 1.15365300  |
| H | -0.62924600 | -0.97531600 | 1.40950000  |

TS4f

0 1

|   |             |             |             |
|---|-------------|-------------|-------------|
| C | -0.43152500 | -2.36813900 | 0.05706200  |
| C | -0.54624800 | -3.15074900 | 1.40927500  |
| C | -3.07502600 | -2.05873500 | 0.06174000  |
| C | -3.13329400 | -2.84815100 | 1.41727600  |
| C | -1.94865900 | -3.89286600 | -1.46199800 |



|   |             |             |             |
|---|-------------|-------------|-------------|
| C | -3.14956400 | -2.94736200 | -1.23066500 |
| C | -0.56208300 | -3.24722200 | -1.23363200 |
| C | -1.93000200 | -3.77560500 | 1.70253700  |
| H | 0.52506900  | -1.81057600 | 0.03286700  |
| H | -0.28322300 | -2.45409400 | 2.21650600  |
| H | 0.22370100  | -3.93358800 | 1.42882600  |
| H | -3.90967800 | -1.35008600 | 0.04091500  |
| H | -4.06523100 | -3.42952400 | 1.44348900  |
| H | -3.21543600 | -2.10821800 | 2.22540800  |
| H | -1.99942900 | -4.26665700 | -2.49289100 |
| H | -2.05330400 | -4.77709000 | -0.82739700 |
| H | -3.24290000 | -2.27042300 | -2.09145200 |
| H | -4.08100000 | -3.52938800 | -1.20151500 |
| H | 0.20872400  | -4.02893900 | -1.20560900 |
| H | -0.31078600 | -2.61191500 | -2.09361800 |
| H | -1.96763700 | -4.07175000 | 2.75889300  |
| H | -2.04344900 | -4.70444500 | 1.13676500  |
| B | -1.65281800 | -1.46896300 | 0.02832000  |
| O | 1.52256100  | -0.08301100 | -0.01035500 |
| C | 3.39587200  | 1.74357500  | -0.10083300 |
| C | 4.20951500  | 2.01095800  | 1.19270500  |
| C | 4.03901100  | -0.79208200 | 0.03765100  |
| C | 4.84800200  | -0.50565400 | 1.33011000  |
| C | 5.29787800  | 0.78996300  | -1.62482900 |
| C | 4.85002900  | -0.64802600 | -1.27723900 |
| C | 4.21150600  | 1.86917900  | -1.41462200 |
| C | 5.29592400  | 0.96143300  | 1.51950900  |
| H | 2.58835500  | 2.49197800  | -0.14233500 |
| H | 3.49572800  | 2.04141400  | 2.03116200  |
| H | 4.67980200  | 3.00860100  | 1.16631500  |
| H | 3.68558800  | -1.83338300 | 0.09422100  |
| H | 5.73703000  | -1.15590800 | 1.39306800  |
| H | 4.21342400  | -0.78649400 | 2.18526000  |
| H | 5.62902600  | 0.81694500  | -2.67345800 |
| H | 6.18578900  | 1.04740400  | -1.03835900 |
| H | 4.21669500  | -1.02066100 | -2.09750400 |
| H | 5.73931800  | -1.30091000 | -1.26764000 |
| H | 4.68241100  | 2.86358700  | -1.49545600 |
| H | 3.49869300  | 1.80941900  | -2.25218700 |
| H | 5.62662800  | 1.10226000  | 2.55915100  |
| H | 6.18403100  | 1.15374900  | 0.90888900  |
| B | 2.79896100  | 0.24263100  | -0.02183200 |
| N | -1.39774500 | 1.65161200  | -0.06610600 |
| C | -2.63129600 | 2.36329900  | -0.07090300 |

|   |             |             |             |
|---|-------------|-------------|-------------|
| C | -3.63435200 | 2.11385900  | -1.01834100 |
| C | -2.83513300 | 3.36231300  | 0.89421800  |
| C | -4.81935000 | 2.85167200  | -0.99362400 |
| H | -3.50424700 | 1.33991000  | -1.76731200 |
| C | -4.02542700 | 4.08354900  | 0.91851200  |
| H | -2.04463500 | 3.58968300  | 1.60317400  |
| C | -5.02455900 | 3.83411300  | -0.02596000 |
| H | -5.58799400 | 2.64583600  | -1.73359000 |
| H | -4.16460400 | 4.85690000  | 1.66879100  |
| H | -5.94864800 | 4.40432800  | -0.01047200 |
| C | -0.98572400 | 0.97691800  | 1.11453500  |
| H | -1.45193400 | -0.11498800 | 1.01878100  |
| H | 0.09508600  | 0.76571600  | 1.09267600  |
| H | -1.38233100 | 1.40727700  | 2.03330800  |
| C | -0.98093000 | 0.89148900  | -1.17969700 |
| H | -1.47030700 | -0.19219500 | -1.03140800 |
| H | -1.31758400 | 1.28022300  | -2.14022200 |
| H | 0.09486200  | 0.65409200  | -1.09962500 |

TS4mef

0 1

|   |            |             |             |
|---|------------|-------------|-------------|
| C | 2.82551800 | -1.88980600 | 0.15500000  |
| C | 3.67958900 | -2.21183700 | -1.10323800 |
| C | 3.12745200 | 0.66740000  | -0.24334900 |
| C | 3.90071100 | 0.32514400  | -1.55625200 |
| C | 4.63256900 | -0.56403500 | 1.51360200  |
| C | 4.02723900 | 0.76640100  | 1.01971400  |
| C | 3.64880800 | -1.74823200 | 1.47078800  |
| C | 4.57816300 | -1.05838900 | -1.59790900 |
| H | 2.15188300 | -2.74019600 | 0.31499500  |
| H | 2.99002500 | -2.48605400 | -1.91684400 |
| H | 4.29679100 | -3.10515700 | -0.92434600 |
| H | 2.68328500 | 1.65131000  | -0.40234400 |
| H | 4.65725400 | 1.10169800  | -1.74250800 |
| H | 3.19040500 | 0.39705900  | -2.39394000 |
| H | 4.98828700 | -0.43390000 | 2.54461500  |
| H | 5.52414800 | -0.80882400 | 0.92889100  |
| H | 3.41665400 | 1.19200800  | 1.82924400  |
| H | 4.83682600 | 1.49067800  | 0.84525700  |
| H | 4.19668700 | -2.68263500 | 1.66429600  |

|   |             |             |             |
|---|-------------|-------------|-------------|
| H | 2.93601100  | -1.64403400 | 2.30371400  |
| H | 4.89435900  | -1.26957200 | -2.62840600 |
| H | 5.50145200  | -1.03147100 | -1.01201500 |
| B | 2.06051400  | -0.50066300 | -0.05860800 |
| O | 0.69825000  | -0.42989900 | -0.11980500 |
| C | -0.24055700 | -2.20463500 | -0.61206900 |
| H | -0.19559400 | -2.82313600 | 0.27561400  |
| C | -1.01994700 | 1.28427700  | -1.23755800 |
| C | -2.35058600 | 2.06871000  | -1.04740100 |
| C | -0.46964800 | 1.59409000  | 1.27732000  |
| C | -1.88627400 | 2.18839200  | 1.50288100  |
| C | 0.52192300  | 3.25774500  | -0.50837800 |
| C | 0.56251700  | 2.69854800  | 0.93622300  |
| C | 0.15174100  | 2.23207500  | -1.60137600 |
| C | -2.47977100 | 2.88296400  | 0.26203200  |
| H | -1.15077900 | 0.63725700  | -2.12002800 |
| H | -3.18487700 | 1.36183500  | -1.08619300 |
| H | -2.50102100 | 2.74801400  | -1.90111600 |
| H | -0.14719900 | 1.16898900  | 2.23992300  |
| H | -1.86166300 | 2.91118500  | 2.33294000  |
| H | -2.56980500 | 1.38873900  | 1.82166400  |
| H | 1.49940400  | 3.70068000  | -0.74794500 |
| H | -0.18466200 | 4.09189300  | -0.55780600 |
| H | 1.56004200  | 2.29561700  | 1.13445900  |
| H | 0.44842500  | 3.53895600  | 1.63894700  |
| H | -0.08977000 | 2.78227200  | -2.52376900 |
| H | 1.02824100  | 1.61913500  | -1.84423500 |
| H | -3.54268100 | 3.09579800  | 0.44223000  |
| H | -2.00675200 | 3.86275300  | 0.14409800  |
| B | -0.60724200 | 0.46164000  | 0.10430500  |
| N | -1.53090400 | -0.76108300 | 0.58262500  |
| C | -2.86054000 | -1.04909600 | 0.19144400  |
| C | -3.85760900 | -1.40261500 | 1.12734000  |
| C | -3.22049100 | -1.09094200 | -1.17508200 |
| C | -5.14133400 | -1.75866700 | 0.71820500  |
| H | -3.64442800 | -1.37651400 | 2.18881500  |
| C | -4.50506600 | -1.45181300 | -1.57517500 |
| H | -2.49452700 | -0.81652000 | -1.92939500 |
| C | -5.47766500 | -1.79195000 | -0.63480400 |
| H | -5.88400900 | -2.00980200 | 1.47119200  |
| H | -4.74175800 | -1.46741200 | -2.63590000 |
| H | -6.47761300 | -2.07543800 | -0.95006600 |
| C | -1.20858200 | -1.21055000 | 1.94407100  |
| H | -1.53995400 | -2.24446700 | 2.09746800  |

|   |             |             |             |
|---|-------------|-------------|-------------|
| H | -0.12862200 | -1.16320100 | 2.08262400  |
| H | -1.67447900 | -0.58512700 | 2.71579300  |
| H | 0.63075100  | -2.27669100 | -1.24845600 |
| H | -1.17572100 | -2.23290000 | -1.15608200 |

## VI) References

- S1. M. M. Hansmann, P. W. Antoni, H. Pesch, *Angew. Chem., Int. Ed.* 2020, **59**, 5782–5787.
- S2. D. S. Raghuvanshi, A. K. Gupta, K. N. Singh, *Org. Lett.* 2012, **14**, 4326–4329.
- S3. T. L. Wang, L. G. Zhuo, Z. W. Li, F. Chen, Z. Y. Ding, Y. M. He, Q. H. Fan, J. F. Xiang, Z. X. Yu, A. S. C. Chan, *J. Am. Chem. Soc.* 2011, **133**, 9878–9891.
- S4. K. M. Lalit, B. Sourajit, B. Debasis, *Chem. Commun.*, 2020, **56**, 4777–4780.
- S5. G. R. Fulmer, A. J. M. Miller, N. H. Sherden, H. E. Gottlieb, A. Nudelman, B. M. Stoltz, J. E. Bercaw, K. I. Goldberg, *Organometallics* 2010, **29**, 2176–2179.
- S6. D. J. Liptrot, M. S. Hill, M. F. Mahon and A. S. S. Wilson, *Angew. Chem., Int. Ed.*, 2015, **54**, 13362–13365.
- S7. X. Jiang, C. Wang, Y. Wei, D. Xue, Z. Liu, J. A. Xiao, *Chem.-Eur. J.* 2014, **20**, 58–63.
- S8. M.-C. Fu, R. Shang, W.-M. Cheng, Y. Fu, *Angew. Chem., Int. Ed.* 2015, **54** (31), 9042–9046.
- S9. A. Das, J. Ahmed, N. M. Rajendran, D. Adhikari, S. K. Mandal, *J. Org. Chem.* 2021, **86**, 1, 1246–1252.
- S10. Z. Huang, X. Jiang, S. Zhou, P. Yang, C.-X. Du, Y. Li, *ChemSusChem* 2019, **12**, 3054–3059.
- S11. G. Li, J. Chen, D.-Y. Zhu, Y. Chen, J.-B. Xia, *Adv. Synth. Catal.* 2018, **360**, 2364–2369.
- S12. Z. Zhang, X. Wu, J. Han, W. Wu, L. Wang, *Tetrahedron Lett.* 2018, **59** (18), 1737–1741.
- S13. W.-C. Chen, J.-S. Shen, T. Jurca, C.-J. Peng, Y.-H. Lin, Y.-P. Wang, W.-C. Shih, G. P. A. Yap, T.-G. Ong, *Angew. Chem., Int. Ed.* 2015, **54**, 15207–15212.
- S14. D. Uraguchi, N. Kinoshita, T. Kizu, T. Ooi, *J. Am. Chem. Soc.* 2015, **137**, 13768–13771.
- S15. S. C. Cosgrove, J. M. C. Plane and S. P. Marsden, *Chem. Sci.* 2018, **9**, 6647–6652.

- S16. J.-A. GarcíaLópez, M. Çetin, M. F. Greaney, *Angew. Chem., Int. Ed.* 2015, **54**, 2156–2159.
- S17. P. Ren, O. Vechorkin, Z. Csok, I. Salihu, R. Scopelliti, X. L. Hu, *Dalton Trans.* 2011, **40**, 8906–8911.
- S18. S. Yang, W. Tang, Z. H. Yang and J. X. Xu, *ACS Catal.* 2018, **8**, 9320–9326.
- S19. H. Song, Y. Liu and Q. Wang, *Org. Lett.*, 2013, **15**, 3274-3277.
- S20. Dolomanov, O.V. Bourhis, L. J. Gildea, R. J. Howard, J.A.K. & H. Puschmann, (2009), *J. Appl. Cryst.* **42**, 339-341.
- S21. Sheldrick, G.M. (2015). *Acta Cryst.* **A71**, 3-8.
- S22. Sheldrick, G.M. (2015). *Acta Cryst.* **C71**, 3-8.
- S23. M. J. Frisch, *et al.* Gaussian 16, Revision B.01, Fox, Gaussian, Inc., Wallingford CT, 2016.
- S24. A. D. Becke, *J. Chem. Phys.* 1993, **98**, 5648–5652.
- S25. C. Lee, W. Yang, & R. G. Parr, *Phys. Rev. B* **37**, 785-789 (1988).
- S26. Y. Zhao, & D. G. Truhlar, *Theor. Chem. Acc.*, 2008, **120**, 215–241.
- S27. A. V. Marenich, C. J. Cramer, & D. G. Truhlar, *J. Phys. Chem. B*, 2009, **113**, 6378–6396.
